# Supplementary material for: Catalytic asymmetric formal (2 + 3) cycloaddition involving methyl-substituted 2-indolylmethanols
Source: Royal Society of Chemistry journal article supplement (doi:10.1039/d4qo01047g), 2024-01-01
Supplement: d4qo01047g1.pdf [file d4qo01047g1.pdf]

**Contents:**

- 1. General information (S2)**
- 2. Synthetic procedures and characterization data of substrates 1 and 8 (S2-S7)**
- 3. General procedure for the synthesis of products 3 (S7)**
- 4. Synthetic procedures and characterization data of products 3 (S7-S21)**
- 5. Procedure for one-mmol-scale reaction (S21-S22)**
- 6. Synthetic procedures and characterization data of products 6-7 (S22-S23)**
- 7. NMR spectra of substrates 1b-1g and 8 (S24-S30)**
- 8. NMR spectra of products 3 and 6-7 (S31-S54)**
- 9. HPLC traces of products 3 and 6-7 (S55-S77)**
- 10. X-ray single crystal data for product 3aa (S78)**
- 11. Theoretical calculations (S79-S141)**

## 1. General information

$^1\text{H}$  and  $^{13}\text{C}$  NMR spectra were measured at 400 and 100 MHz, respectively. The solvents used for NMR spectroscopy were  $\text{CDCl}_3$ , using tetramethylsilane as the internal reference. HRMS (ESI) was determined by a HRMS/MS instrument. Enantiomeric excesses (*ee*) were determined by chiral high-performance liquid chromatography (chiral HPLC). The chiral columns used for the determination of enantiomeric excesses by chiral HPLC were Chiralpak columns. Optical rotation values were measured with instruments operating at  $\lambda = 589$  nm, corresponding to the sodium D line at the temperatures indicated. The X-ray source used for the single crystal X-ray diffraction analysis of compound **3aa** were  $\text{GaK}\alpha$  ( $\lambda = 1.34139$ ), and the thermal ellipsoid was drawn at the 30% probability level. Analytical grade solvents for the column chromatography were distilled before use. All starting materials commercially available were used directly. Substrates **1-2** were synthesized according to the literature methods.<sup>1</sup>

## 2. Synthetic procedures and characterization data of substrates **1** and **8**

Substrates **1a**<sup>1</sup> and **2** are known compounds. Substrates **1b-1g**, **8** were prepared following the **Typical Procedure A**.

### Synthesis of substrate **1b-1g**:

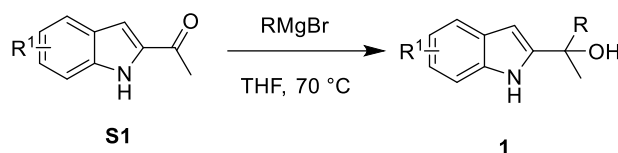

**Typical Procedure A:** Under argon atmosphere,  $\text{RMgBr}$  (20 mmol) was added to a flame-dried Schlenk bottle. The solution of **S1** (10 mmol) in anhydrous THF (20 mL) was added to the

<sup>1</sup> a) Y. Zhou, X.-P. Xu and S.-J. Ji, Cooperation of Mn(III)/Brønsted Acid for the Synthesis of Quindoline Derivatives via Dehydroxylation/Azidation/Cyclization Cascade of Diaryl(1*H*-indol-2-yl)methanols with Trimethylsilyl Azide, *Org. Lett.* 2019, **21**, 2039; b) J. Mao, H. Zhang, X.-F. Ding, X. Luo and W.-P. Deng, Synergistic Catalysis for Asymmetric [3 + 2] Cycloadditions of 2-Indolylmethanols with  $\alpha,\beta$ -Unsaturated Aldehydes, *J. Org. Chem.* 2019, **84**, 11186; c) Z. Tang, G. Hong, C. Hu, Q. Wang, Y. Zhong, Y. Gong, P. Yang and L. Wang,  $\text{La}(\text{OTf})_3$  Facilitated Self-Condensation of 2-Indolylmethanol: Construction of Highly Substituted Indeno[1,2-*b*]indoles, *Org. Biomol. Chem.* 2021, **19**, 10337; d) T.-Z. Li, S.-J. Liu, Y.-W. Sun, S. Deng, W. Tan, Y. Jiao, Y.-C. Zhang and F. Shi, Regio- and Enantioselective (3+3) Cycloaddition of Nitrones with 2-Indolylmethanols Enabled by Cooperative Organocatalysis, *Angew. Chem. Int. Ed.* 2021, **60**, 2355.

mixture at 0 °C, then the reaction mixture was stirred at 70 °C overnight. After the completion of the reaction indicated by TLC, the reaction mixture was quenched by saturated ammonium chloride solution and was extracted by ethyl acetate for three times. The combined organic layer was dried by anhydrous sodium sulfate, which was concentrated under the reduced pressure. The resulted residue was purified through flash chromatography on silica gel (petroleum ether/ethyl acetate = 20/1) to afford the pure **1**.

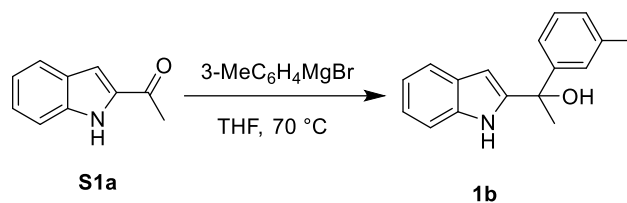

**Typical Procedure A:** Under argon atmosphere, 3-MeC<sub>6</sub>H<sub>4</sub>MgBr (20 mL, 1.0mol/L in THF) was added to a flame-dried Schlenk bottle. The solution of **S1a** (1.59 g, 10 mmol) in anhydrous THF (20 mL) was added to the mixture at 0 °C, then the reaction mixture was stirred at 70 °C overnight. After the completion of the reaction indicated by TLC, the reaction mixture was quenched by saturated ammonium chloride solution and was extracted by ethyl acetate for three times. The combined organic layer was dried by anhydrous sodium sulfate, which was concentrated under the reduced pressure. The resulted residue was purified through flash chromatography on silica gel (petroleum ether/ethyl acetate = 20/1) to afford the pure **1b** (1.8 g, 72% yield) as a brown solid; m.p. 156.9 – 157.3 °C; <sup>1</sup>H NMR (400 MHz, CDCl<sub>3</sub>) δ 8.16 (s, 1H), 7.60 (d, *J* = 7.6 Hz, 1H), 7.30 – 7.26 (m, 2H), 7.26 – 7.20 (m, 2H), 7.19 – 7.13 (m, 1H), 7.12 – 7.07 (m, 2H), 6.50 (s, 1H), 2.33 (s, 3H), 2.28 (s, 1H), 2.01 (s, 3H); <sup>13</sup>C NMR (100 MHz, CDCl<sub>3</sub>) δ 145.7, 144.2, 138.0, 136.0, 128.3, 128.2, 128.0, 125.9, 122.4, 122.1, 120.6, 119.8, 111.0, 99.6, 73.3, 30.9, 21.6; IR (KBr): 3496, 3319, 2981, 1605, 1456, 1417, 1291, 1142, 923, 746 cm<sup>-1</sup>; ESI FTMS exact mass calcd for (C<sub>17</sub>H<sub>17</sub>NO+Na)<sup>+</sup> requires m/z 274.1202, found m/z 274.1199.

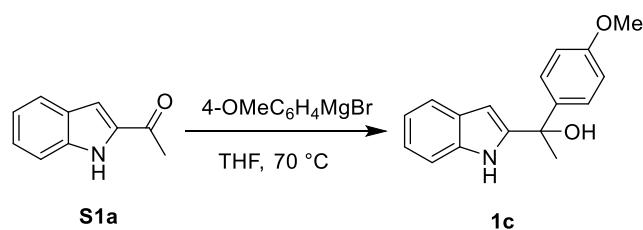

**Typical Procedure A:** Under argon atmosphere, 4-OMeC<sub>6</sub>H<sub>4</sub>MgBr (20 mL, 1.0mol/L in THF) was added to a flame-dried Schlenk bottle. The solution of **S1a** (1.59 g, 10 mmol) in anhydrous

THF (20 mL) was added to the mixture at 0 °C, then the reaction mixture was stirred at 70 °C overnight. After the completion of the reaction indicated by TLC, the reaction mixture was quenched by saturated ammonium chloride solution and was extracted by ethyl acetate for three times. The combined organic layer was dried by anhydrous sodium sulfate, which was concentrated under the reduced pressure. The resulted residue was purified through flash chromatography on silica gel (petroleum ether/ethyl acetate = 20/1) to afford the pure **1c** (2.1 g, 79% yield) as a brown solid; m.p. 117.1 – 117.8 °C; <sup>1</sup>H NMR (400 MHz, CDCl<sub>3</sub>) δ 8.20 (s, 1H), 7.59 (d, *J* = 7.6 Hz, 1H), 7.37 (d, *J* = 8.4 Hz, 2H), 7.29 – 7.26 (m, 1H), 7.18 – 7.13 (m, 1H), 7.12 – 7.07 (m, 1H), 6.85 (d, *J* = 8.8 Hz, 2H), 6.49 – 6.43 (m, 1H), 3.79 (s, 3H), 2.31 (s, 1H), 2.00 (s, 3H); <sup>13</sup>C NMR (100 MHz, CDCl<sub>3</sub>) δ 159.9, 153.2, 140.1, 136.3, 135.6, 132.6, 128.9, 128.0, 127.9, 124.7, 119.4, 116.8, 116.3, 112.3, 61.9, 39.3, 21.7; IR (KBr): 3334, 2931, 1608, 1508, 1457, 1339, 1290, 1249, 1176, 748 cm<sup>-1</sup>; ESI FTMS exact mass calcd for (C<sub>17</sub>H<sub>17</sub>NO<sub>2</sub>+Na)<sup>+</sup> requires *m/z* 290.1151, found *m/z* 290.1146.

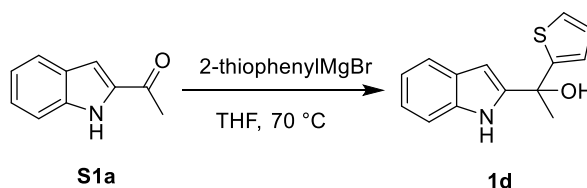

**Typical Procedure A:** Under argon atmosphere, 2-thiophenylMgBr (20 mL, 1.0 mol/L in THF) was added to a flame-dried Schlenk bottle. The solution of **S1a** (1.59 g, 10 mmol) in anhydrous THF (20 mL) was added to the mixture at 0 °C, then the reaction mixture was stirred at 70 °C overnight. After the completion of the reaction indicated by TLC, the reaction mixture was quenched by saturated ammonium chloride solution and was extracted by ethyl acetate for three times. The combined organic layer was dried by anhydrous sodium sulfate, which was concentrated under the reduced pressure. The resulted residue was purified through flash chromatography on silica gel (petroleum ether/ethyl acetate = 20/1) to afford the pure **1d** (1.8 g, 74% yield) as a brown solid; m.p. 102.6 – 102.8 °C; <sup>1</sup>H NMR (400 MHz, CDCl<sub>3</sub>) δ 8.37 (s, 1H), 7.60 (d, *J* = 8.0 Hz, 1H), 7.32 (d, *J* = 8.0 Hz, 1H), 7.27 (s, 1H), 7.21 – 7.17 (m, 1H), 7.13 – 7.09 (m, 1H), 6.96 – 6.93 (m, 2H), 6.48 – 6.46 (m, 1H), 2.58 (s, 1H), 2.11 (s, 3H); <sup>13</sup>C NMR (100 MHz, CDCl<sub>3</sub>) δ 150.9, 143.3, 135.7, 128.1, 126.8, 125.0, 124.1, 122.2, 120.7, 119.9, 111.1, 99.2, 72.0, 31.7; IR (KBr): 3400, 3055, 2978, 1456, 1373, 1290, 1233, 1098, 793, 745 cm<sup>-1</sup>; ESI FTMS exact mass calcd for (C<sub>14</sub>H<sub>13</sub>NOS+Na)<sup>+</sup> requires *m/z* 266.0610, found *m/z* 266.0605.

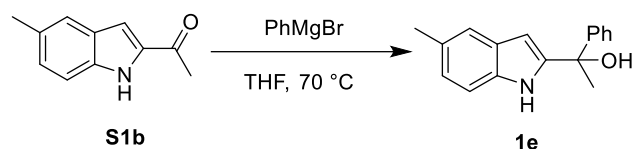

**Typical Procedure A:** Under argon atmosphere, PhMgBr (7.1 mL, 2.8 mol/L in THF) was added to a flame-dried Schlenk bottle. The solution of **S1b** (1.72 g, 10 mmol) in anhydrous THF (20 mL) was added to the mixture at 0 °C, then the reaction mixture was stirred at 70 °C overnight. After the completion of the reaction indicated by TLC, the reaction mixture was quenched by saturated ammonium chloride solution and was extracted by ethyl acetate for three times. The combined organic layer was dried by anhydrous sodium sulfate, which was concentrated under the reduced pressure. The resulted residue was purified through flash chromatography on silica gel (petroleum ether/ethyl acetate = 20/1) to afford the pure **1e** (1.5 g, 60% yield) as a brown solid; m.p. 154.3 – 154.6 °C; <sup>1</sup>H NMR (400 MHz, CDCl<sub>3</sub>) δ 8.07 (s, 1H), 7.48 – 7.42 (m, 2H), 7.38 (s, 1H), 7.35 – 7.26 (m, 3H), 7.16 (d, *J* = 8.4 Hz, 1H), 6.99 (d, *J* = 8.4 Hz, 1H), 6.42 (s, 1H), 2.43 (s, 3H), 2.30 (s, 1H), 2.01 (s, 3H); <sup>13</sup>C NMR (100 MHz, CDCl<sub>3</sub>) δ 145.9, 144.1, 134.3, 129.1, 128.3, 128.2, 127.4, 125.3, 123.7, 120.2, 110.6, 99.2, 73.4, 30.9, 21.4; IR (KBr): 3852, 3438, 3025, 2918, 1669, 1447, 1312, 1293, 1026, 738 cm<sup>-1</sup>; ESI FTMS exact mass calcd for (C<sub>17</sub>H<sub>17</sub>NO+Na)<sup>+</sup> requires m/z 274.1202, found m/z 274.1201.

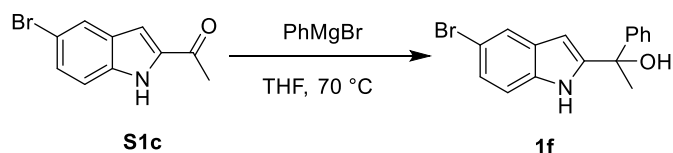

**Typical Procedure A:** Under argon atmosphere, PhMgBr (7.1 mL, 2.8 mol/L in THF) was added to a flame-dried Schlenk bottle. The solution of **S1c** (2.37 g, 10 mmol) in anhydrous THF (20 mL) was added to the mixture at 0 °C, then the reaction mixture was stirred at 70 °C overnight. After the completion of the reaction indicated by TLC, the reaction mixture was quenched by saturated ammonium chloride solution and was extracted by ethyl acetate for three times. The combined organic layer was dried by anhydrous sodium sulfate, which was concentrated under the reduced pressure. The resulted residue was purified through flash chromatography on silica gel (petroleum ether/ethyl acetate = 20/1) to afford the pure **1f** (2.3 g, 73% yield); brown solid; m.p. 92.4 – 93.3 °C; <sup>1</sup>H NMR (400 MHz, CDCl<sub>3</sub>) δ 8.29 (s, 1H), 7.71 (s, 1H), 7.45 – 7.39 (m, 2H), 7.36 – 7.27 (m, 3H), 7.23 (d, *J* = 8.4 Hz, 1H), 7.09 (d, *J* = 8.4 Hz, 1H), 6.40 (s, 1H), 2.48 (s, 1H), 1.99 (s, 3H); <sup>13</sup>C NMR

(100 MHz, CDCl<sub>3</sub>) δ 145.5, 145.4, 134.5, 129.7, 128.6, 128.5, 128.4, 127.6, 125.2, 124.9, 123.1, 112.4, 99.2, 73.3, 30.8; IR (KBr): 3649, 3420, 2978, 1749, 1576, 1446, 1405, 1305, 1050, 700 cm<sup>-1</sup>; ESI FTMS exact mass calcd for (C<sub>16</sub>H<sub>14</sub>BrNO+H)<sup>+</sup> requires m/z 316.0332, found m/z 316.0351.

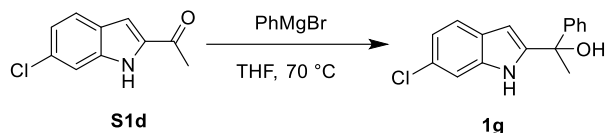

**Typical Procedure A:** Under argon atmosphere, PhMgBr (7.1 mL, 2.8 mol/L in THF) was added to a flame-dried Schlenk bottle. The solution of **S1d** (1.93 g, 10 mmol) in anhydrous THF (20 mL) was added to the mixture at 0 °C, then the reaction mixture was stirred at 70 °C overnight. After the completion of the reaction indicated by TLC, the reaction mixture was quenched by saturated ammonium chloride solution and was extracted by ethyl acetate for three times. The combined organic layer was dried by anhydrous sodium sulfate, which was concentrated under the reduced pressure. The resulted residue was purified through flash chromatography on silica gel (petroleum ether/ethyl acetate = 20/1) to afford the pure **1g** (1.6 g, 59% yield); brown solid; m.p. 100.4 – 100.7 °C; <sup>1</sup>H NMR (400 MHz, CDCl<sub>3</sub>) δ 8.14 (s, 1H), 7.60 (d, *J* = 8.0 Hz, 1H), 7.43 – 7.36 (m, 2H), 7.32 – 7.27 (m, 3H), 7.21 – 7.14 (m, 1H), 7.15 – 7.07 (m, 1H), 6.49 (s, 1H), 2.29 (s, 1H), 2.00 (s, 3H); <sup>13</sup>C NMR (100 MHz, CDCl<sub>3</sub>) δ 144.4, 143.5, 136.1, 133.3, 128.4, 127.9, 126.9, 122.4, 120.7, 120.0, 111.0, 99.9, 73.1, 31.0; IR (KBr): 3745, 3056, 1701, 1610, 1508, 1447, 1321, 1240, 1061, 699 cm<sup>-1</sup>; ESI FTMS exact mass calcd for (C<sub>16</sub>H<sub>14</sub>ClNO-H)<sup>-</sup> requires m/z 270.0691, found m/z 270.0706.

#### Synthesis of substrate **8**:

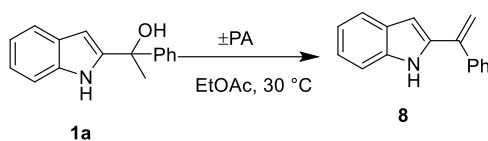

2-Indole methanol **1a** (47.4 mg, 0.2 mmol), 1,1'-Binaphthyl-2,2'-diyl hydrogenphosphate (7.0 mg, 0.1 mmol) were added to a reaction tube. Then, ethyl acetate (2 mL) was added to the reaction mixture, which was stirred at 30 °C for 1 h. After the completion of the reaction which was indicated by TLC, the reaction mixture was concentrated under reduced pressure and the residue was purified through flash column chromatography (petroleum ether/dichloromethane = 2:1) on silica gel to afford pure compound **8** in 98% yield (42.9 mg); <sup>1</sup>H NMR (400 MHz, CDCl<sub>3</sub>) δ 8.12 (s, 1H), 7.59 (d, *J* = 7.9 Hz, 1H), 7.54 – 7.48 (m, 2H), 7.45 – 7.39 (m, 3H), 7.34 (d, *J* = 8.1 Hz, 1H), 7.24 – 7.18 (m, 1H), 7.15 – 7.09 (m, 1H), 6.53 (s, 1H), 5.62 (s, 1H), 5.39 (s, 1H); <sup>13</sup>C NMR (100 MHz, CDCl<sub>3</sub>) δ 141.7,

140.1, 137.8, 136.5, 128.7, 128.6, 128.4, 128.3, 122.7, 120.9, 120.2, 112.8, 110.8, 103.4; ESI FTMS exact mass calcd for (C<sub>16</sub>H<sub>13</sub>NO+H)<sup>+</sup> requires m/z 220.1121, found m/z 220.1110.

### 3. General procedure for the synthesis of products 3

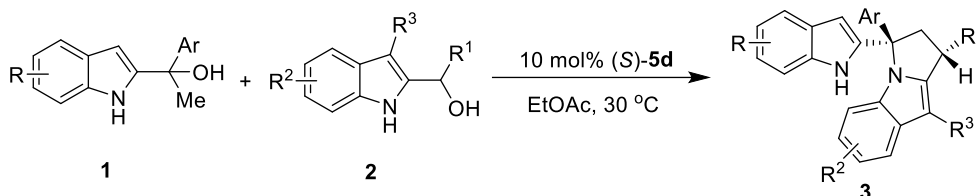

Methyl-substituted 2-indolylmethanol **1** (0.1 mmol), 3-alkyl(aryl)-2-indolylmethanol **2** (0.2 mmol), and catalyst (*S*)-**5d** (0.01 mmol) were added to a reaction tube. Then, ethyl acetate (1 mL) was added to the reaction mixture, which was stirred at 30 °C for 5 h. After the completion of the reaction which was indicated by TLC, the reaction mixture was directly purified through preparative thin layer chromatography on silica gel to afford pure products **3**.

### 4. Synthetic procedures and characterization data of products 3

**(1*R*,3*R*)-3-(1*H*-indol-2-yl)-9-methyl-3-phenyl-1-(*o*-tolyl)-2,3-dihydro-1*H*-pyrrolo[1,2-*a*]indole (3aa):**

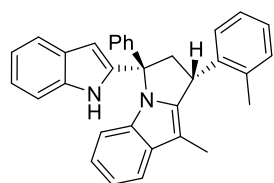

Following the general procedure, methyl-substituted 2-indolylmethanol **1a** (23.7 mg, 0.1 mmol), 3-alkyl(aryl)-2-indolylmethanol **2a** (50.2 mg, 0.2 mmol), catalyst (*S*)-**5d** (7.1 mg, 0.01 mmol) were added to a reaction tube. Then, EtOAc (1 mL) was added to the reaction mixture, which was stirred at 30 °C for 5 h. After the completion of the reaction which was indicated by TLC, the reaction mixture was directly purified through preparative thin layer chromatography (petroleum ether/dichloromethane = 2:1) on silica gel to afford pure compound **3aa** in 95% yield (42.9 mg) as a white solid. m.p. 122.6 – 122.9 °C; > 95:5 dr; [ $\alpha$ ]<sub>D</sub><sup>20</sup> = 39.5 (c = 0.86, acetone); <sup>1</sup>H NMR (400 MHz, CDCl<sub>3</sub>)  $\delta$  8.09 (s, 1H), 7.59 (d, *J* = 8.0 Hz, 1H), 7.55 (d, *J* = 8.0 Hz, 1H), 7.39 – 7.33 (m, 4H), 7.25 – 7.17 (m, 5H), 7.14 – 7.08 (m, 4H), 6.93 – 6.88 (m, 1H), 6.62 (d, *J* = 8.4 Hz, 1H), 6.42 (s, 1H), 4.63 – 4.56 (m, 1H), 3.61 – 3.54 (m, 1H), 3.25 – 3.14 (m, 1H), 2.36 (s, 3H), 2.00 (s, 3H); <sup>13</sup>C NMR (100 MHz, CDCl<sub>3</sub>)  $\delta$  141.6, 141.1, 139.3, 136.5, 135.9, 133.6, 132.9, 130.6, 128.6, 128.0, 127.9, 127.0, 126.9, 126.6, 122.5, 121.3, 120.8, 120.1, 119.2, 118.8, 111.2, 110.6, 104.4, 103.1, 68.0, 56.6, 38.8, 19.7, 8.7; IR (KBr):

3566, 3055, 1558, 1540, 1489, 1455, 1338, 1312, 1298, 746  $\text{cm}^{-1}$ ; ESI FTMS exact mass calcd for  $(\text{C}_{33}\text{H}_{28}\text{N}_2\text{-H})^+$  requires  $m/z$  451.2179, found  $m/z$  451.2199; The enantiomeric excess: 93%, determined by HPLC (Daicel Chiralpak IB, hexane/isopropanol = 90/10, flow rate 1.0 mL/min, T = 30  $^{\circ}\text{C}$ , 254 nm):  $t_{\text{R}}$  = 4.877 (minor),  $t_{\text{R}}$  = 11.777 (major).

**(1*R*,3*R*)-3-(1*H*-indol-2-yl)-1-(2-methoxyphenyl)-9-methyl-3-phenyl-2,3-dihydro-1*H*-pyrrolo[1,2-*a*]indole (3ab):**

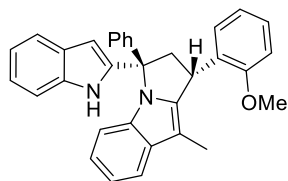

Following the general procedure, methyl-substituted 2-indolylmethanol **1a** (23.7 mg, 0.1 mmol), 3-alkyl(aryl)-2-indolylmethanol **2b** (53.4 mg, 0.2 mmol), catalyst (*S*)-**5d** (7.1 mg, 0.01 mmol) were added to a reaction tube. Then, EtOAc (1 mL) was added to the reaction mixture, which was stirred at 30  $^{\circ}\text{C}$  for 5 h. After the completion of the reaction which was indicated by TLC, the reaction mixture was directly purified through preparative thin layer chromatography (petroleum ether/dichloromethane = 2:1) on silica gel to afford pure compound **3ab** in 69% yield (32.3 mg) as a white solid. m.p. 81.5 – 82.0  $^{\circ}\text{C}$ ; > 95:5 dr;  $[\alpha]_{\text{D}}^{20}$  = 37.3 ( $c$  = 0.65, acetone);  $^1\text{H}$  NMR (400 MHz,  $\text{CDCl}_3$ )  $\delta$  8.17 (s, 1H), 7.57 – 7.52 (m, 2H), 7.38 – 7.32 (m, 3H), 7.31 – 7.26 (m, 2H), 7.21 (d,  $J$  = 8.0 Hz, 1H), 7.17 – 7.12 (m, 1H), 7.12 – 7.03 (m, 4H), 6.97 – 6.85 (m, 3H), 6.63 (d,  $J$  = 8.0 Hz, 1H), 6.39 (s, 1H), 4.80 – 4.72 (m, 1H), 3.81 (s, 3H), 3.61 – 3.53 (m, 1H), 3.37 – 3.27 (m, 1H), 2.00 (s, 3H);  $^{13}\text{C}$  NMR (100 MHz,  $\text{CDCl}_3$ )  $\delta$  157.3, 141.6, 141.5, 139.9, 136.4, 133.6, 132.7, 129.1, 128.8, 128.4, 128.1, 127.8, 127.7, 126.9, 122.3, 120.9, 120.7, 119.9, 119.0, 118.5, 111.1, 111.0, 110.6, 104.0, 102.5, 67.9, 56.0, 55.7, 36.3, 8.5; IR (KBr): 3392, 3055, 2961, 2836, 1491, 1455, 1338, 1242, 1028, 746  $\text{cm}^{-1}$ ; ESI FTMS exact mass calcd for  $(\text{C}_{33}\text{H}_{28}\text{N}_2\text{O-H})^+$  requires  $m/z$  467.2129, found  $m/z$  467.2134; The enantiomeric excess: 90%, determined by HPLC (Daicel Chiralpak IB, hexane/isopropanol = 90/10, flow rate 1.0 mL/min, T = 30  $^{\circ}\text{C}$ , 254 nm):  $t_{\text{R}}$  = 5.526 (minor),  $t_{\text{R}}$  = 7.033 (major).

**(1*R*,3*R*)-3-(1*H*-indol-2-yl)-1-(3-methoxyphenyl)-9-methyl-3-phenyl-2,3-dihydro-1*H*-pyrrolo[1,2-*a*]indole (3ac):**

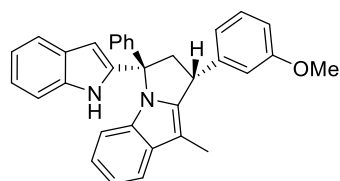

Following the general procedure, methyl-substituted 2-indolylmethanol **1a** (23.7 mg, 0.1 mmol), 3-alkyl(aryl)-2-indolylmethanol **2c** (53.4 mg, 0.2 mmol), catalyst (*S*)-**5d** (7.1 mg, 0.01 mmol) were added to a reaction tube. Then, EtOAc (1 mL)



was added to the reaction mixture, which was stirred at 30 °C for 5 h. After the completion of the reaction which was indicated by TLC, the reaction mixture was directly purified through preparative thin layer chromatography (petroleum ether/dichloromethane = 2:1) on silica gel to afford pure compound **3ac** in 92% yield (43.1 mg) as a white solid. m.p. 117.6 – 118.2 °C; > 95:5 dr;  $[\alpha]_D^{20} = 42.9$  (c = 0.86, acetone);  $^1\text{H NMR}$  (400 MHz,  $\text{CDCl}_3$ )  $\delta$  8.12 (s, 1H), 7.60 – 7.53 (m, 2H), 7.40 – 7.33 (m, 3H), 7.31 – 7.27 (m, 1H), 7.24 (s, 1H), 7.21 – 7.15 (m, 1H), 7.14 – 7.03 (m, 4H), 6.94 (d,  $J = 7.6$  Hz, 1H), 6.92 – 6.87 (m, 2H), 6.86 – 6.81 (m, 1H), 6.57 (d,  $J = 8.0$  Hz, 1H), 6.44 (s, 1H), 4.35 – 4.28 (m, 1H), 3.77 (s, 3H), 3.56 – 3.49 (m, 1H), 3.30 – 3.22 (m, 1H), 2.00 (s, 3H);  $^{13}\text{C NMR}$  (100 MHz,  $\text{CDCl}_3$ )  $\delta$  160.0, 142.5, 141.4, 140.9, 139.1, 136.5, 133.5, 132.9, 129.8, 128.6, 128.1, 128.0, 127.0, 122.6, 121.4, 120.9, 120.5, 120.2, 119.2, 118.9, 113.7, 112.4, 111.2, 110.5, 104.5, 103.4, 68.0, 58.4, 55.3, 42.3, 8.6; IR (KBr): 3648, 3054, 2935, 1599, 1490, 1455, 1337, 1264, 1155, 741  $\text{cm}^{-1}$ ; ESI FTMS exact mass calcd for  $(\text{C}_{33}\text{H}_{28}\text{N}_2\text{O}-\text{H})^-$  requires  $m/z$  467.2129, found  $m/z$  467.2148; The enantiomeric excess: 94%, determined by HPLC (Daicel Chiralpak IB, hexane/isopropanol = 90/10, flow rate 1.0 mL/min, T = 30 °C, 254 nm):  $t_R = 5.437$  (minor),  $t_R = 9.803$  (major).

**(1*R*,3*R*)-3-(1*H*-indol-2-yl)-9-methyl-3-phenyl-1-(*m*-tolyl)-2,3-dihydro-1*H*-pyrrolo[1,2-*a*]indole (**3ad**):**

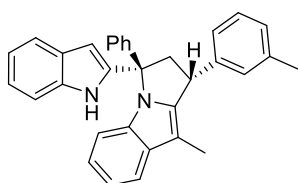

Following the general procedure, methyl-substituted 2-indolylmethanol **1a** (23.7 mg, 0.1 mmol), 3-alkyl(aryl)-2-indolylmethanol **2d** (50.2 mg, 0.2 mmol), catalyst (*S*)-**5d** (7.1 mg, 0.01 mmol) were added to a reaction tube. Then, EtOAc (1 mL) was added to the reaction mixture, which was stirred at 30 °C for 5 h. After the completion of the reaction which was indicated by TLC, the reaction mixture was directly purified through preparative thin layer chromatography (petroleum ether/dichloromethane = 2:1) on silica gel to afford pure compound **3ad** in 90% yield (40.7 mg) as a white solid. m.p. 70.4 – 71.1 °C; > 95:5 dr;  $[\alpha]_D^{20} = 36.2$  (c = 0.81, acetone);  $^1\text{H NMR}$  (400 MHz,  $\text{CDCl}_3$ )  $\delta$  8.12 (s, 1H), 7.60 – 7.53 (m, 2H), 7.39 – 7.31 (m, 3H), 7.27 (s, 1H), 7.25 – 7.23 (m, 1H), 7.20 – 7.13 (m, 3H), 7.13 – 7.04 (m, 5H), 6.92 – 6.86 (m, 1H), 6.57 (d,  $J = 8.0$  Hz, 1H), 6.44 (s, 1H), 4.33 – 4.26 (m, 1H), 3.55 – 3.47 (m, 1H), 3.30 – 3.20 (m, 1H), 2.33 (s, 3H), 1.97 (s, 3H);  $^{13}\text{C NMR}$  (100 MHz,  $\text{CDCl}_3$ )  $\delta$  141.7, 140.9, 140.8, 139.2, 138.5, 136.5, 133.5, 132.8, 128.8, 128.7, 128.6, 128.1, 128.0, 127.9, 127.0, 125.1, 122.6, 121.4,

120.9, 120.2, 119.2, 118.8, 111.2, 110.5, 104.5, 103.3, 68.0, 58.5, 42.1, 21.5, 8.5; IR (KBr): 3440, 3382, 3052, 2916, 2862, 1606, 1455, 1338, 1010, 740  $\text{cm}^{-1}$ ; ESI FTMS exact mass calcd for  $(\text{C}_{33}\text{H}_{28}\text{N}_2\text{-H})^+$  requires  $m/z$  451.2179, found  $m/z$  451.2202; The enantiomeric excess: 94%, determined by HPLC (Daicel Chiralpak IB, hexane/isopropanol = 90/10, flow rate 1.0 mL/min, T = 30  $^{\circ}\text{C}$ , 254 nm):  $t_{\text{R}}$  = 4.433 (minor),  $t_{\text{R}}$  = 5.557 (major).

**(1*R*,3*R*)-1-(3-fluorophenyl)-3-(1*H*-indol-2-yl)-9-methyl-3-phenyl-2,3-dihydro-1*H*-pyrrolo[1,2-*a*]indole (3ae):**

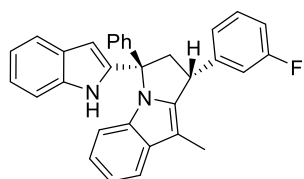

Following the general procedure, methyl-substituted 2-indolylmethanol **1a** (23.7 mg, 0.1 mmol), 3-alkyl(aryl)-2-indolylmethanol **2e** (51.0 mg, 0.2 mmol), catalyst (*S*)-**5d** (7.1 mg, 0.01 mmol) were added to a reaction tube. Then, EtOAc (1 mL) was added to the reaction mixture, which was stirred at 30  $^{\circ}\text{C}$  for 5 h. After the completion of the reaction which was indicated by TLC, the reaction mixture was directly purified through preparative thin layer chromatography (petroleum ether/dichloromethane = 2:1) on silica gel to afford pure compound **3ae** in 53% yield (24.2 mg) as a white solid. m.p. 77.9 – 78.4  $^{\circ}\text{C}$ ; > 95:5 dr;  $[\alpha]_{\text{D}}^{20}$  = 1.7 (c = 0.48, acetone);  $^1\text{H}$  NMR (400 MHz,  $\text{CDCl}_3$ )  $\delta$  8.10 (s, 1H), 7.60 – 7.54 (m, 2H), 7.40 – 7.26 (m, 5H), 7.21 – 7.17 (m, 1H), 7.15 – 7.08 (m, 3H), 7.08 – 7.04 (m, 3H), 7.03 – 6.96 (m, 1H), 6.93 – 6.87 (m, 1H), 6.57 (d,  $J$  = 8.0 Hz, 1H), 6.47 – 6.41 (m, 1H), 4.37 – 4.30 (m, 1H), 3.58 – 3.50 (m, 1H), 3.30 – 3.20 (m, 1H), 1.99 (s, 3H);  $^{13}\text{C}$  NMR (100 MHz,  $\text{CDCl}_3$ )  $\delta$  163.2 (d,  $J$  = 244.7 Hz), 143.6, 143.5, 140.7 (d,  $J$  = 15.2 Hz), 138.8, 136.5, 133.4, 132.9, 130.3 (d,  $J$  = 8.3 Hz), 128.6, 128.1, 127.9, 126.9, 123.7 (d,  $J$  = 2.7 Hz), 122.6, 121.6, 120.9, 120.2, 119.3, 118.9, 114.9 (d,  $J$  = 21.6 Hz), 114.1 (d,  $J$  = 21.0 Hz), 111.2, 110.5, 104.5, 103.5, 67.9, 58.3, 41.9, 8.5;  $^{19}\text{F}$  NMR (376 MHz,  $\text{CDCl}_3$ )  $\delta$  -112.7; IR (KBr): 3648, 3308, 3056, 2926, 1699, 1616, 1521, 1456, 1263, 747  $\text{cm}^{-1}$ ; ESI FTMS exact mass calcd for  $(\text{C}_{32}\text{H}_{25}\text{FN}_2\text{-H})^+$  requires  $m/z$  455.1929, found  $m/z$  455.1938; The enantiomeric excess: 92%, determined by HPLC (Daicel Chiralpak IB, hexane/isopropanol = 90/10, flow rate 1.0 mL/min, T = 30  $^{\circ}\text{C}$ , 254 nm):  $t_{\text{R}}$  = 4.500 (minor),  $t_{\text{R}}$  = 6.397 (major).

**(1*R*,3*R*)-1-(3-chlorophenyl)-3-(1*H*-indol-2-yl)-9-methyl-3-phenyl-2,3-dihydro-1*H*-pyrrolo[1,2-*a*]indole (3af):**

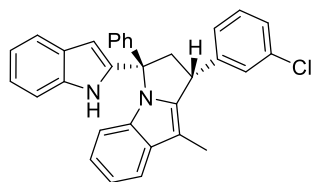

Following the general procedure, methyl-substituted 2-indolylmethanol **1a** (23.7 mg, 0.1 mmol), 3-alkyl(aryl)-2-indolylmethanol **2f** (54.2 mg, 0.2 mmol), catalyst (*S*)-**5d** (7.1 mg, 0.01 mmol) were added to a reaction tube. Then, EtOAc (1 mL) was added to the reaction mixture, which was stirred at 30 °C for 5 h. After the completion of the reaction which was indicated by TLC, the reaction mixture was directly purified through preparative thin layer chromatography (petroleum ether/dichloromethane = 2:1) on silica gel to afford pure compound **3af** in 57% yield (26.9 mg) as a white solid. m.p. 101.9 – 102.8 °C; > 95:5 dr;  $[\alpha]_{\text{D}}^{20} = 20.3$  (c = 0.54, acetone);  $^1\text{H NMR}$  (400 MHz,  $\text{CDCl}_3$ )  $\delta$  8.11 (s, 1H), 7.60 – 7.54 (m, 2H), 7.39 – 7.33 (m, 4H), 7.30 – 7.26 (m, 3H), 7.23 – 7.16 (m, 2H), 7.14 – 7.07 (m, 2H), 7.07 – 7.02 (m, 2H), 6.94 – 6.86 (m, 1H), 6.56 (d,  $J = 8.0$  Hz, 1H), 6.44 (s, 1H), 4.34 – 4.28 (m, 1H), 3.57 – 3.47 (m, 1H), 3.29 – 3.16 (m, 1H), 1.99 (s, 3H);  $^{13}\text{C NMR}$  (100 MHz,  $\text{CDCl}_3$ )  $\delta$  143.0, 140.7, 140.6, 138.8, 136.5, 134.7, 133.4, 132.9, 130.1, 128.6, 128.1, 127.9, 127.4, 126.9, 126.3, 122.7, 121.7, 120.9, 120.2, 119.3, 119.0, 111.2, 110.5, 104.6, 103.6, 68.0, 58.4, 41.9, 8.6; IR (KBr): 3734, 3056, 2917, 1596, 1521, 1455, 1338, 1311, 1010, 739  $\text{cm}^{-1}$ ; ESI FTMS exact mass calcd for  $(\text{C}_{32}\text{H}_{25}\text{ClN}_2\text{-H})^+$  requires  $m/z$  471.1633, found  $m/z$  471.1625; The enantiomeric excess: 94%, determined by HPLC (Daicel Chiralpak IB, hexane/isopropanol = 90/10, flow rate 1.0 mL/min, T = 30 °C, 254 nm):  $t_{\text{R}} = 4.900$  (minor),  $t_{\text{R}} = 7.373$  (major).

**(1*R*,3*R*)-3-(1*H*-indol-2-yl)-9-methyl-3-phenyl-1-(*p*-tolyl)-2,3-dihydro-1*H*-pyrrolo[1,2-*a*]indole**

**(3ag):**

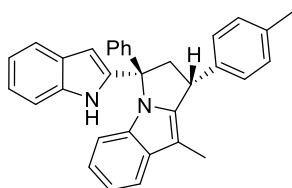

Following the general procedure, methyl-substituted 2-indolylmethanol **1a** (23.7 mg, 0.1 mmol), 3-alkyl(aryl)-2-indolylmethanol **2g** (50.2 mg, 0.2 mmol), catalyst (*S*)-**5d** (7.1 mg, 0.01 mmol) were added to a reaction tube. Then, EtOAc (1 mL) was added to the reaction mixture, which was stirred at 30 °C for 5 h. After the completion of the reaction which was indicated by TLC, the reaction mixture was directly purified through preparative thin layer chromatography (petroleum ether/dichloromethane = 2:1) on silica gel to afford pure compound **3ag** in 80% yield (36.2 mg) as a white solid. m.p. 89.2 – 90.5 °C; > 95:5 dr;  $[\alpha]_{\text{D}}^{20} = 27.1$  (c = 0.72, acetone);  $^1\text{H NMR}$  (400 MHz,  $\text{CDCl}_3$ )  $\delta$  8.11 (s, 1H), 7.61 – 7.52 (m, 2H), 7.39 – 7.32 (m, 3H), 7.26 – 7.22 (m, 3H), 7.21 – 7.15 (m, 3H), 7.15 – 7.05 (m, 4H), 6.92 – 6.85 (m, 1H), 6.57 (d,  $J = 8.4$  Hz, 1H), 6.45 (s, 1H), 4.34 – 4.27 (m, 1H), 3.57 – 3.46 (m, 1H), 3.30 – 3.19 (m, 1H),

2.38 (s, 3H), 1.97 (s, 3H);  $^{13}\text{C}$  NMR (100 MHz,  $\text{CDCl}_3$ )  $\delta$  141.7, 140.8, 139.2, 137.7, 136.7, 136.5, 133.4, 132.8, 129.5, 128.5, 128.0, 127.9, 126.9, 122.5, 121.3, 120.8, 120.1, 119.1, 118.7, 111.1, 110.4, 104.4, 103.2, 67.9, 58.6, 41.8, 21.1, 8.4; IR (KBr): 3648, 3050, 2916, 2862, 1699, 1558, 1455, 1339, 1299, 748  $\text{cm}^{-1}$ ; ESI FTMS exact mass calcd for  $(\text{C}_{33}\text{H}_{28}\text{N}_2\text{-H})^-$  requires  $m/z$  451.2179, found  $m/z$  451.2179; The enantiomeric excess: 85%, determined by HPLC (Daicel Chiralpak IB, hexane/isopropanol = 90/10, flow rate 1.0 mL/min,  $T = 30^\circ\text{C}$ , 254 nm):  $t_{\text{R}} = 4.350$  (minor),  $t_{\text{R}} = 4.953$  (major).

**(1*R*,3*R*)-1-(4-chlorophenyl)-3-(1*H*-indol-2-yl)-9-methyl-3-phenyl-2,3-dihydro-1*H*-pyrrolo[1,2-*a*]indole (3ah):**

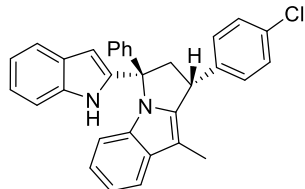

Following the general procedure, methyl-substituted 2-indolylmethanol **1a** (23.7 mg, 0.1 mmol), 3-alkyl(aryl)-2-indolylmethanol **2h** (54.2 mg, 0.2 mmol), catalyst (*S*)-**5d** (7.1 mg, 0.01 mmol) were added to a reaction tube. Then, EtOAc (1 mL) was added to the reaction mixture, which was stirred at  $30^\circ\text{C}$  for 5 h. After the completion of the reaction which was indicated by TLC, the reaction mixture was directly purified through preparative thin layer chromatography (petroleum ether/dichloromethane = 2:1) on silica gel to afford pure compound **3ah** in 78% yield (36.8 mg) as a white solid. m.p.  $98.7 - 99.9^\circ\text{C}$ ;  $> 95:5$  dr;  $[\alpha]_{\text{D}}^{20} = 3.5$  ( $c = 0.74$ , acetone);  $^1\text{H}$  NMR (400 MHz,  $\text{CDCl}_3$ )  $\delta$  8.10 (s, 1H), 7.61 – 7.53 (m, 2H), 7.39 – 7.31 (m, 5H), 7.31 – 7.27 (m, 2H), 7.25 (s, 1H), 7.22 – 7.16 (m, 1H), 7.15 – 7.07 (m, 2H), 7.07 – 7.01 (m, 2H), 6.93 – 6.86 (m, 1H), 6.57 (d,  $J = 8.4$  Hz, 1H), 6.45 (s, 1H), 4.37 – 4.26 (m, 1H), 3.56 – 3.47 (m, 1H), 3.28 – 3.15 (m, 1H), 1.97 (s, 3H);  $^{13}\text{C}$  NMR (100 MHz,  $\text{CDCl}_3$ )  $\delta$  141.0, 140.6, 139.4, 138.8, 136.5, 133.4, 132.9, 132.8, 129.3, 129.0, 128.6, 128.1, 127.9, 126.9, 122.6, 121.6, 120.8, 120.2, 119.3, 118.9, 111.1, 110.5, 104.5, 103.4, 67.9, 58.4, 41.6, 8.5; IR (KBr): 3734, 3056, 1733, 1489, 1456, 1338, 1262, 1089, 1013, 747  $\text{cm}^{-1}$ ; ESI FTMS exact mass calcd for  $(\text{C}_{32}\text{H}_{25}\text{ClN}_2\text{-H})^-$  requires  $m/z$  471.1633, found  $m/z$  471.1633; The enantiomeric excess: 81%, determined by HPLC (Daicel Chiralpak IB, hexane/isopropanol = 90/10, flow rate 1.0 mL/min,  $T = 30^\circ\text{C}$ , 254 nm):  $t_{\text{R}} = 4.866$  (minor),  $t_{\text{R}} = 6.276$  (major).

**(1*R*,3*R*)-3-(1*H*-indol-2-yl)-9-methyl-1-(naphthalen-1-yl)-3-phenyl-2,3-dihydro-1*H*-pyrrolo[1,2-*a*]indole (3ai):**

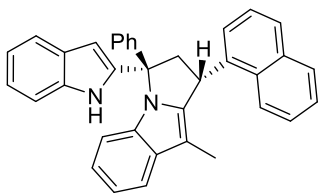

Following the general procedure, methyl-substituted 2-indolylmethanol **1a** (23.7 mg, 0.1 mmol), 3-alkyl(aryl)-2-indolylmethanol **2i** (57.4 mg, 0.2 mmol), catalyst (*S*)-**5d** (7.1 mg, 0.01 mmol) were added to a reaction tube. Then, EtOAc (1 mL) was added to the reaction mixture, which was stirred at 30 °C for 5 h. After the completion of the reaction which was indicated by TLC, the reaction mixture was directly purified through preparative thin layer chromatography (petroleum ether/dichloromethane = 2:1) on silica gel to afford pure compound **3ai** in 84% yield (41.0 mg) as a white solid. m.p. 142.6 – 142.9 °C; > 95:5 dr;  $[\alpha]_D^{20} = 114.1$  (c = 0.82, acetone);  $^1\text{H NMR}$  (400 MHz,  $\text{CDCl}_3$ )  $\delta$  8.09 (s, 1H), 8.04 – 7.96 (m, 1H), 7.96 – 7.88 (m, 1H), 7.80 (d,  $J = 8.0$  Hz, 1H), 7.63 (d,  $J = 8.0$  Hz, 1H), 7.58 – 7.48 (m, 4H), 7.44 – 7.35 (m, 4H), 7.22 – 7.05 (m, 6H), 6.99 – 6.90 (m, 1H), 6.69 (d,  $J = 8.4$  Hz, 1H), 6.35 (s, 1H), 5.37 – 5.06 (m, 1H), 3.89 – 3.64 (m, 1H), 3.48 – 3.11 (m, 1H), 2.06 (s, 3H);  $^{13}\text{C NMR}$  (100 MHz,  $\text{CDCl}_3$ )  $\delta$  141.3, 141.1, 139.1, 136.3, 133.7, 133.0, 131.5, 129.1, 128.7, 128.0, 127.8, 126.9, 126.3, 125.7, 122.4, 121.3, 120.8, 120.0, 119.3, 118.9, 111.1, 110.7, 104.2, 103.6, 68.1, 57.4, 30.6, 9.0; IR (KBr): 3441, 3054, 2914, 1558, 1540, 1455, 1396, 1338, 1302, 746  $\text{cm}^{-1}$ ; ESI FTMS exact mass calcd for  $(\text{C}_{36}\text{H}_{28}\text{N}_2\text{-H})^-$  requires  $m/z$  487.2179, found  $m/z$  487.2176; The enantiomeric excess: 93%, determined by HPLC (Daicel Chiralpak IB, hexane/isopropanol = 90/10, flow rate 1.0 mL/min, T = 30 °C, 254 nm):  $t_{\text{R}} = 6.717$  (minor),  $t_{\text{R}} = 20.137$  (major).

**(1S,3R)-3-(1H-indol-2-yl)-9-methyl-3-phenyl-1-(thiophen-2-yl)-2,3-dihydro-1H-pyrrolo[1,2-a]indole (3aj):**

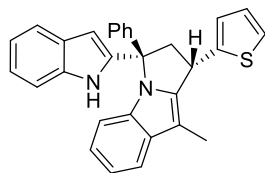

Following the general procedure, methyl-substituted 2-indolylmethanol **1a** (23.7 mg, 0.1 mmol), 3-alkyl(aryl)-2-indolylmethanol **2j** (48.6 mg, 0.2 mmol), catalyst (*S*)-**5d** (7.1 mg, 0.01 mmol) were added to a reaction tube. Then, EtOAc (1 mL) was added to the reaction mixture, which was stirred at 30 °C for 5 h. After the completion of the reaction which was indicated by TLC, the reaction mixture was directly purified through preparative thin layer chromatography (petroleum ether/dichloromethane = 2:1) on silica gel to afford pure compound **3aj** in 93% yield (41.3 mg) as a white solid. m.p. 123.6 – 124.0 °C; > 95:5 dr;  $[\alpha]_D^{20} = 12.7$  (c = 0.83, acetone);  $^1\text{H NMR}$  (400 MHz,  $\text{CDCl}_3$ )  $\delta$  8.12 (s, 1H), 7.60 – 7.54 (m, 2H), 7.39 – 7.32 (m, 3H), 7.26 – 7.22 (m, 2H), 7.20 – 7.16 (m, 1H), 7.14 – 7.04 (m, 4H), 7.02 – 6.96 (m, 2H), 6.93 – 6.84 (m, 1H), 6.55 (d,  $J = 8.0$  Hz, 1H), 6.43 (s, 1H), 4.73 – 4.63 (m,

1H), 3.63 – 3.53 (m, 1H), 3.40 – 3.31 (m, 1H), 2.08 (s, 3H); <sup>13</sup>C NMR (100 MHz, CDCl<sub>3</sub>) δ 144.6, 140.9, 140.6, 138.8, 136.5, 133.4, 132.6, 128.5, 128.0, 127.8, 126.9, 126.7, 125.4, 124.5, 122.5, 121.6, 120.8, 120.1, 119.2, 118.9, 111.2, 110.5, 104.5, 103.8, 67.7, 58.9, 37.3, 8.4; IR (KBr): 3648, 3566, 3055, 2915, 1683, 1558, 1455, 1338, 1303, 745 cm<sup>-1</sup>; ESI FTMS exact mass calcd for (C<sub>30</sub>H<sub>24</sub>N<sub>2</sub>S-H)<sup>-</sup> requires m/z 443.1587, found m/z 443.1584; The enantiomeric excess: 85%, determined by HPLC (Daicel Chiralpak IB, hexane/isopropanol = 90/10, flow rate 1.0 mL/min, T = 30 °C, 254 nm): t<sub>R</sub> = 5.356 (minor), t<sub>R</sub> = 6.566 (major).

**(1R,3R)-1-cyclohexyl-3-(1H-indol-2-yl)-9-methyl-3-phenyl-2,3-dihydro-1H-pyrrolo[1,2-a]indole (3ak):**

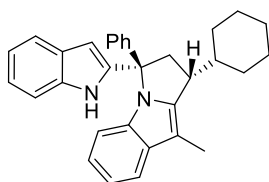

Following the general procedure, methyl-substituted 2-indolylmethanol **1a** (23.7 mg, 0.1 mmol), 3-alkyl(aryl)-2-indolylmethanol **2k** (48.6 mg, 0.2 mmol), catalyst (*S*)-**5d** (7.1 mg, 0.01 mmol) were added to a reaction tube.

Then, EtOAc (1 mL) was added to the reaction mixture, which was stirred at 30 °C for 5 h. After the completion of the reaction which was indicated by TLC, the reaction mixture was directly purified through preparative thin layer chromatography (petroleum ether/dichloromethane = 2:1) on silica gel to afford pure compound **3ak** in 95% yield (42.2 mg) as a white solid. m.p. 117.7 – 118.3 °C; > 95:5 dr; [α]<sub>D</sub><sup>20</sup> = 16.7 (c = 0.84, acetone); <sup>1</sup>H NMR (400 MHz, CDCl<sub>3</sub>) δ 8.03 (s, 1H), 7.62 – 7.56 (m, 2H), 7.34 – 7.28 (m, 3H), 7.24 – 7.21 (m, 1H), 7.21 – 7.11 (m, 2H), 7.09 – 7.04 (m, 1H), 7.04 – 6.98 (m, 2H), 6.87 – 6.78 (m, 1H), 6.53 – 6.45 (m, 2H), 3.30 – 3.22 (m, 1H), 3.20 – 3.12 (m, 1H), 3.11 – 3.03 (m, 1H), 2.38 (s, 3H), 2.22 – 2.10 (m, 1H), 1.82 – 1.68 (m, 4H), 1.38 – 1.07 (m, 6H); <sup>13</sup>C NMR (100 MHz, CDCl<sub>3</sub>) δ 141.7, 141.4, 140.2, 136.4, 133.6, 132.6, 128.3, 128.0, 127.7, 126.9, 122.3, 120.9, 120.7, 120.1, 118.9, 118.3, 111.1, 110.3, 103.8, 102.2, 67.5, 49.3, 42.0, 38.3, 32.0, 27.7, 26.8, 26.6, 26.5, 8.9; IR (KBr): 3437, 3377, 3055, 2923, 2851, 1455, 1339, 1313, 1237, 739 cm<sup>-1</sup>; ESI FTMS exact mass calcd for (C<sub>32</sub>H<sub>32</sub>N<sub>2</sub>-H)<sup>-</sup> requires m/z 443.2492, found m/z 443.2490; The enantiomeric excess: 93%, determined by HPLC (Daicel Chiralpak IB, hexane/isopropanol = 90/10, flow rate 1.0 mL/min, T = 30 °C, 254 nm): t<sub>R</sub> = 4.426 (minor), t<sub>R</sub> = 7.963 (major).

**(1R,3R)-3-(1H-indol-2-yl)-1-isopropyl-9-methyl-3-phenyl-2,3-dihydro-1H-pyrrolo[1,2-a]indole (3al):**

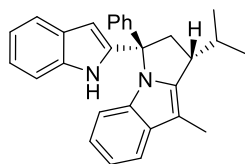

Following the general procedure, methyl-substituted 2-indolylmethanol **1a** (23.7 mg, 0.1 mmol), 3-alkyl(aryl)-2-indolylmethanol **2l** (40.6 mg, 0.2 mmol), catalyst (*S*)-**5d** (7.1 mg, 0.01 mmol) were added to a reaction tube.

Then, EtOAc (1 mL) was added to the reaction mixture, which was stirred at 30 °C for 5 h. After the completion of the reaction which was indicated by TLC, the reaction mixture was directly purified through preparative thin layer chromatography (petroleum ether/dichloromethane = 2:1) on silica gel to afford pure compound **3al** in 91% yield (36.8 mg) as a white solid. m.p. 98.4 – 98.7 °C; > 95:5 dr;  $[\alpha]_D^{20} = 15.8$  ( $c = 0.74$ , acetone);  $^1\text{H NMR}$  (400 MHz,  $\text{CDCl}_3$ )  $\delta$  8.04 (s, 1H), 7.63 – 7.56 (m, 2H), 7.34 – 7.27 (m, 3H), 7.25 – 7.21 (m, 1H), 7.21 – 7.16 (m, 1H), 7.16 – 7.11 (m, 1H), 7.10 – 7.05 (m, 1H), 7.03 – 6.98 (m, 2H), 6.89 – 6.82 (m, 1H), 6.52 – 6.46 (m, 2H), 3.31 – 3.22 (m, 1H), 3.17 – 3.02 (m, 2H), 2.59 – 2.47 (m, 1H), 2.38 (s, 3H), 1.02 (d,  $J = 6.8$  Hz, 6H);  $^{13}\text{C NMR}$  (100 MHz,  $\text{CDCl}_3$ )  $\delta$  142.3, 141.5, 140.1, 136.3, 133.6, 132.5, 128.3, 128.0, 127.7, 126.9, 122.3, 121.0, 120.7, 120.1, 118.9, 118.4, 111.2, 110.3, 103.8, 102.2, 67.4, 48.4, 42.5, 28.0, 21.3, 17.2, 8.9; IR (KBr): 3648, 3055, 2958, 2869, 1558, 1455, 1339, 1305, 1238, 748  $\text{cm}^{-1}$ ; ESI FTMS exact mass calcd for  $(\text{C}_{29}\text{H}_{28}\text{N}_2\text{-H})^+$  requires  $m/z$  403.2179, found  $m/z$  403.2176; The enantiomeric excess: 90%, determined by HPLC (Daicel Chiralpak IB, hexane/isopropanol = 90/10, flow rate 1.0 mL/min, T = 30 °C, 254 nm):  $t_R = 4.417$  (minor),  $t_R = 9.393$  (major).

**(1R,3R)-3-(1H-indol-2-yl)-6-methyl-3,9-diphenyl-1-(*o*-tolyl)-2,3-dihydro-1H-pyrrolo[1,2-*a*]indole (3am):**

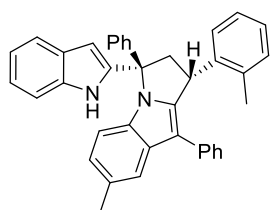

Following the general procedure, methyl-substituted 2-indolylmethanol **1a** (23.7 mg, 0.1 mmol), 3-alkyl(aryl)-2-indolylmethanol **2m** (65.4 mg, 0.2 mmol), catalyst (*S*)-**5d** (7.1 mg, 0.01 mmol) were added to a reaction tube. Then, EtOAc (1 mL) was added to the reaction mixture, which was

stirred at 30 °C for 5 h. After the completion of the reaction which was indicated by TLC, the reaction mixture was directly purified through preparative thin layer chromatography (petroleum ether/dichloromethane = 2:1) on silica gel to afford pure compound **3am** in 94% yield (49.6 mg) as a white solid. m.p. 119.7 – 120.2 °C; > 95:5 dr;  $[\alpha]_D^{20} = 47.9$  ( $c = 0.99$ , acetone);  $^1\text{H NMR}$  (400 MHz,  $\text{CDCl}_3$ )  $\delta$  8.11 (s, 1H), 7.72 (s, 1H), 7.54 (d,  $J = 7.6$  Hz, 1H), 7.42 – 7.36 (m, 3H), 7.30 – 7.27 (m, 2H), 7.24 (s, 1H), 7.20 – 7.14 (m, 5H), 7.13 – 7.09 (m, 1H), 7.08 – 7.03 (m, 2H), 7.01 – 6.94 (m, 2H), 6.83 – 6.76 (m, 2H), 6.59 (d,  $J = 8.0$  Hz, 1H), 6.41 (s, 1H), 4.89 – 4.78 (m, 1H), 3.69 – 3.57

(m, 1H), 3.35 – 3.20 (m, 1H), 2.45 (s, 3H), 2.31 (s, 3H);  $^{13}\text{C}$  NMR (100 MHz,  $\text{CDCl}_3$ )  $\delta$  142.3, 141.1, 138.9, 136.4, 135.3, 134.5, 131.5, 131.3, 130.2, 129.6, 128.7, 128.3, 128.1, 127.9, 127.8, 126.9, 126.7, 126.0, 125.2, 123.3, 122.5, 120.8, 120.1, 119.7, 111.1, 110.5, 109.5, 104.4, 68.2, 56.4, 53.5, 21.6, 19.7; IR (KBr): 3648, 3442, 3055, 3026, 2920, 1506, 1456, 1294, 1265, 743  $\text{cm}^{-1}$ ; ESI FTMS exact mass calcd for  $(\text{C}_{39}\text{H}_{32}\text{N}_2+\text{Na})^+$  requires  $m/z$  551.2457, found  $m/z$  551.2437; The enantiomeric excess: 91%, determined by HPLC (Daicel Chiralpak IB, hexane/isopropanol = 90/10, flow rate 1.0 mL/min,  $T = 30\text{ }^\circ\text{C}$ , 254 nm):  $t_{\text{R}} = 5.380$  (major),  $t_{\text{R}} = 6.443$  (minor).

**(1R,3R)-3-(1H-indol-2-yl)-3-phenyl-9-propyl-1-(*o*-tolyl)-2,3-dihydro-1H-pyrrolo[1,2-*a*]indole (3an):**

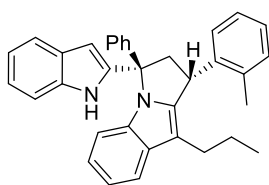

Following the general procedure, methyl-substituted 2-indolylmethanol **1a** (23.7 mg, 0.1 mmol), 3-alkyl(aryl)-2-indolylmethanol **2n** (55.8 mg, 0.2 mmol), catalyst (*S*)-**5d** (7.1 mg, 0.01 mmol) were added to a reaction tube. Then, EtOAc (1 mL) was added to the reaction mixture, which was stirred

at 30  $^\circ\text{C}$  for 5 h. After the completion of the reaction which was indicated by TLC, the reaction mixture was directly purified through preparative thin layer chromatography (petroleum ether/dichloromethane = 2:1) on silica gel to afford pure compound **3an** in 86% yield (41.3 mg) as a white solid. m.p. 220.7 – 220.9  $^\circ\text{C}$ ; > 95:5 dr;  $[\alpha]_{\text{D}}^{20} = 44.4$  ( $c = 0.83$ , acetone);  $^1\text{H}$  NMR (400 MHz,  $\text{CDCl}_3$ )  $\delta$  8.13 (s, 1H), 7.63 (d,  $J = 8.0$  Hz, 1H), 7.56 (d,  $J = 8.0$  Hz, 1H), 7.40 – 7.31 (m, 4H), 7.24 (s, 1H), 7.23 – 7.14 (m, 4H), 7.14 – 7.00 (m, 4H), 6.93 – 6.85 (m, 1H), 6.61 (d,  $J = 8.0$  Hz, 1H), 6.45 (s, 1H), 4.64 – 4.47 (m, 1H), 3.62 – 3.47 (m, 1H), 3.22 (s, 1H), 2.61 – 2.48 (m, 1H), 2.35 (s, 3H), 2.31 – 2.19 (m, 1H), 1.60 – 1.53 (m, 1H), 1.51 – 1.43 (m, 1H), 0.75 (t,  $J = 7.2$  Hz, 3H);  $^{13}\text{C}$  NMR (100 MHz,  $\text{CDCl}_3$ )  $\delta$  141.9, 141.1, 139.2, 136.4, 135.7, 133.1, 133.0, 130.5, 128.6, 128.0, 127.9, 126.9, 126.8, 126.5, 122.5, 121.1, 120.8, 120.1, 119.2, 119.1, 111.1, 110.7, 108.2, 104.3, 68.0, 56.9, 53.5, 25.9, 23.2, 19.7, 14.0; IR (KBr): 3055, 2955, 2928, 2867, 1490, 1473, 1336, 1265, 1011, 747  $\text{cm}^{-1}$ ; ESI FTMS exact mass calcd for  $(\text{C}_{35}\text{H}_{32}\text{N}_2-\text{H})^-$  requires  $m/z$  479.2492, found  $m/z$  479.2494; The enantiomeric excess: 94%, determined by HPLC (Daicel Chiralpak IB, hexane/isopropanol = 90/10, flow rate 1.0 mL/min,  $T = 30\text{ }^\circ\text{C}$ , 254 nm):  $t_{\text{R}} = 4.590$  (minor),  $t_{\text{R}} = 8.730$  (major).

**(1R,3R)-9-benzyl-3-(1H-indol-2-yl)-3-phenyl-1-(*o*-tolyl)-2,3-dihydro-1H-pyrrolo[1,2-*a*]indole (3ao):**



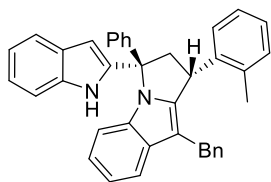

Following the general procedure, methyl-substituted 2-indolylmethanol **1a** (23.7 mg, 0.1 mmol), 3-alkyl(aryl)-2-indolylmethanol **2o** (65.4 mg, 0.2 mmol), catalyst (*S*)-**5d** (7.1 mg, 0.01 mmol) were added to a reaction tube. Then, EtOAc (1 mL) was added to the reaction mixture, which was stirred at 30 °C for 5 h. After the completion of the reaction which was indicated by TLC, the reaction mixture was directly purified through preparative thin layer chromatography (petroleum ether/dichloromethane = 2:1) on silica gel to afford pure compound **3ao** in 98% yield (51.7 mg) as a white solid. m.p. 80.9 – 81.2 °C; > 95:5 dr;  $[\alpha]_D^{20} = 40.6$  ( $c = 1.03$ , acetone);  $^1\text{H NMR}$  (400 MHz,  $\text{CDCl}_3$ )  $\delta$  8.13 (s, 1H), 7.60 – 7.51 (m, 2H), 7.42 – 7.35 (m, 3H), 7.35 – 7.26 (m, 2H), 7.22 – 7.09 (m, 8H), 7.08 – 7.03 (m, 3H), 6.98 – 6.94 (m, 2H), 6.93 – 6.87 (m, 1H), 6.64 (d,  $J = 8.0$  Hz, 1H), 6.46 (s, 1H), 4.46 – 4.36 (m, 1H), 4.02 – 3.91 (m, 1H), 3.67 – 3.57 (m, 1H), 3.58 – 3.46 (m, 1H), 3.32 – 3.13 (m, 1H), 2.15 (s, 3H);  $^{13}\text{C NMR}$  (100 MHz,  $\text{CDCl}_3$ )  $\delta$  142.8, 141.2, 141.0, 139.1, 136.4, 135.9, 133.1, 133.0, 130.5, 128.6, 128.4, 128.1, 128.0, 127.9, 126.9, 126.8, 126.5, 125.5, 122.5, 121.3, 120.8, 120.1, 119.5, 119.3, 111.2, 110.7, 106.7, 104.4, 68.2, 56.8, 38.3, 30.1, 19.5; IR (KBr): 3440, 3057, 3024, 2926, 1602, 1453, 1298, 1166, 1048, 745  $\text{cm}^{-1}$ ; ESI FTMS exact mass calcd for  $(\text{C}_{39}\text{H}_{32}\text{N}_2\text{-H})^+$  requires  $m/z$  527.2492, found  $m/z$  527.2500; The enantiomeric excess: 93%, determined by HPLC (Daicel Chiralpak IB, hexane/isopropanol = 90/10, flow rate 1.0 mL/min,  $T = 30$  °C, 254 nm):  $t_R = 5.146$  (minor),  $t_R = 9.416$  (major).

**(1*R*,3*R*)-3-(1*H*-indol-2-yl)-9-methyl-3-(*m*-tolyl)-1-(*o*-tolyl)-2,3-dihydro-1*H*-pyrrolo[1,2-*a*]indole (**3ba**):**

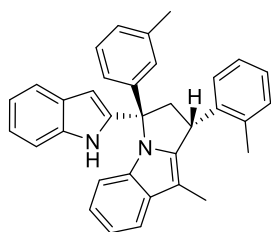

Following the general procedure, methyl-substituted 2-indolylmethanol **1b** (25.1 mg, 0.1 mmol), 3-alkyl(aryl)-2-indolylmethanol **2a** (50.2 mg, 0.2 mmol), catalyst (*S*)-**5d** (7.1 mg, 0.01 mmol) were added to a reaction tube. Then, EtOAc (1 mL) was added to the reaction mixture, which was stirred at 30 °C for 5 h. After the completion of the reaction which was indicated by TLC, the reaction mixture was directly purified through preparative thin layer chromatography (petroleum ether/dichloromethane = 2:1) on silica gel to afford pure compound **3ba** in 64% yield (29.8 mg) as a white solid. m.p. 102.8 – 103.7 °C; > 95:5 dr;  $[\alpha]_D^{20} = 25.3$  ( $c = 0.60$ , acetone);  $^1\text{H NMR}$  (400 MHz,  $\text{CDCl}_3$ )  $\delta$  8.09 (s, 1H), 7.63 – 7.55 (m, 2H), 7.37 – 7.33 (m, 1H), 7.25 – 7.16 (m, 7H), 7.15 – 7.09 (m, 2H), 7.07 (s, 1H), 6.95 – 6.89 (m, 1H), 6.82 (d,  $J = 7.2$  Hz, 1H), 6.65 (d,  $J = 8.0$  Hz, 1H), 6.44

(s, 1H), 4.68 – 4.60 (m, 1H), 3.64 – 3.56 (m, 1H), 3.28 – 3.18 (m, 1H), 2.40 (s, 3H), 2.37 (s, 3H), 2.03 (s, 3H); <sup>13</sup>C NMR (100 MHz, CDCl<sub>3</sub>) δ 141.6, 141.1, 139.5, 138.9, 138.2, 136.4, 135.8, 133.6, 132.9, 130.6, 128.8, 128.5, 127.9, 127.6, 126.9, 126.5, 123.9, 122.4, 121.2, 120.8, 120.1, 119.1, 118.8, 111.1, 110.6, 104.2, 103.0, 67.9, 56.6, 38.5, 21.8, 19.7, 8.6; IR (KBr): 3648, 3049, 2921, 2860, 1699, 1473, 1455, 1338, 1299, 740 cm<sup>-1</sup>; ESI FTMS exact mass calcd for (C<sub>34</sub>H<sub>30</sub>N<sub>2</sub>+Na)<sup>+</sup> requires m/z 489.2301, found m/z 489.2291; The enantiomeric excess: 92%, determined by HPLC (Daicel Chiralpak IB, hexane/isopropanol = 90/10, flow rate 1.0 mL/min, T = 30 °C, 254 nm): t<sub>R</sub> = 4.783 (minor), t<sub>R</sub> = 6.310 (major).

**(1R,3R)-3-(1H-indol-2-yl)-3-(4-methoxyphenyl)-9-methyl-1-(o-tolyl)-2,3-dihydro-1H-pyrrolo[1,2-a]indole (3ca):**

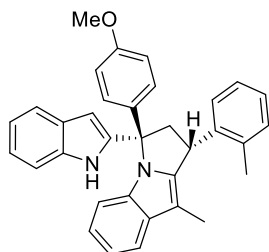

Following the general procedure, methyl-substituted 2-indolylmethanol **1c** (26.7 mg, 0.1 mmol), 3-alkyl(aryl)-2-indolylmethanol **2a** (50.2 mg, 0.2 mmol), catalyst (*S*)-**5d** (7.1 mg, 0.01 mmol) were added to a reaction tube. Then, EtOAc (1 mL) was added to the reaction mixture, which was stirred at 30 °C for 5 h. After the completion of the reaction which was indicated

by TLC, the reaction mixture was directly purified through preparative thin layer chromatography (petroleum ether/dichloromethane = 2:1) on silica gel to afford pure compound **3ca** in 98% yield (47.2 mg) as a white solid. m.p. 231.2 – 231.4 °C; > 95:5 dr; [α]<sub>D</sub><sup>20</sup> = 30.9 (c = 0.94, acetone); <sup>1</sup>H NMR (400 MHz, CDCl<sub>3</sub>) δ 8.08 (s, 1H), 7.58 – 7.52 (m, 2H), 7.34 – 7.30 (m, 1H), 7.25 – 7.22 (m, 1H), 7.22 – 7.14 (m, 4H), 7.12 – 7.06 (m, 2H), 7.00 (d, *J* = 8.4 Hz, 2H), 6.92 – 6.85 (m, 3H), 6.61 (d, *J* = 8.4 Hz, 1H), 6.40 (s, 1H), 4.61 – 4.54 (m, 1H), 3.82 (s, 3H), 3.55 – 3.48 (m, 1H), 3.19 – 3.10 (m, 1H), 2.36 (s, 3H), 1.98 (s, 3H); <sup>13</sup>C NMR (100 MHz, CDCl<sub>3</sub>) δ 159.2, 141.6, 139.7, 136.4, 135.8, 133.6, 133.0, 132.9, 130.6, 128.1, 128.0, 126.9, 126.6, 122.5, 121.2, 120.8, 120.1, 119.1, 118.8, 113.9, 111.2, 110.6, 104.2, 103.0, 67.5, 56.5, 55.3, 38.5, 19.7, 8.6; IR (KBr): 3648, 3049, 2931, 2860, 1699, 1615, 1507, 1456, 1252, 747 cm<sup>-1</sup>; ESI FTMS exact mass calcd for (C<sub>34</sub>H<sub>30</sub>N<sub>2</sub>O+Na)<sup>+</sup> requires m/z 505.2250, found m/z 505.2235; The enantiomeric excess: 89%, determined by HPLC (Daicel Chiralpak IB, hexane/isopropanol = 90/10, flow rate 1.0 mL/min, T = 30 °C, 254 nm): t<sub>R</sub> = 5.726 (minor), t<sub>R</sub> = 7.073 (major).

**(1S,3R)-3-(1H-indol-2-yl)-9-methyl-3-(thiophen-2-yl)-1-(o-tolyl)-2,3-dihydro-1H-pyrrolo[1,2-a]indole (3da):**

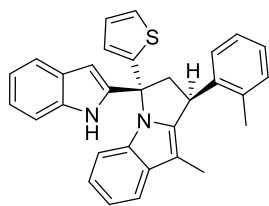

Following the general procedure, methyl-substituted 2-indolylmethanol **1d** (48.6 mg, 0.2 mmol), 3-alkyl(aryl)-2-indolylmethanol **2a** (25.1 mg, 0.1 mmol), catalyst (*R*)-**4e** (14.0 mg, 0.02 mmol) were added to a reaction tube. Then, EtOAc (1 mL) was added to the reaction mixture, which was stirred at 30 °C for 5 h. After the completion of the reaction which was indicated by TLC, the reaction mixture was directly purified through preparative thin layer chromatography (petroleum ether/dichloromethane = 2:1) on silica gel to afford pure compound **3da** in 52% yield (23.8 mg) as a white solid. m.p. 103.3 – 103.7 °C; > 95:5 dr;  $[\alpha]_D^{20} = -78.2$  ( $c = 0.48$ , acetone);  $^1\text{H NMR}$  (400 MHz,  $\text{CDCl}_3$ )  $\delta$  8.18 (s, 1H), 7.59 – 7.53 (m, 2H), 7.36 – 7.31 (m, 1H), 7.29 – 7.27 (m, 1H), 7.25 (s, 1H), 7.24 – 7.15 (m, 4H), 7.14 – 7.09 (m, 2H), 7.01 – 6.93 (m, 3H), 6.85 (d,  $J = 8.0$  Hz, 1H), 6.50 (s, 1H), 4.84 – 4.76 (m, 1H), 3.70 – 3.62 (m, 1H), 3.11 – 3.01 (m, 1H), 2.44 (s, 3H), 1.97 (s, 3H);  $^{13}\text{C NMR}$  (100 MHz,  $\text{CDCl}_3$ )  $\delta$  144.9, 141.4, 139.2, 138.7, 136.3, 135.8, 134.1, 132.2, 130.6, 128.0, 126.9, 126.8, 126.6, 125.7, 125.1, 122.5, 121.1, 120.8, 120.1, 119.4, 118.8, 111.1, 111.0, 103.6, 65.3, 57.0, 39.1, 19.6, 8.6; IR (KBr): 3436, 3050, 2916, 2859, 1616, 1489, 1455, 1336, 1238, 741  $\text{cm}^{-1}$ ; ESI FTMS exact mass calcd for  $(\text{C}_{31}\text{H}_{26}\text{N}_2\text{S}+\text{Na})^+$  requires  $m/z$  481.1709, found  $m/z$  481.1695; The enantiomeric excess: 82%, determined by HPLC (Daicel Chiralpak IB, hexane/isopropanol = 90/10, flow rate 1.0 mL/min,  $T = 30$  °C, 254 nm):  $t_R = 5.036$  (major),  $t_R = 9.140$  (minor).

**(1R,3R)-9-methyl-3-(5-methyl-1H-indol-2-yl)-3-phenyl-1-(*o*-tolyl)-2,3-dihydro-1H-pyrrolo[1,2-*a*]indole (3ea):**

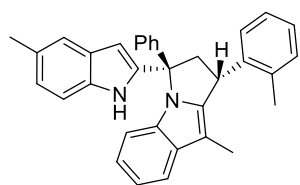

Following the general procedure, methyl-substituted 2-indolylmethanol **1e** (25.1 mg, 0.1 mmol), 3-alkyl(aryl)-2-indolylmethanol **2a** (50.2 mg, 0.2 mmol), catalyst (*S*)-**5d** (7.1 mg, 0.01 mmol) were added to a reaction tube. Then, EtOAc (1 mL) was added to the reaction mixture, which was stirred at 30 °C for 5 h. After the completion of the reaction which was indicated by TLC, the reaction mixture was directly purified through preparative thin layer chromatography (petroleum ether/dichloromethane = 2:1) on silica gel to afford pure compound **3ea** in 80% yield (37.3 mg) as a white solid. m.p. 123.4 – 124.2 °C; > 95:5 dr;  $[\alpha]_D^{20} = 88.5$  ( $c = 0.75$ , acetone);  $^1\text{H NMR}$  (400 MHz,  $\text{CDCl}_3$ )  $\delta$  8.00 (s, 1H), 7.59 (d,  $J = 8.0$  Hz, 1H), 7.40 – 7.32 (m, 5H), 7.24 – 7.16 (m, 3H), 7.16 – 7.06 (m, 4H), 7.00 (d,  $J = 8.4$  Hz, 1H), 6.94 – 6.86 (m,

1H), 6.62 (d,  $J = 8.0$  Hz, 1H), 6.33 (s, 1H), 4.62 – 4.52 (m, 1H), 3.61 – 3.51 (m, 1H), 3.25 – 3.13 (m, 1H), 2.44 (s, 3H), 2.35 (s, 3H), 1.99 (s, 3H);  $^{13}\text{C}$  NMR (100 MHz,  $\text{CDCl}_3$ )  $\delta$  141.6, 141.1, 139.5, 139.4, 139.3, 135.9, 134.8, 133.7, 133.6, 133.0, 132.9, 130.6, 129.4, 128.6, 128.2, 128.0, 126.9, 126.6, 124.2, 121.3, 120.4, 119.2, 118.8, 110.8, 110.6, 103.9, 103.1, 68.0, 56.6, 38.3, 21.5, 19.7, 8.7; IR (KBr): 3567, 3022, 2918, 2859, 1733, 1558, 1455, 1339, 1311, 743  $\text{cm}^{-1}$ ; ESI FTMS exact mass calcd for  $(\text{C}_{34}\text{H}_{30}\text{N}_2+\text{Na})^+$  requires  $m/z$  489.2301, found  $m/z$  489.2283; The enantiomeric excess: 90%, determined by HPLC (Daicel Chiralpak IB, hexane/isopropanol = 90/10, flow rate 1.0 mL/min,  $T = 30$  °C, 254 nm):  $t_{\text{R}} = 5.233$  (minor),  $t_{\text{R}} = 11.520$  (major).

**(1*R*,3*R*)-3-(5-bromo-1*H*-indol-2-yl)-9-methyl-3-phenyl-1-(*o*-tolyl)-2,3-dihydro-1*H*-pyrrolo[1,2-*a*]indole (3fa):**

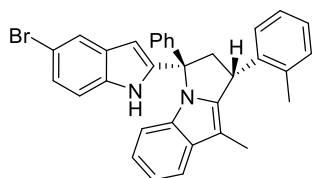

Following the general procedure, methyl-substituted 2-indolylmethanol **1f** (31.5 mg, 0.1 mmol), 3-alkyl(aryl)-2-indolylmethanol **2a** (50.2 mg, 0.2 mmol), catalyst (*S*)-**5d** (7.1 mg, 0.01 mmol) were added to a reaction tube. Then, EtOAc (1 mL) was added to the reaction mixture, which was stirred at 30 °C for 5 h. After the completion of the reaction which was indicated by TLC, the reaction mixture was directly purified through preparative thin layer chromatography (petroleum ether/dichloromethane = 2:1) on silica gel to afford pure compound **3fa** in 67% yield (35.5 mg) as a white solid. m.p. 254.8 – 255.0 °C; > 95:5 dr;  $[\alpha]_{\text{D}}^{20} = 88.3$  ( $c = 0.71$ , acetone);  $^1\text{H}$  NMR (400 MHz,  $\text{CDCl}_3$ )  $\delta$  8.10 (s, 1H), 7.63 (s, 1H), 7.59 (d,  $J = 8.0$  Hz, 1H), 7.41 – 7.33 (m, 3H), 7.30 – 7.27 (m, 1H), 7.25 – 7.20 (m, 2H), 7.20 – 7.12 (m, 2H), 7.12 – 7.00 (m, 4H), 6.95 – 6.86 (m, 1H), 6.55 (d,  $J = 8.4$  Hz, 1H), 6.33 (s, 1H), 4.65 – 4.51 (m, 1H), 3.63 – 3.49 (m, 1H), 3.23 – 3.05 (m, 1H), 2.35 (s, 3H), 2.00 (s, 3H);  $^{13}\text{C}$  NMR (100 MHz,  $\text{CDCl}_3$ )  $\delta$  141.5, 140.8, 140.7, 138.7, 135.8, 135.0, 133.6, 132.8, 130.6, 129.5, 128.6, 128.1, 126.9, 126.8, 126.5, 125.3, 123.2, 121.3, 119.3, 118.9, 113.2, 112.5, 110.3, 103.7, 103.3, 67.8, 56.5, 38.4, 19.6, 8.6; IR (KBr): 3437, 3372, 3055, 2917, 2860, 1558, 1490, 1455, 1307, 740  $\text{cm}^{-1}$ ; ESI FTMS exact mass calcd for  $(\text{C}_{33}\text{H}_{27}\text{BrN}_2+\text{H})^+$  requires  $m/z$  531.1431, found  $m/z$  531.1434; The enantiomeric excess: 91%, determined by HPLC (Daicel Chiralpak IB, hexane/isopropanol = 90/10, flow rate 1.0 mL/min,  $T = 30$  °C, 254 nm):  $t_{\text{R}} = 5.583$  (minor),  $t_{\text{R}} = 16.930$  (major).

**(1*R*,3*R*)-3-(6-chloro-1*H*-indol-2-yl)-9-methyl-3-phenyl-1-(*o*-tolyl)-2,3-dihydro-1*H*-pyrrolo[1,2-*a*]indole (3ga):**

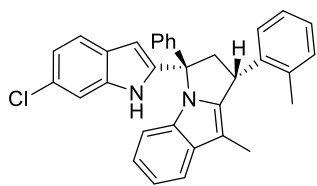

Following the general procedure, methyl-substituted 2-indolymethanol **1g** (27.1 mg, 0.1 mmol), 3-alkyl(aryl)-2-indolymethanol **2a** (50.2 mg, 0.2 mmol), catalyst (*S*)-**5d** (7.1 mg, 0.01 mmol) were added to a reaction tube. Then, EtOAc (1 mL) was added to the reaction mixture, which was stirred at 30 °C for 5 h. After the completion of the reaction which was indicated by TLC, the reaction mixture was directly purified through preparative thin layer chromatography (petroleum ether/dichloromethane = 2:1) on silica gel to afford pure compound **3ga** in 69% yield (33.5 mg) as a white solid. m.p. 121.3 – 121.7 °C; > 95:5 dr;  $[\alpha]_D^{20} = 49.7$  ( $c = 0.67$ , acetone);  $^1\text{H NMR}$  (400 MHz,  $\text{CDCl}_3$ )  $\delta$  8.04 (s, 1H), 7.59 (d,  $J = 8.0$  Hz, 1H), 7.41 (d,  $J = 8.4$  Hz, 1H), 7.39 – 7.32 (m, 3H), 7.32 – 7.28 (m, 1H), 7.23 – 7.12 (m, 4H), 7.11 – 7.03 (m, 4H), 6.93 – 6.85 (m, 1H), 6.56 (d,  $J = 8.0$  Hz, 1H), 6.35 (s, 1H), 4.63 – 4.53 (m, 1H), 3.61 – 3.50 (m, 1H), 3.18 – 3.06 (m, 1H), 2.35 (s, 3H), 2.00 (s, 3H);  $^{13}\text{C NMR}$  (100 MHz,  $\text{CDCl}_3$ )  $\delta$  141.5, 140.8, 140.2, 136.7, 135.8, 133.7, 132.8, 130.6, 128.7, 128.3, 128.1, 127.0, 126.8, 126.6, 126.4, 121.7, 121.4, 120.9, 119.3, 119.0, 111.1, 110.4, 104.3, 103.3, 67.8, 56.5, 38.6, 19.7, 8.7; IR (KBr): 3587, 3055, 2916, 2860, 1716, 1616, 1455, 1339, 1311, 741  $\text{cm}^{-1}$ ; ESI FTMS exact mass calcd for  $(\text{C}_{33}\text{H}_{27}\text{ClN}_2+\text{Na})^+$  requires  $m/z$  509.1755, found  $m/z$  509.1733; The enantiomeric excess: 85%, determined by HPLC (Daicel Chiralpak IB, hexane/isopropanol = 90/10, flow rate 1.0 mL/min,  $T = 30$  °C, 254 nm):  $t_R = 5.453$  (minor),  $t_R = 15.290$  (major).

## 5. Procedure for one-mmol-scale reaction

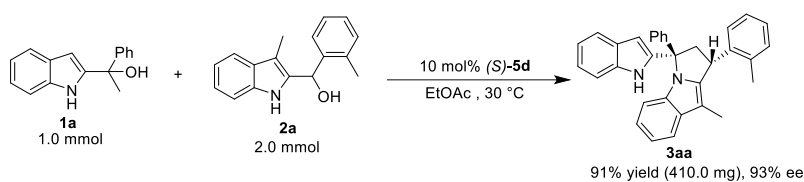

Methyl-substituted 2-indolymethanol **1a** (237.1 mg, 1.0 mmol), 3-alkyl(aryl)-2-indolymethanol **2a** (502.3 mg, 2.0 mmol), and catalyst (*S*)-**5d** (70.8 mg, 0.1 mmol) were added to a reaction tube. Then, ethyl acetate (10 mL) was added to the reaction mixture, which was stirred at 30 °C for 5 h. After the completion of the reaction which was indicated by TLC, the reaction mixture was concentrated under reduced pressure and the residue was purified through flash column chromatography (petroleum ether/dichloromethane = 2:1) on silica gel to afford pure compound **3aa**

in 91% yield (410.0 mg) with 93% ee.

## 6. Synthetic procedures and characterization data of products 6-7

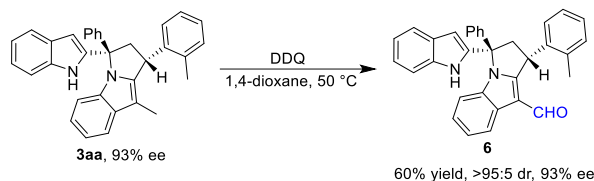

Compound **3aa** (45.2 mg, 0.1 mmol), DDQ (45.4 mg, 0.2 mmol) and 1,4-dioxane (1.0 mL) were added to a reaction tube. Then, the reaction mixture was stirred at 50 °C for 3 h. After the completion of the reaction which was indicated by TLC, the reaction mixture was directly purified by preparative thin layer chromatography (petroleum ether/acetone = 5:1) on silica gel to afford pure product **6** (27.8 mg, 60% yield) with 93% ee.

### (1*R*,3*R*)-3-(1*H*-indol-2-yl)-3-phenyl-1-(*o*-tolyl)-2,3-dihydro-1*H*-pyrrolo[1,2-*a*]indole-9-

**carbaldehyde (6)**: white solid; m.p. 298.6 – 299.7 °C;  $[\alpha]_D^{20} = 67.3$  ( $c = 0.56$ , acetone);  $^1\text{H NMR}$  (400 MHz,  $\text{CDCl}_3$ )  $\delta$  9.46 (s, 1H), 8.39 – 8.25 (m, 2H), 7.57 (d,  $J = 7.6$  Hz, 1H), 7.46 – 7.36 (m, 4H), 7.33 – 7.27 (m, 1H), 7.24 – 7.19 (m, 4H), 7.17 – 7.09 (m, 4H), 7.02 – 6.96 (m, 1H), 6.65 (d,  $J = 8.0$  Hz, 1H), 6.52 (s, 1H), 4.93 – 4.80 (m, 1H), 3.71 – 3.59 (m, 1H), 3.52 – 3.31 (m, 1H), 2.38 (s, 3H);  $^{13}\text{C NMR}$  (100 MHz,  $\text{CDCl}_3$ )  $\delta$  184.5, 156.4, 139.4, 137.2, 136.5, 135.6, 133.4, 129.6, 129.0, 128.7, 127.7, 127.1, 126.6, 123.8, 123.3, 123.0, 122.7, 121.0, 120.5, 111.3, 111.2, 105.1, 70.0, 56.3, 39.2, 19.7; IR (KBr): 3054, 1643, 1537, 1452, 1413, 1384, 1301, 1263, 1162, 749  $\text{cm}^{-1}$ ; ESI FTMS exact mass calcd for  $(\text{C}_{33}\text{H}_{26}\text{N}_2\text{O}+\text{Na})^+$  requires  $m/z$  489.1937, found  $m/z$  489.1935; The enantiomeric excess: 93%, determined by HPLC (Daicel Chiralpak IC, hexane/isopropanol = 90/10, flow rate 1.0 mL/min,  $T = 30$  °C, 254 nm):  $t_R = 8.893$  (minor),  $t_R = 11.037$  (major).

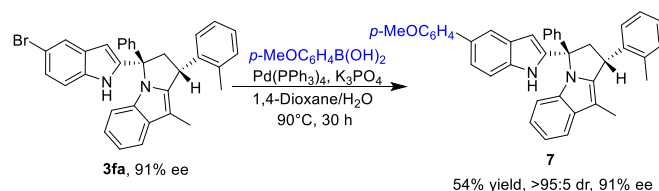

To a solution of **3fa** (53.0 mg, 0.1 mmol) in 1,4-dioxane/ $\text{H}_2\text{O}$  (1 mL, 4:1 v/v) was added  $\text{Pd(PPh}_3)_4$  (11.6 mg, 0.01 mmol), (*p*-methoxyphenyl)boronic acid (18.2 mg, 0.12 mmol) and  $\text{K}_3\text{PO}_4$  (42.5 mg, 0.2 mmol). Then, the reaction mixture was stirred at 90 °C for 30 hours under argon atmosphere. After the completion of the reaction which was indicated by TLC, water (5 mL) was

added to the mixture and the aqueous layer was extracted with EtOAc (3 × 10.0 mL). The combined organic layers were dried over anhydrous Na<sub>2</sub>SO<sub>4</sub> and concentrated under reduced pressure. Finally, the residue was purified by preparative thin layer chromatography (petroleum ether/ethyl acetate = 4:1) on silica gel to afford pure product **7** (30.2 mg, 54% yield) with 91% ee.

**(1*R*,3*R*)-3-(5-(4-methoxyphenyl)-1*H*-indol-2-yl)-9-methyl-3-phenyl-1-(*o*-tolyl)-2,3-dihydro-1*H*-pyrrolo[1,2-*a*]indole (7)**: white solid; m.p. 107.4 – 108.4 °C; [ $\alpha$ ]<sub>D</sub><sup>20</sup> = 127.0 (c = 0.60, acetone); <sup>1</sup>H NMR (400 MHz, CDCl<sub>3</sub>)  $\delta$  8.10 (s, 1H), 7.69 (s, 1H), 7.59 (d, *J* = 8.0 Hz, 1H), 7.56 (s, 1H), 7.54 (s, 1H), 7.40 – 7.32 (m, 5H), 7.28 (s, 1H), 7.24 – 7.17 (m, 3H), 7.13 – 7.07 (m, 3H), 6.99 (s, 1H), 6.97 (s, 1H), 6.95 – 6.89 (m, 1H), 6.65 (d, *J* = 8.4 Hz, 1H), 6.44 (s, 1H), 4.64 – 4.54 (m, 1H), 3.86 (s, 3H), 3.62 – 3.52 (m, 1H), 3.29 – 3.11 (m, 1H), 2.35 (s, 3H), 2.00 (s, 3H); <sup>13</sup>C NMR (100 MHz, CDCl<sub>3</sub>)  $\delta$  158.5, 141.6, 141.0, 140.0, 135.9, 135.7, 135.1, 133.6, 133.4, 132.9, 130.6, 128.6, 128.5, 128.3, 128.0, 127.0, 126.9, 126.6, 122.2, 121.3, 119.2, 118.9, 118.8, 114.2, 111.3, 110.6, 104.6, 103.2, 68.0, 56.6, 55.4, 38.9, 19.7, 8.7; IR (KBr): 3024, 2930, 2834, 1608, 1514, 1455, 1313, 1273, 1242, 742 cm<sup>-1</sup>; ESI FTMS exact mass calcd for (C<sub>40</sub>H<sub>34</sub>N<sub>2</sub>O+Na)<sup>+</sup> requires *m/z* 581.2563, found *m/z* 581.2546; The enantiomeric excess: 91%, determined by HPLC (Daicel Chiralpak AD-H, hexane/isopropanol = 90/10, flow rate 1.0 mL/min, T = 30 °C, 254 nm): *t*<sub>R</sub> = 5.623 (minor), *t*<sub>R</sub> = 6.510 (major).

## 7. NMR spectra of substrates 1b-1g and 8

$^1\text{H}$  NMR (400 MHz,  $\text{CDCl}_3$ ) of compound **1b**:

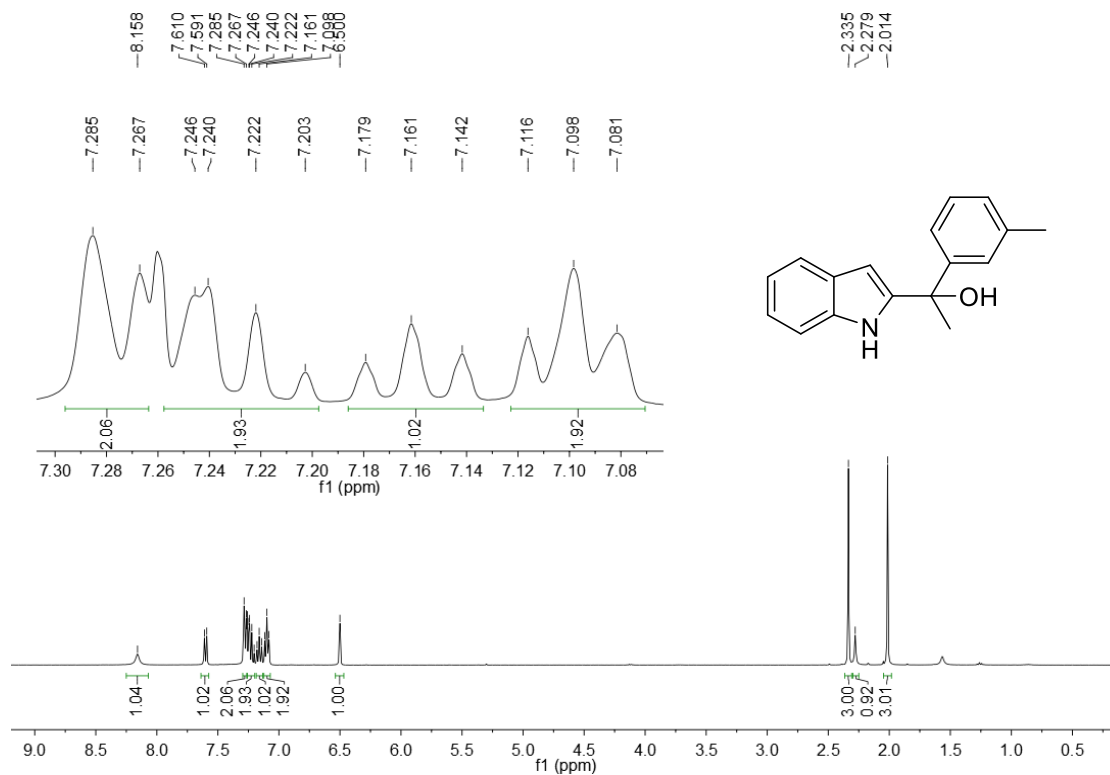

$^{13}\text{C}$  NMR (100 MHz,  $\text{CDCl}_3$ ) of compound **1b**:

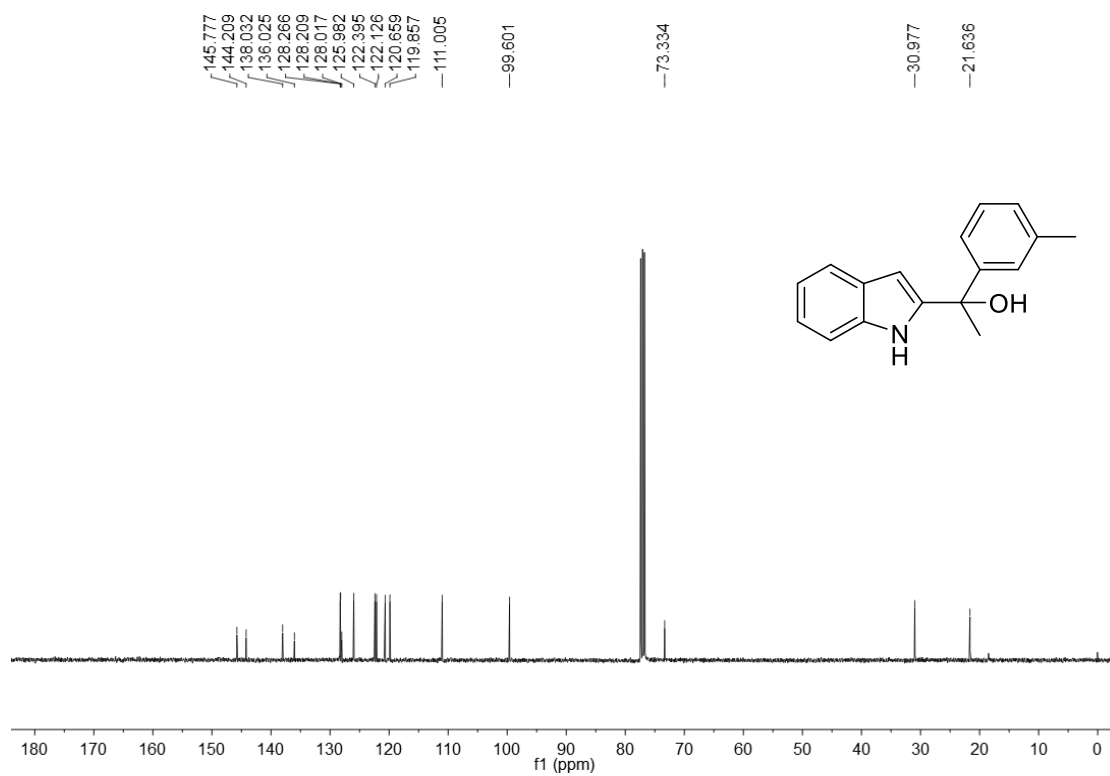



<sup>1</sup>H NMR (400 MHz, CDCl<sub>3</sub>) of compound **1c**:

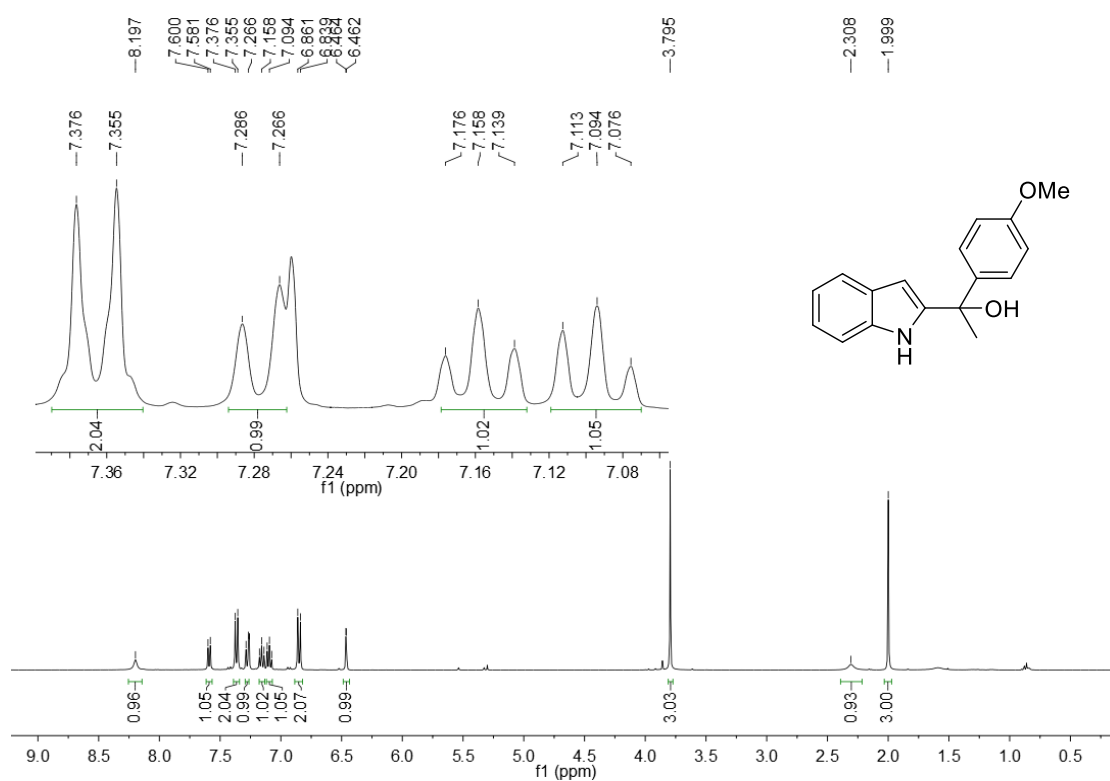

<sup>13</sup>C NMR (100 MHz, CDCl<sub>3</sub>) of compound **1c**:

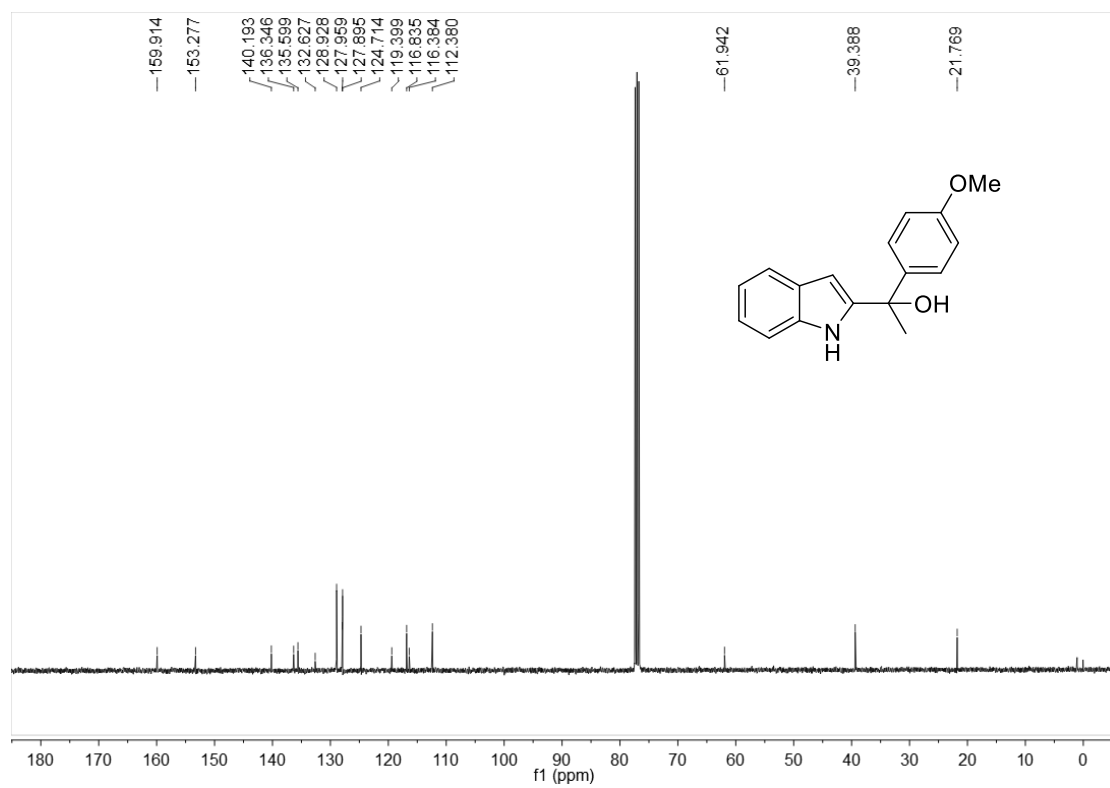

<sup>1</sup>H NMR (400 MHz, CDCl<sub>3</sub>) of compound **1d**:

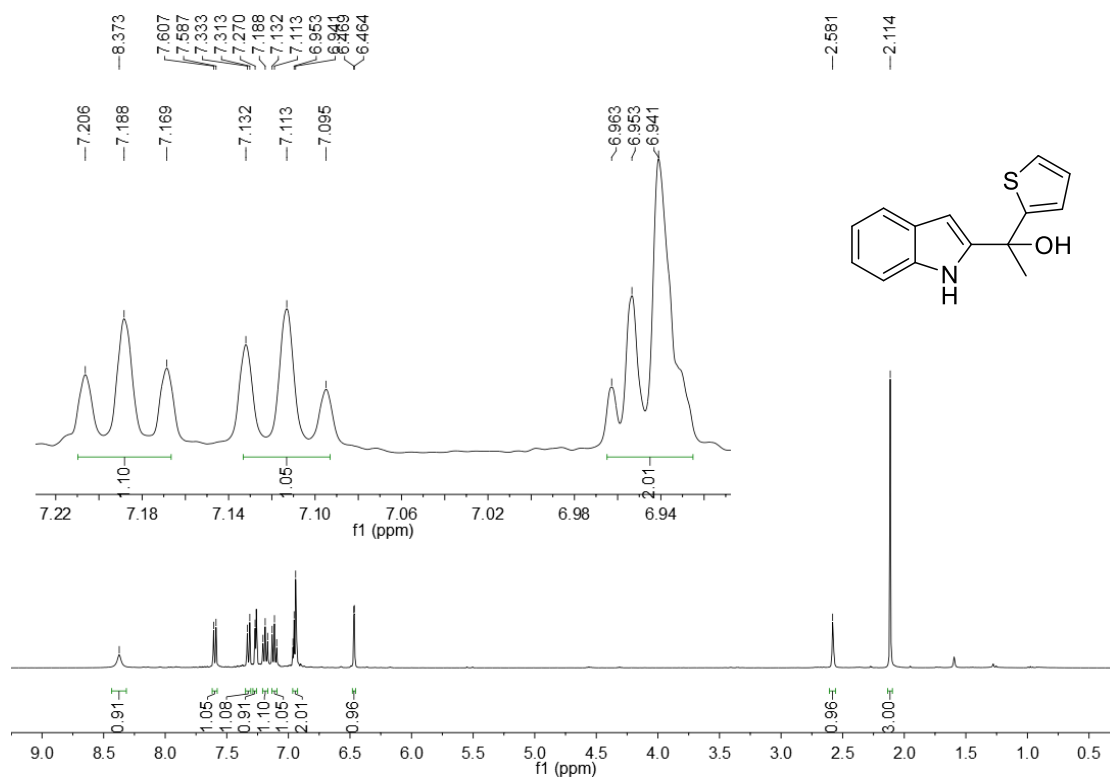

<sup>13</sup>C NMR (100 MHz, CDCl<sub>3</sub>) of compound **1d**:

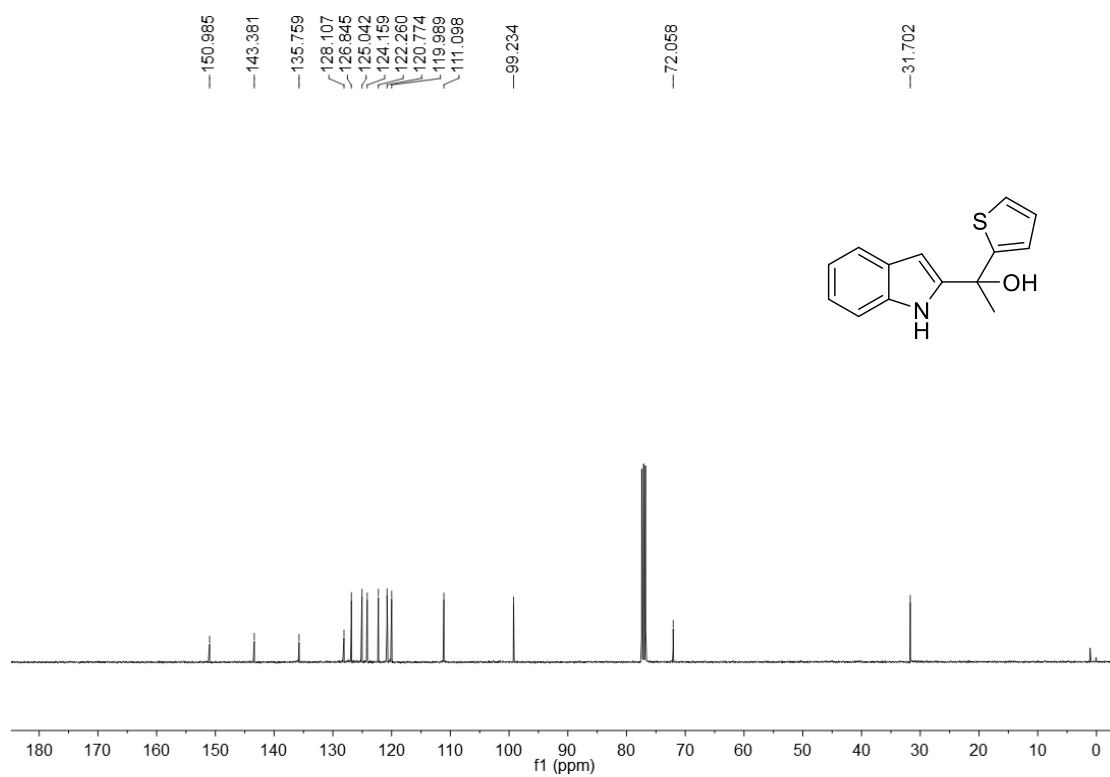

<sup>1</sup>H NMR (400 MHz, CDCl<sub>3</sub>) of compound **1e**:

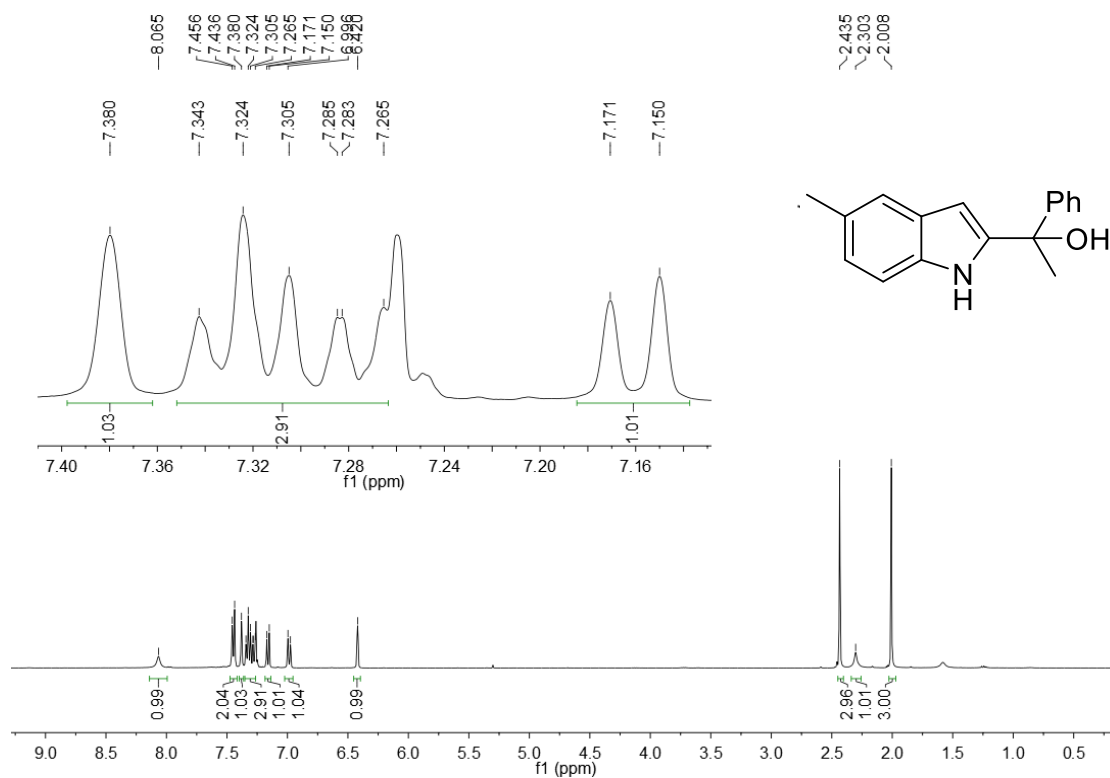

<sup>13</sup>C NMR (100 MHz, CDCl<sub>3</sub>) of compound **1e**:

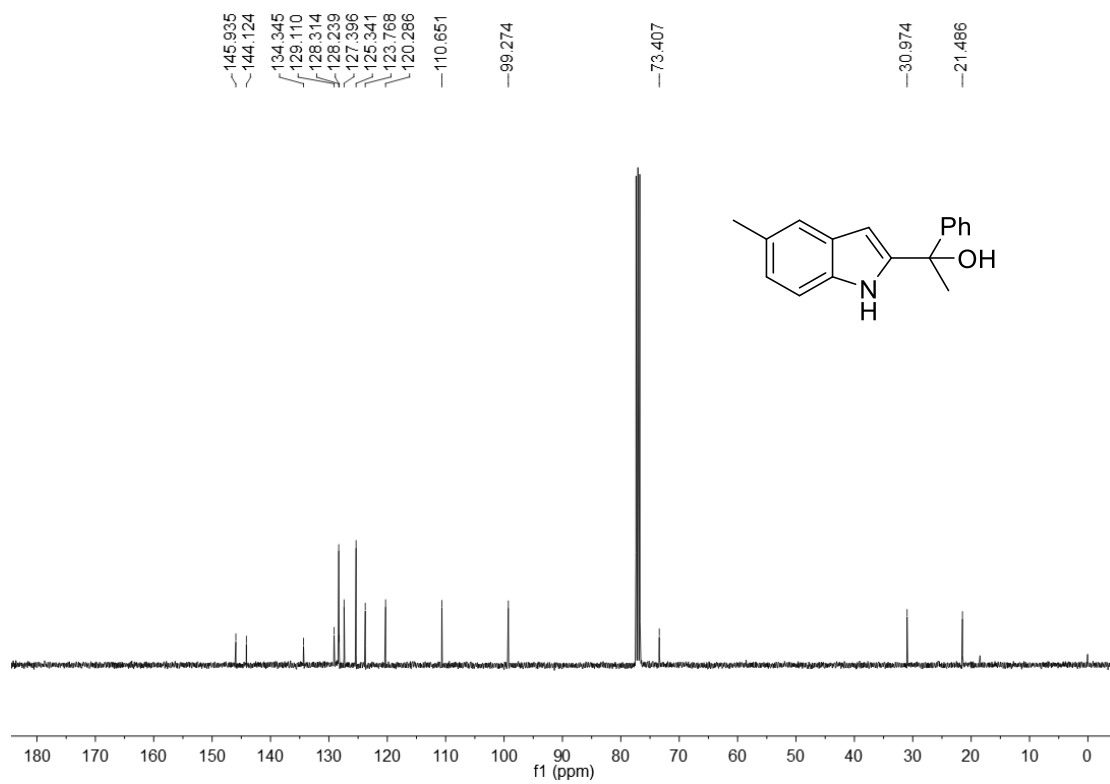

<sup>1</sup>H NMR (400 MHz, CDCl<sub>3</sub>) of compound **1f**:

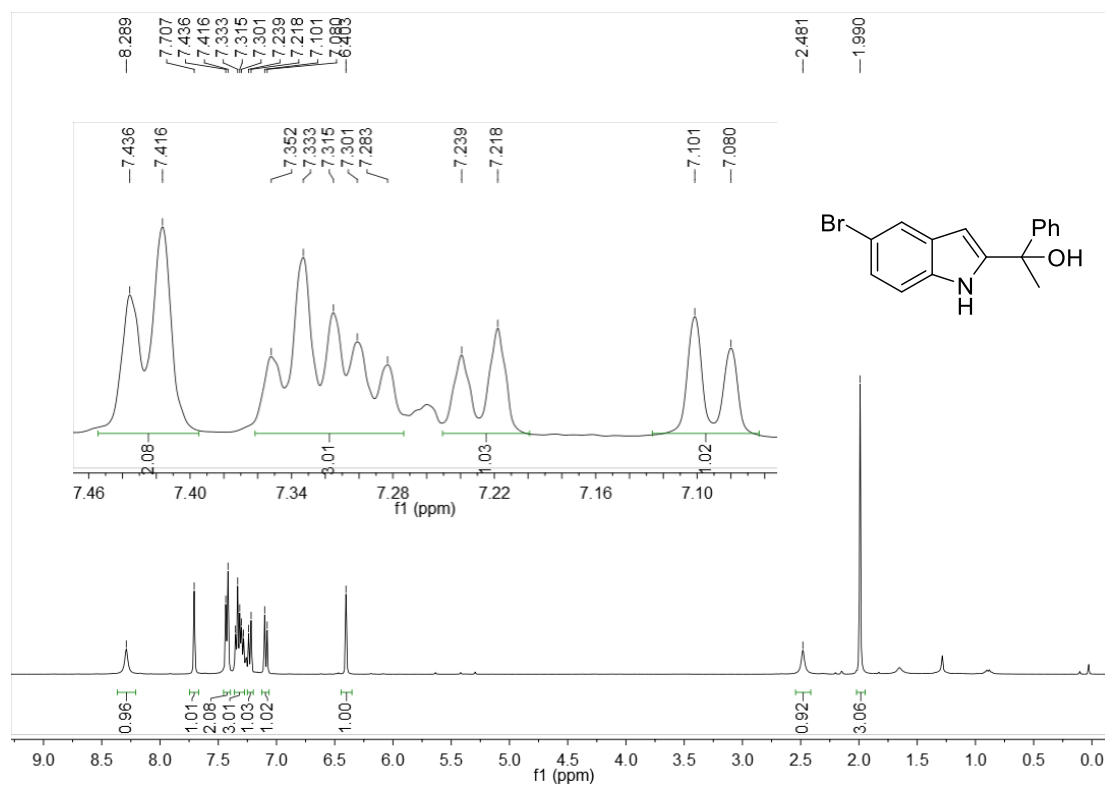

<sup>13</sup>C NMR (100 MHz, CDCl<sub>3</sub>) of compound **1f**:

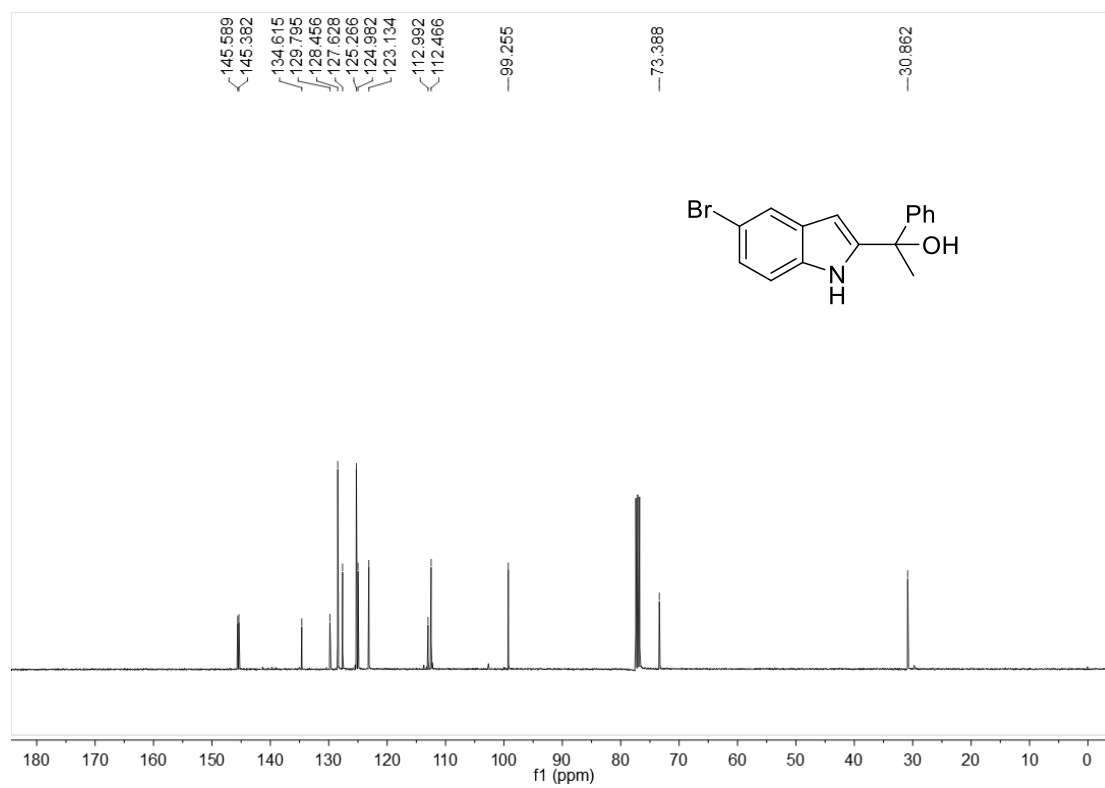

<sup>1</sup>H NMR (400 MHz, CDCl<sub>3</sub>) of compound **1g**:

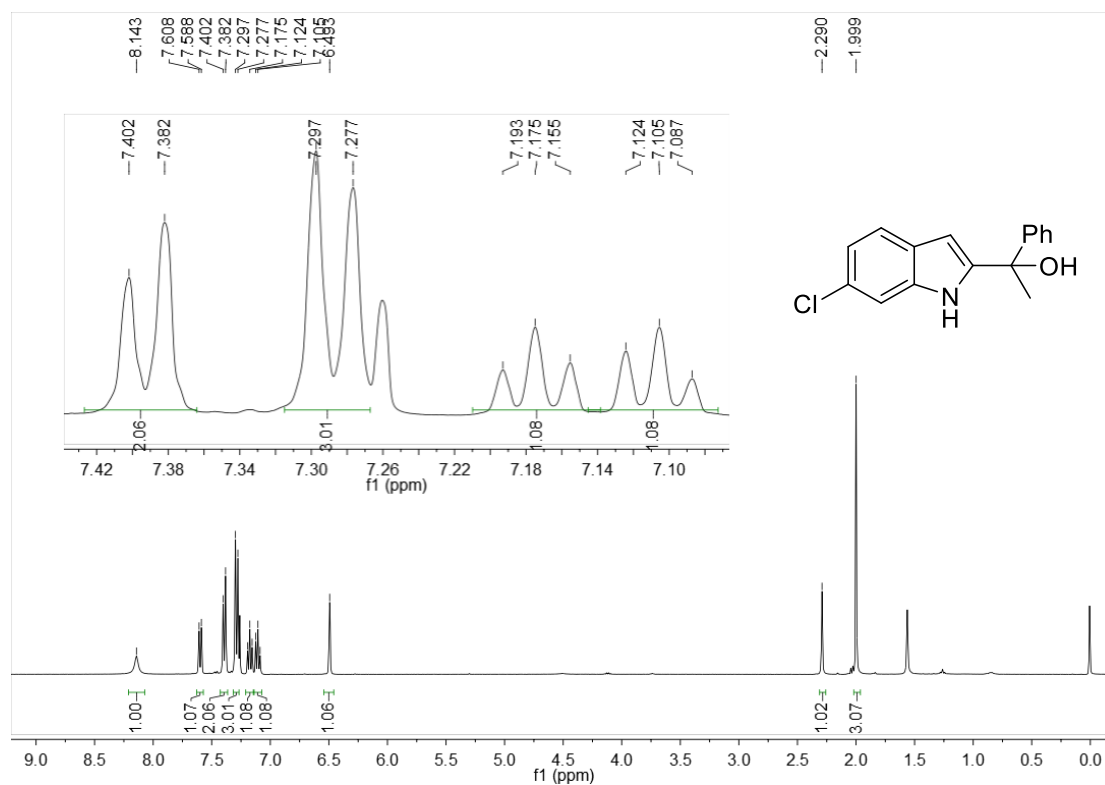

<sup>13</sup>C NMR (100 MHz, CDCl<sub>3</sub>) of compound **1g**:

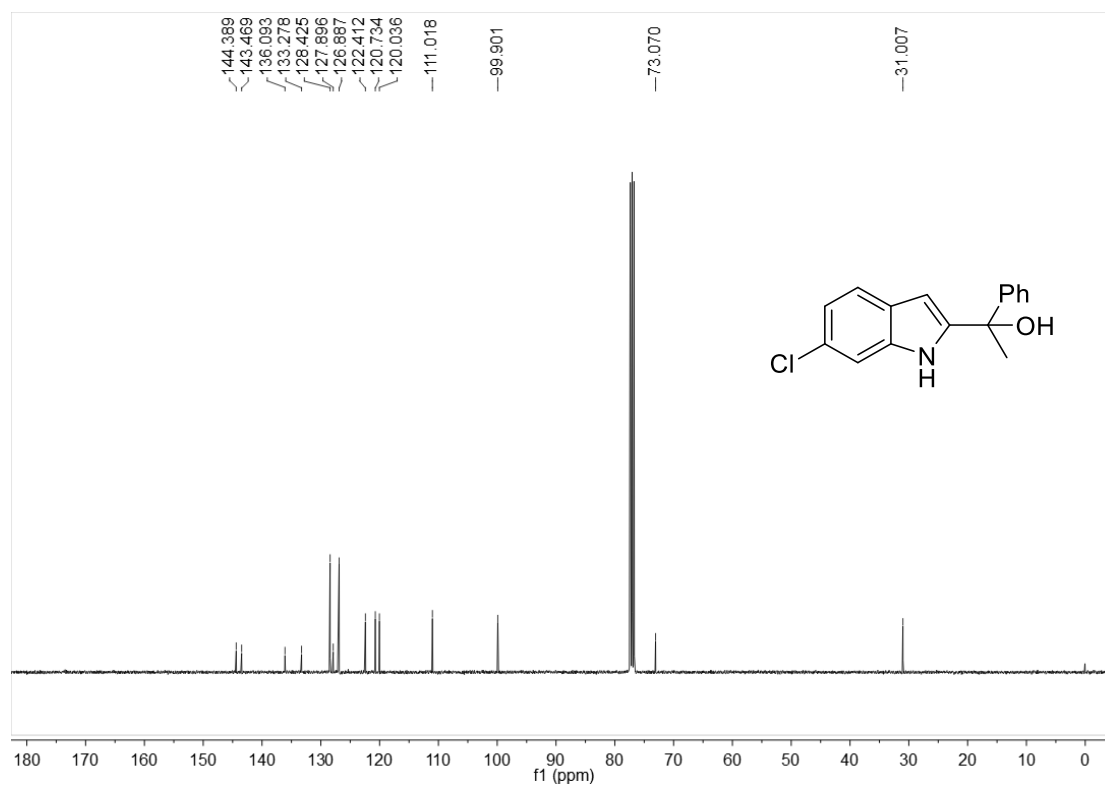

$^1\text{H}$  NMR (400 MHz,  $\text{CDCl}_3$ ) of compound **8**:

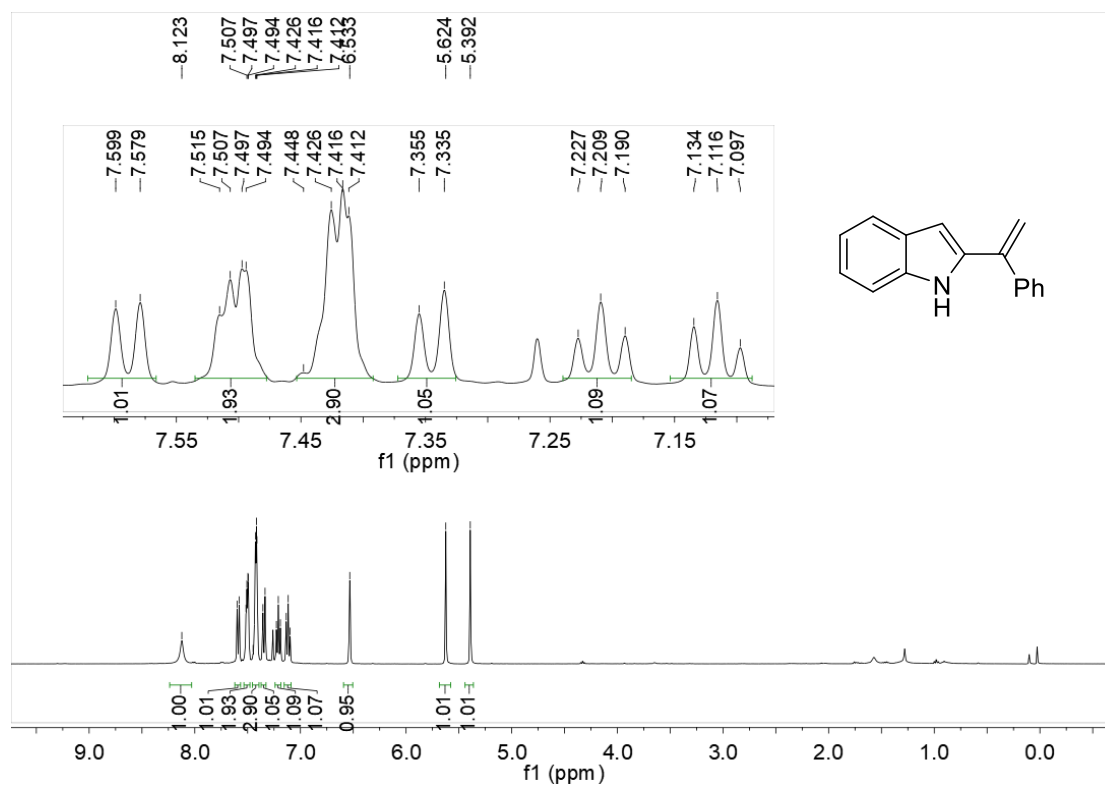

$^{13}\text{C}$  NMR (100 MHz,  $\text{CDCl}_3$ ) of compound **8**:

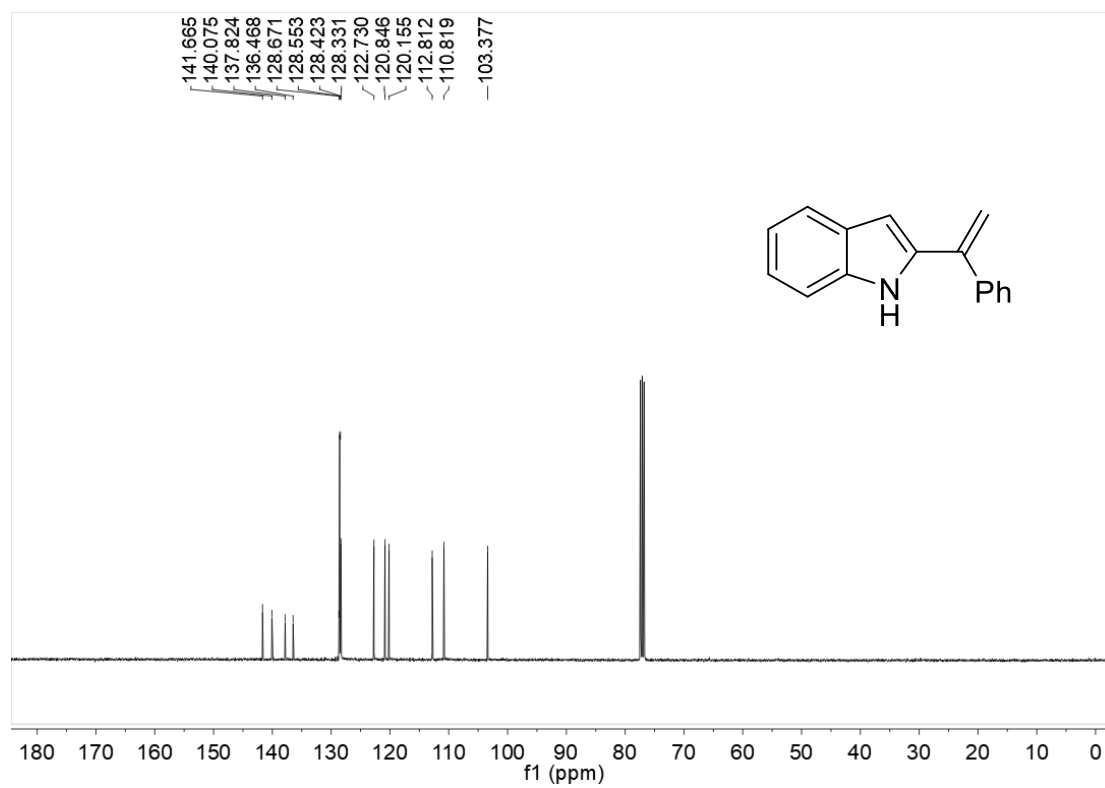

## 8. NMR spectra of products 3 and 6-7

$^1\text{H}$  NMR (400 MHz,  $\text{CDCl}_3$ ) of compound **3aa**:

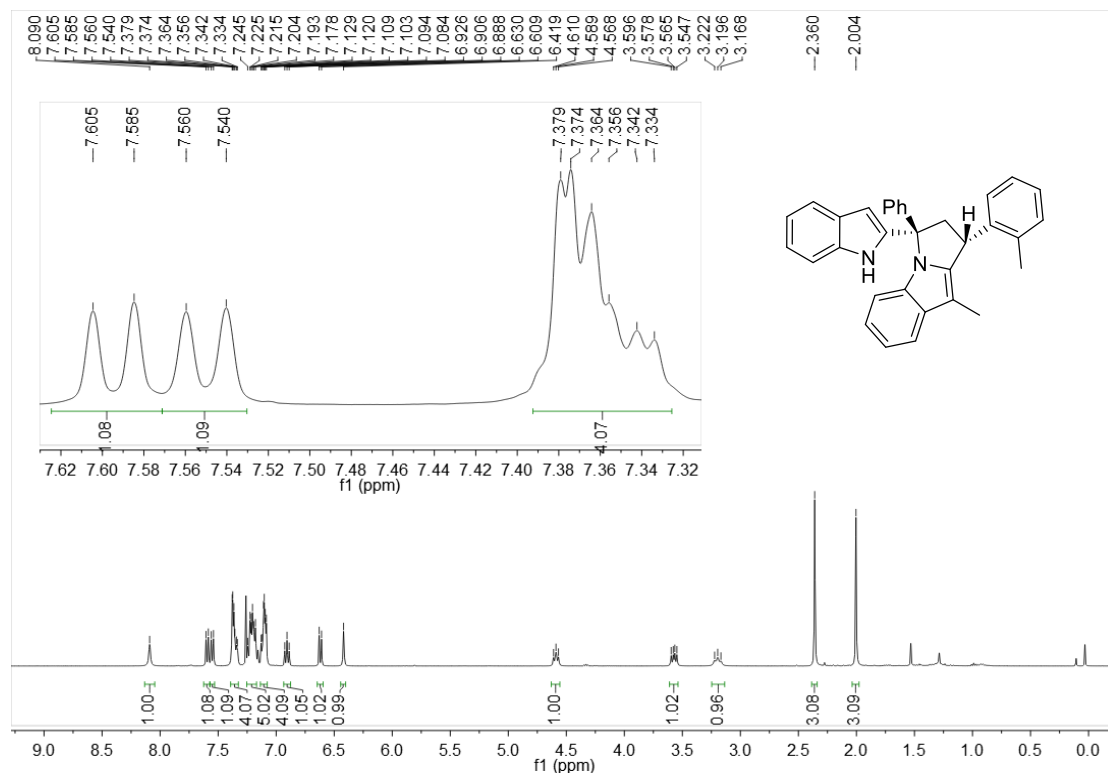

$^{13}\text{C}$  NMR (100 MHz,  $\text{CDCl}_3$ ) of compound **3aa**:

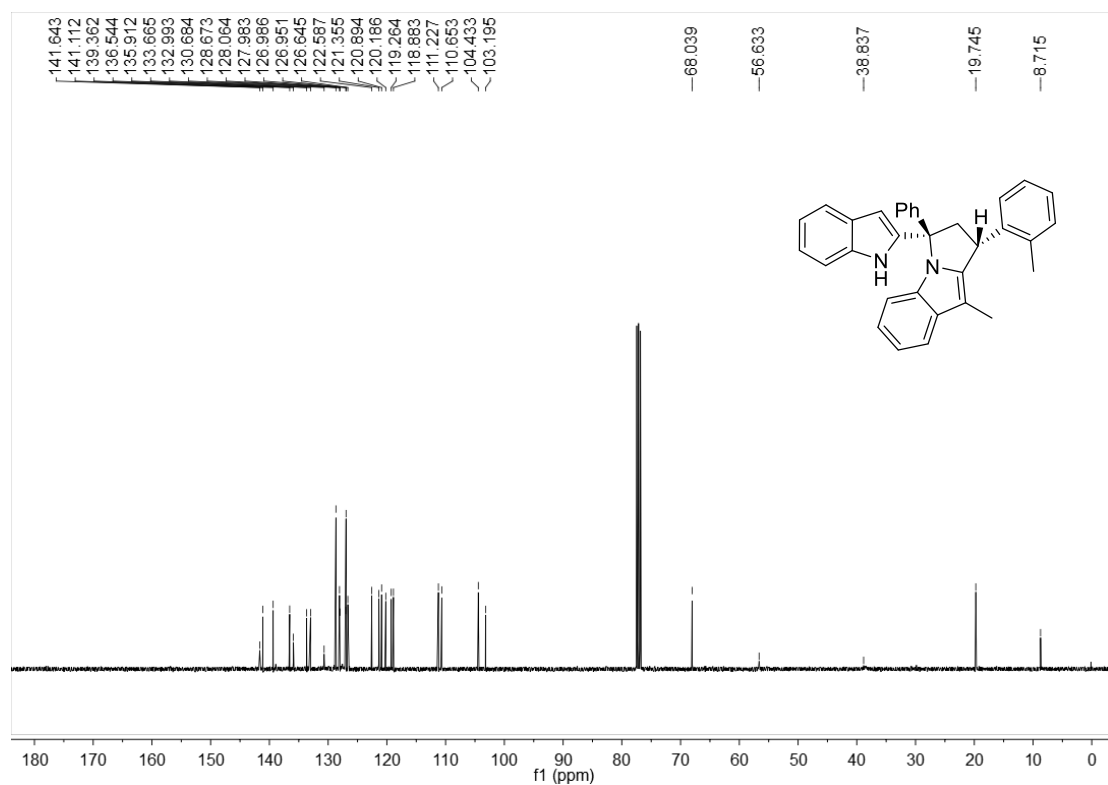

<sup>1</sup>H NMR (400 MHz, CDCl<sub>3</sub>) of compound **3ab**:

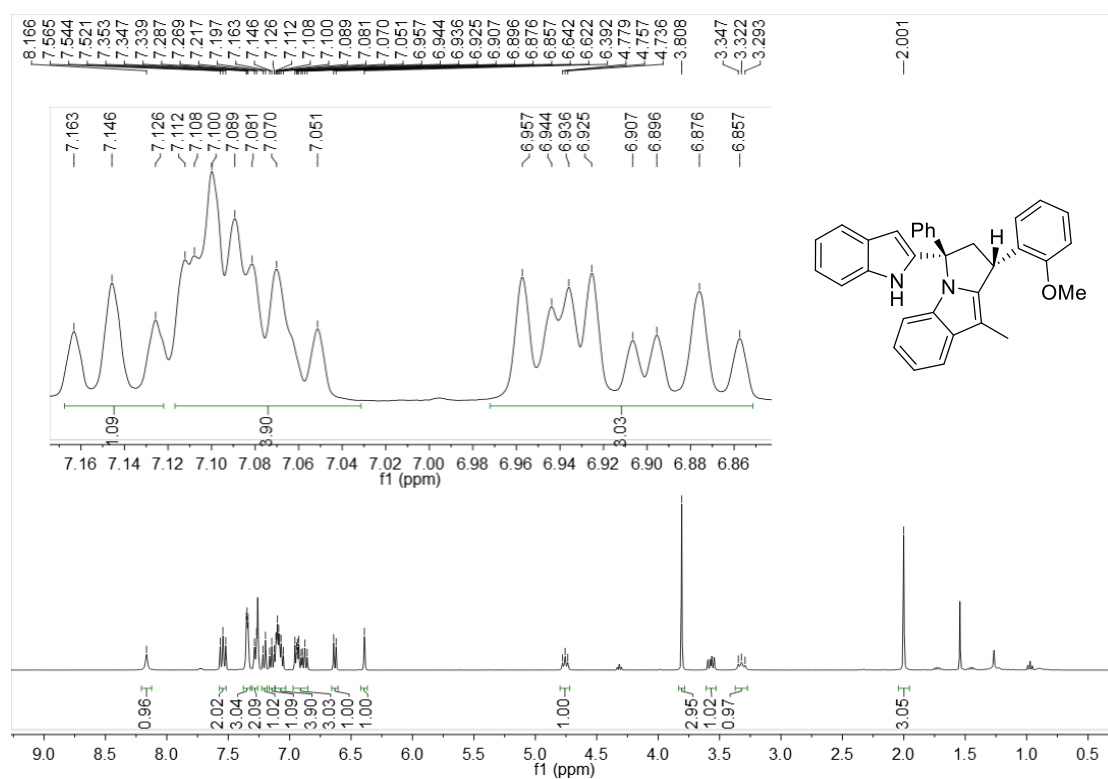

<sup>13</sup>C NMR (100 MHz, CDCl<sub>3</sub>) of compound **3ab**:

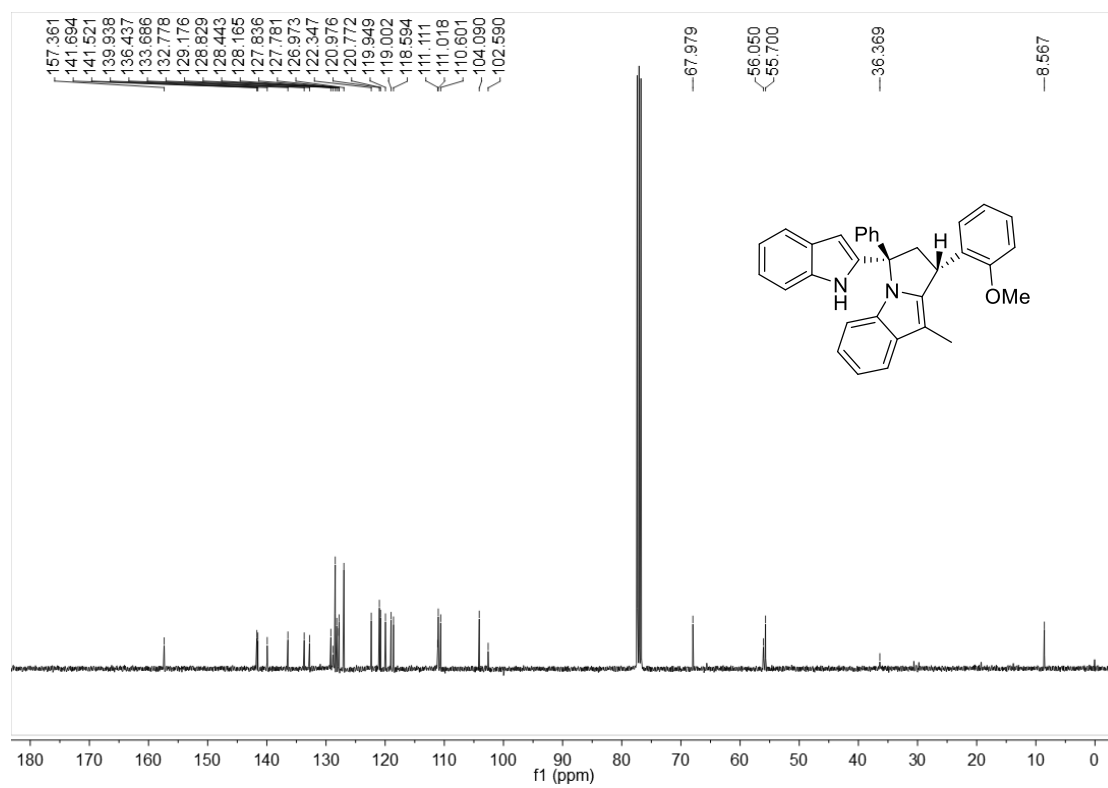



<sup>1</sup>H NMR (400 MHz, CDCl<sub>3</sub>) of compound **3ac**:

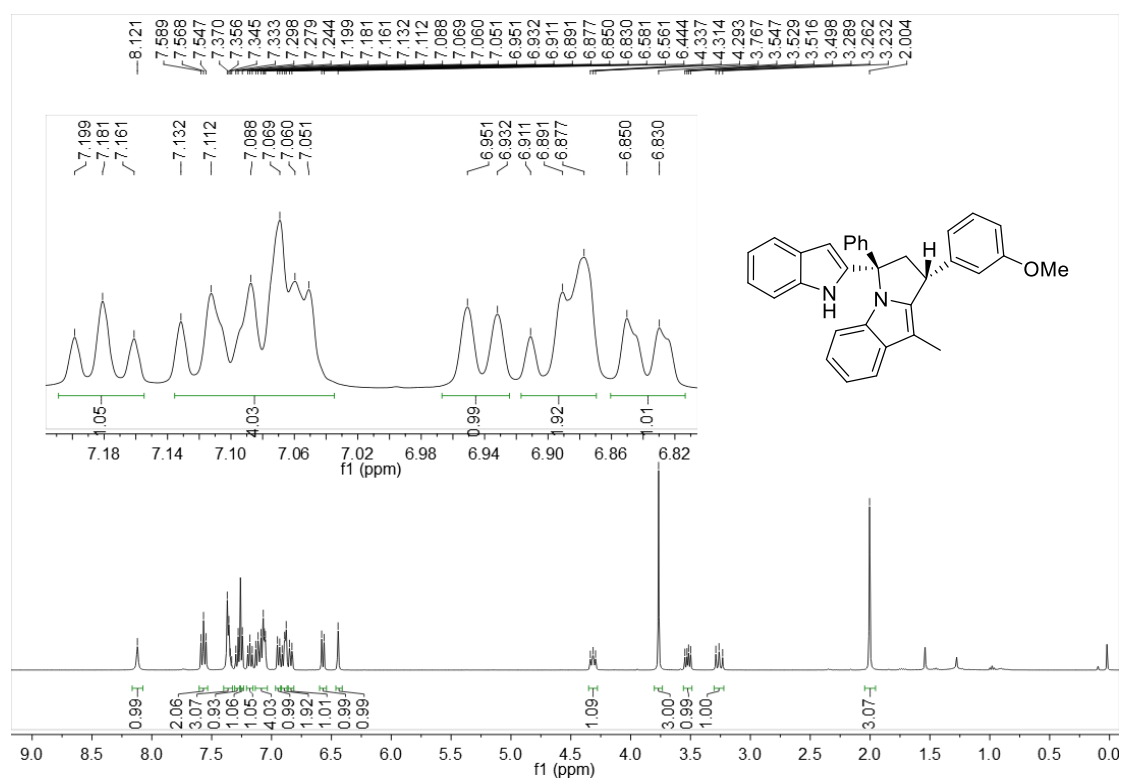

<sup>13</sup>C NMR (100 MHz, CDCl<sub>3</sub>) of compound **3ac**:

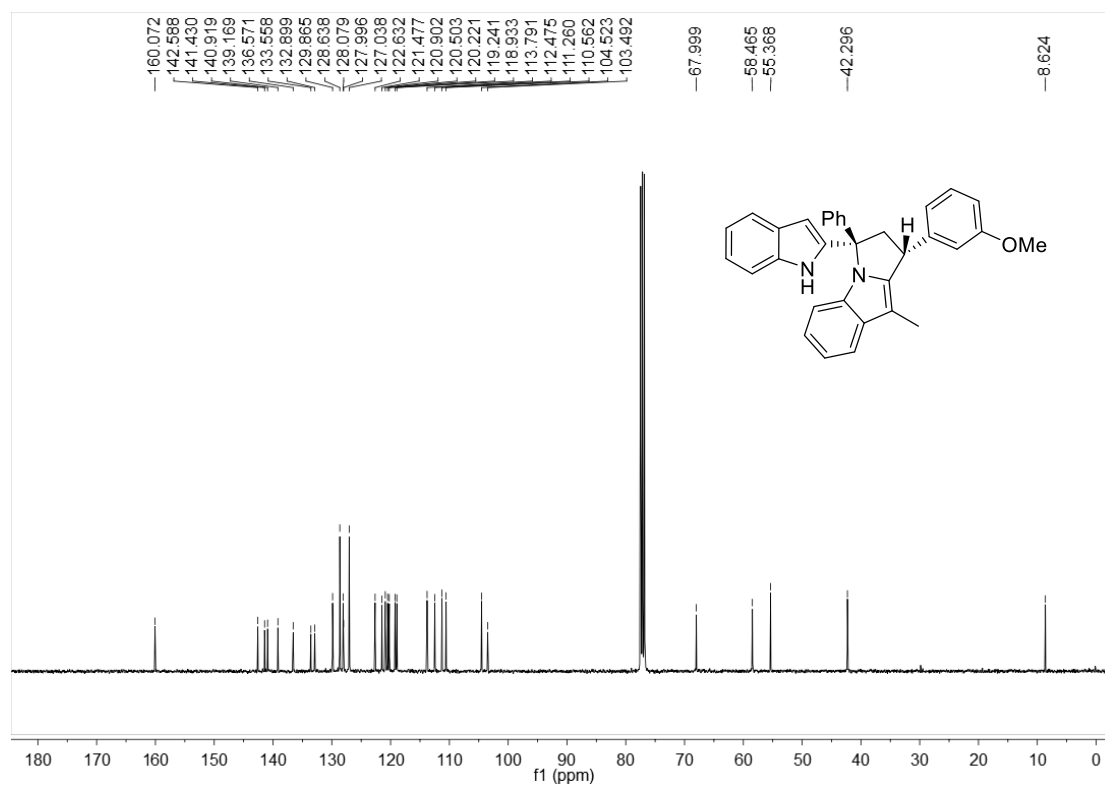

<sup>1</sup>H NMR (400 MHz, CDCl<sub>3</sub>) of compound **3ad**:

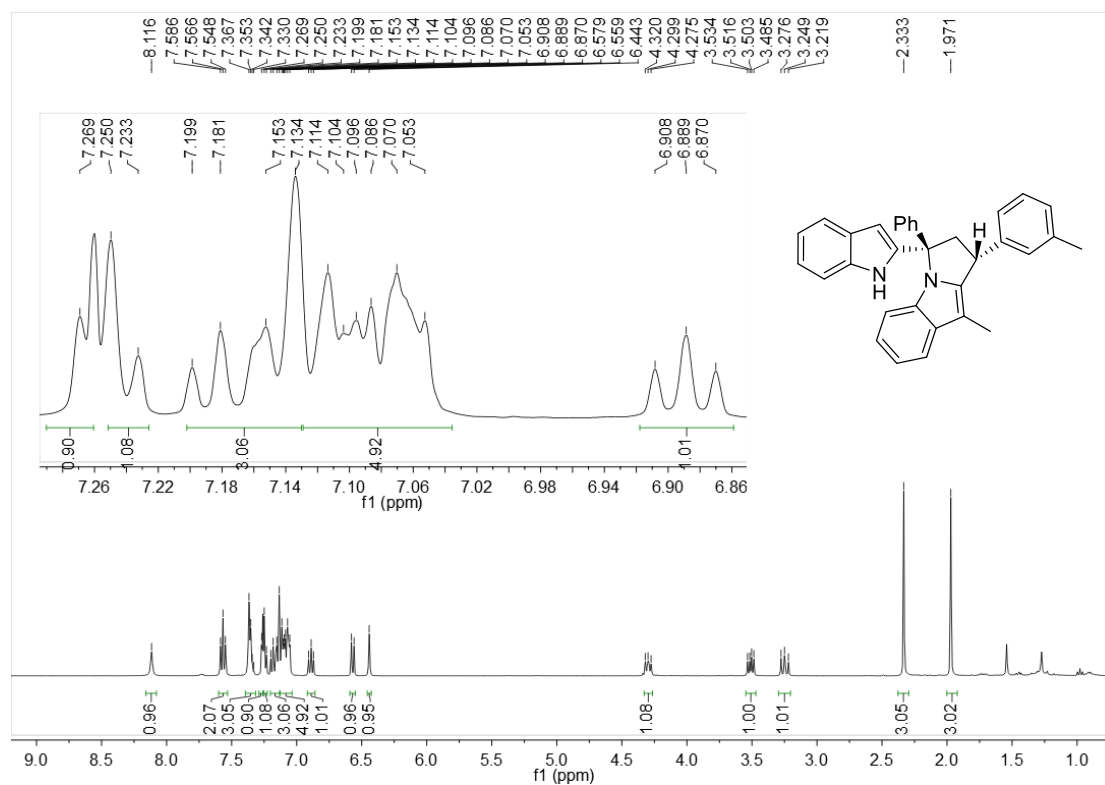

<sup>13</sup>C NMR (100 MHz, CDCl<sub>3</sub>) of compound **3ad**:

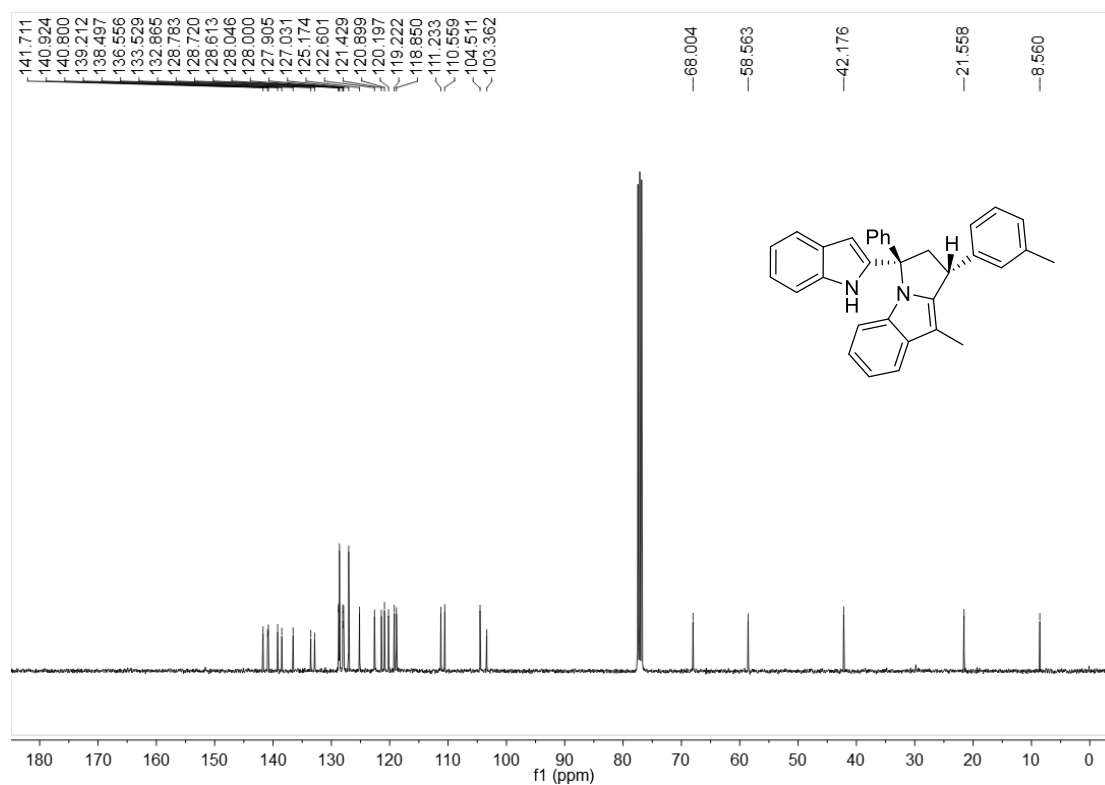

<sup>1</sup>H NMR (400 MHz, CDCl<sub>3</sub>) of compound **3ae**:

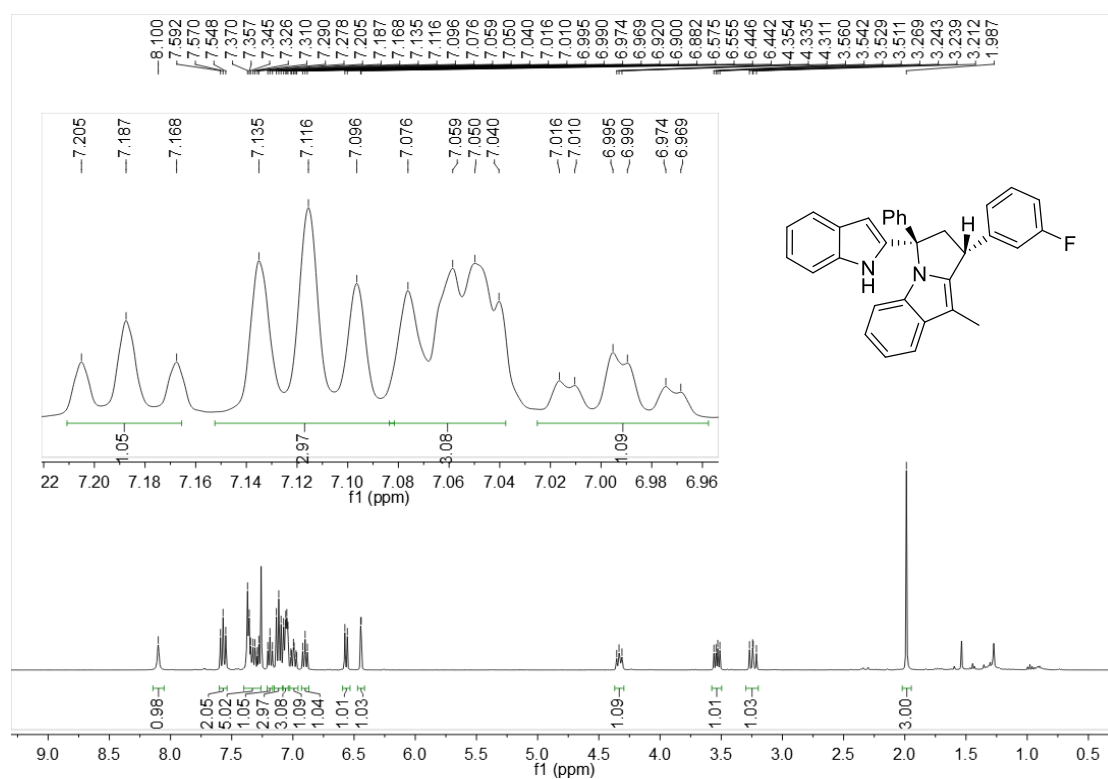

<sup>13</sup>C NMR (100 MHz, CDCl<sub>3</sub>) of compound **3ae**:

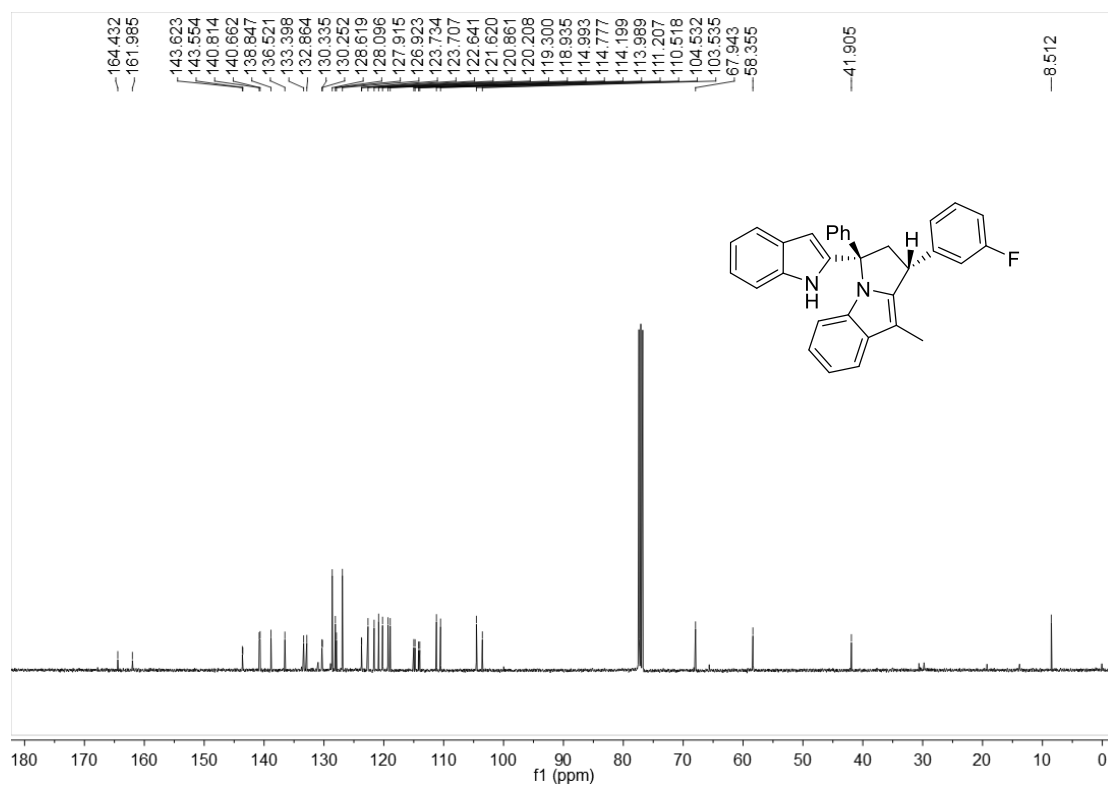

$^{19}\text{F}$  NMR (376 MHz,  $\text{CDCl}_3$ ) of compound **3ae**:

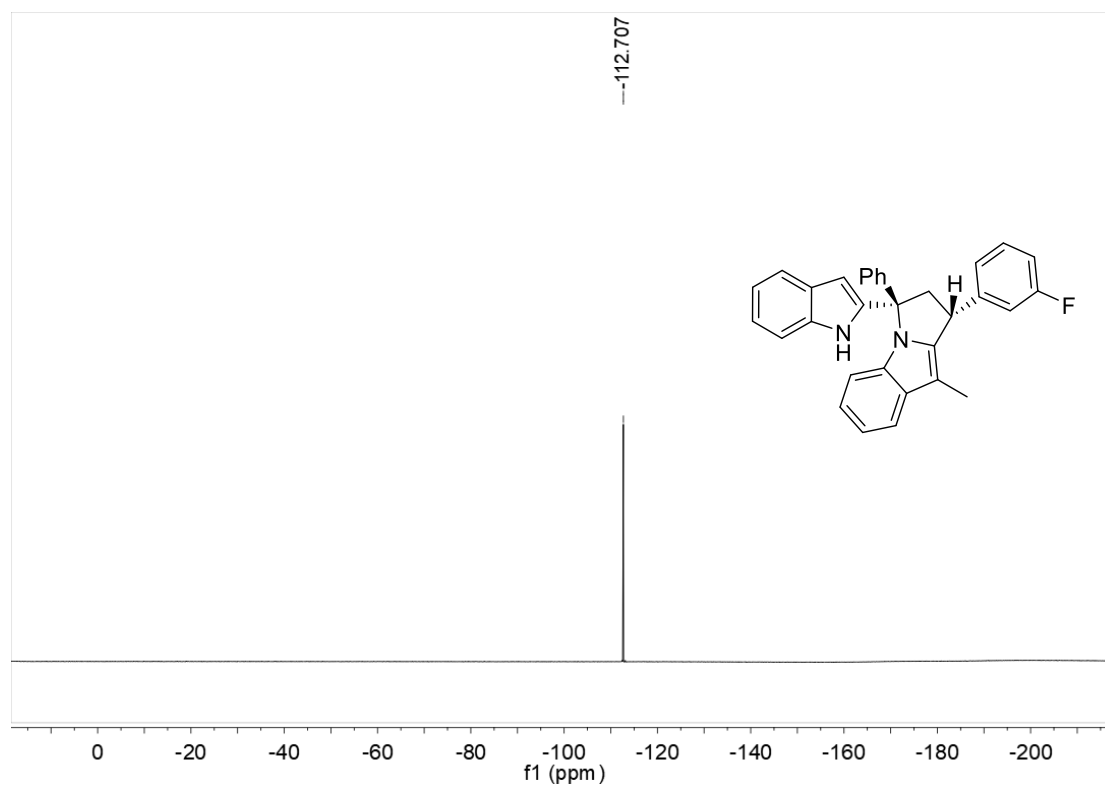

<sup>1</sup>H NMR (400 MHz, CDCl<sub>3</sub>) of compound **3af**:

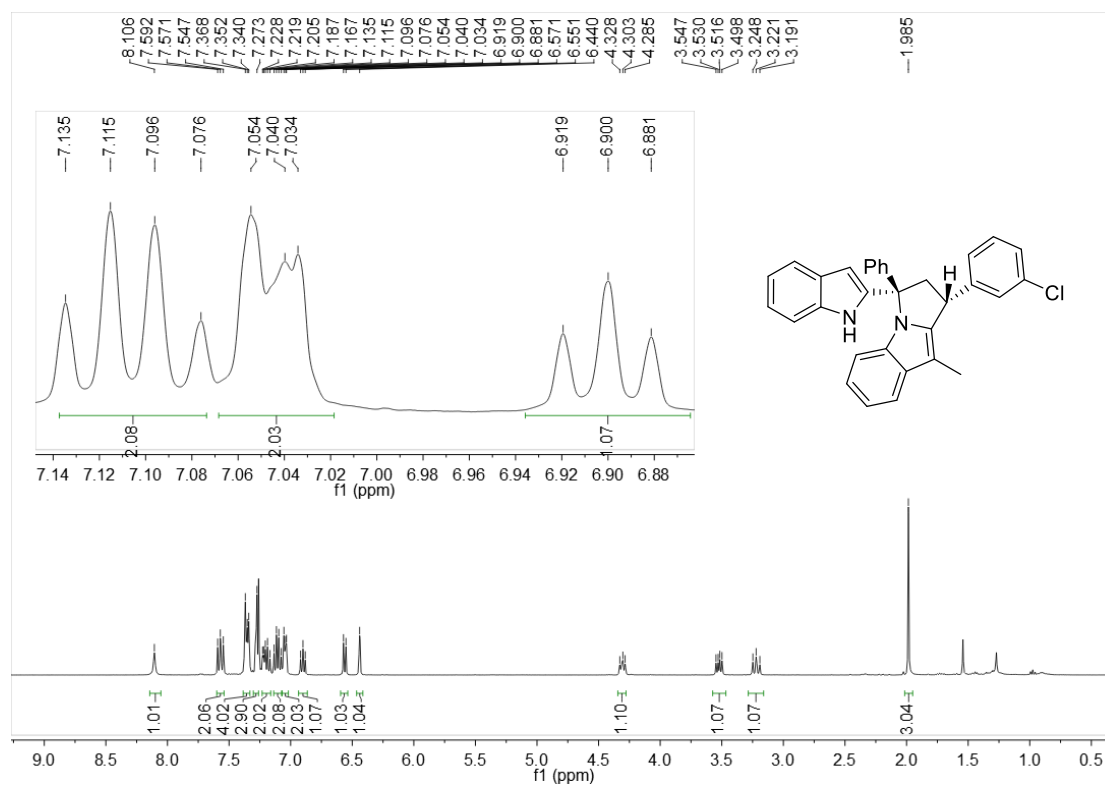

<sup>13</sup>C NMR (100 MHz, CDCl<sub>3</sub>) of compound **3af**:

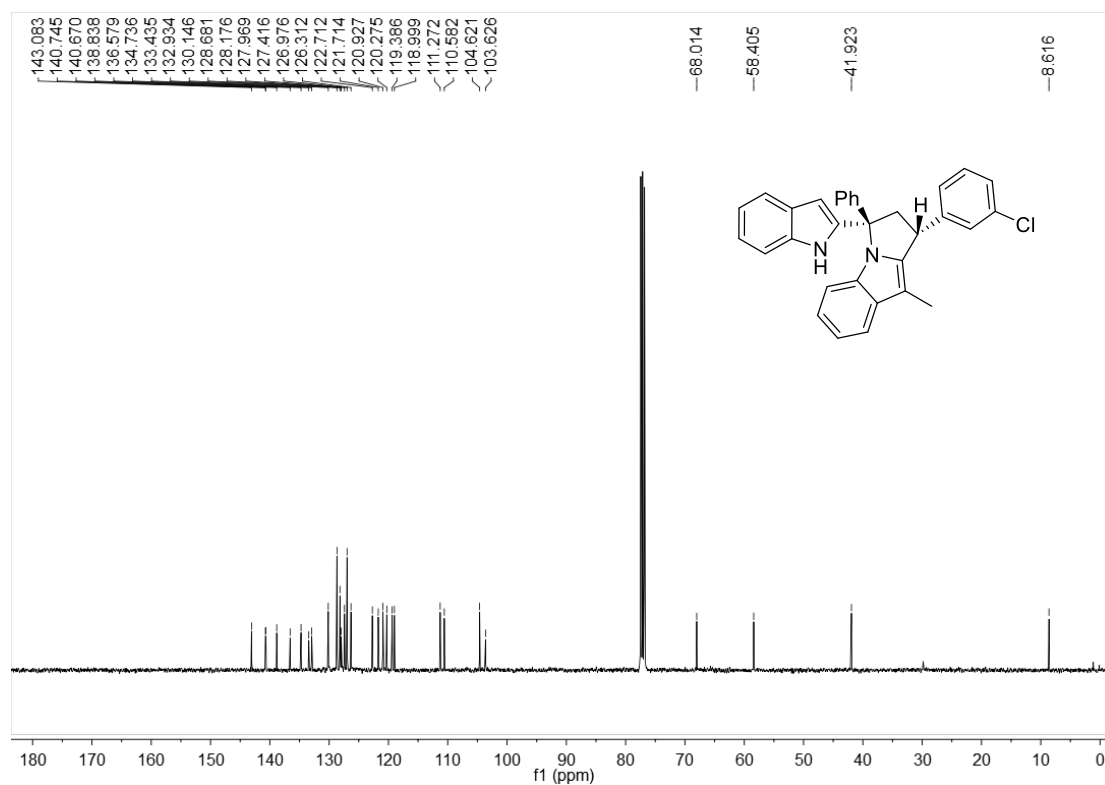

<sup>1</sup>H NMR (400 MHz, CDCl<sub>3</sub>) of compound **3ag**:

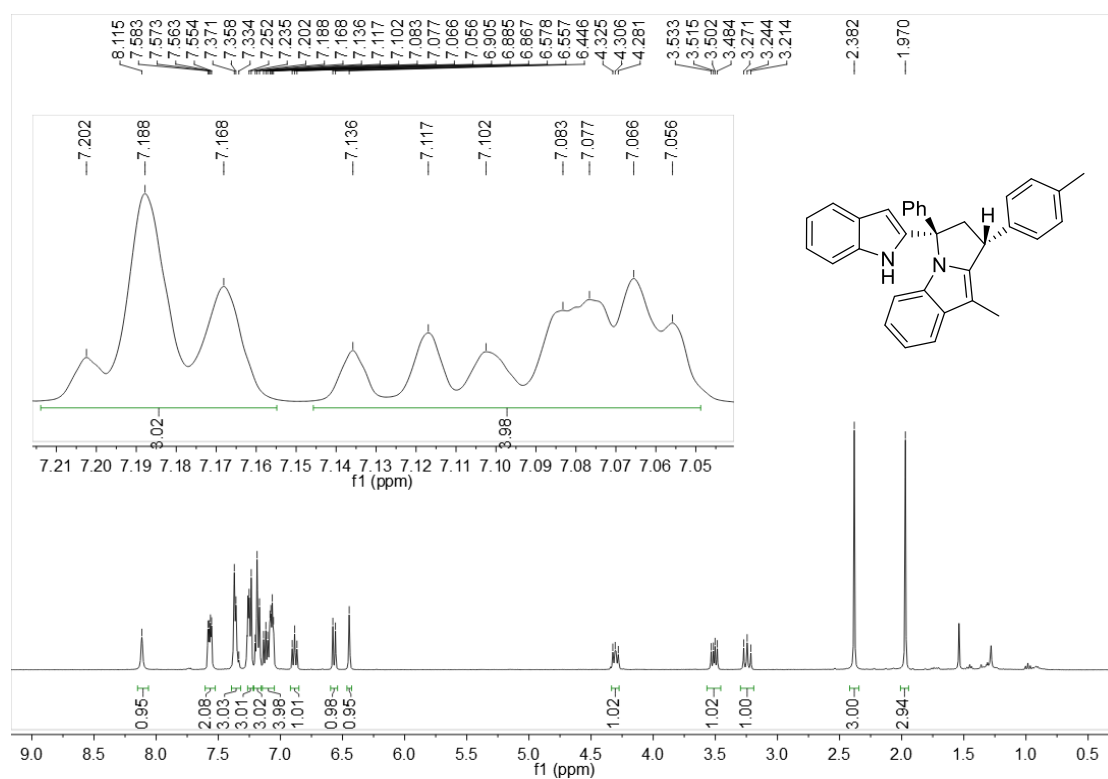

<sup>13</sup>C NMR (100 MHz, CDCl<sub>3</sub>) of compound **3ag**:

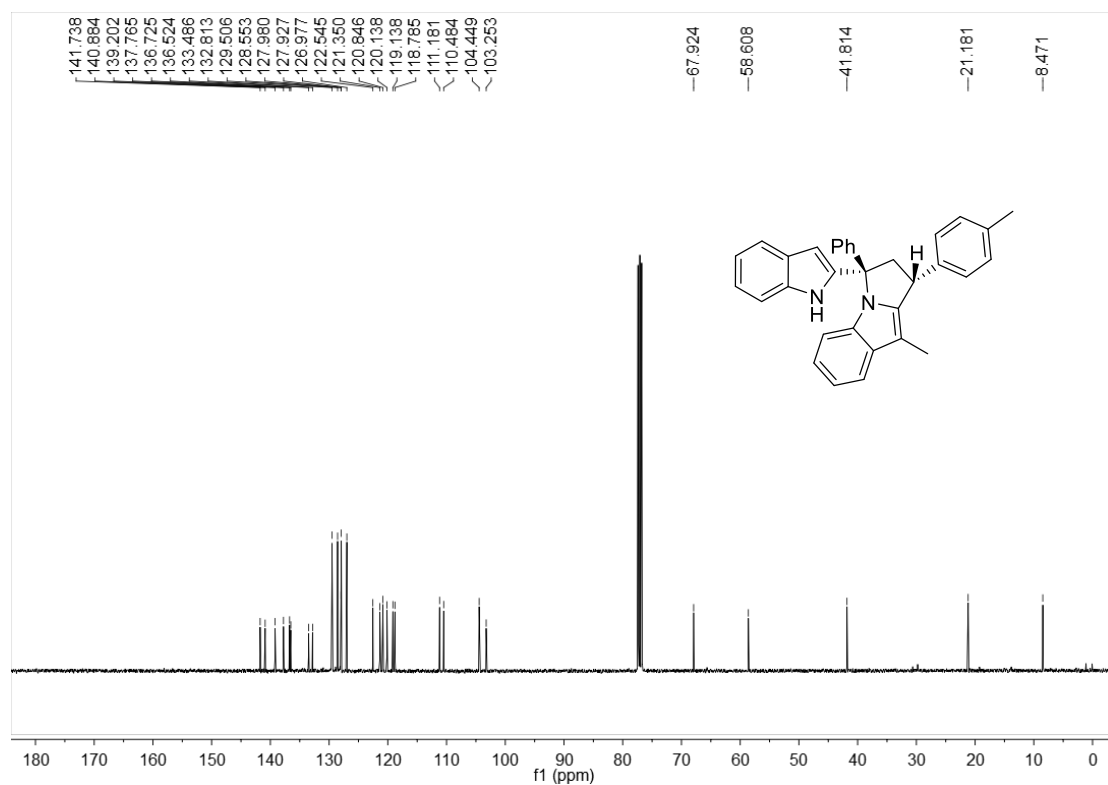

<sup>1</sup>H NMR (400 MHz, CDCl<sub>3</sub>) of compound **3ah**:

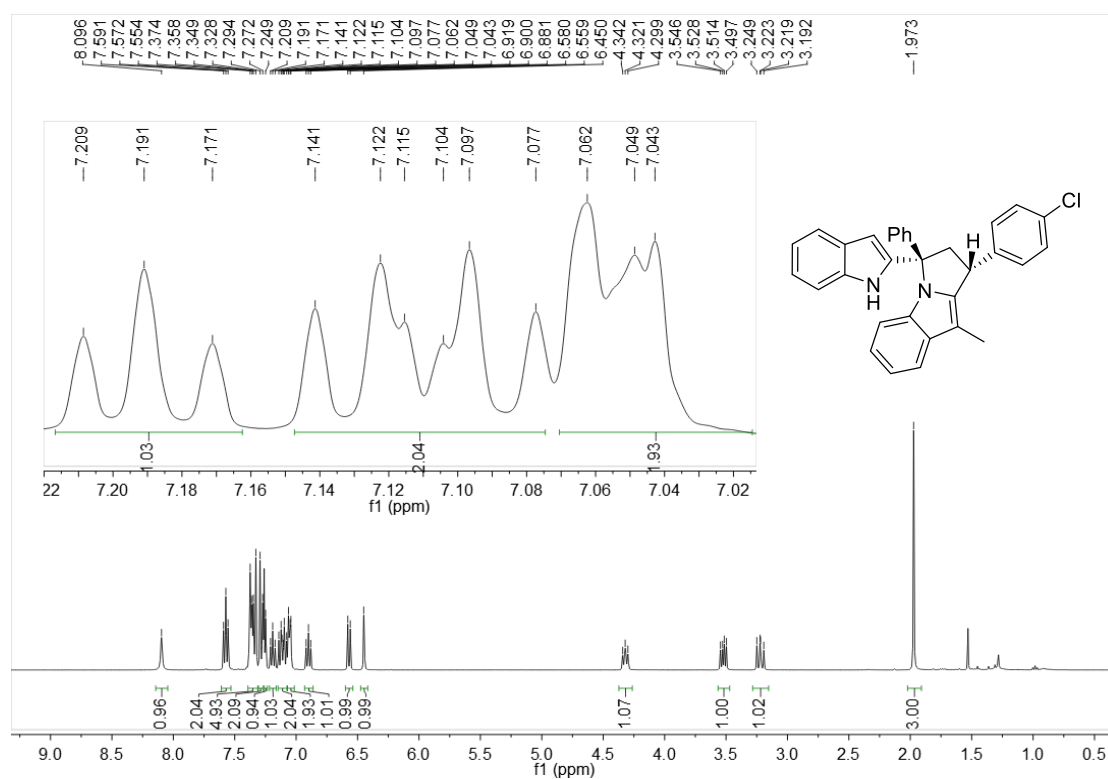

<sup>13</sup>C NMR (100 MHz, CDCl<sub>3</sub>) of compound **3ah**:

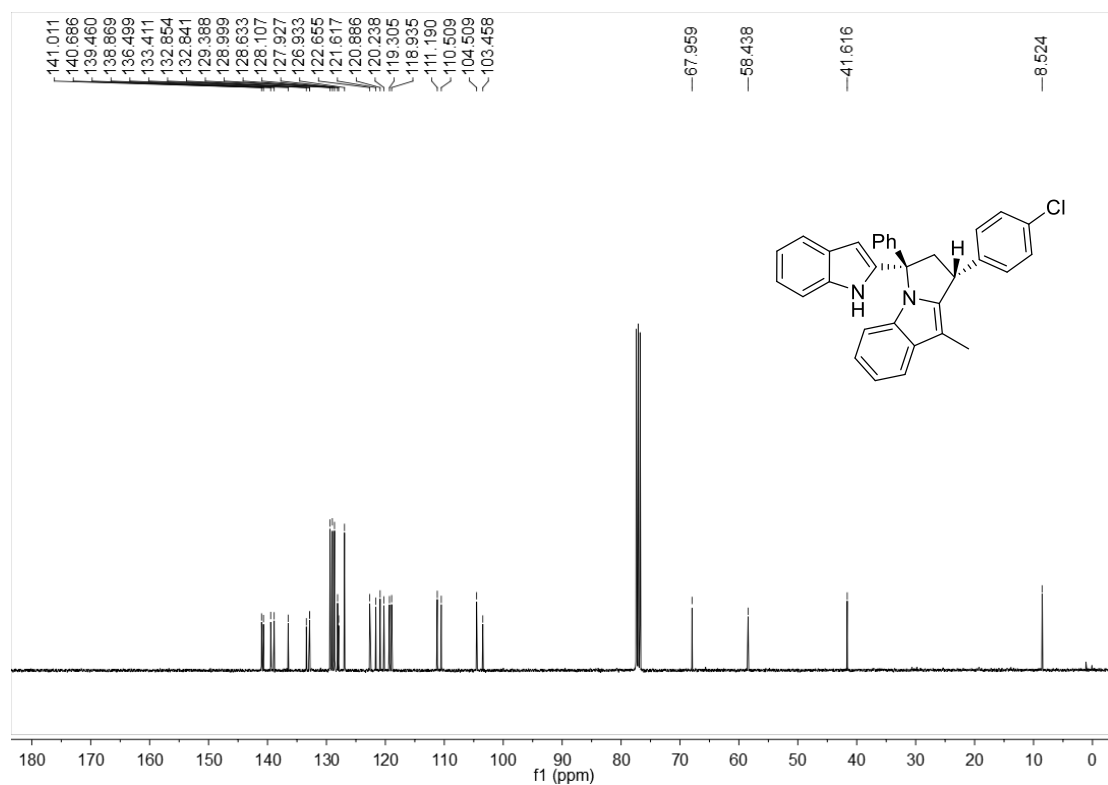

<sup>1</sup>H NMR (400 MHz, CDCl<sub>3</sub>) of compound **3ai**:

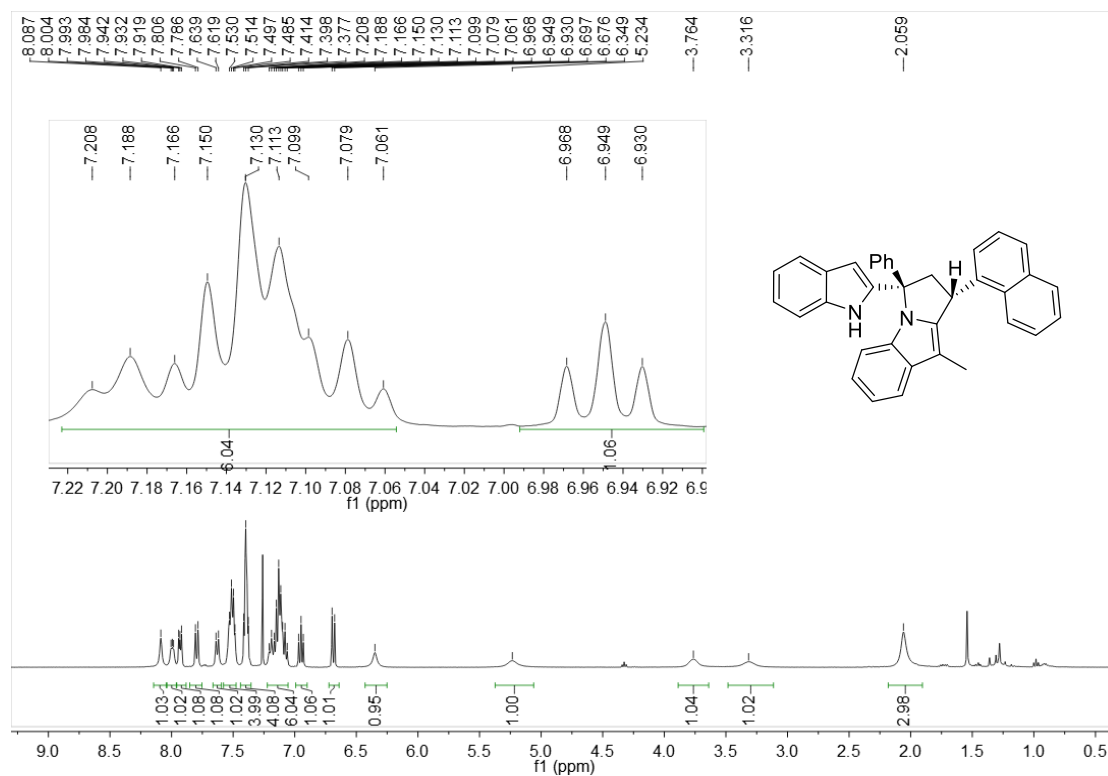

<sup>13</sup>C NMR (100 MHz, CDCl<sub>3</sub>) of compound **3ai**:

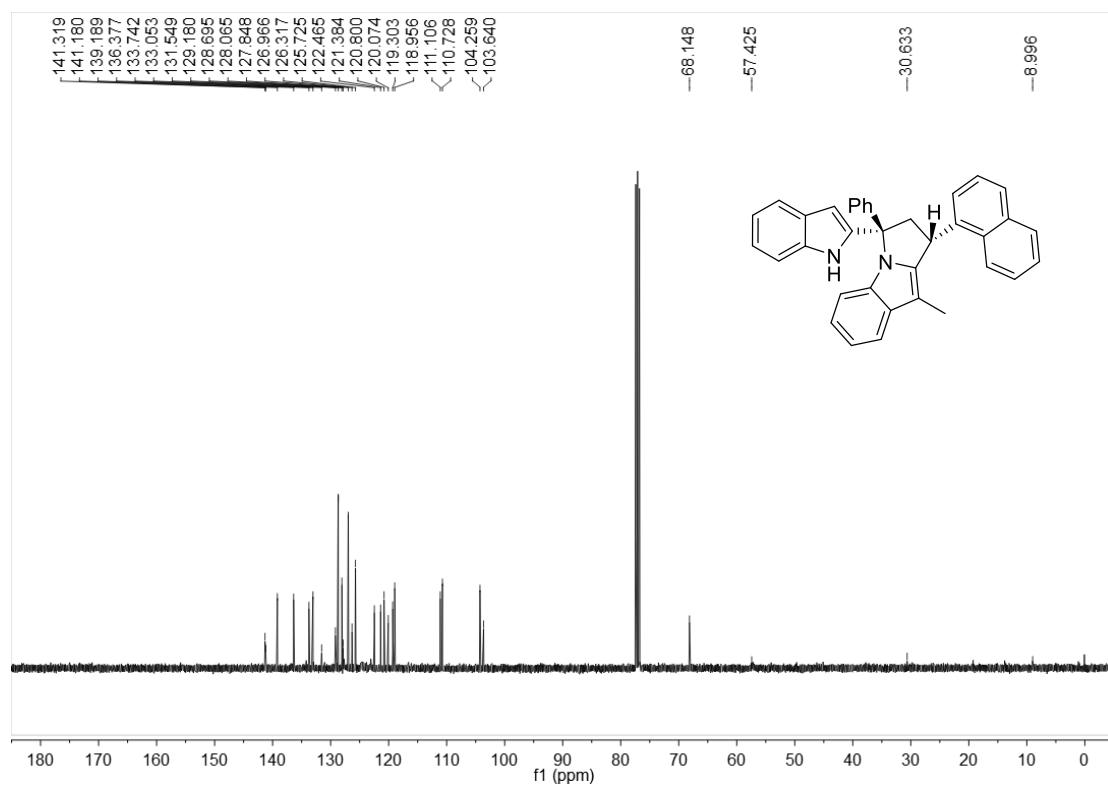



<sup>1</sup>H NMR (400 MHz, CDCl<sub>3</sub>) of compound **3aj**:

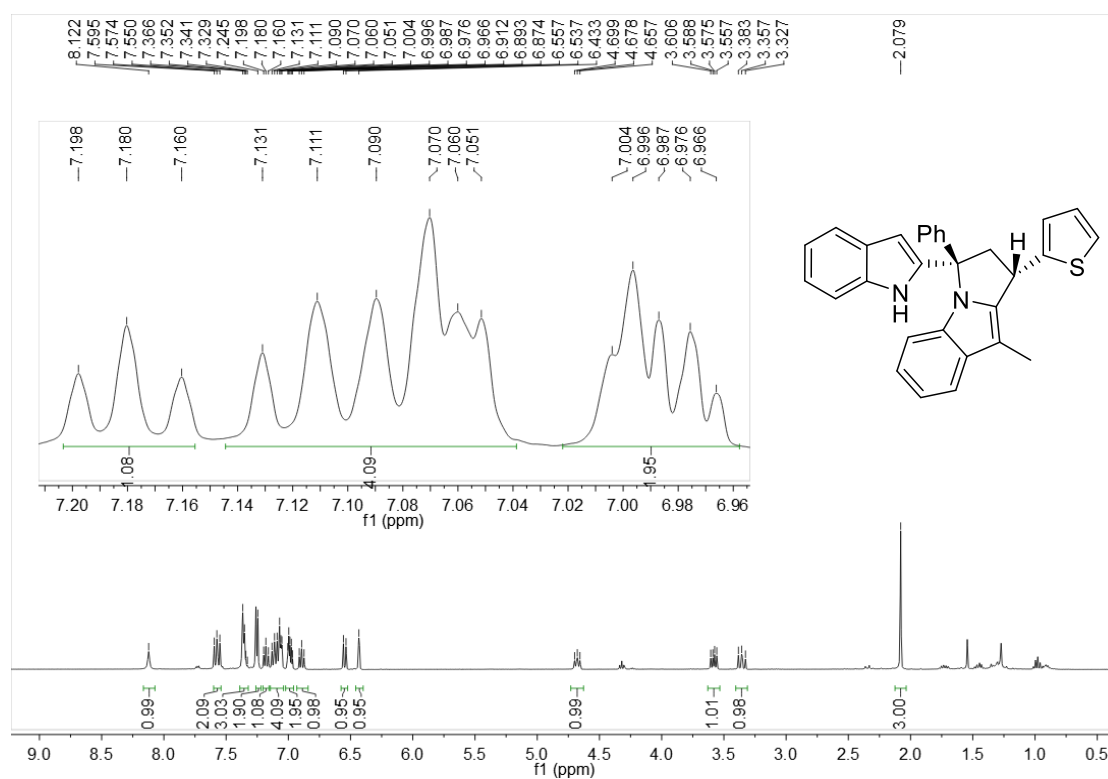

<sup>13</sup>C NMR (100 MHz, CDCl<sub>3</sub>) of compound **3aj**:

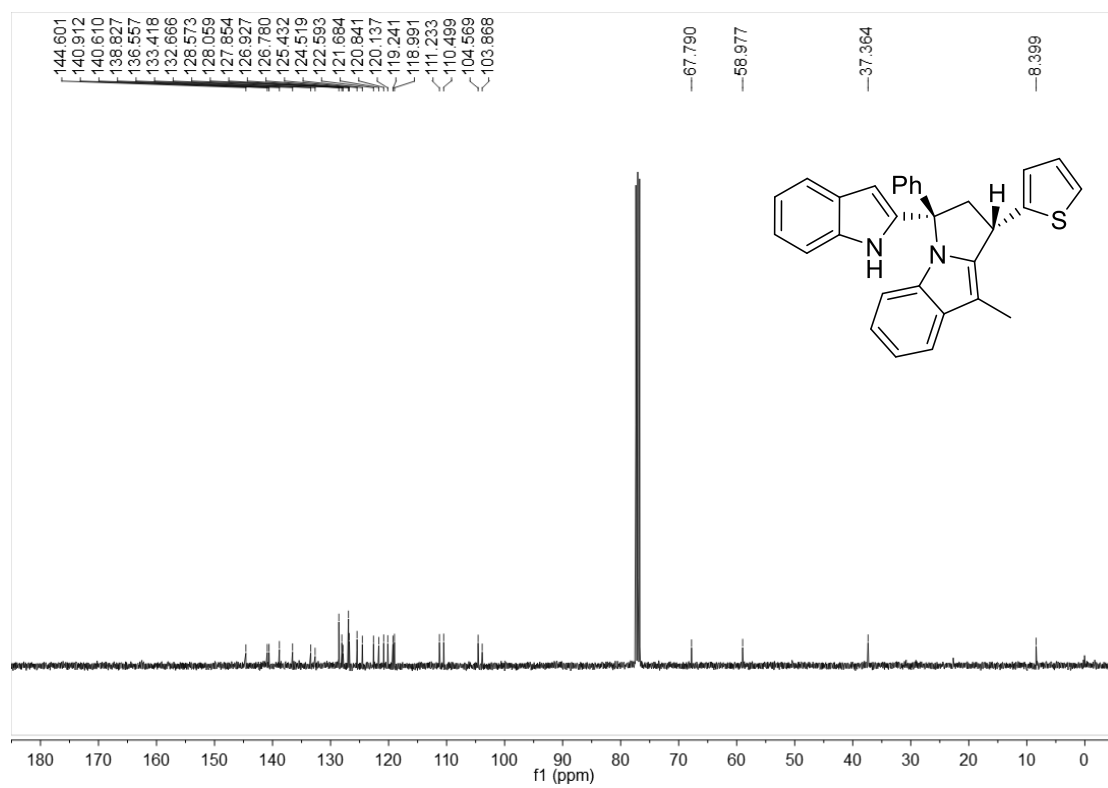

<sup>1</sup>H NMR (400 MHz, CDCl<sub>3</sub>) of compound **3ak**:

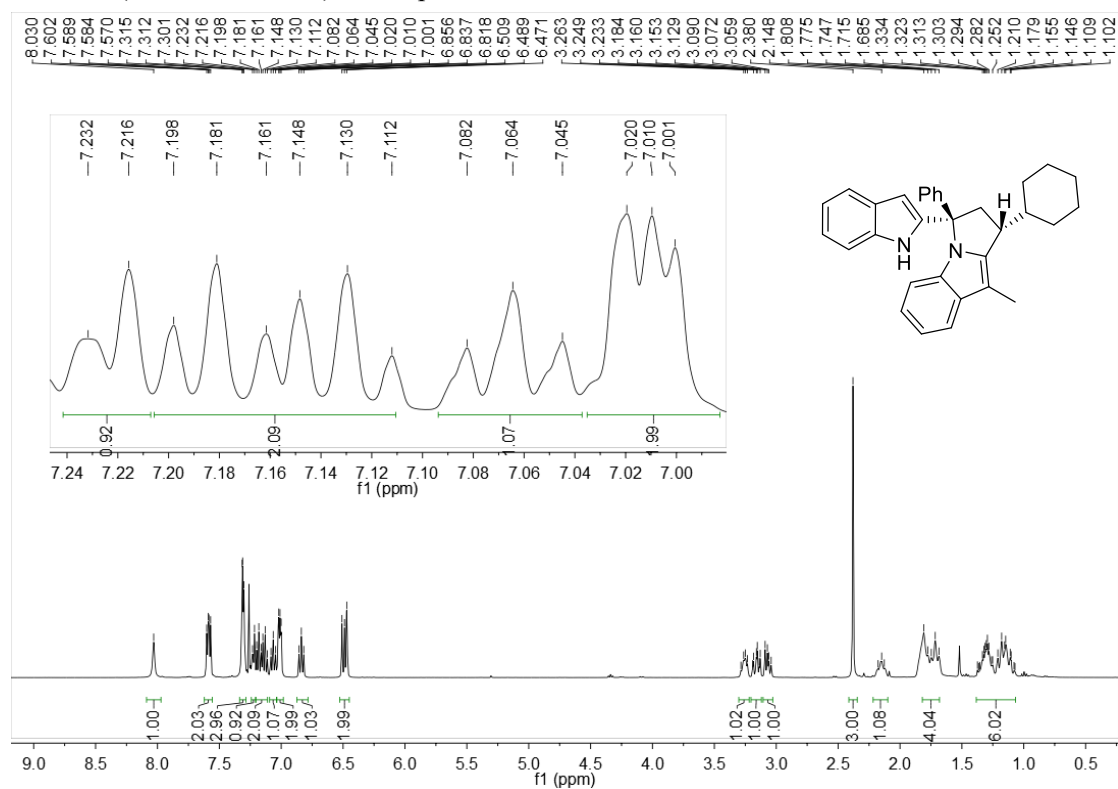

<sup>13</sup>C NMR (100 MHz, CDCl<sub>3</sub>) of compound **3ak**:

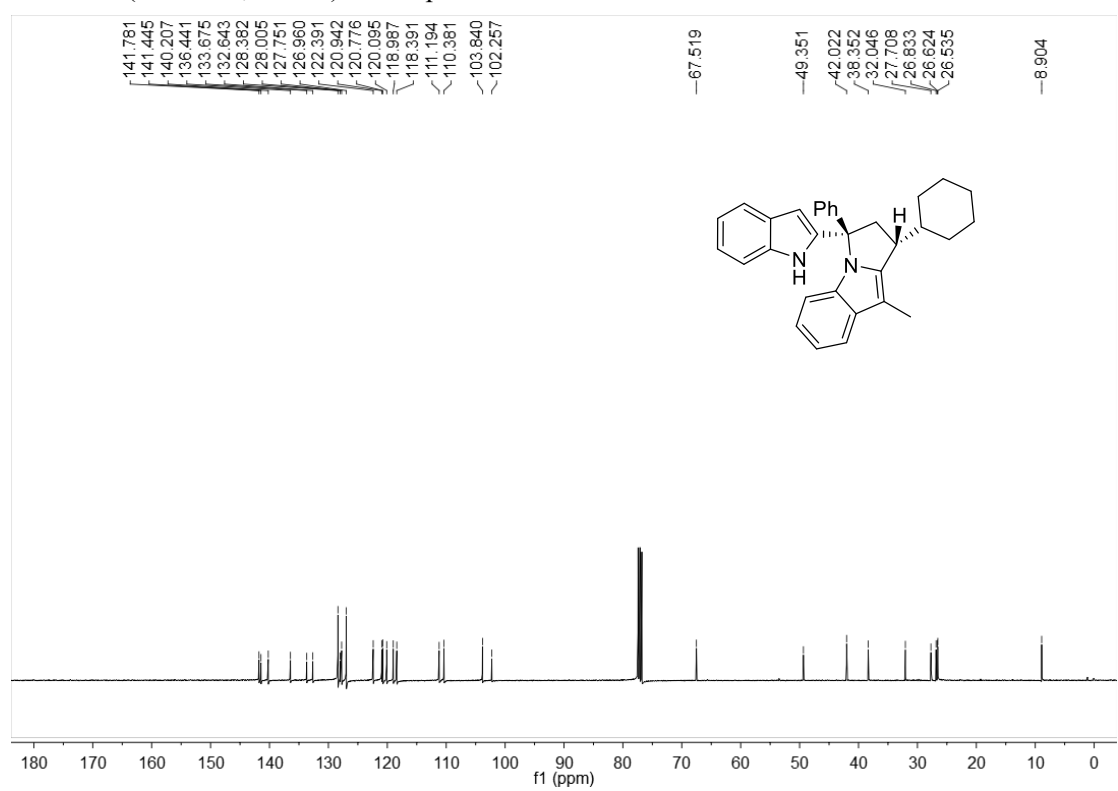

<sup>1</sup>H NMR (400 MHz, CDCl<sub>3</sub>) of compound **3al**:

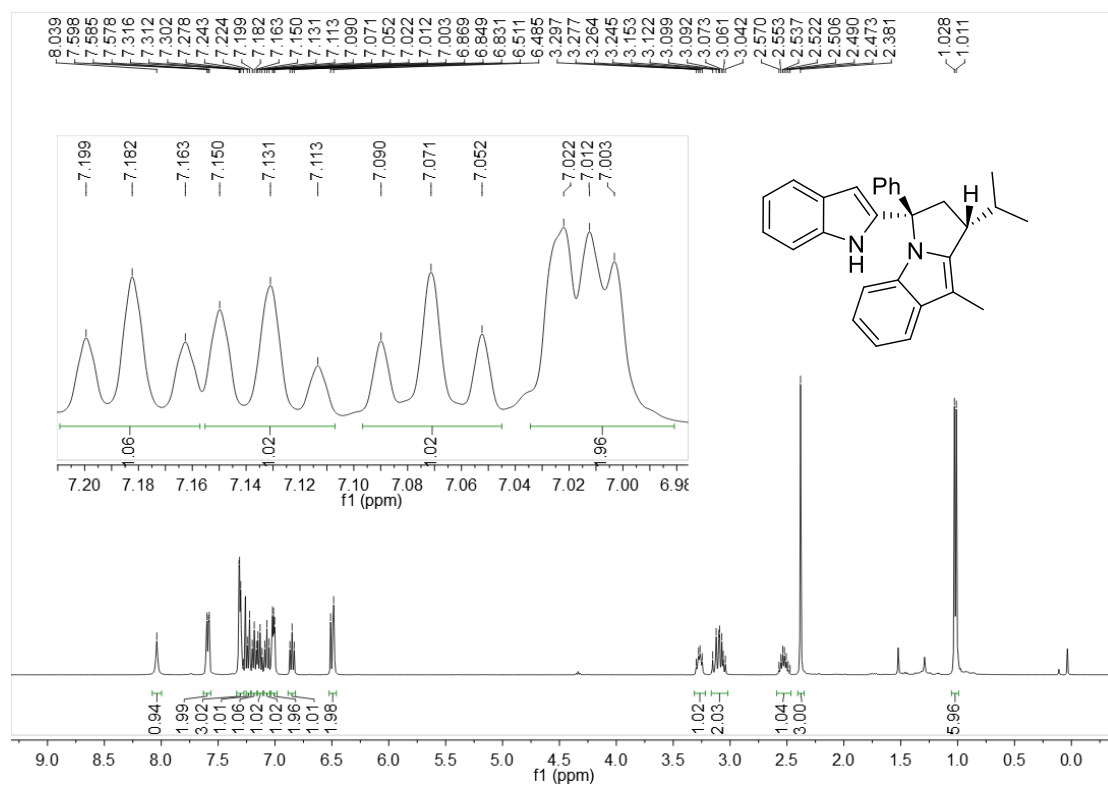

<sup>13</sup>C NMR (100 MHz, CDCl<sub>3</sub>) of compound **3al**:

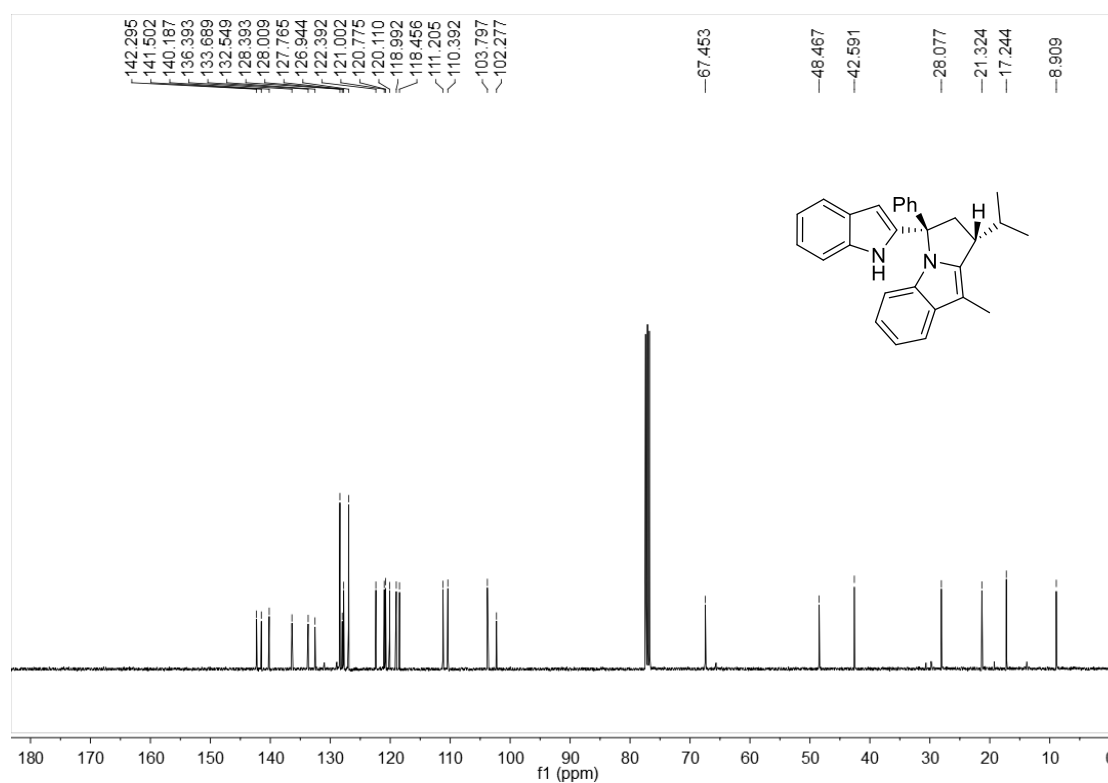

<sup>1</sup>H NMR (400 MHz, CDCl<sub>3</sub>) of compound **3am**:

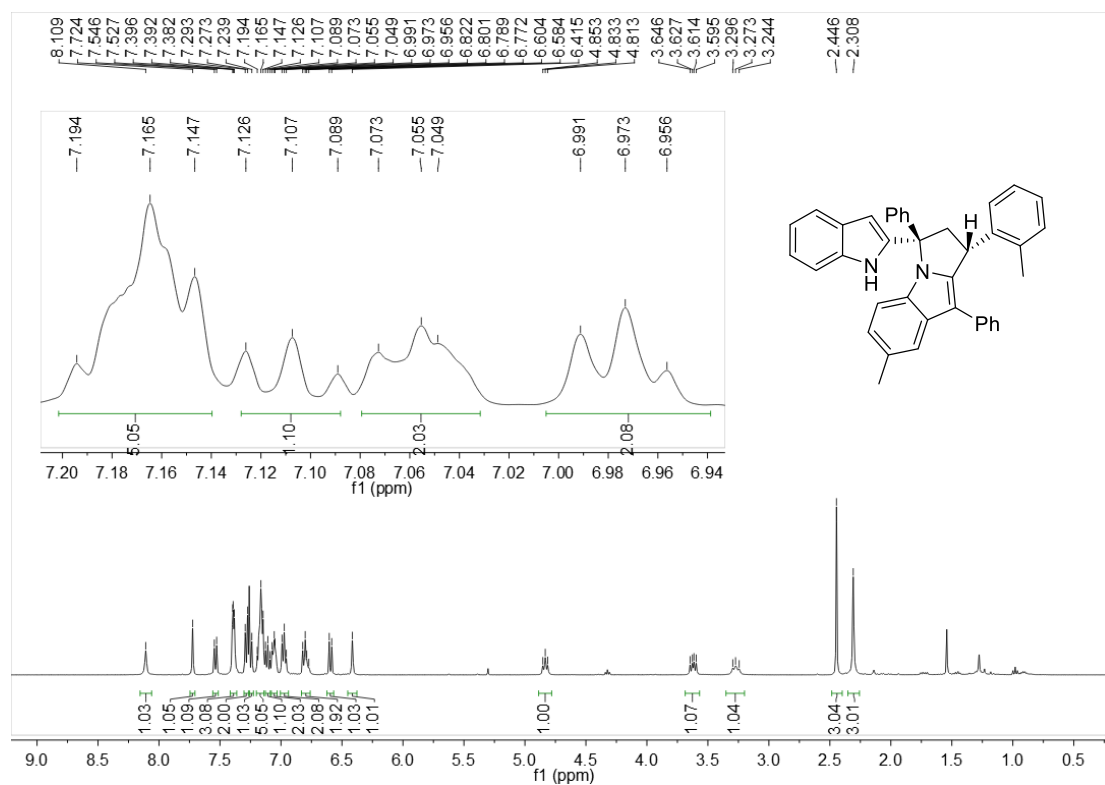

<sup>13</sup>C NMR (100 MHz, CDCl<sub>3</sub>) of compound **3am**:

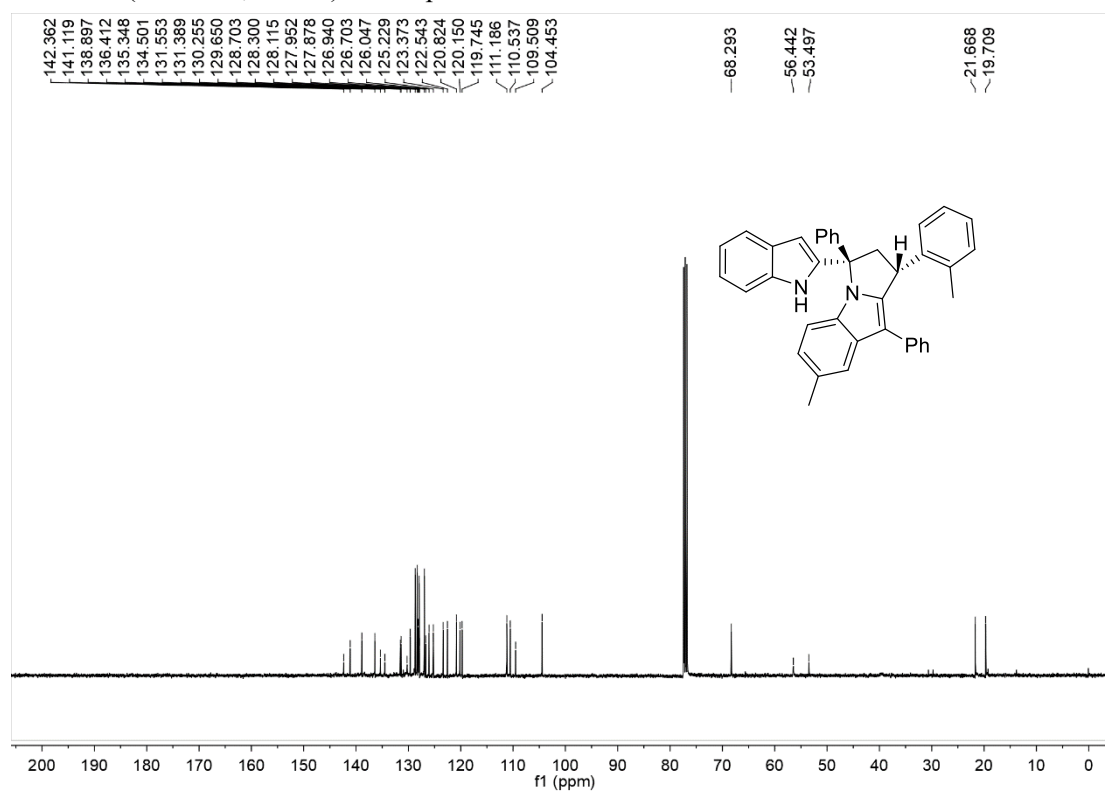

<sup>1</sup>H NMR (400 MHz, CDCl<sub>3</sub>) of compound **3an**:

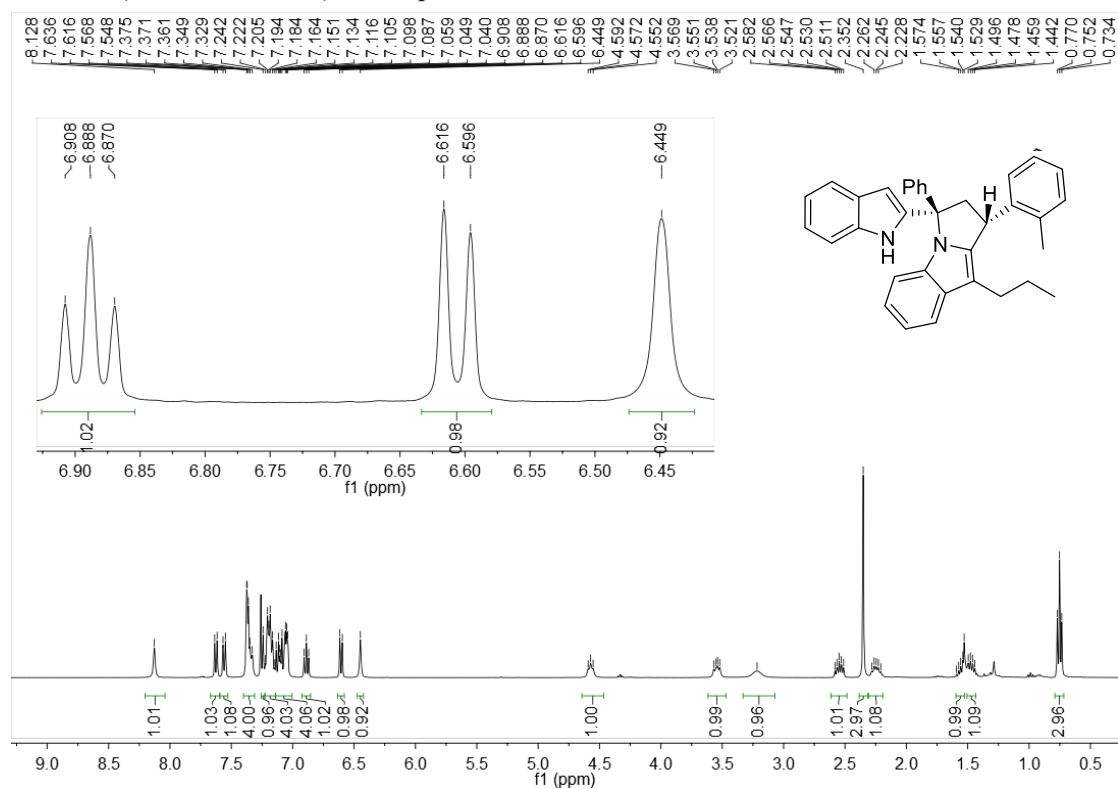

<sup>13</sup>C NMR (100 MHz, CDCl<sub>3</sub>) of compound **3an**:

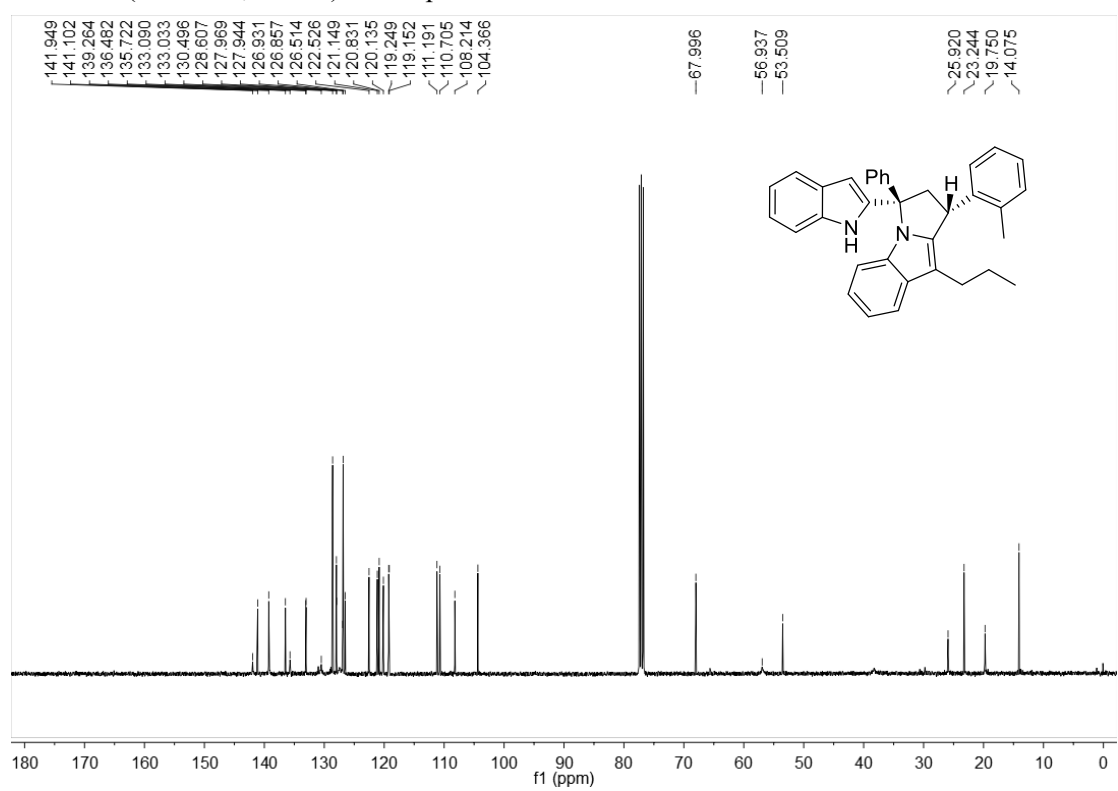

<sup>1</sup>H NMR (400 MHz, CDCl<sub>3</sub>) of compound **3ao**:

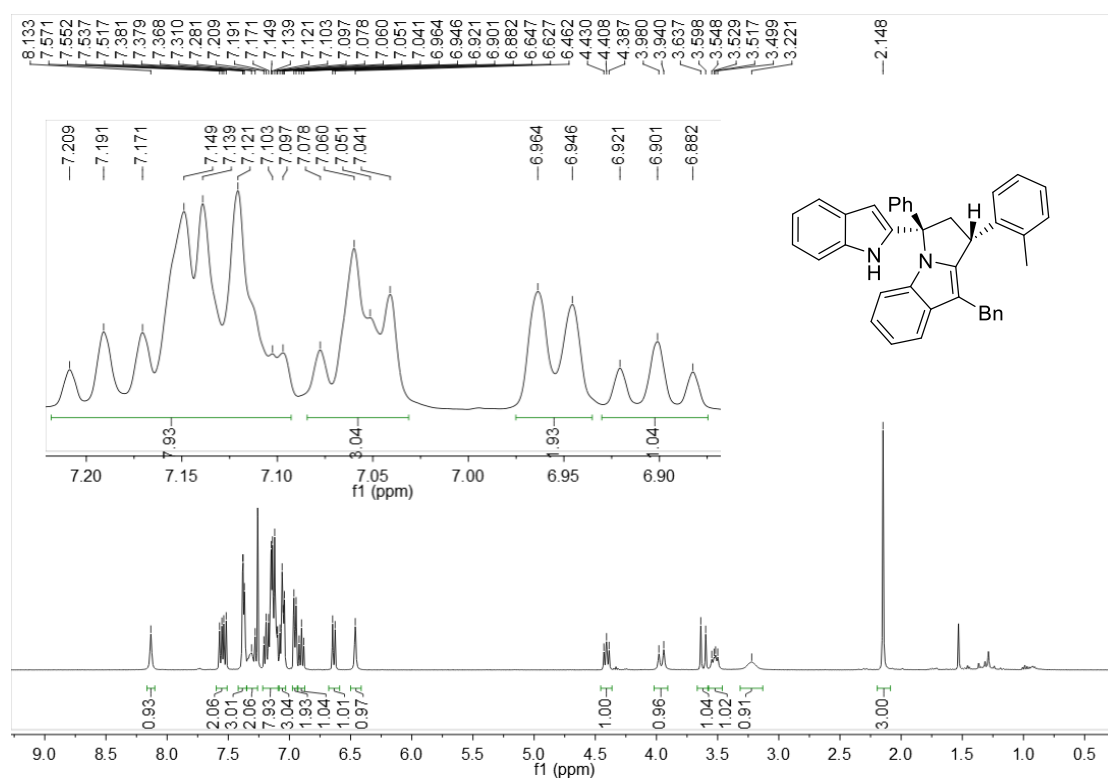

<sup>13</sup>C NMR (100 MHz, CDCl<sub>3</sub>) of compound **3ao**:

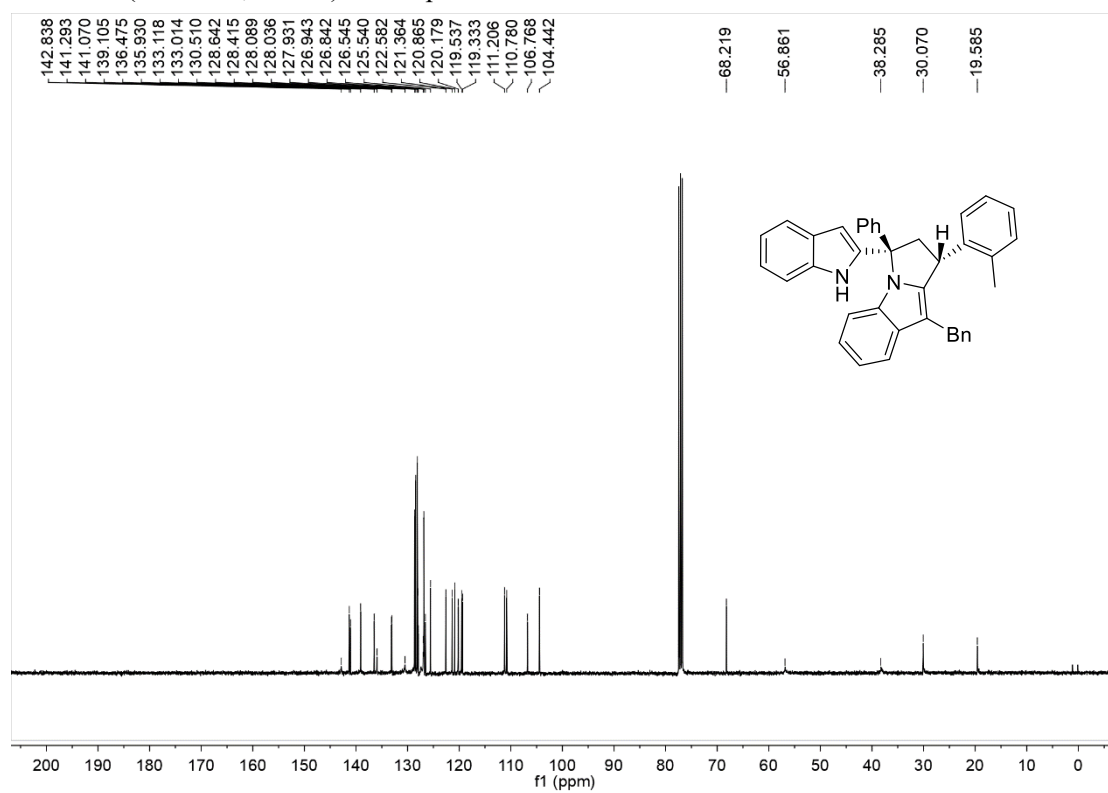

<sup>1</sup>H NMR (400 MHz, CDCl<sub>3</sub>) of compound **3ba**:

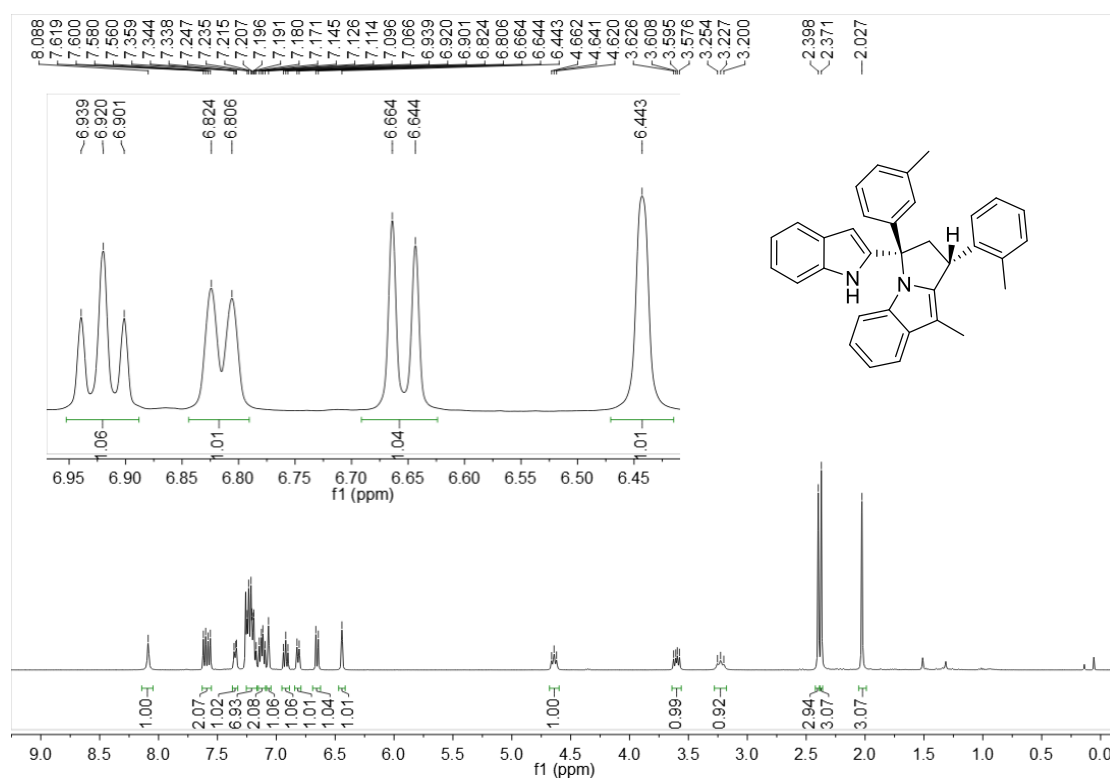

<sup>13</sup>C NMR (100 MHz, CDCl<sub>3</sub>) of compound **3ba**:

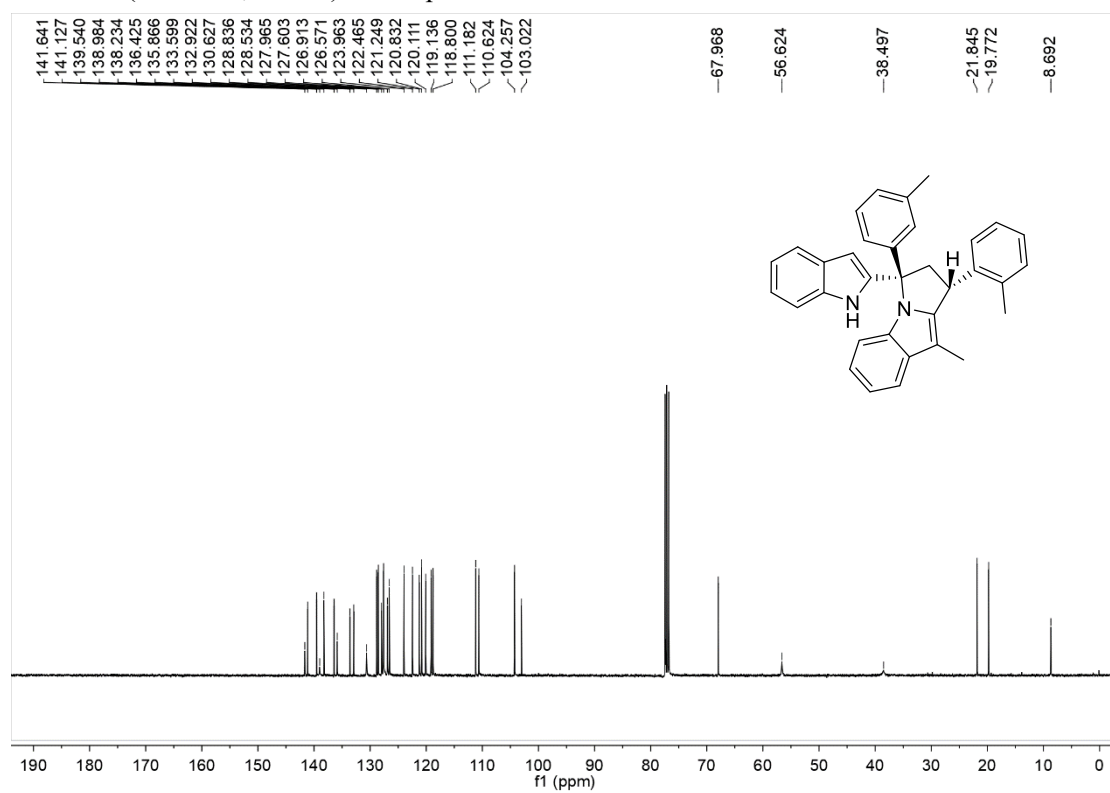

<sup>1</sup>H NMR (400 MHz, CDCl<sub>3</sub>) of compound **3ca**:

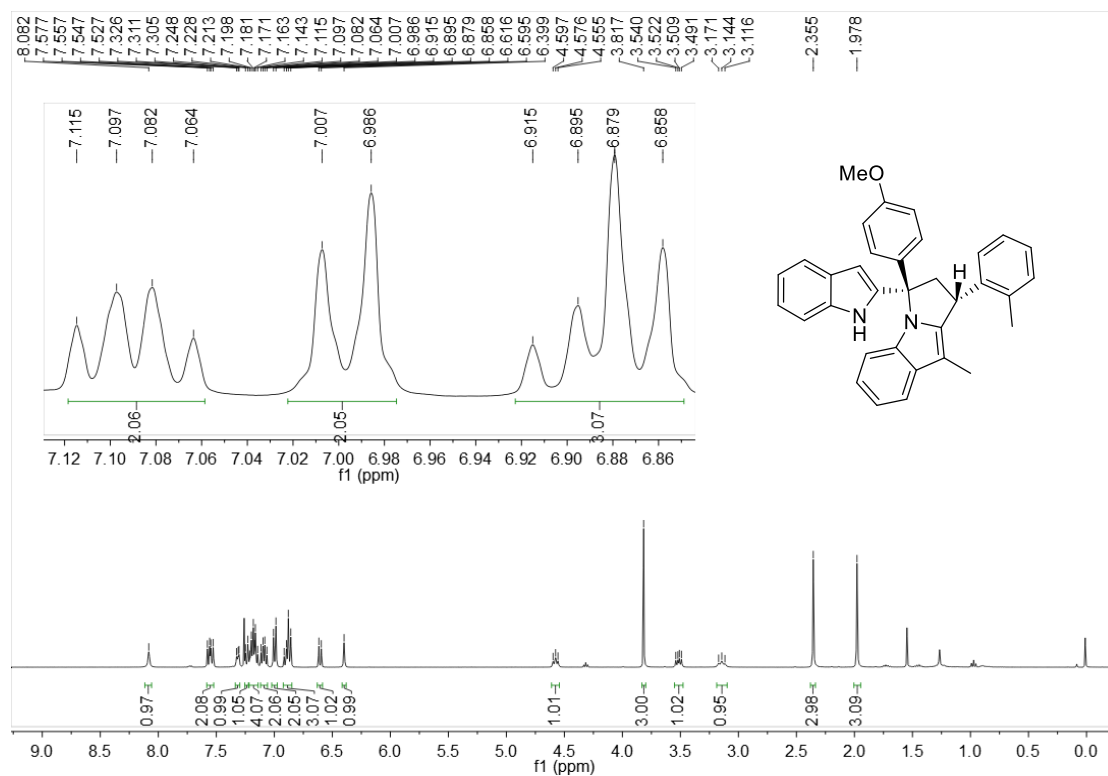

<sup>13</sup>C NMR (100 MHz, CDCl<sub>3</sub>) of compound **3ca**:

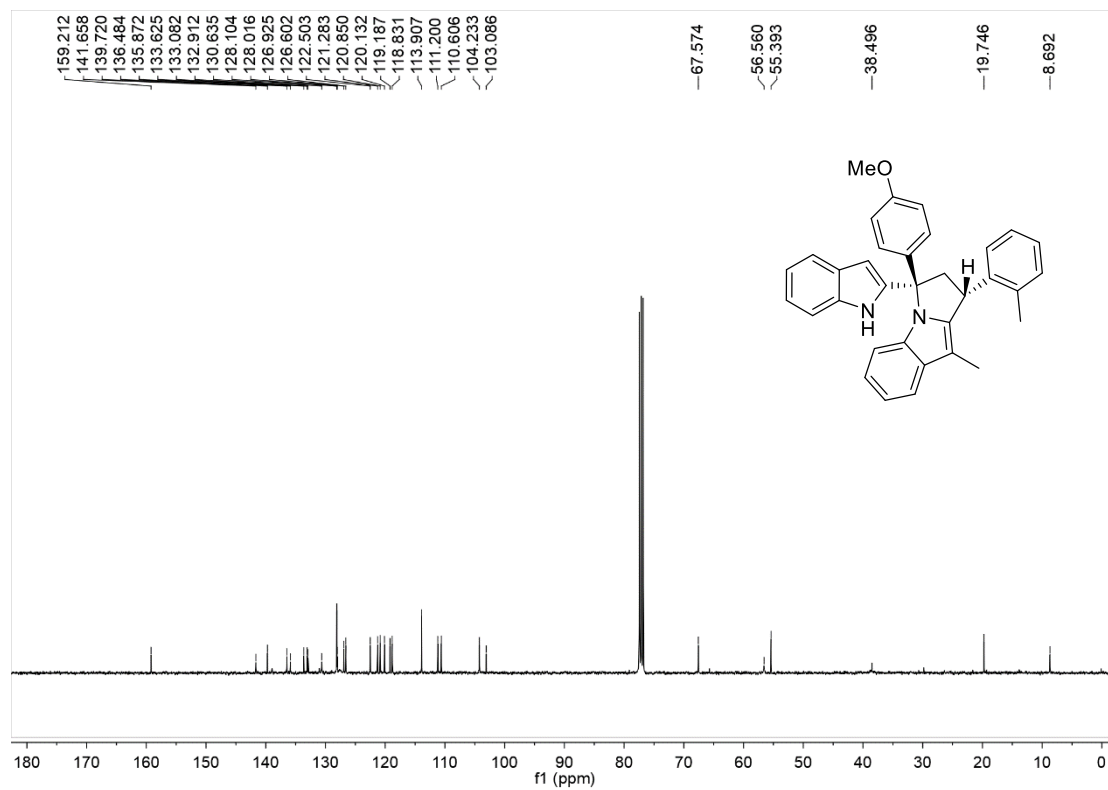



<sup>1</sup>H NMR (400 MHz, CDCl<sub>3</sub>) of compound **3da**:

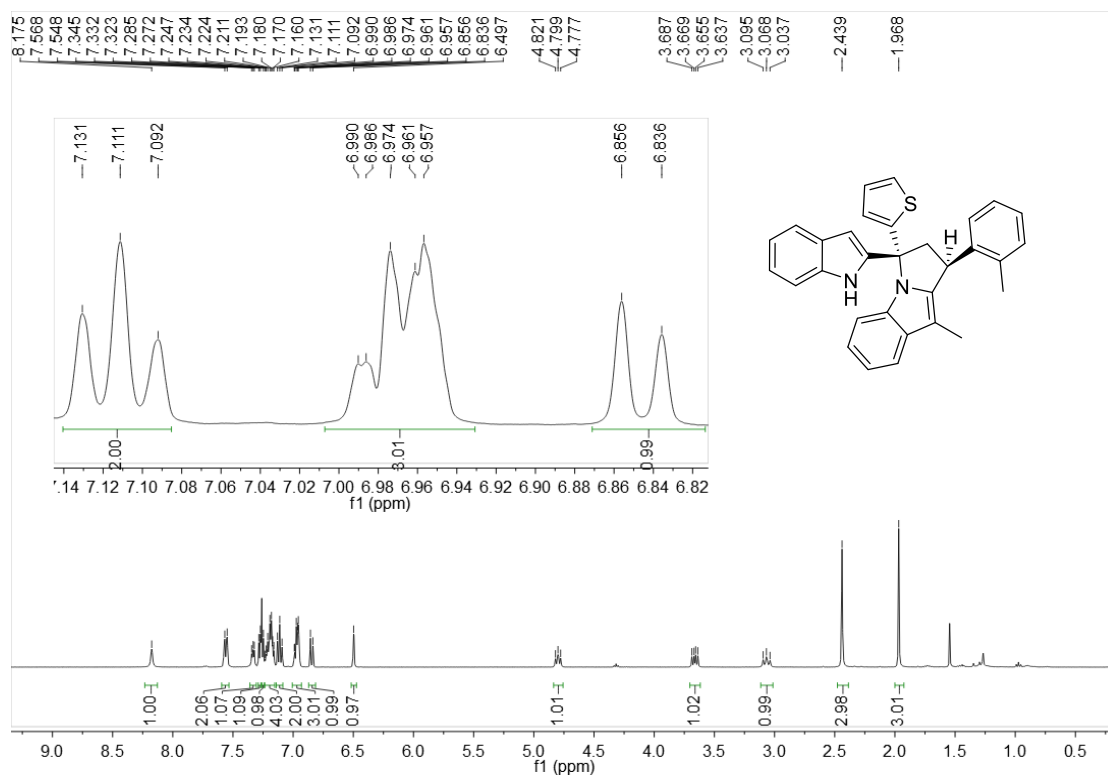

<sup>13</sup>C NMR (100 MHz, CDCl<sub>3</sub>) of compound **3da**:

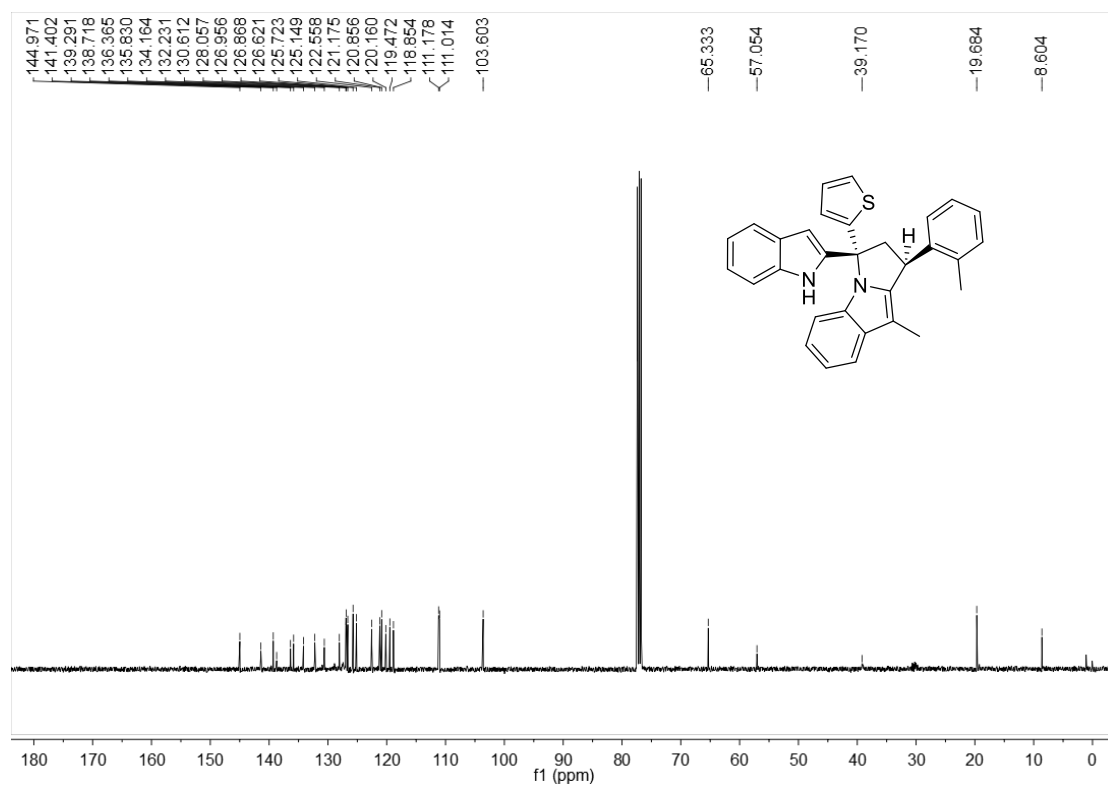

<sup>1</sup>H NMR (400 MHz, CDCl<sub>3</sub>) of compound **3ea**:

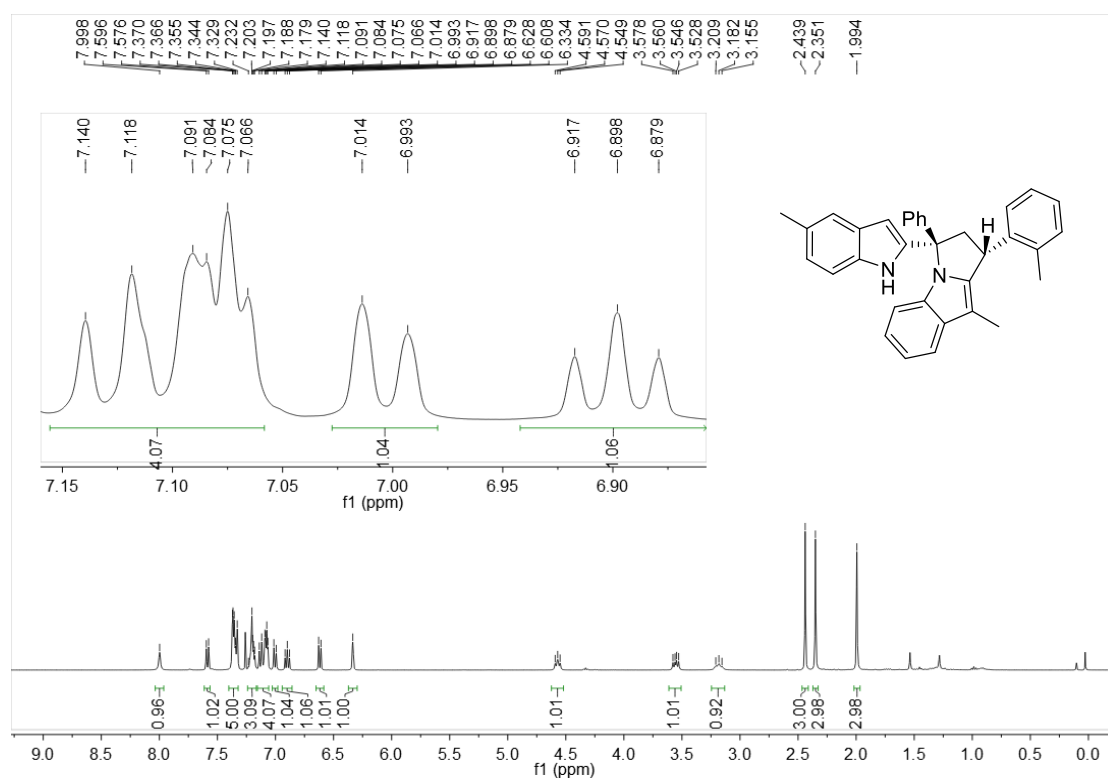

<sup>13</sup>C NMR (100 MHz, CDCl<sub>3</sub>) of compound **3ea**:

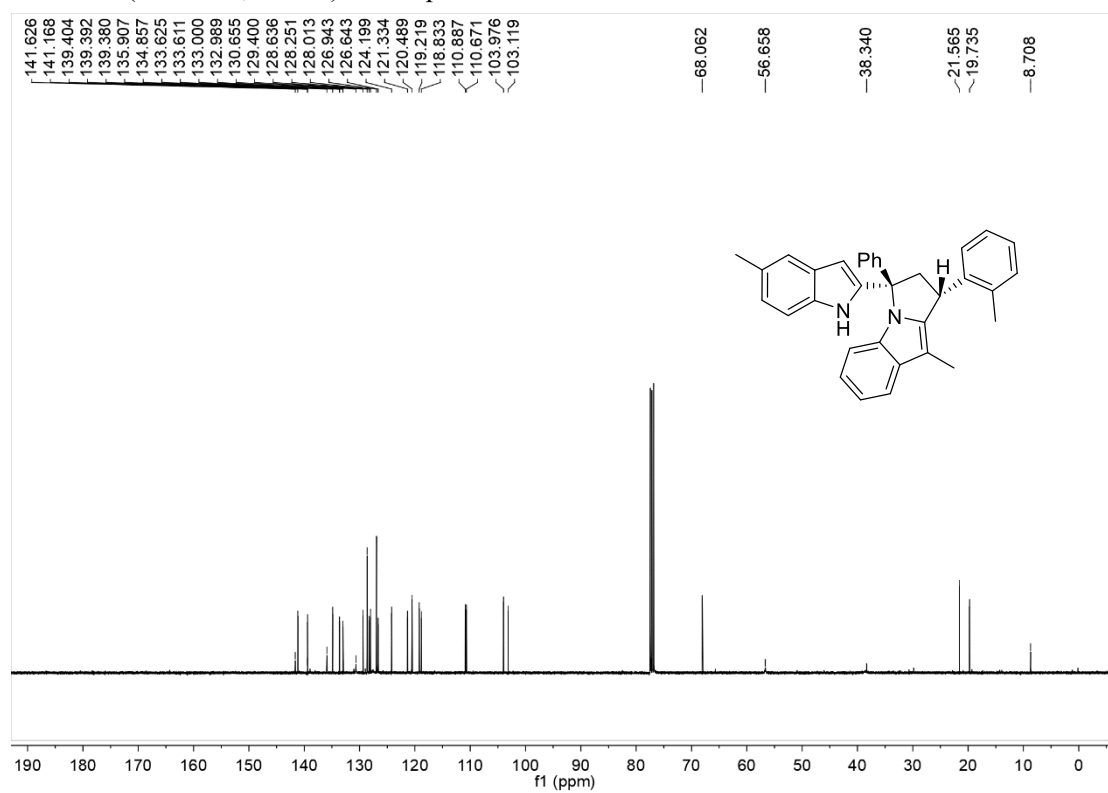

$^1\text{H}$  NMR (400 MHz,  $\text{CDCl}_3$ ) of compound **3fa**:

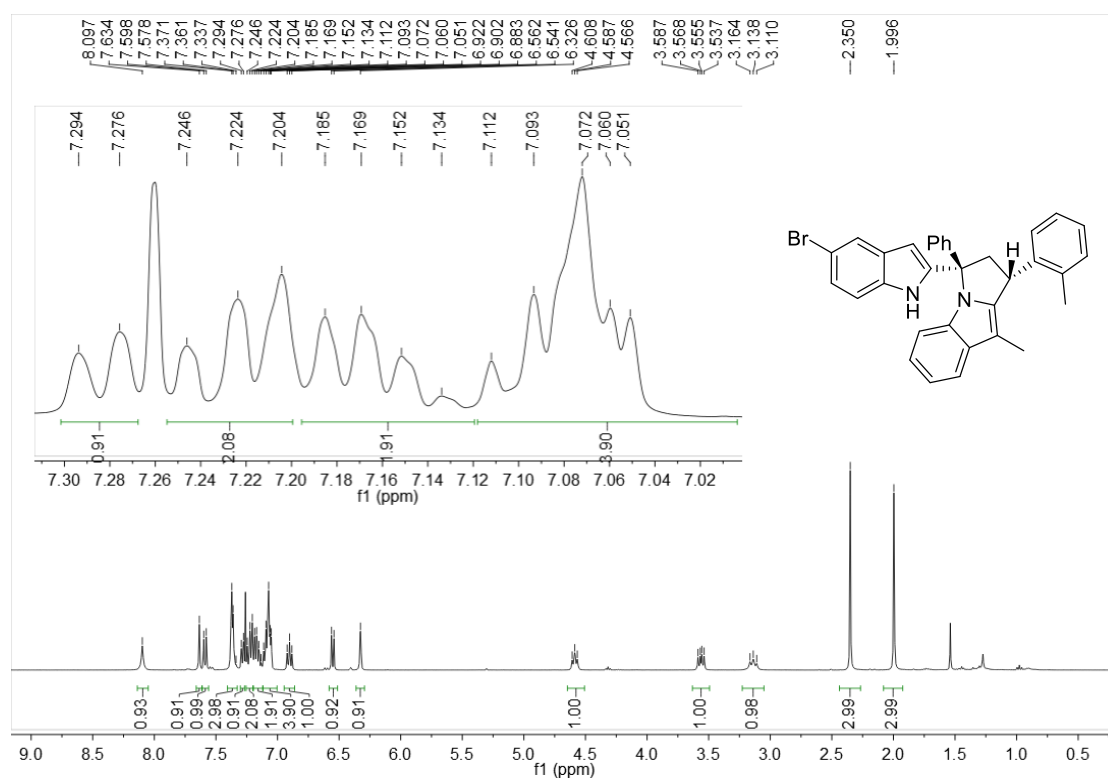

$^{13}\text{C}$  NMR (100 MHz,  $\text{CDCl}_3$ ) of compound **3fa**:

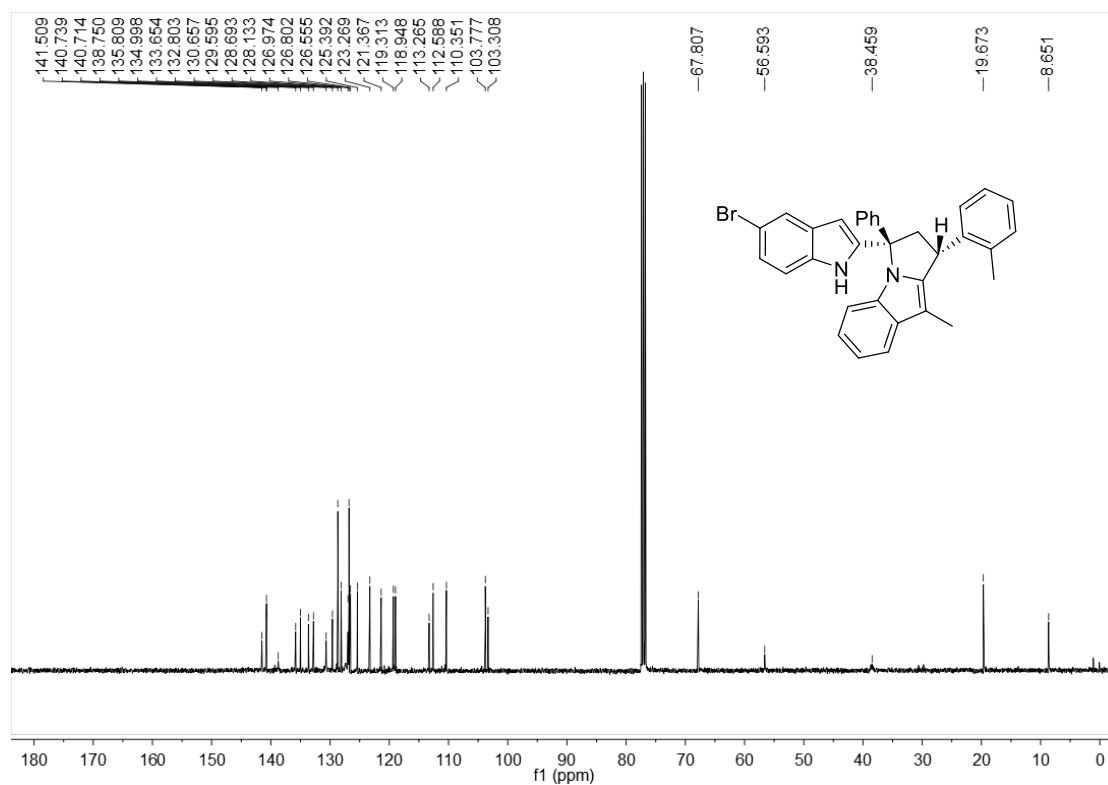

<sup>1</sup>H NMR (400 MHz, CDCl<sub>3</sub>) of compound **3ga**:

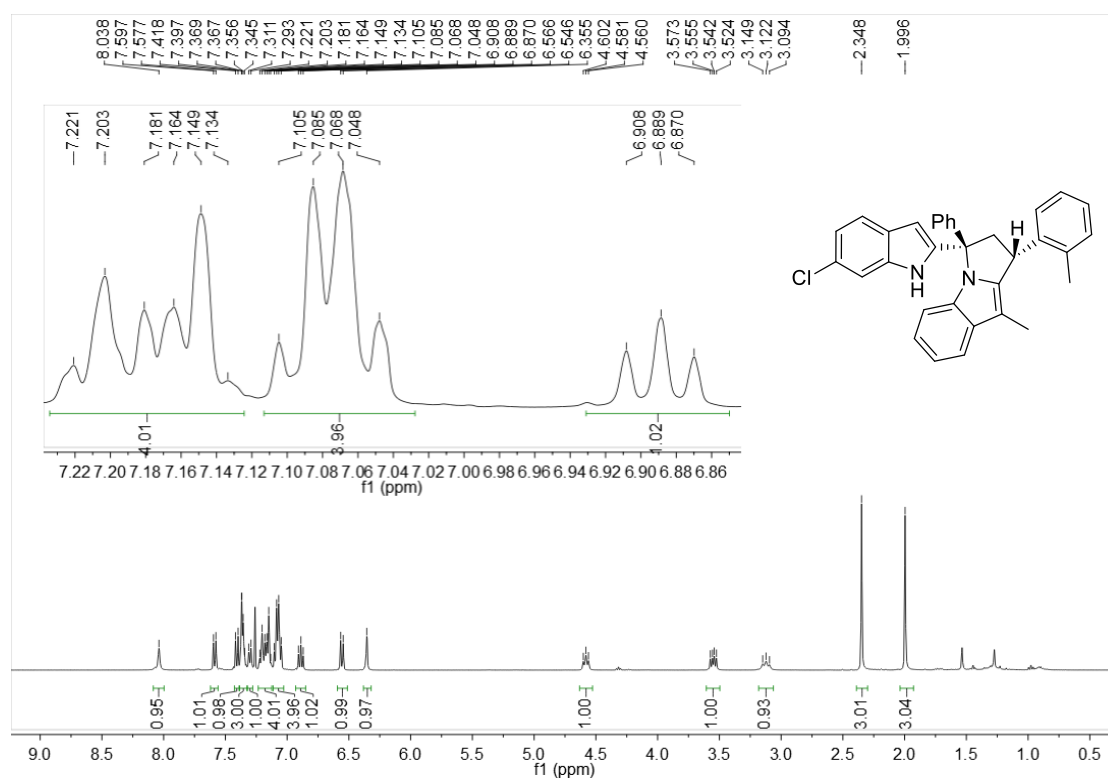

<sup>13</sup>C NMR (100 MHz, CDCl<sub>3</sub>) of compound **3ga**:

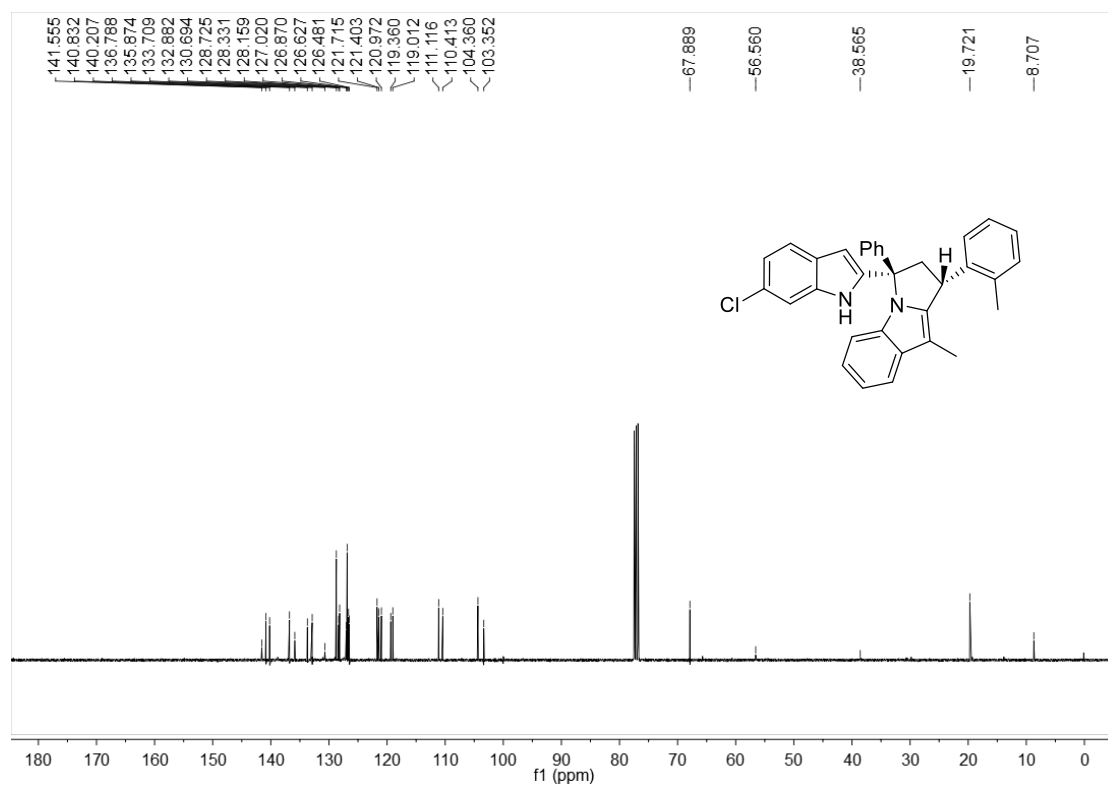

<sup>1</sup>H NMR (400 MHz, CDCl<sub>3</sub>) of compound **6**:

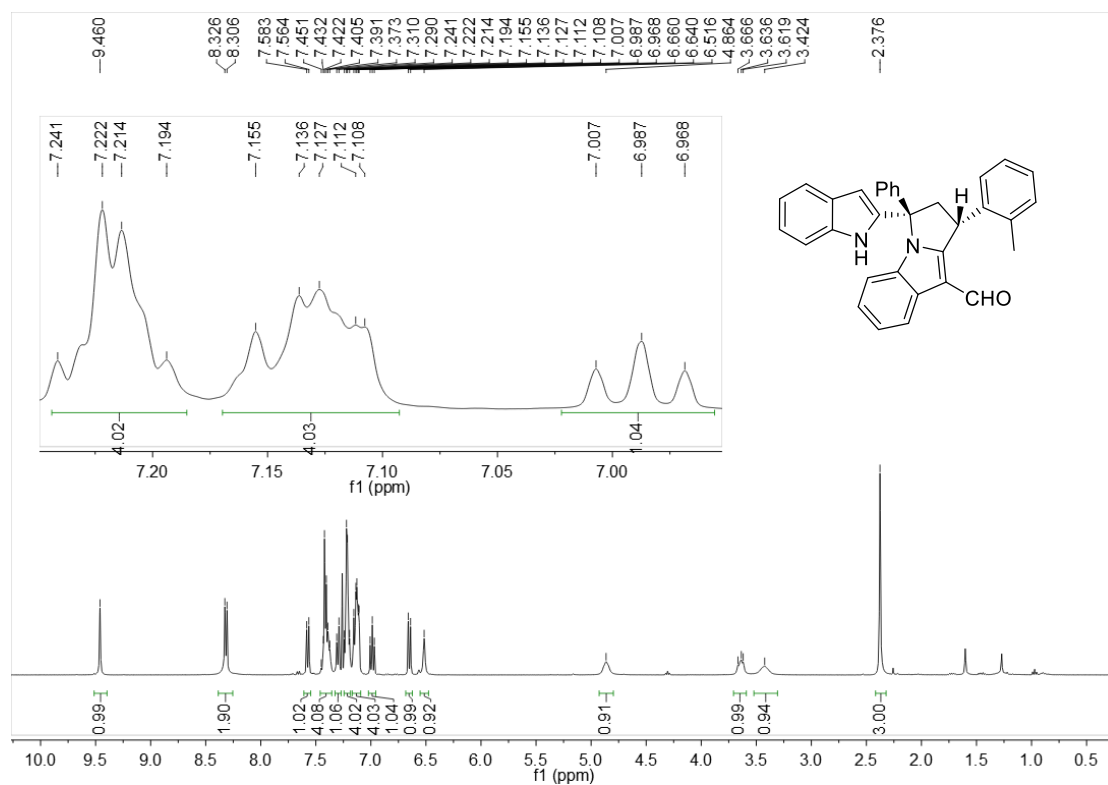

<sup>13</sup>C NMR (100 MHz, CDCl<sub>3</sub>) of compound **6**:

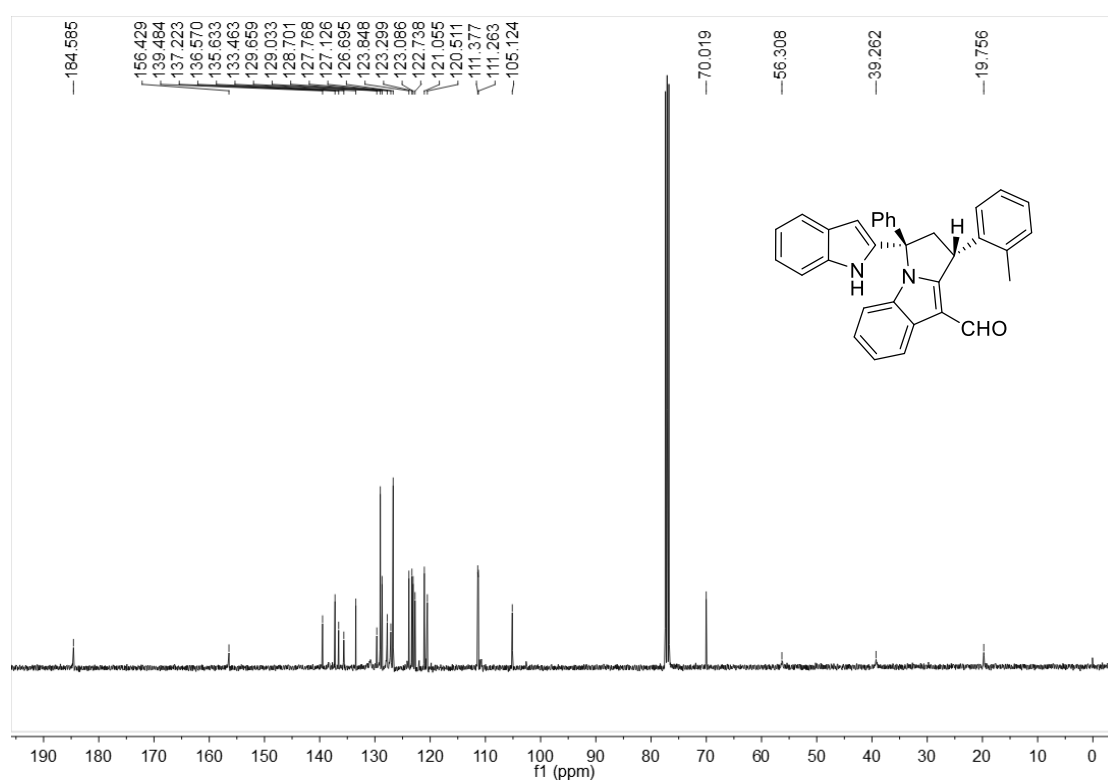

<sup>1</sup>H NMR (400 MHz, CDCl<sub>3</sub>) of compound 7:

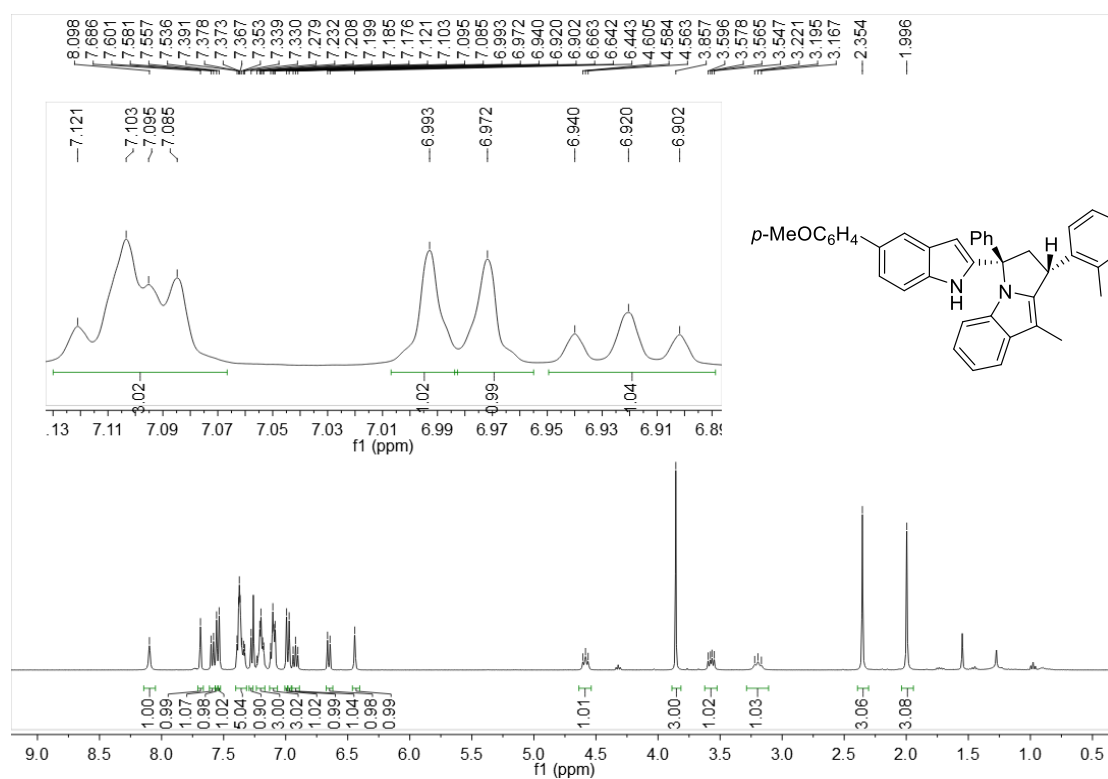

<sup>13</sup>C NMR (100 MHz, CDCl<sub>3</sub>) of compound 7:

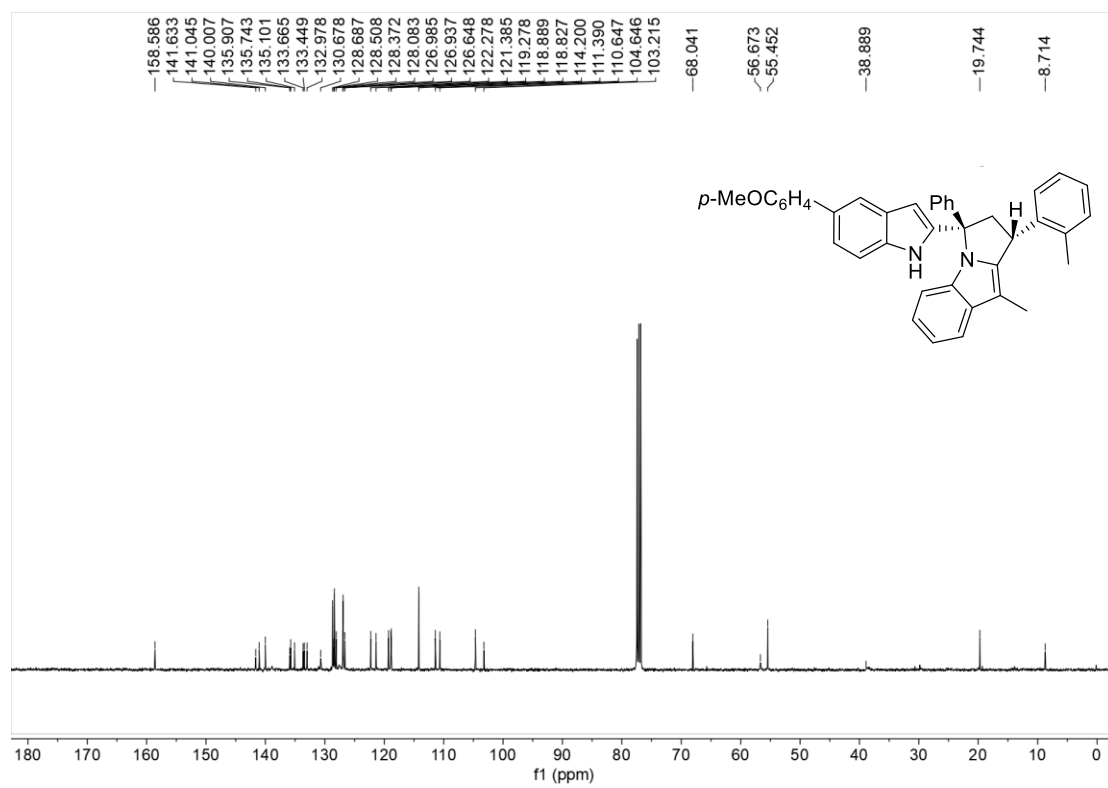

## 9. HPLC traces of products 3 and 6-7

3aa

Racemic:

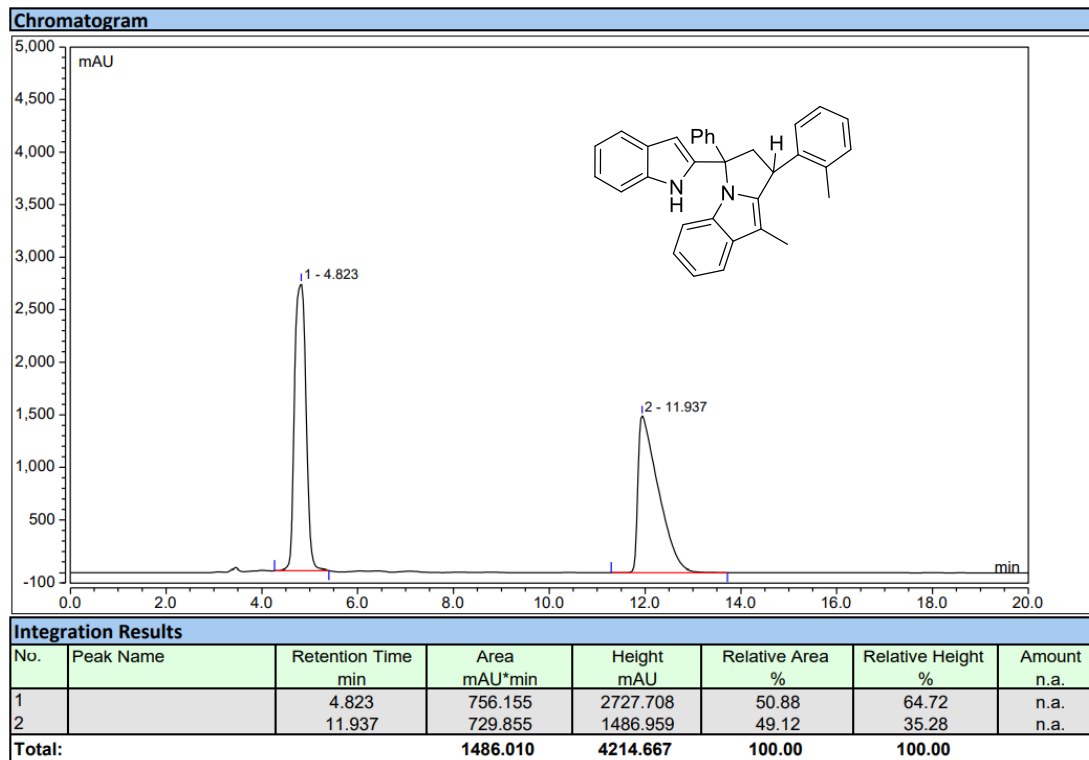

Enantioselective:

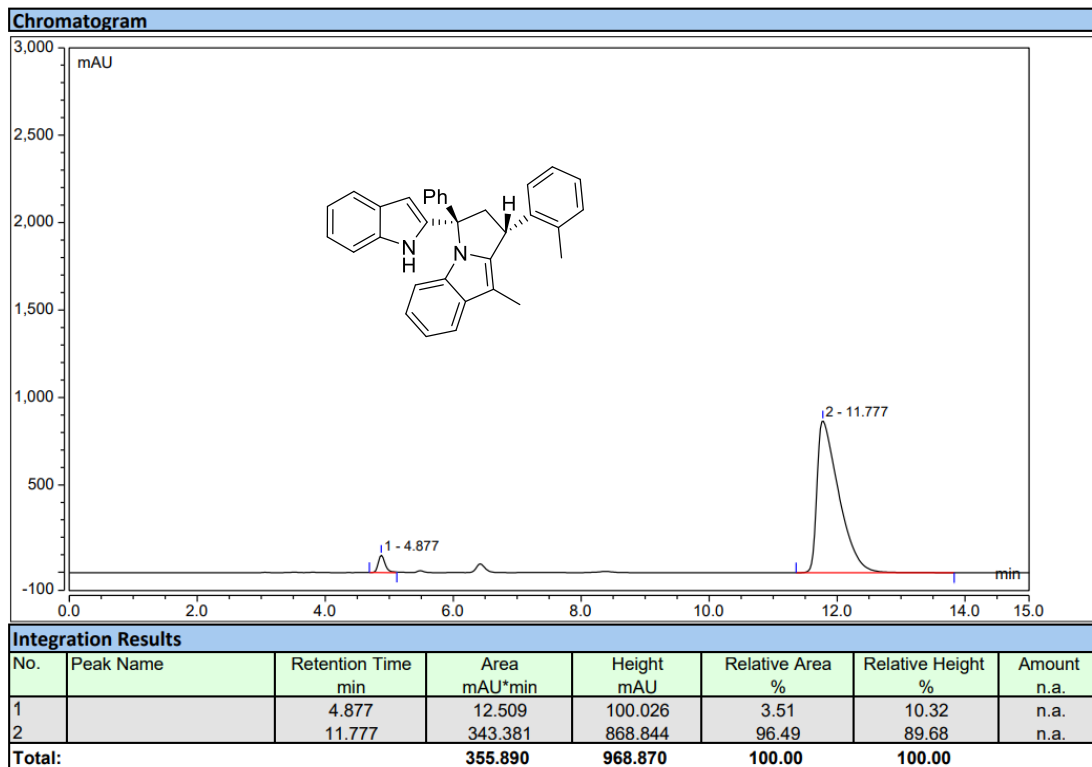

3ab

Racemic:

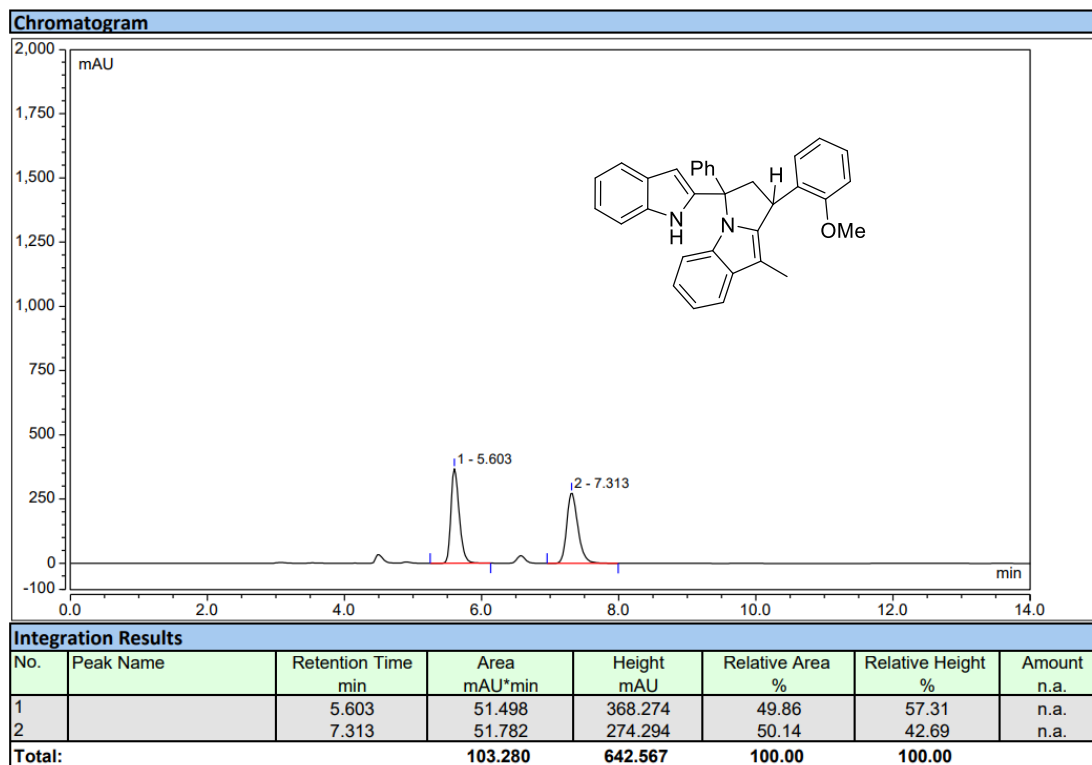

Enantioselective:

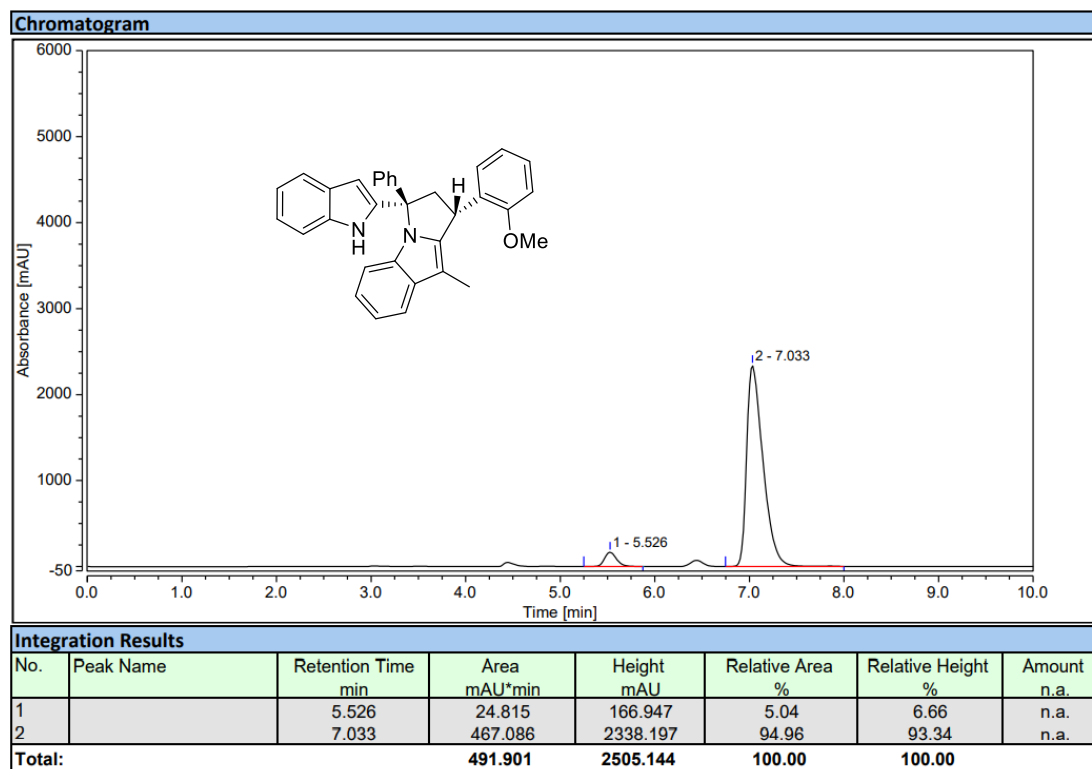



3ac

Racemic:

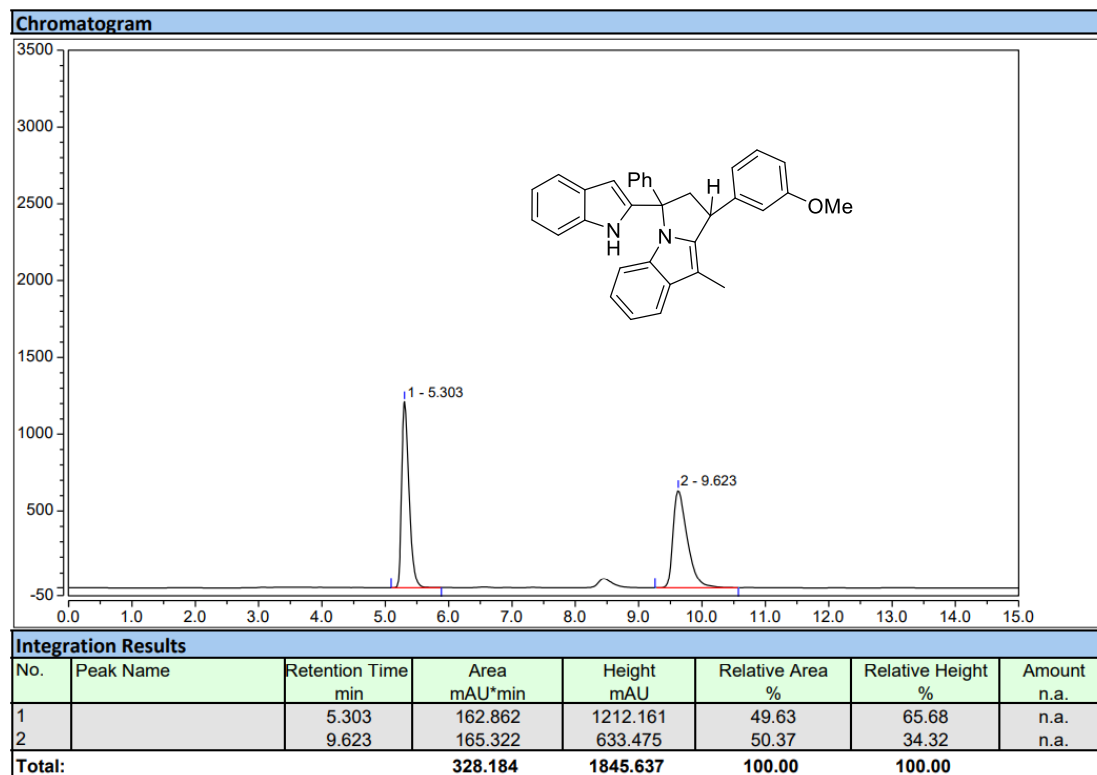

Enantioselective:

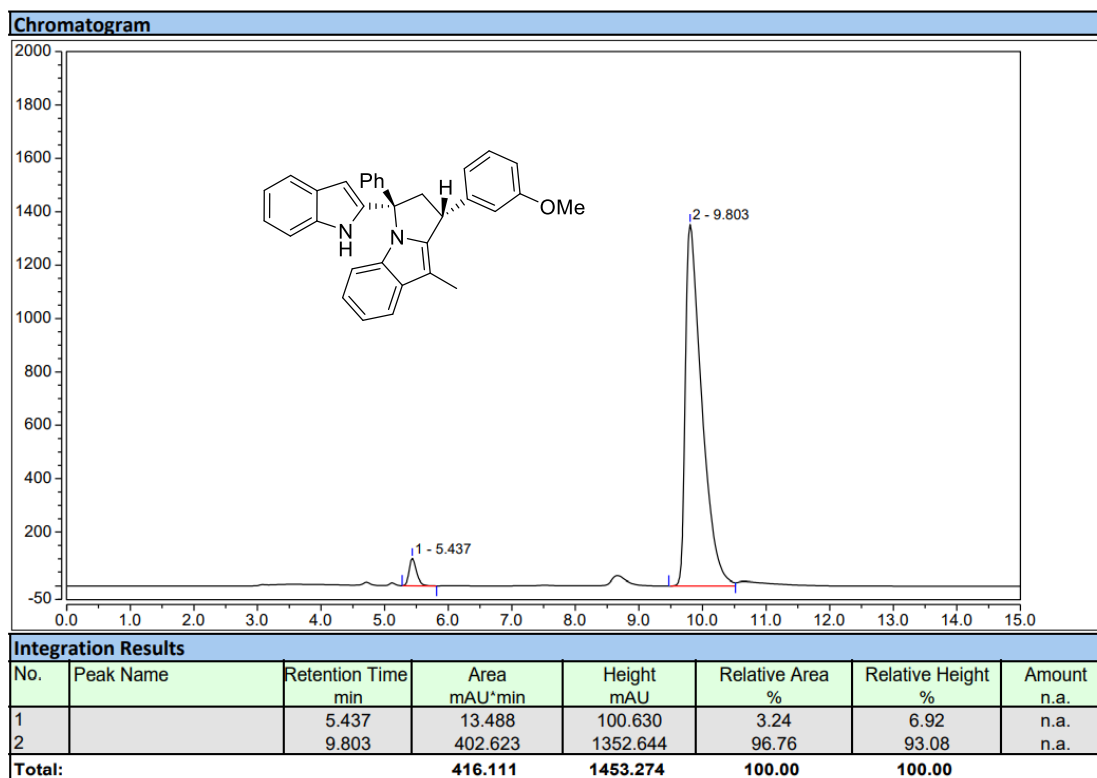

### 3ad

Racemic:

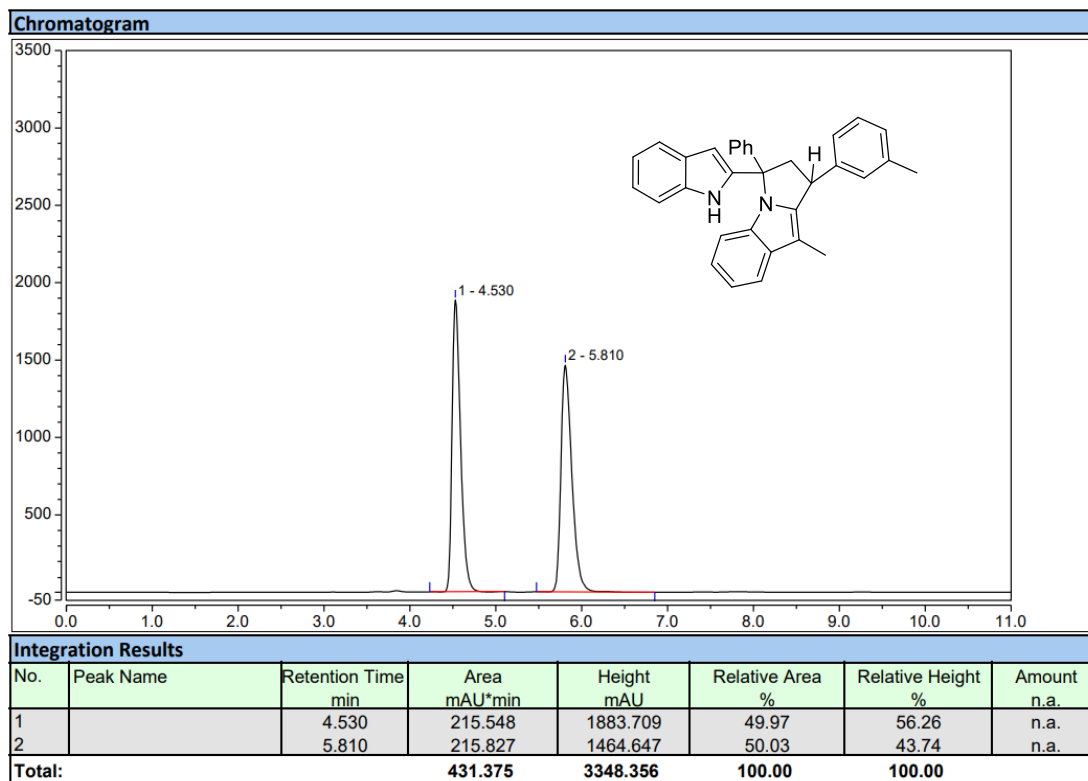

Enantioselective:

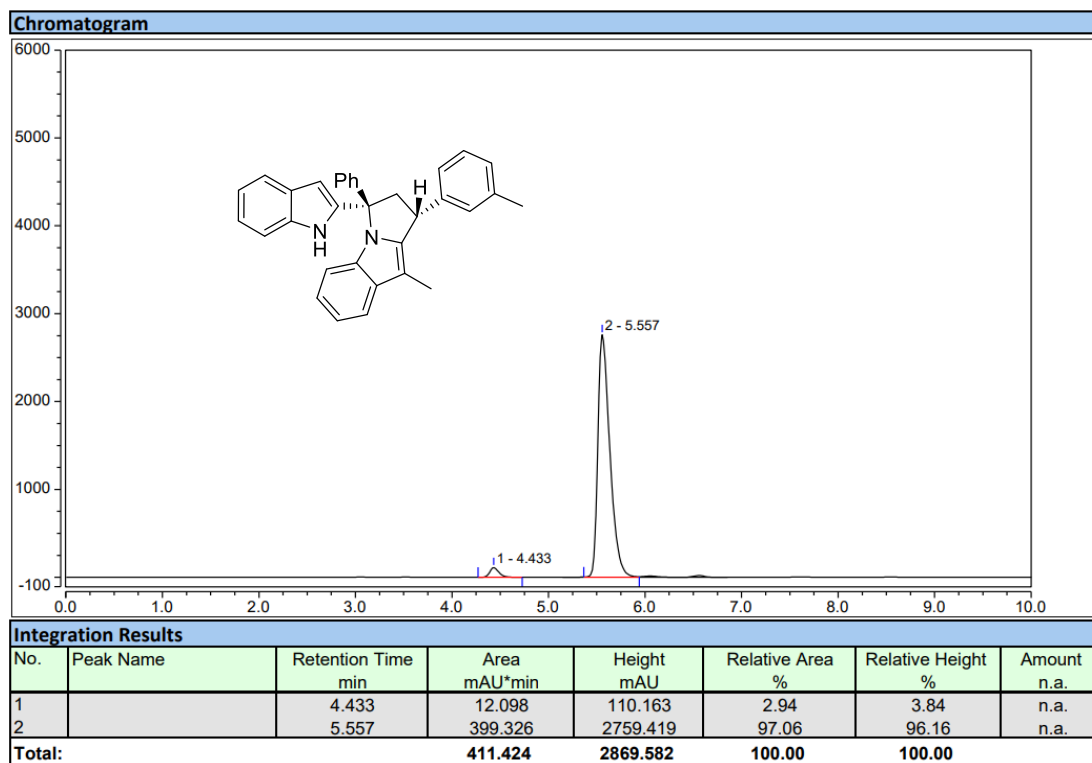

3ae

Racemic:

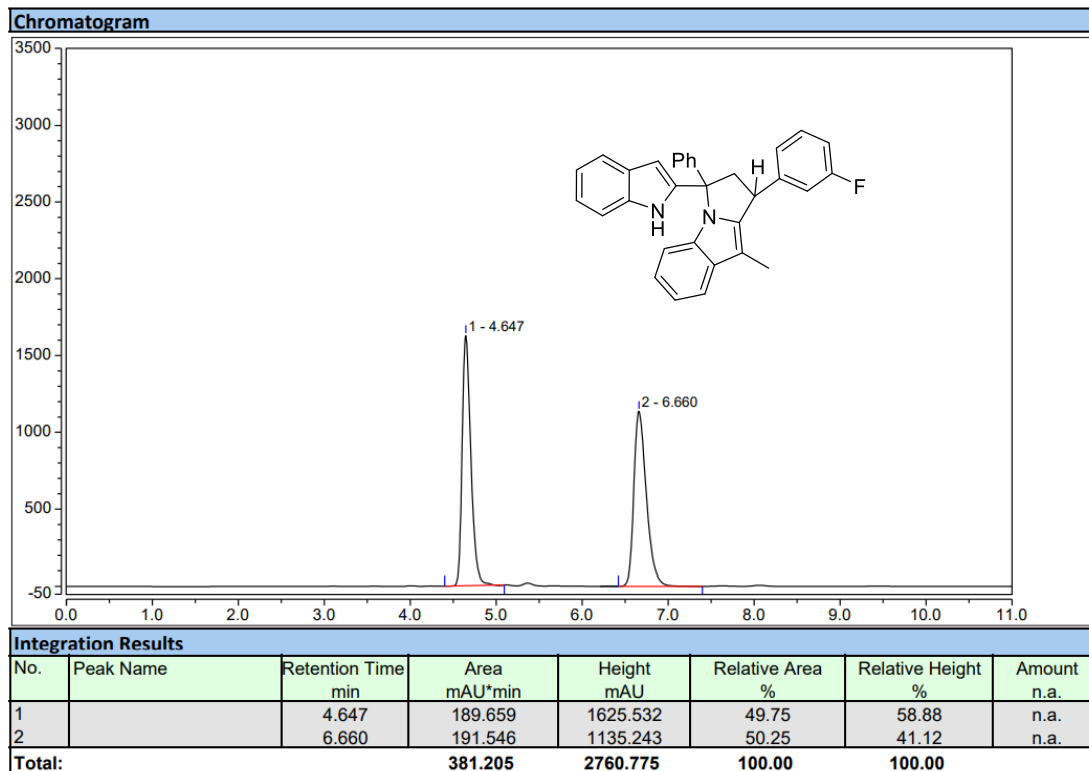

Enantioselective:

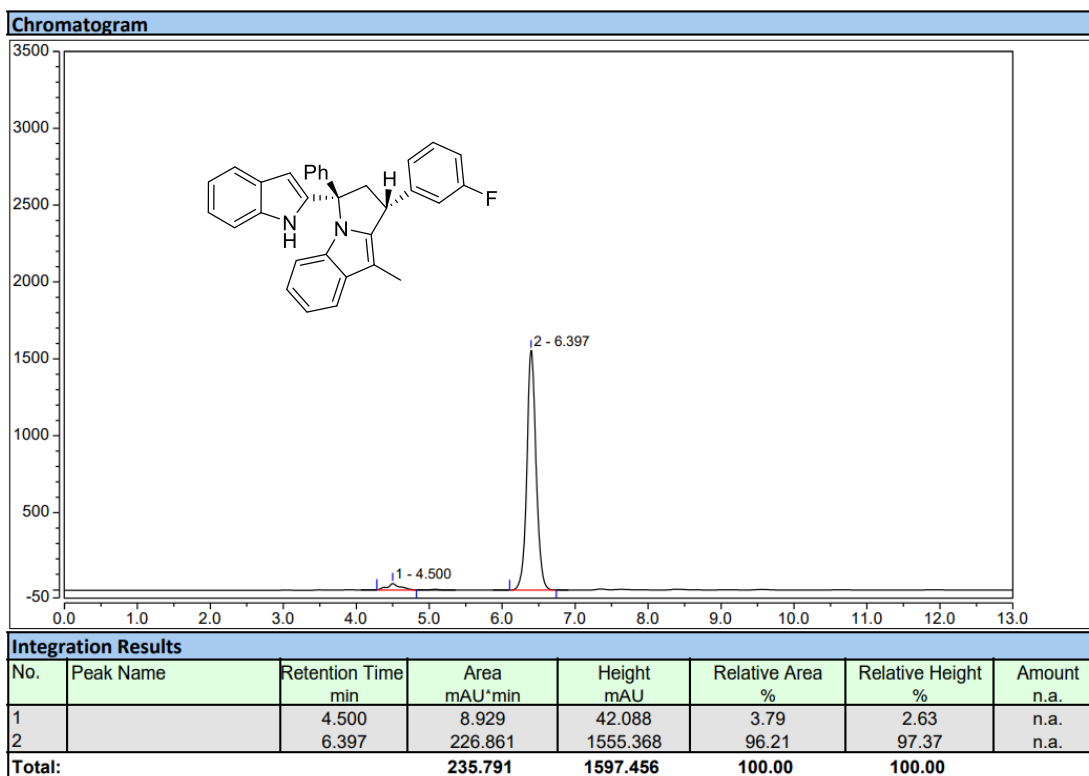

3af

Racemic:

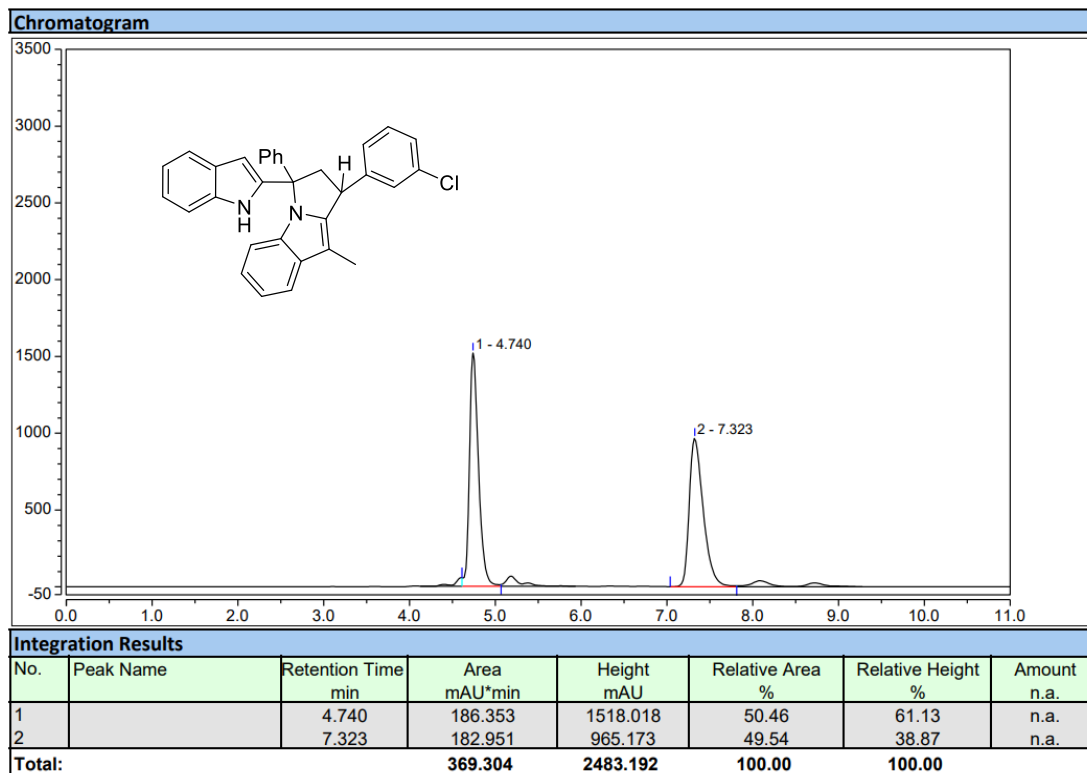

Enantioselective:

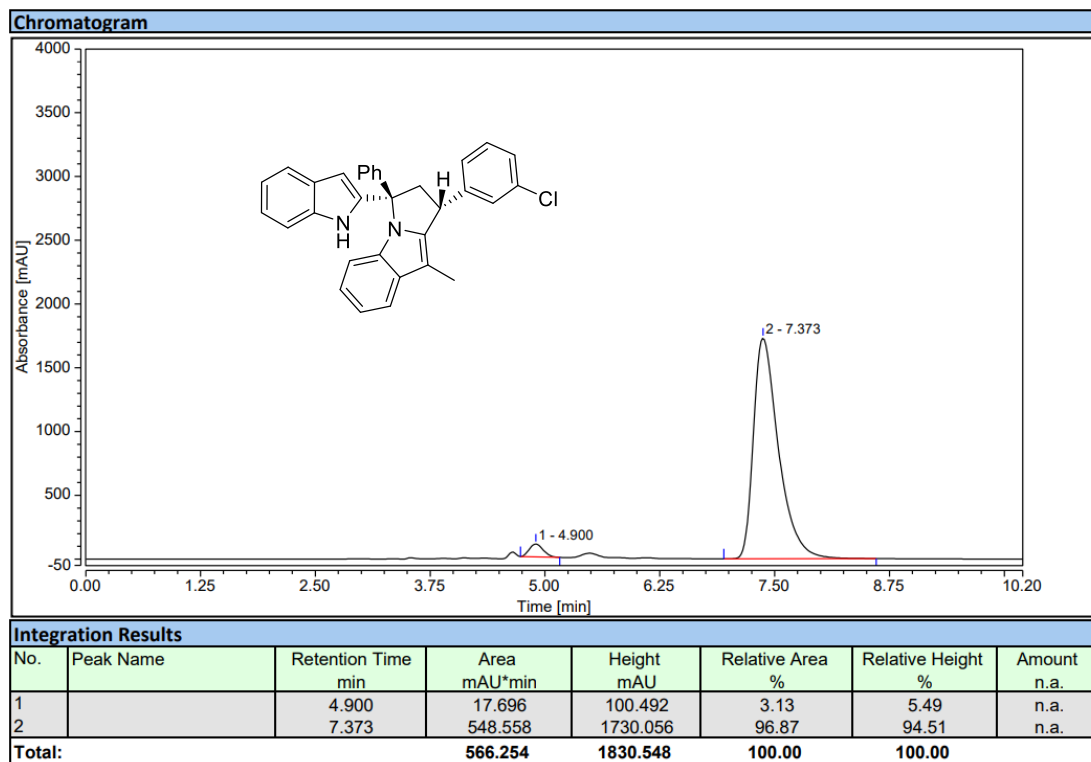

3ag

Racemic:

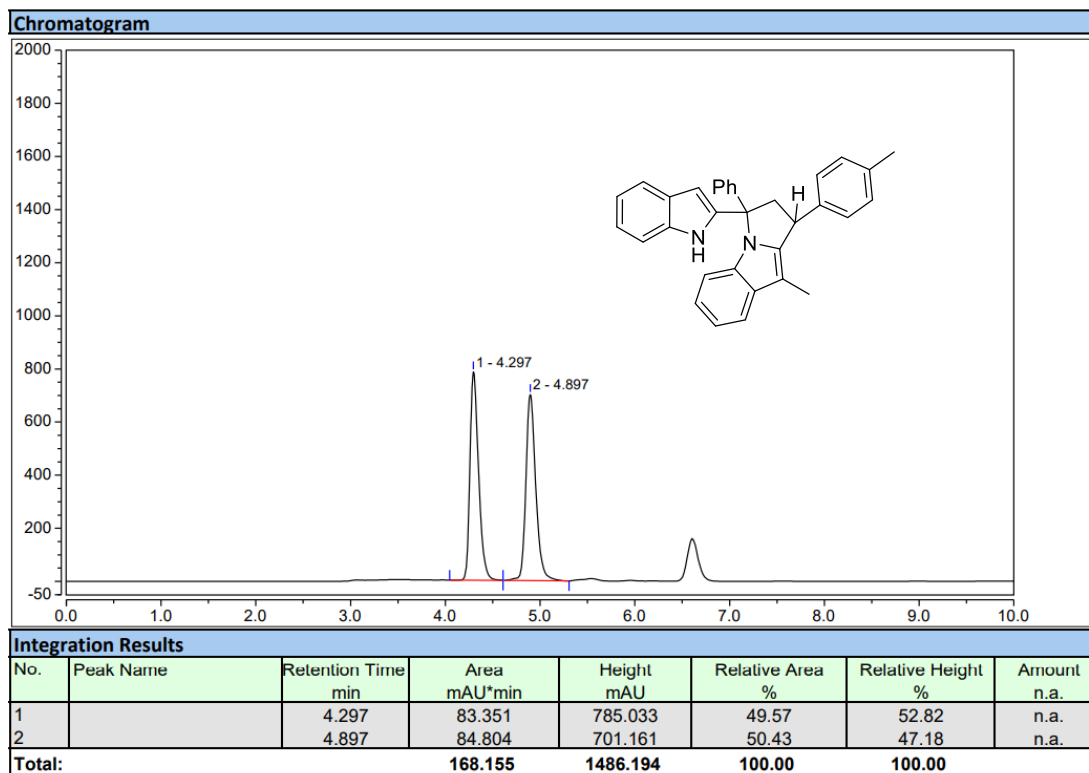

Enantioselective:

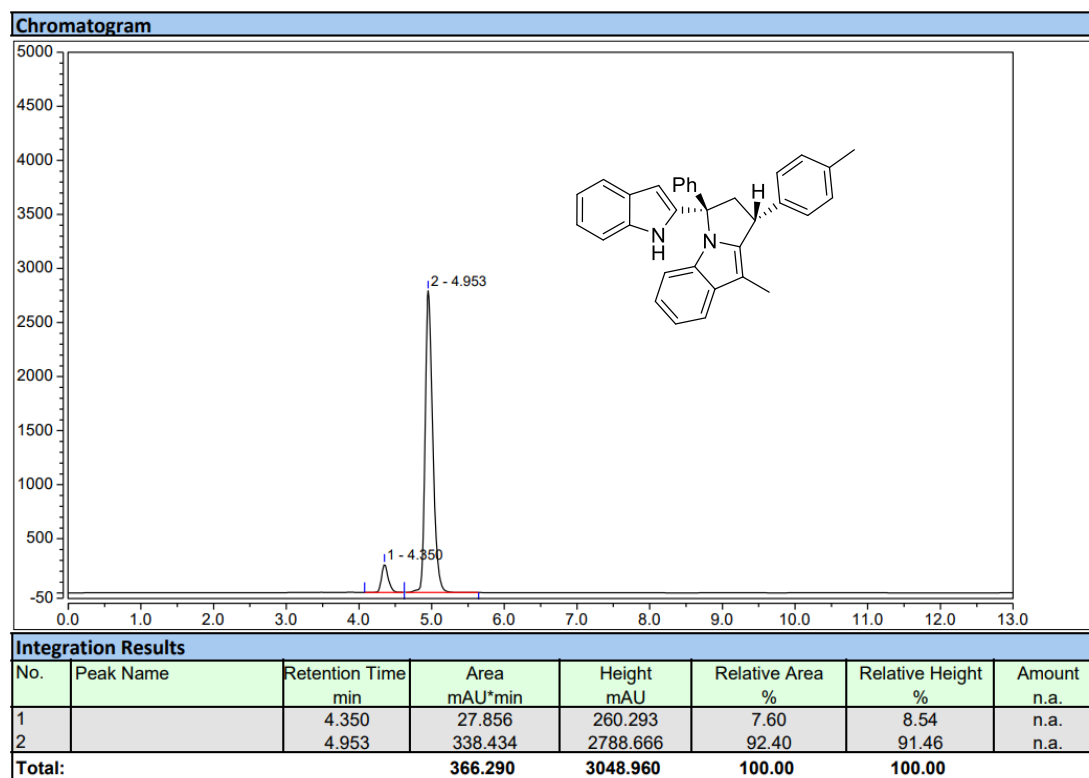

3ah

Racemic:

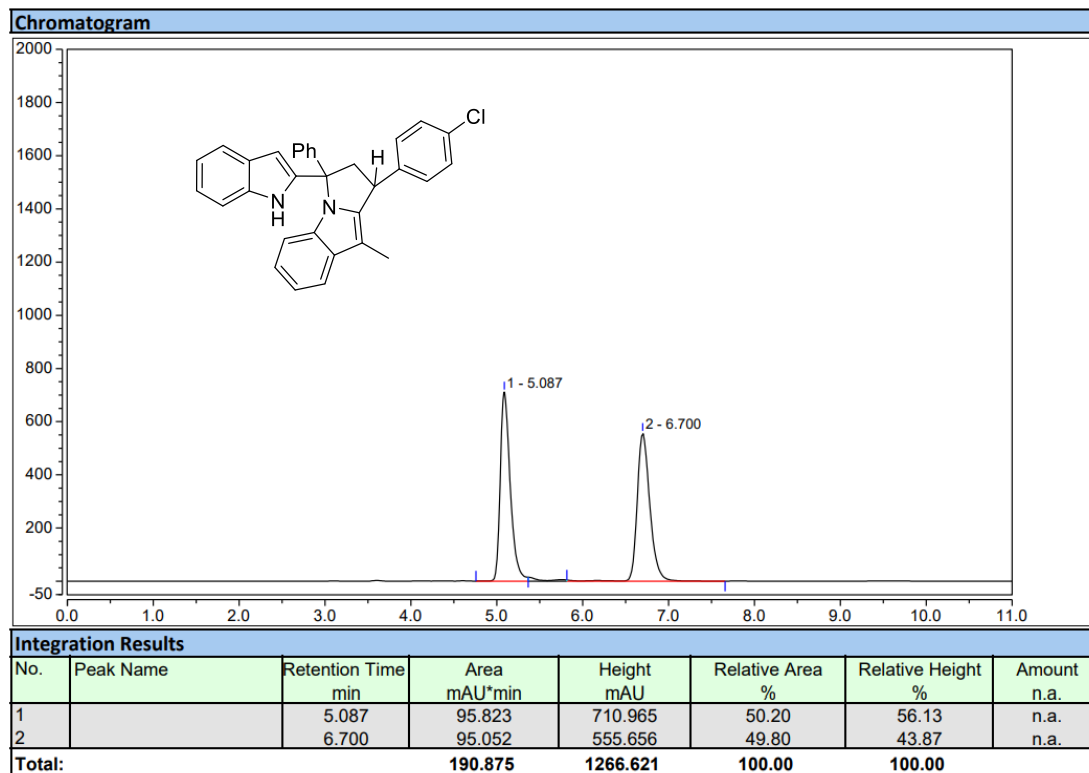

Enantioselective:

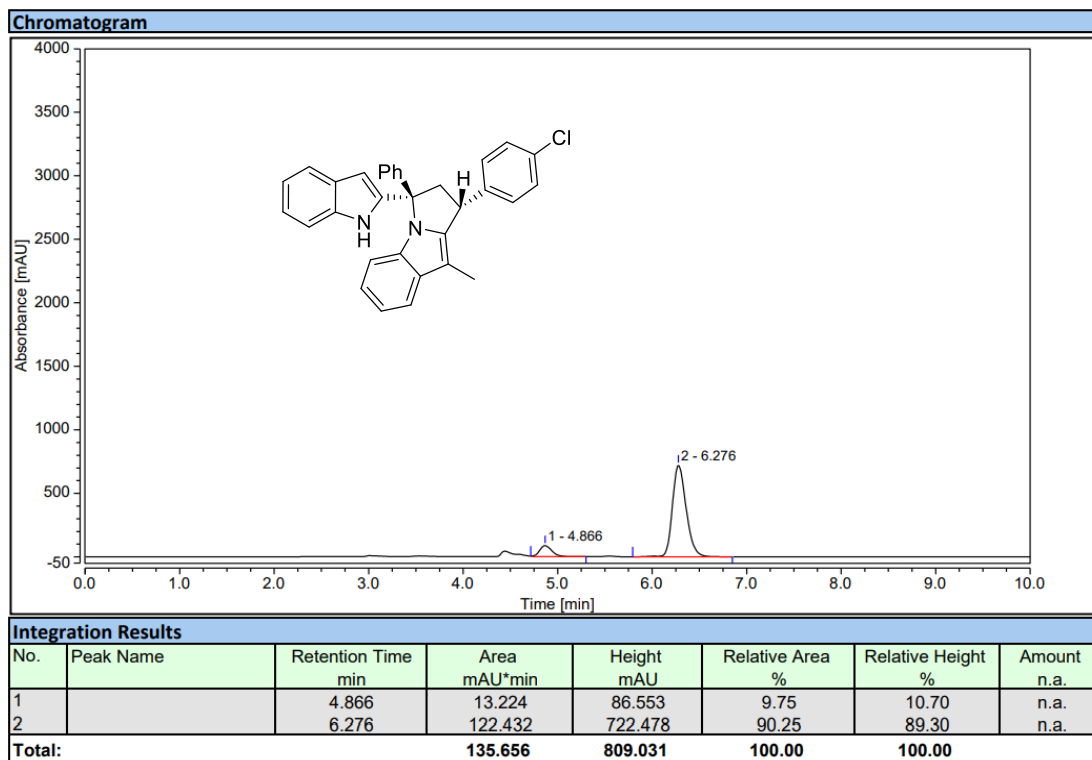

3ai

Racemic:

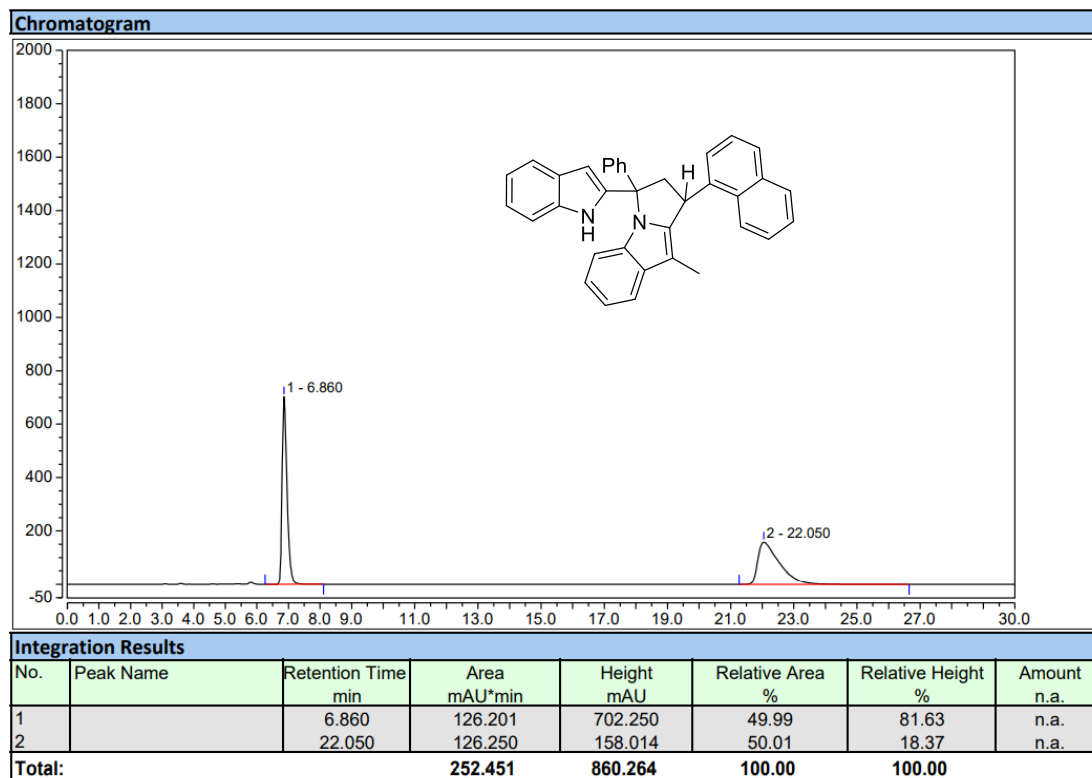

Enantioselective:

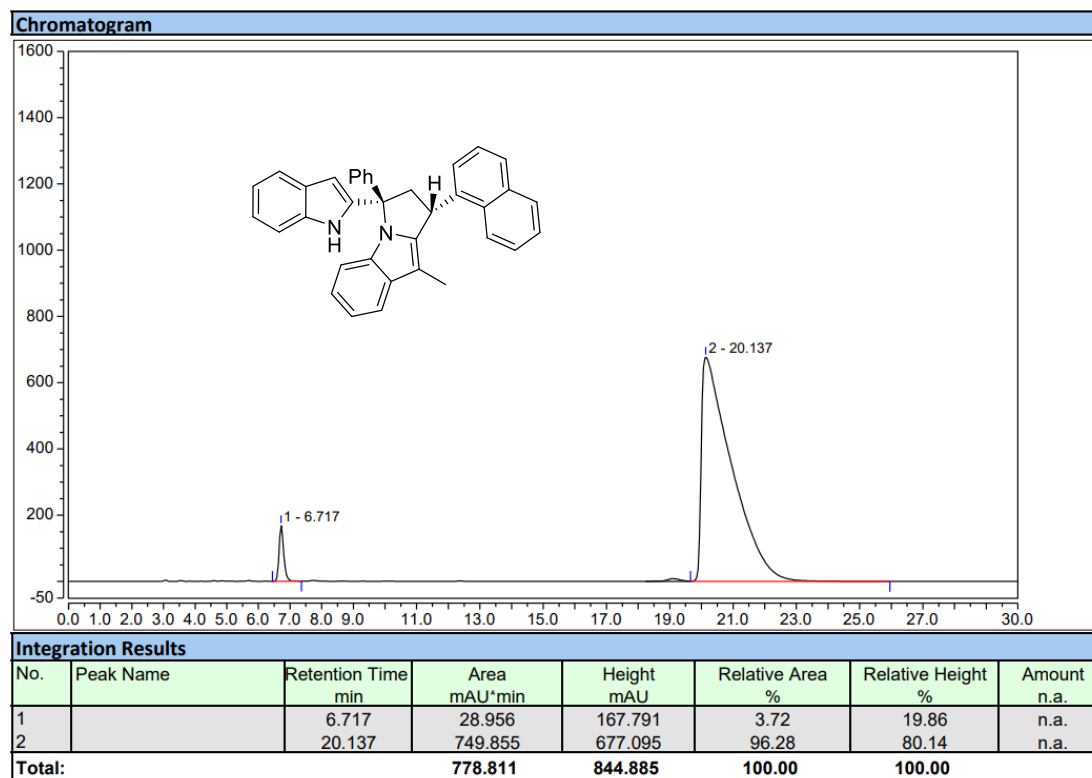

3aj

Racemic:

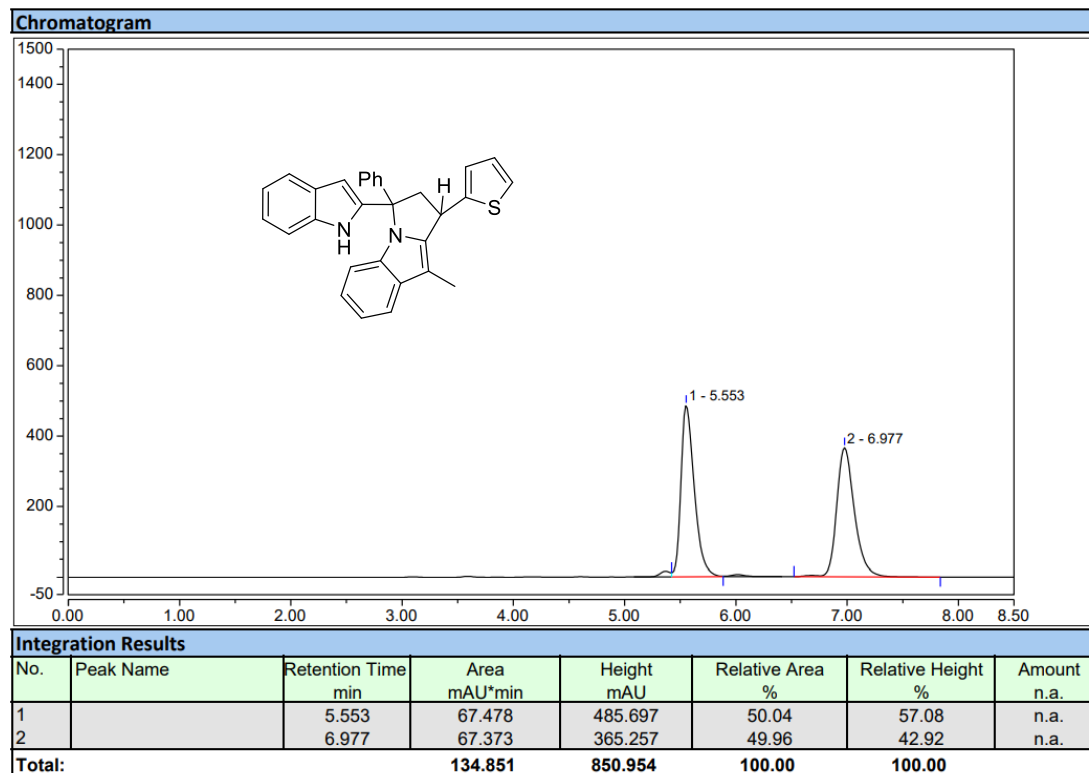

Enantioselective:

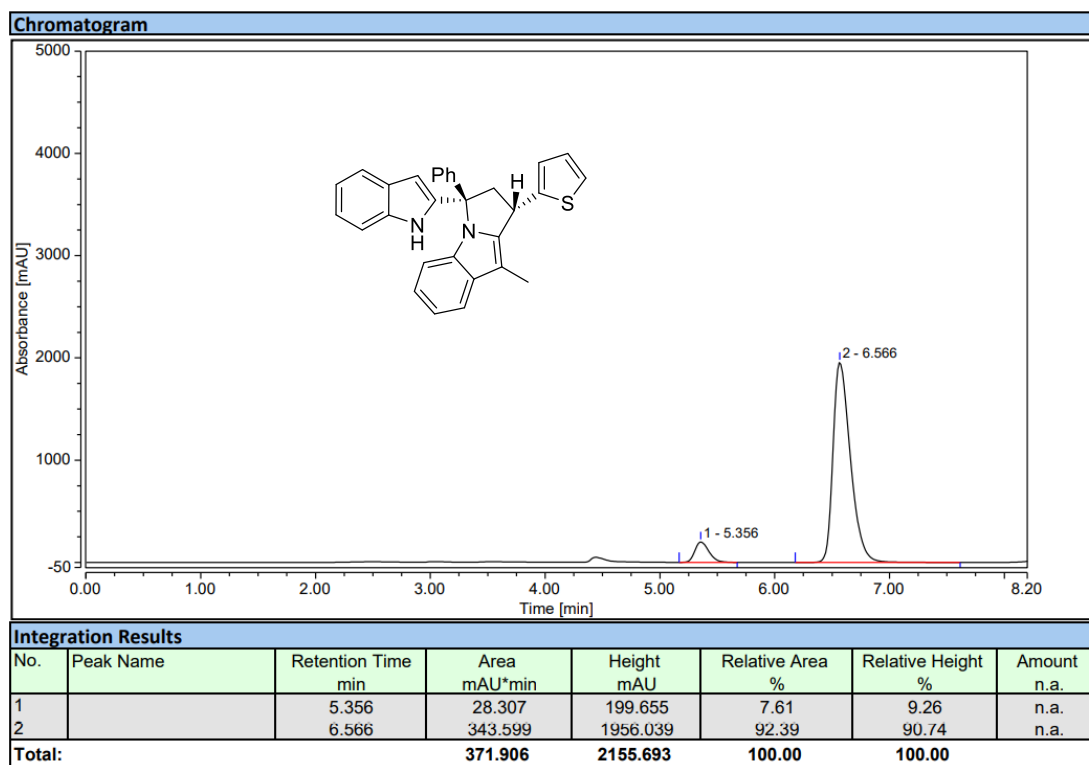



3ak

Racemic:

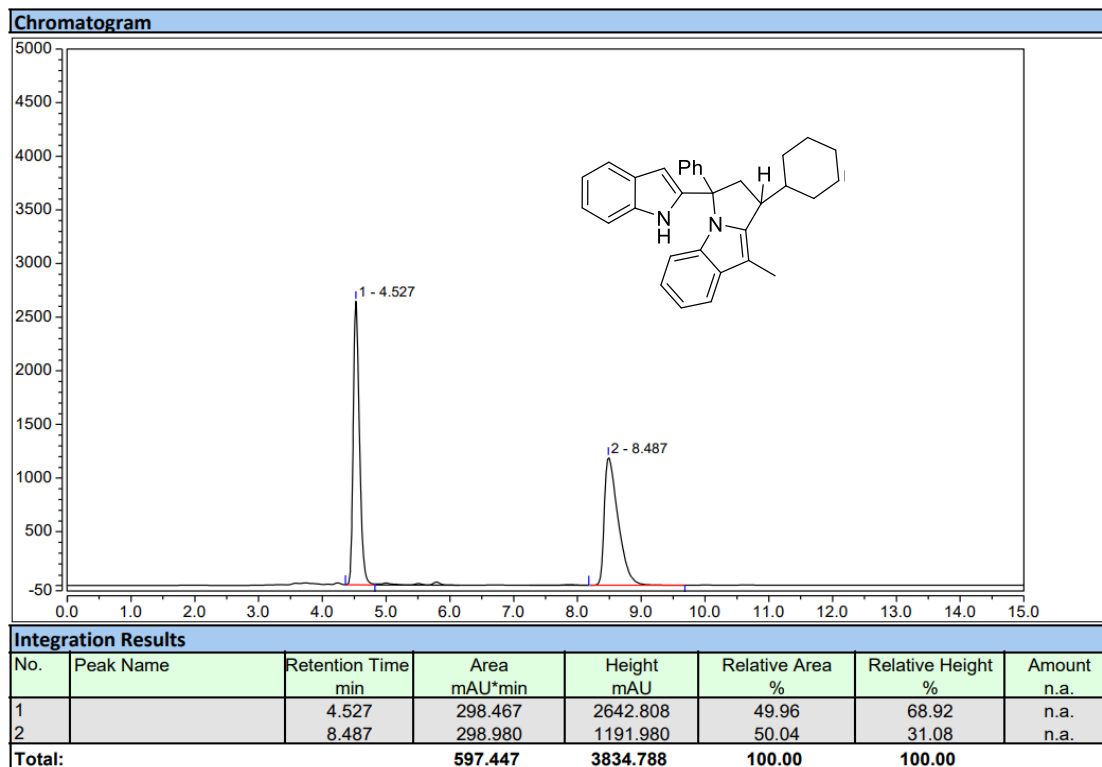

Enantioselective:

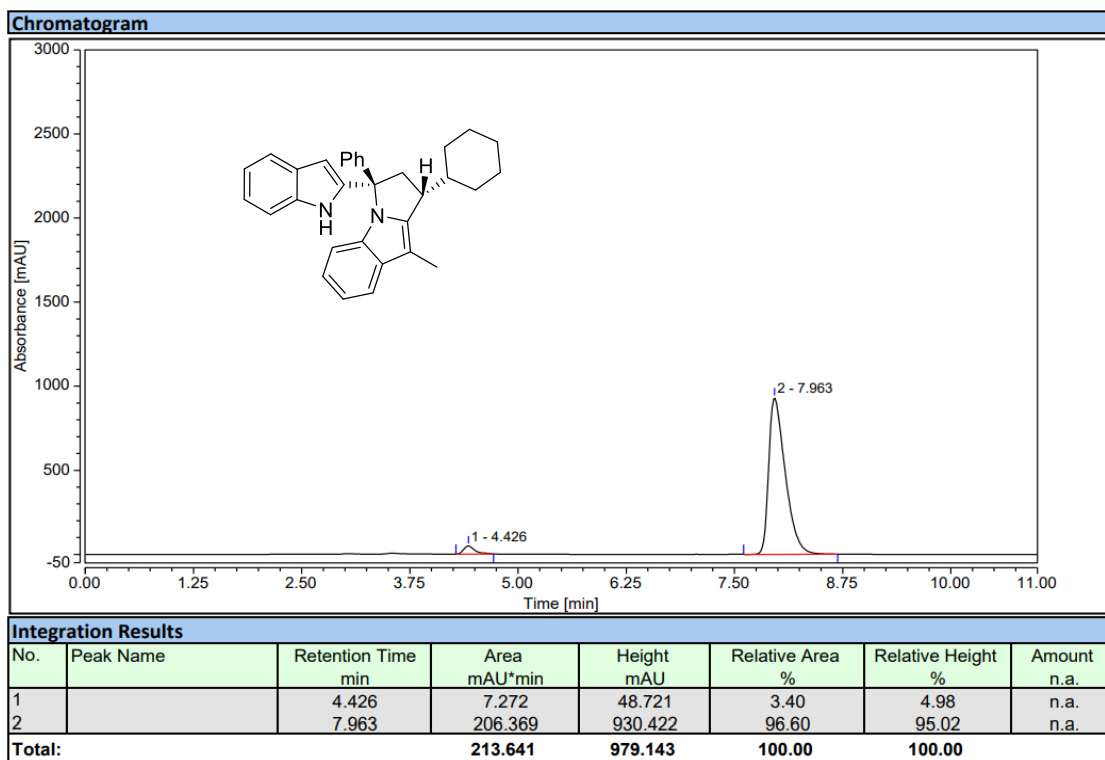

3al

Racemic:

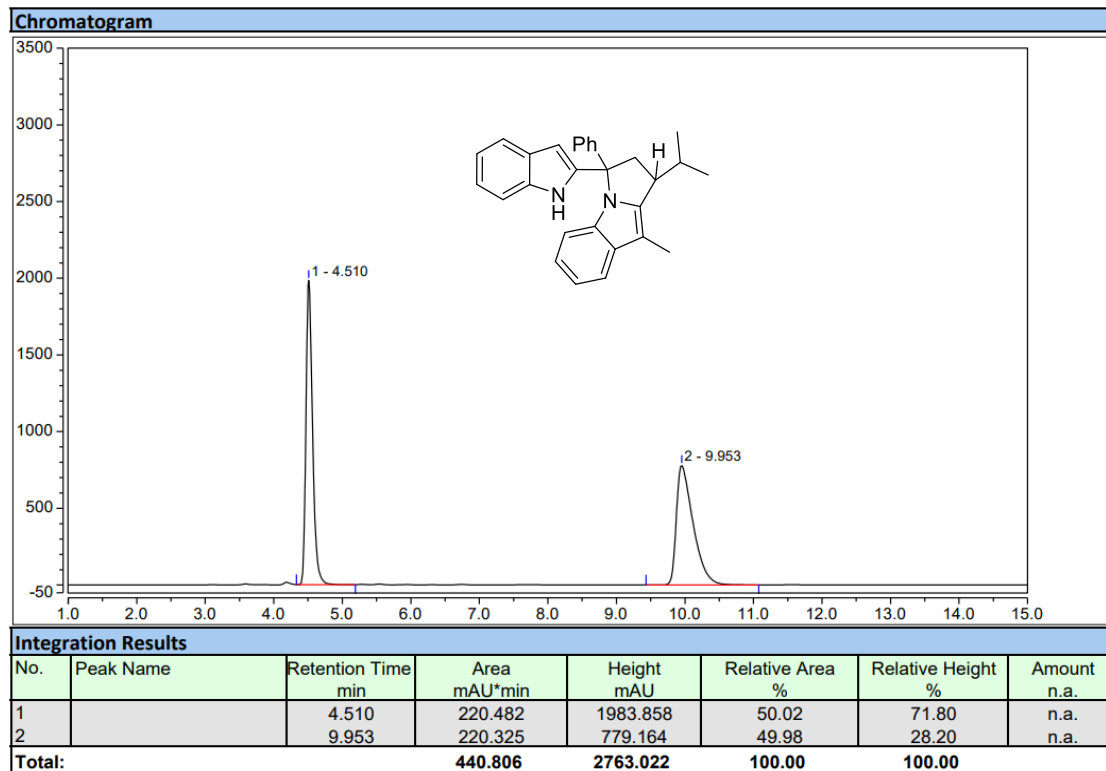

Enantioselective:

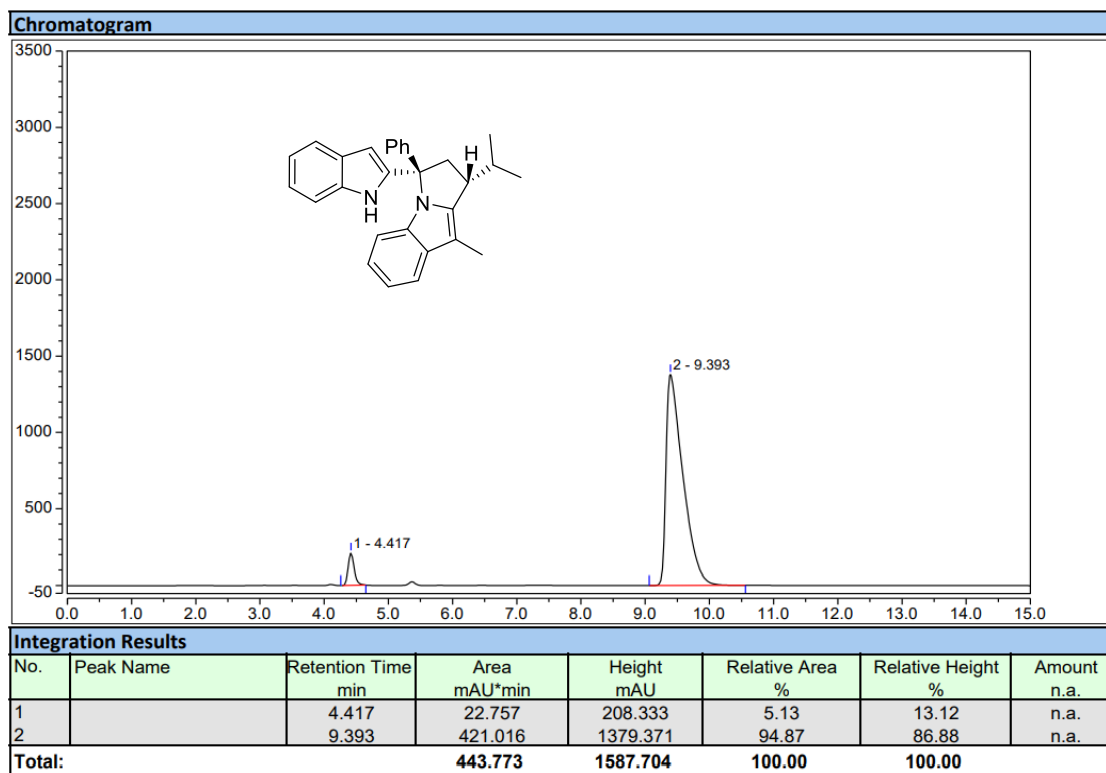

3am

Racemic:

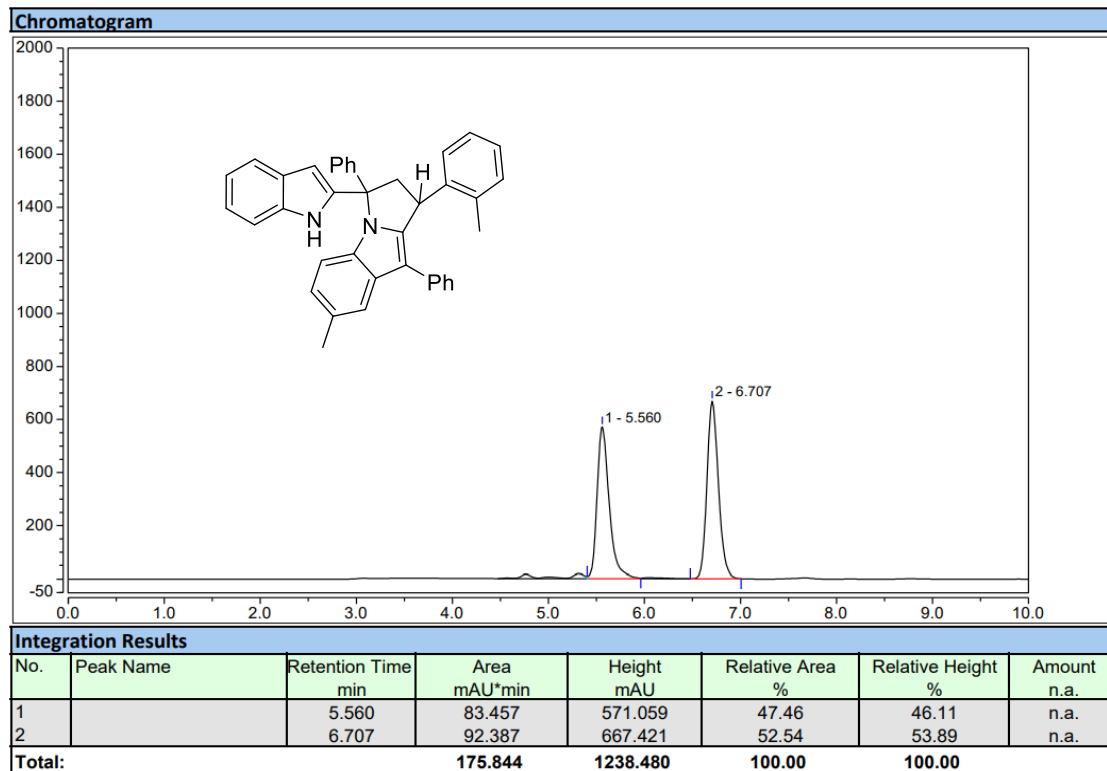

Enantioselective:

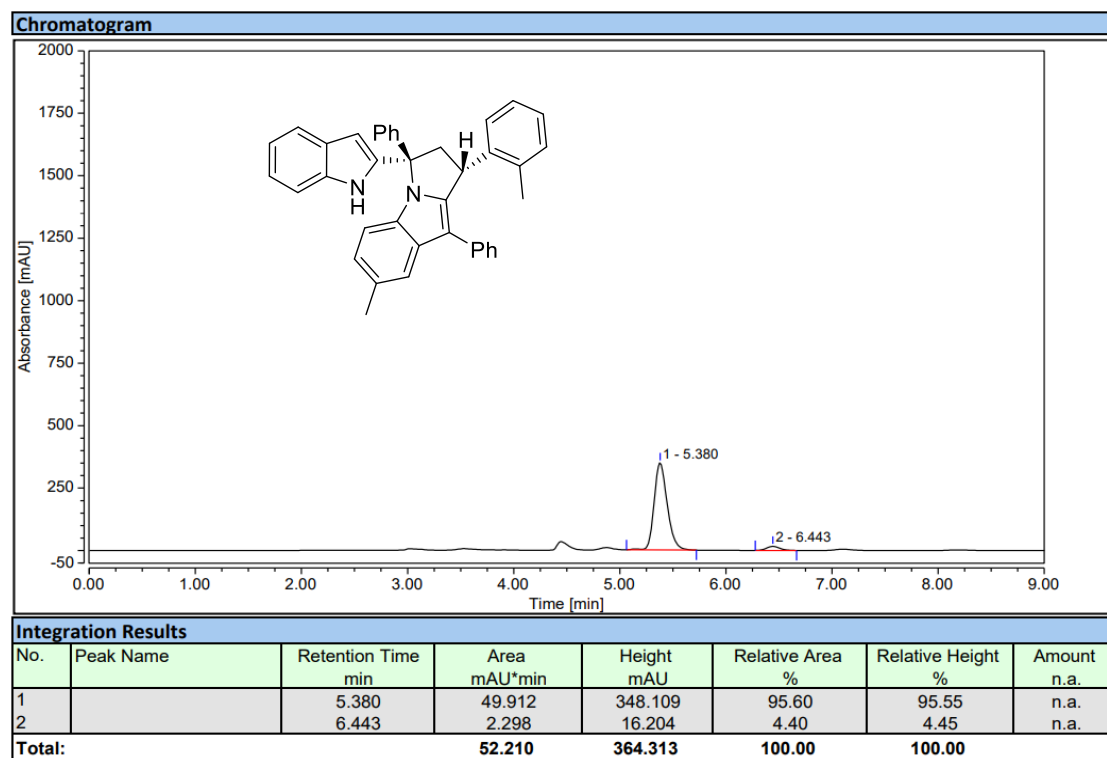

3an

Racemic:

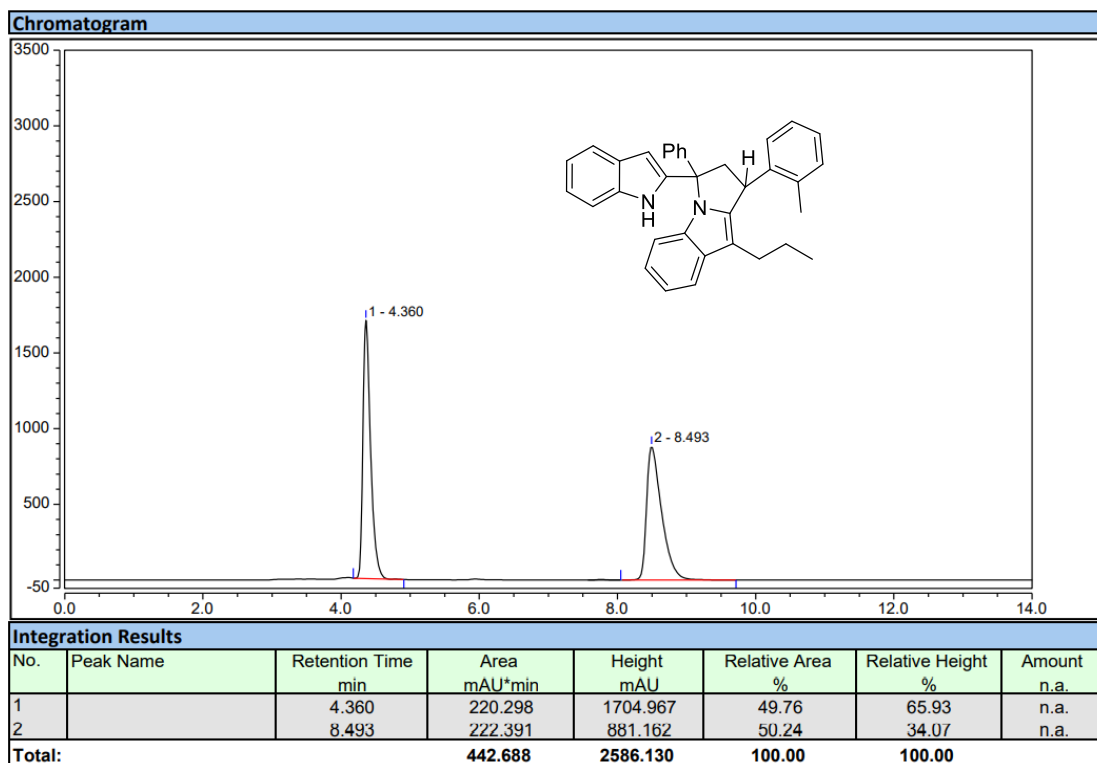

Enantioselective:

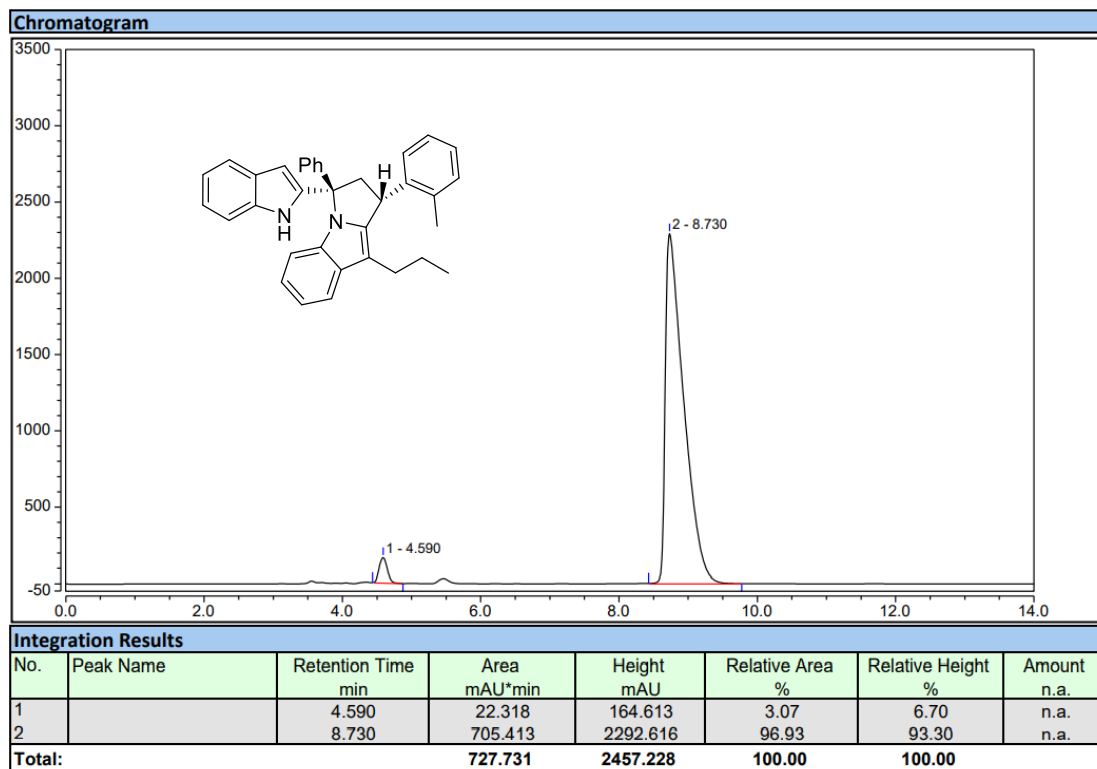

3ao

Racemic:

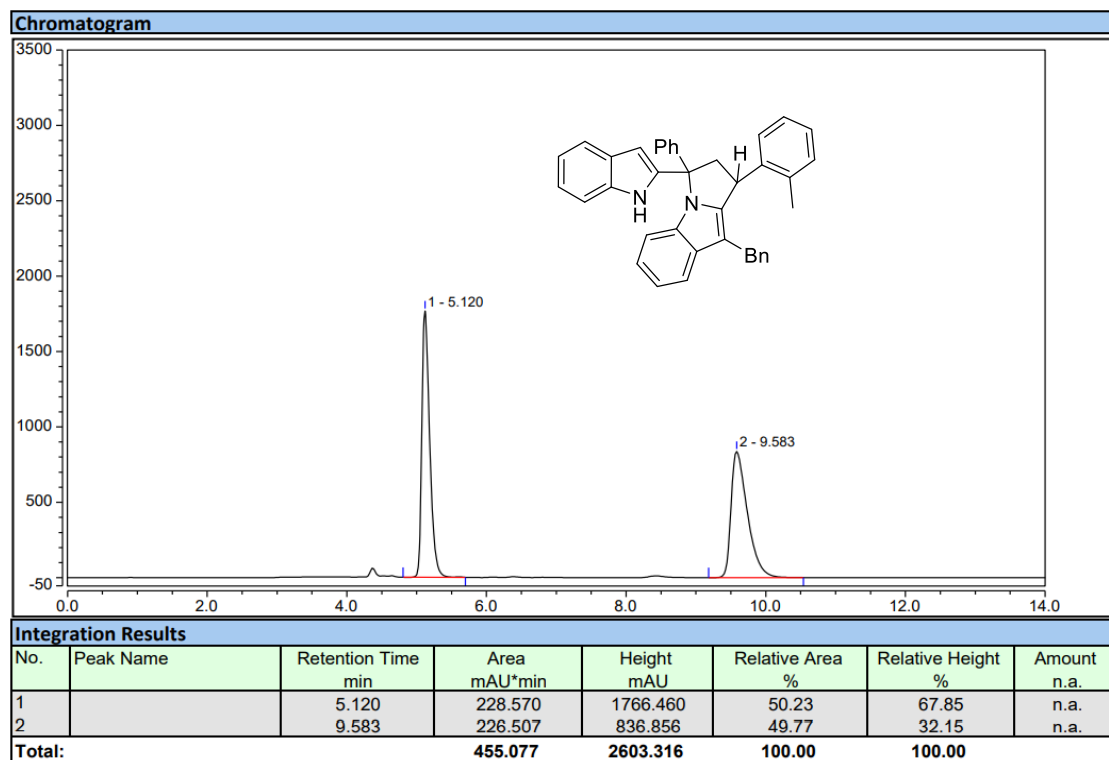

Enantioselective:

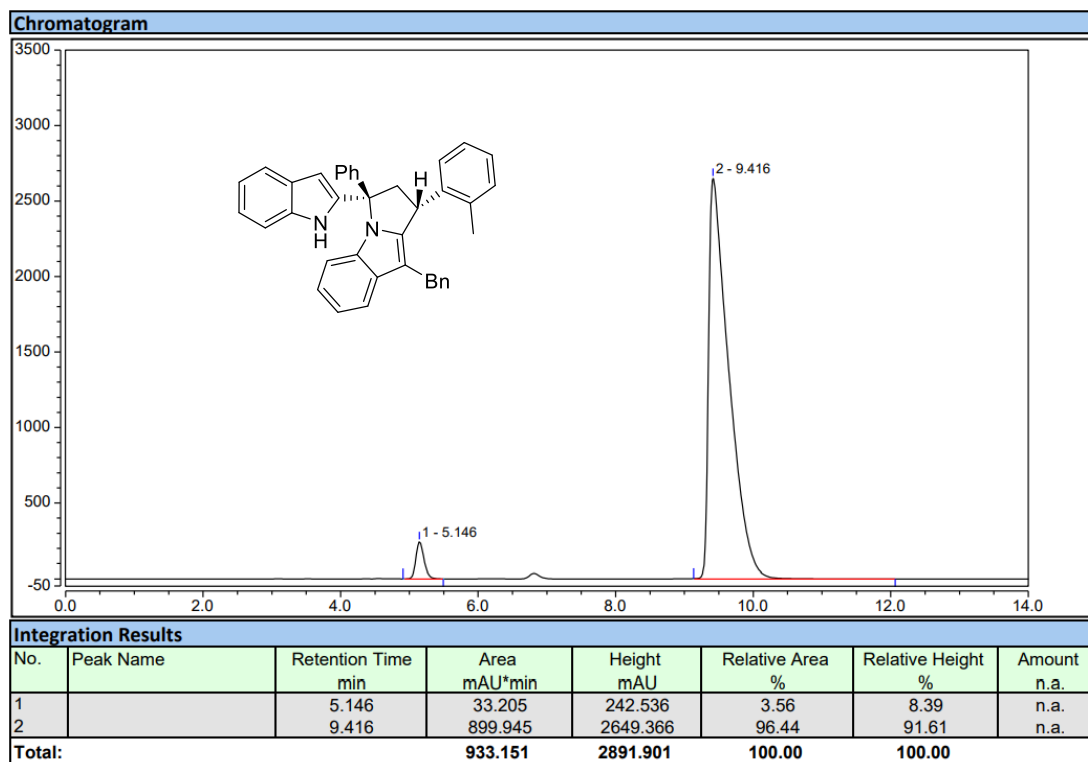

### 3ba

Racemic:

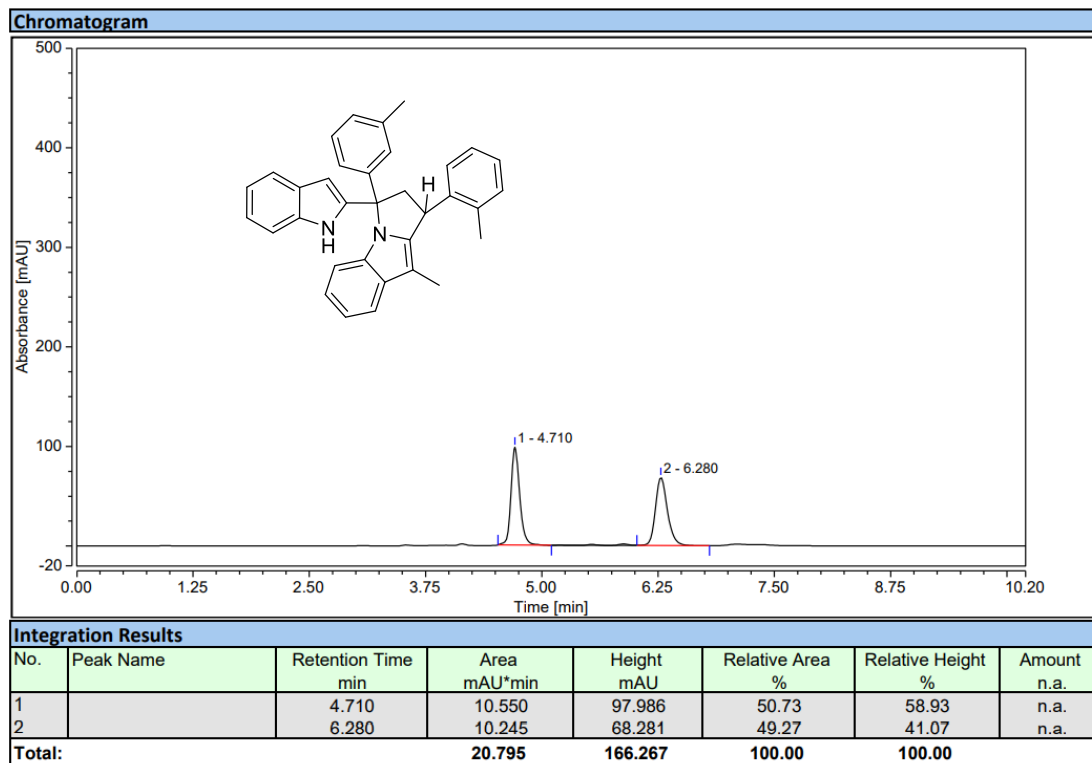

Enantioselective:

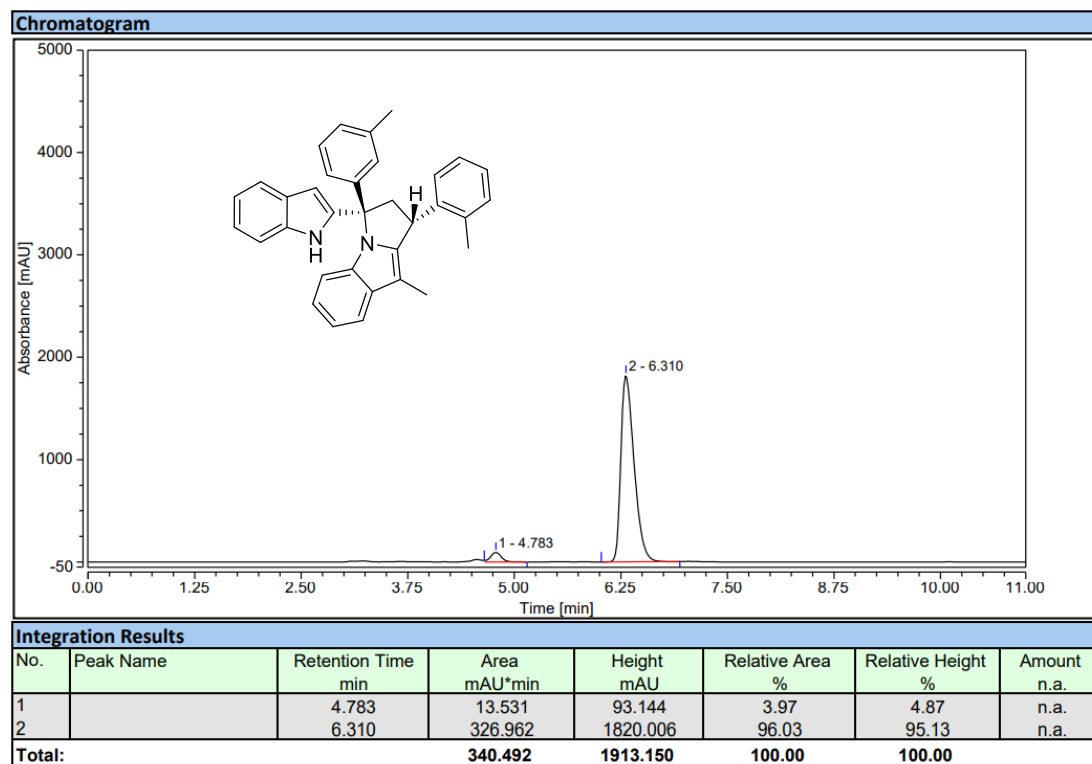

3ca

Racemic:

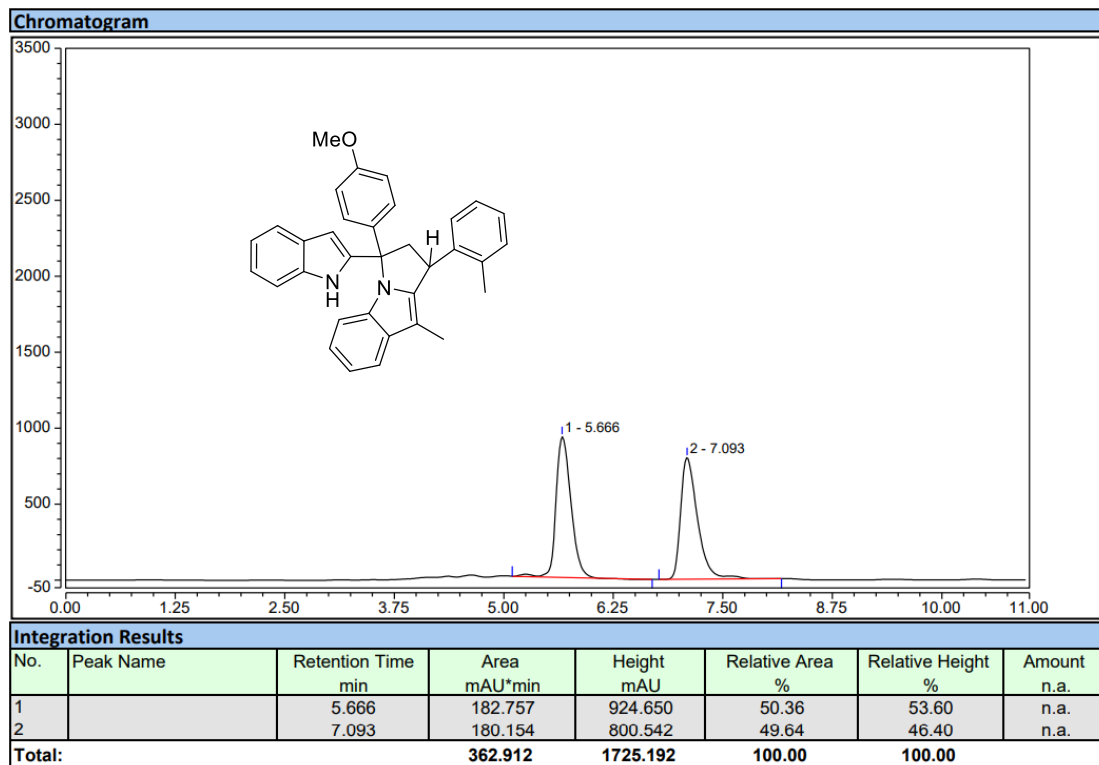

Enantioselective:

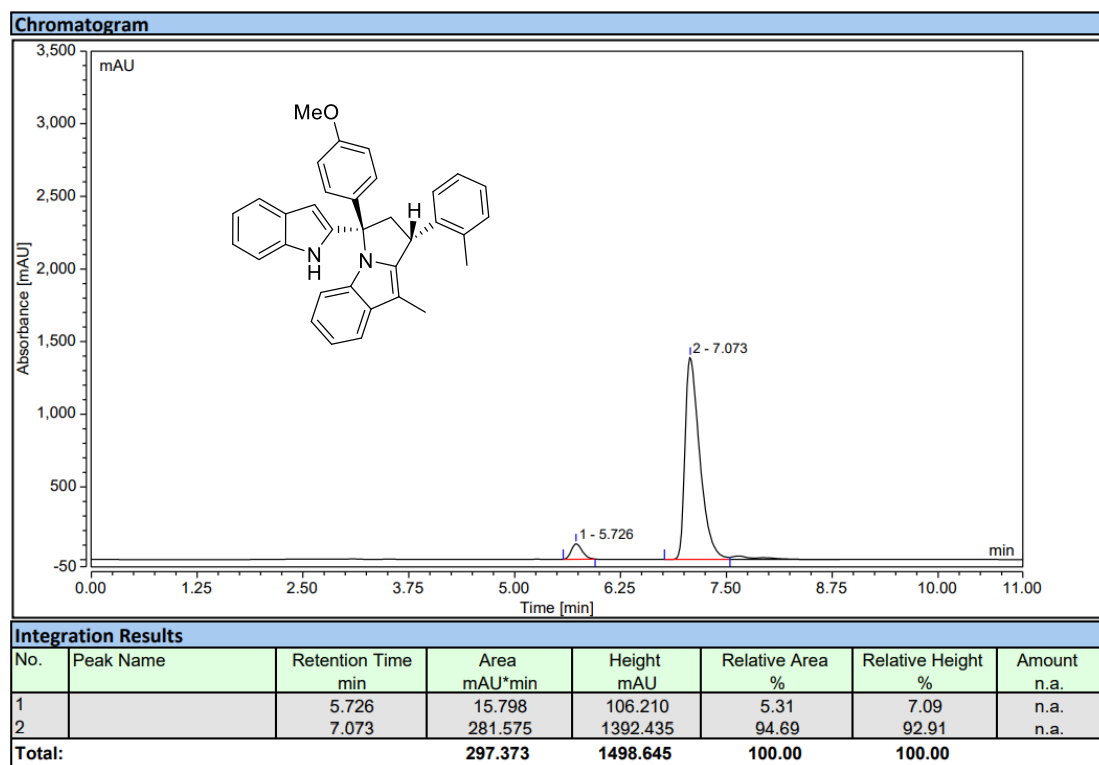

### 3da

Racemic:

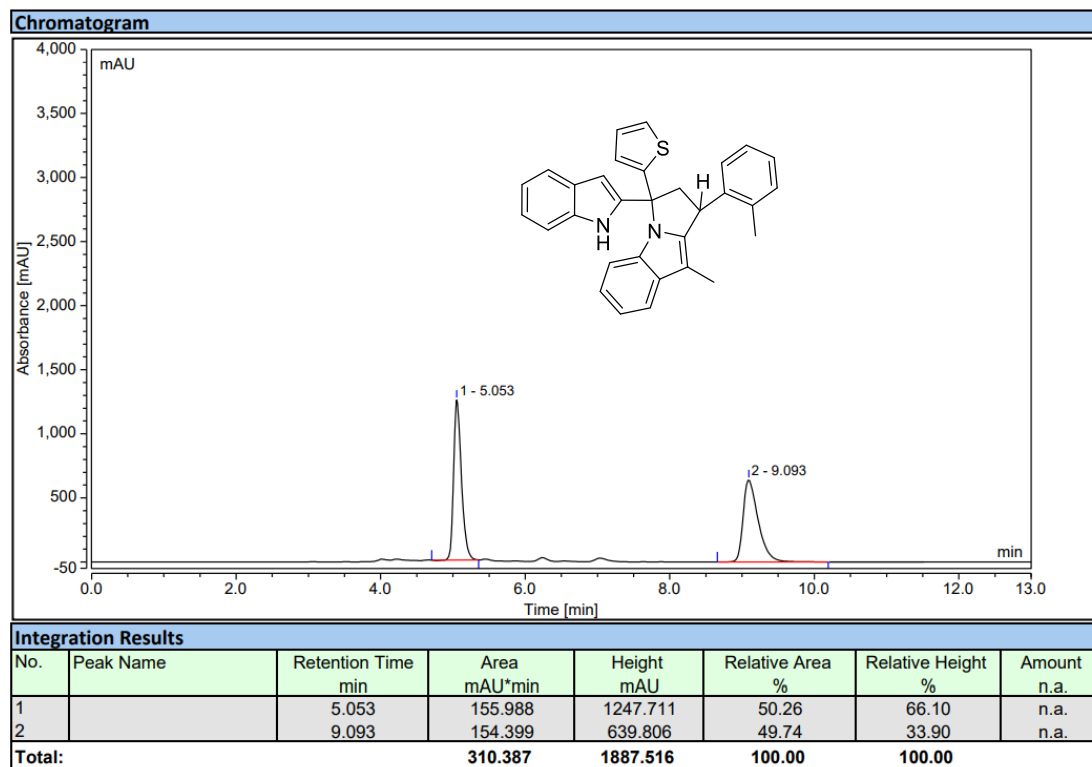

Enantioselective:

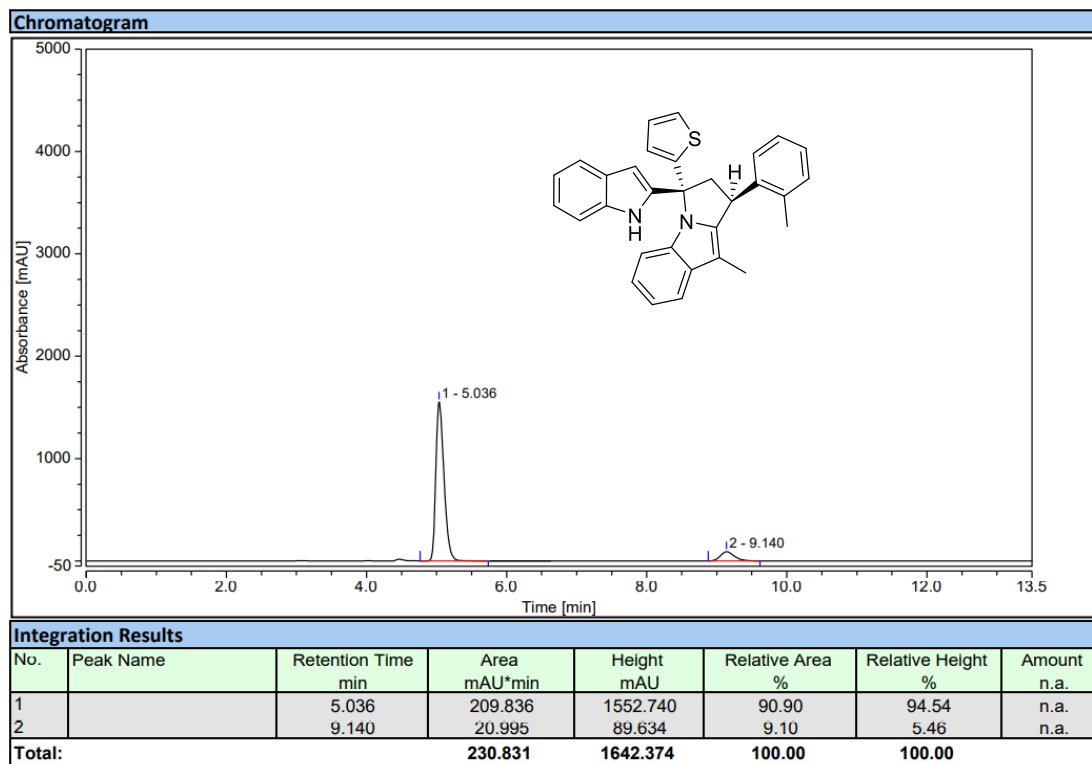



3ea

Racemic:

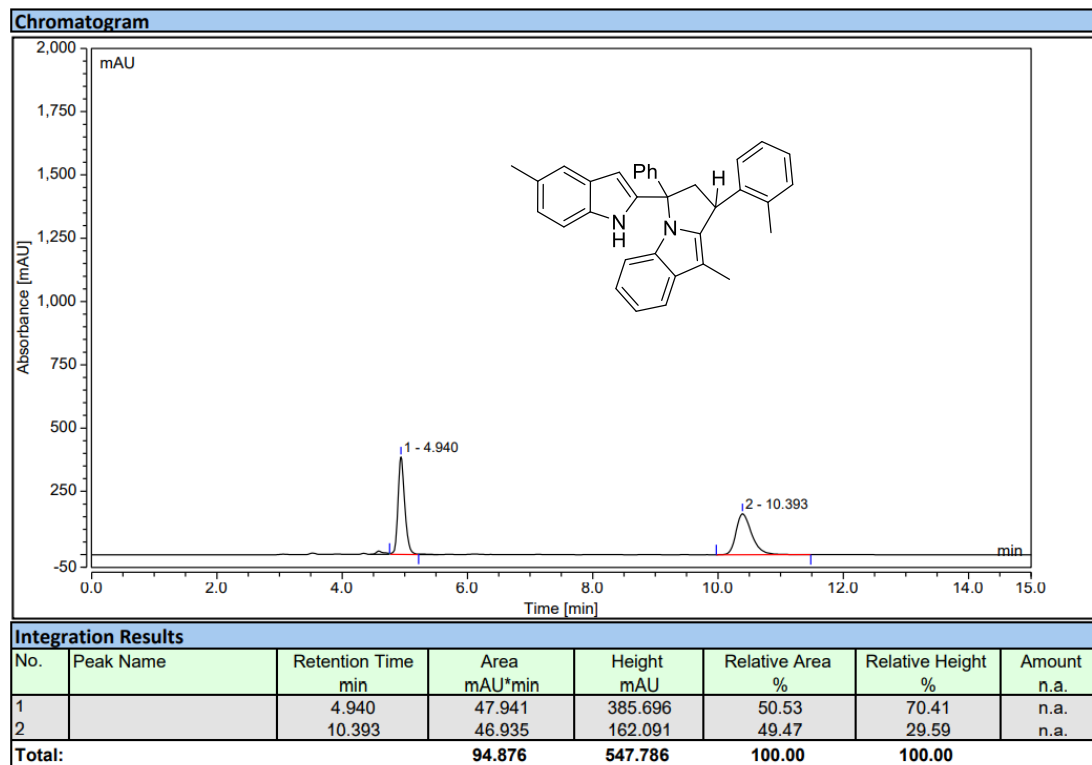

Enantioselective:

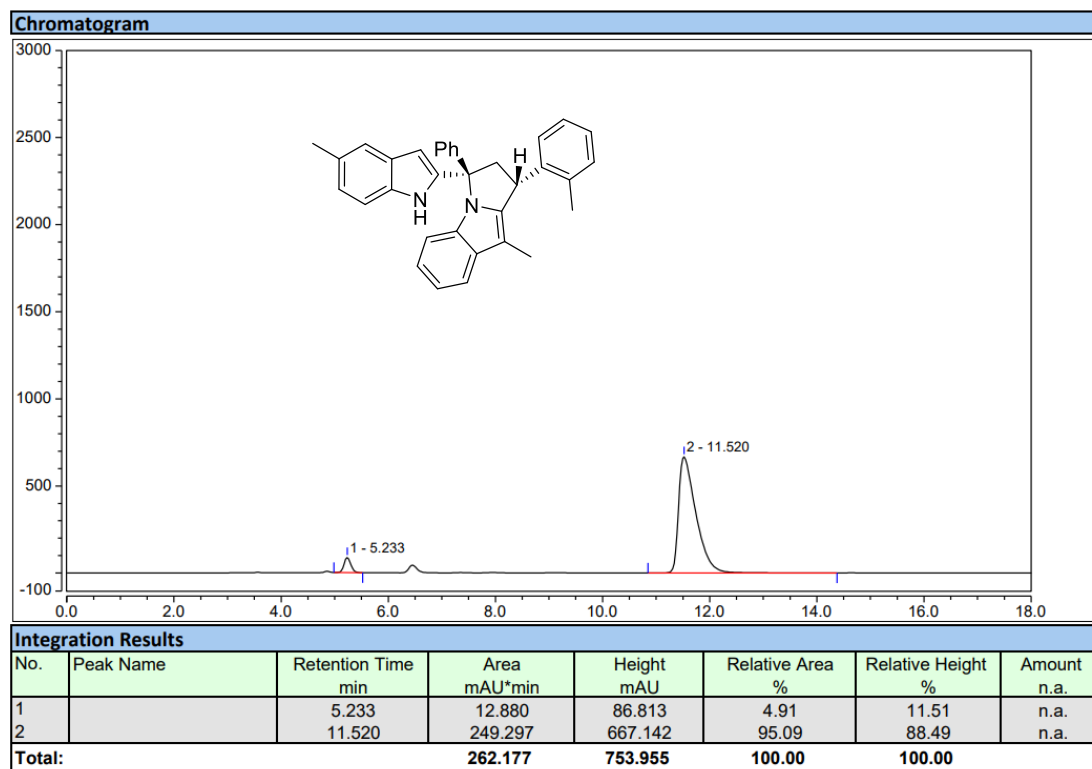

3fa

Racemic:

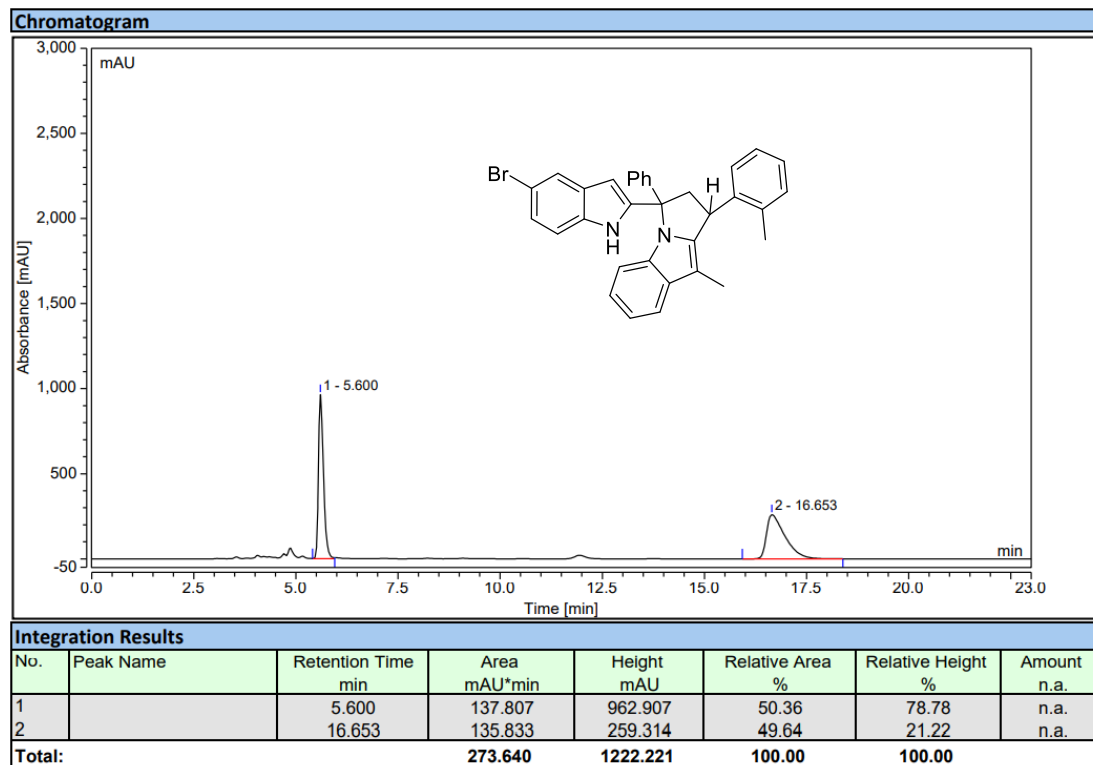

Enantioselective:

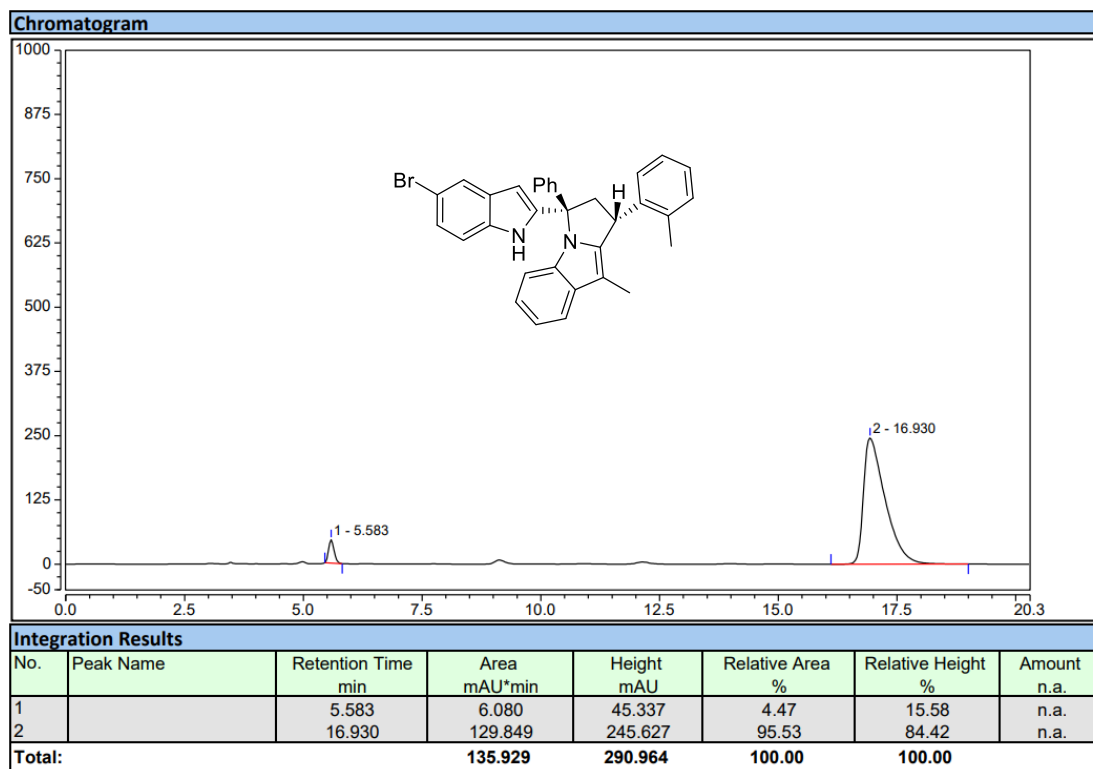

3ga

Racemic:

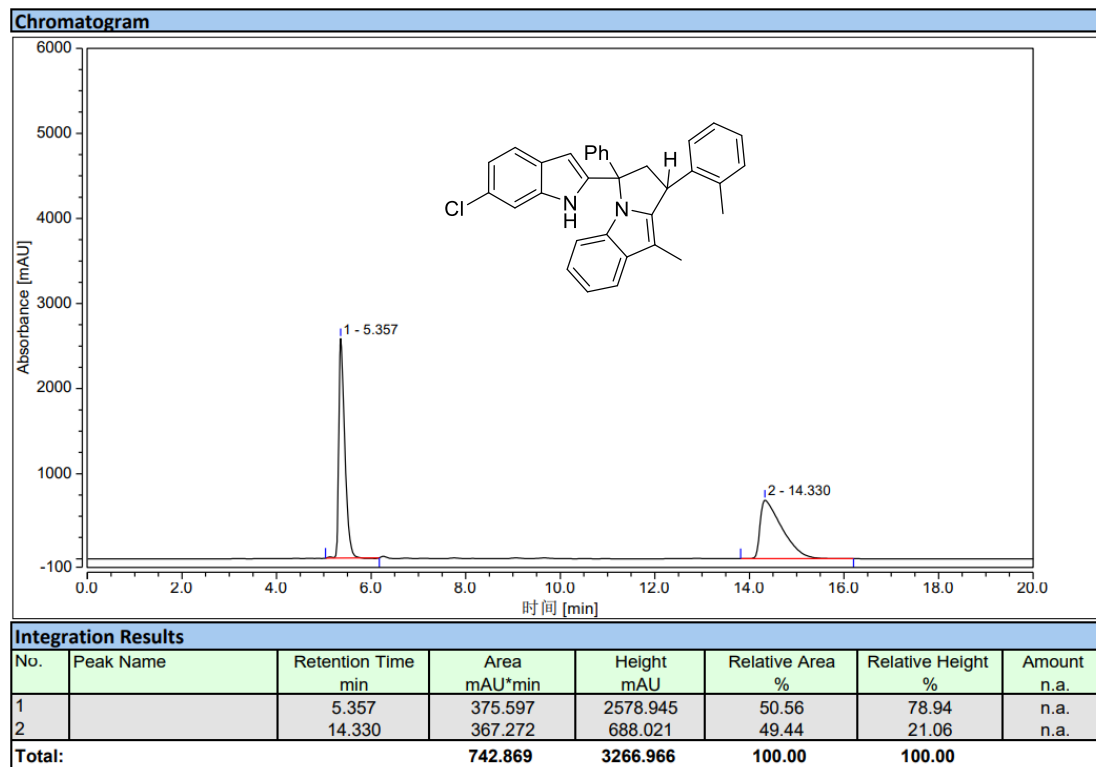

Enantioselective:

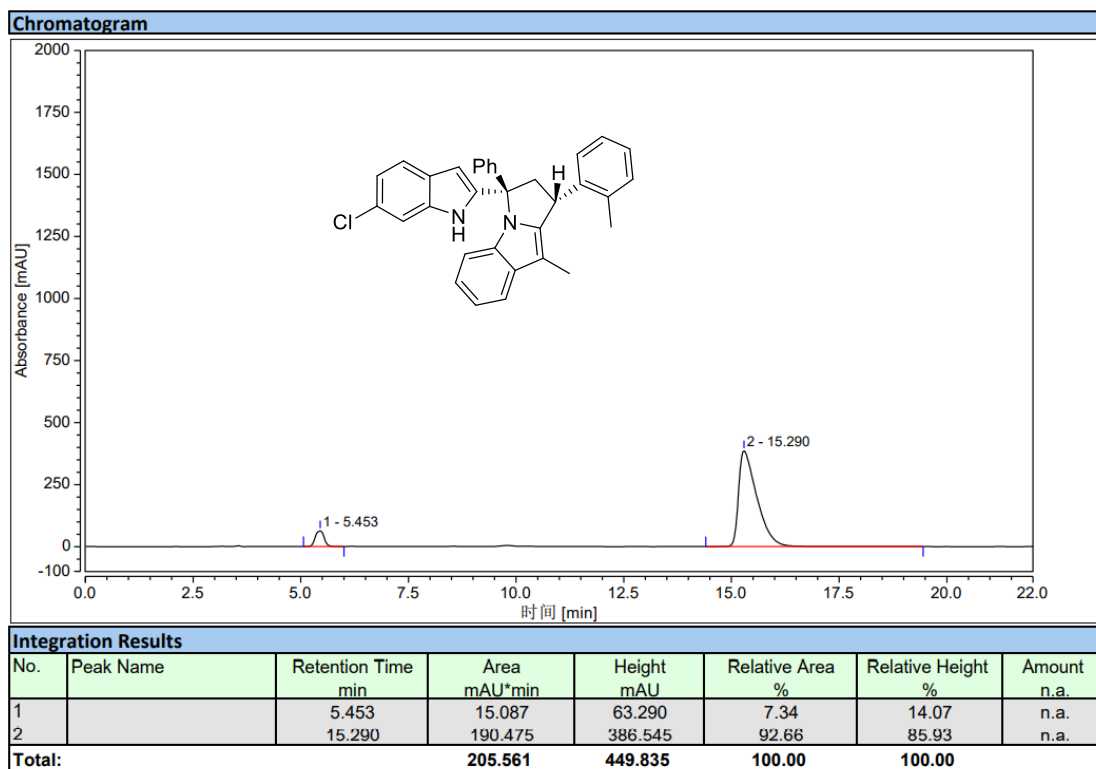

6

Racemic:

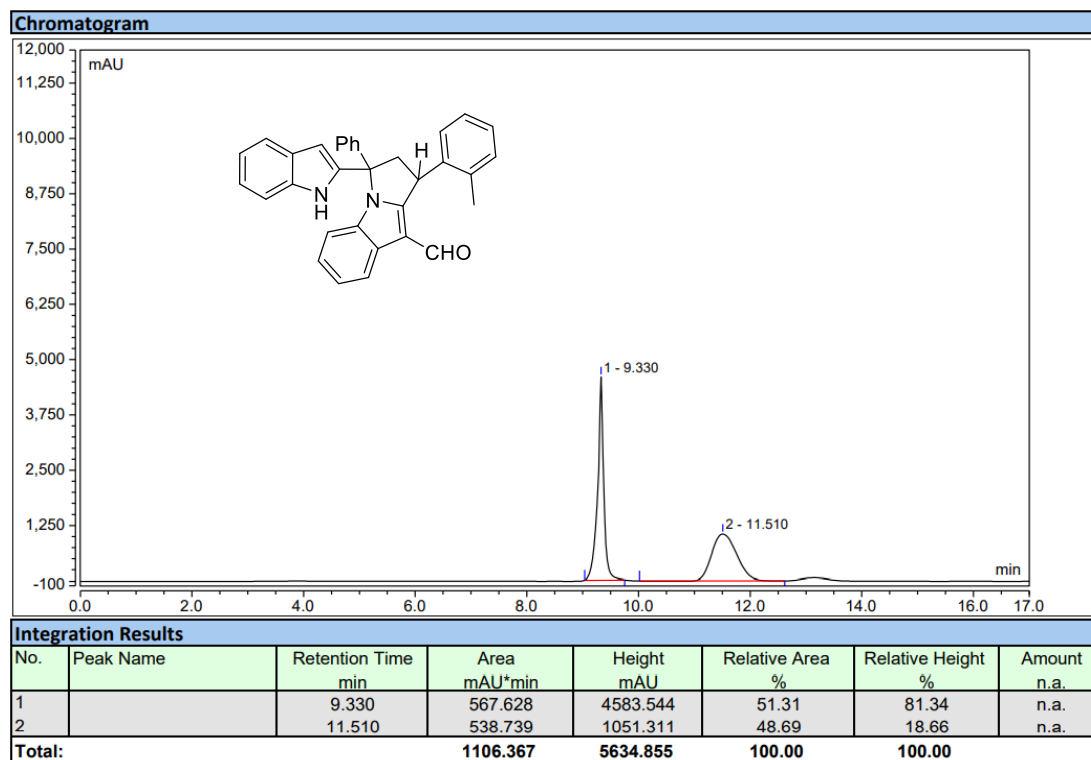

Enantioselective:

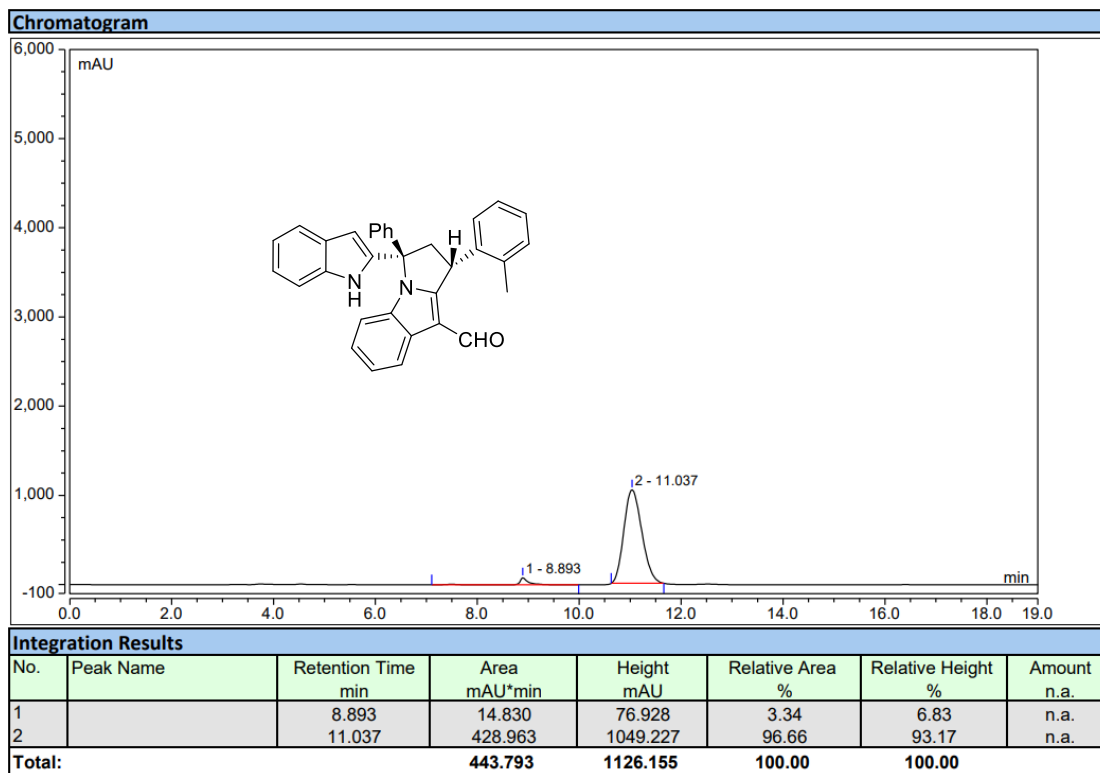

7

Racemic:

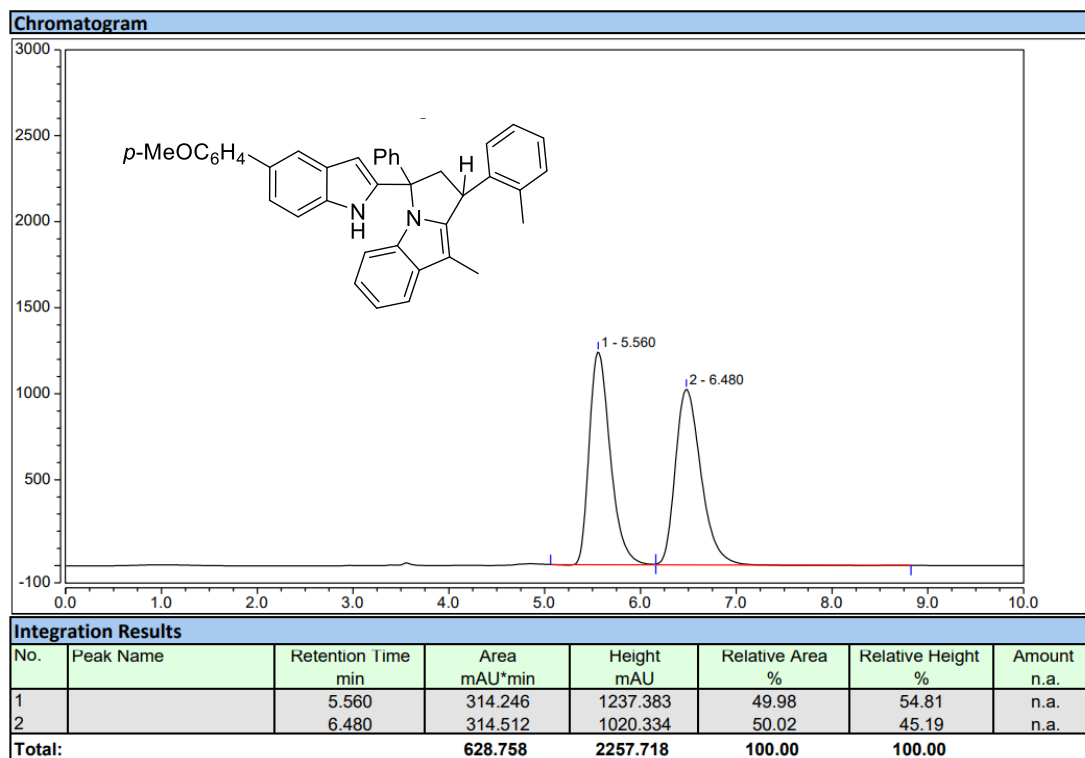

Enantioselective:

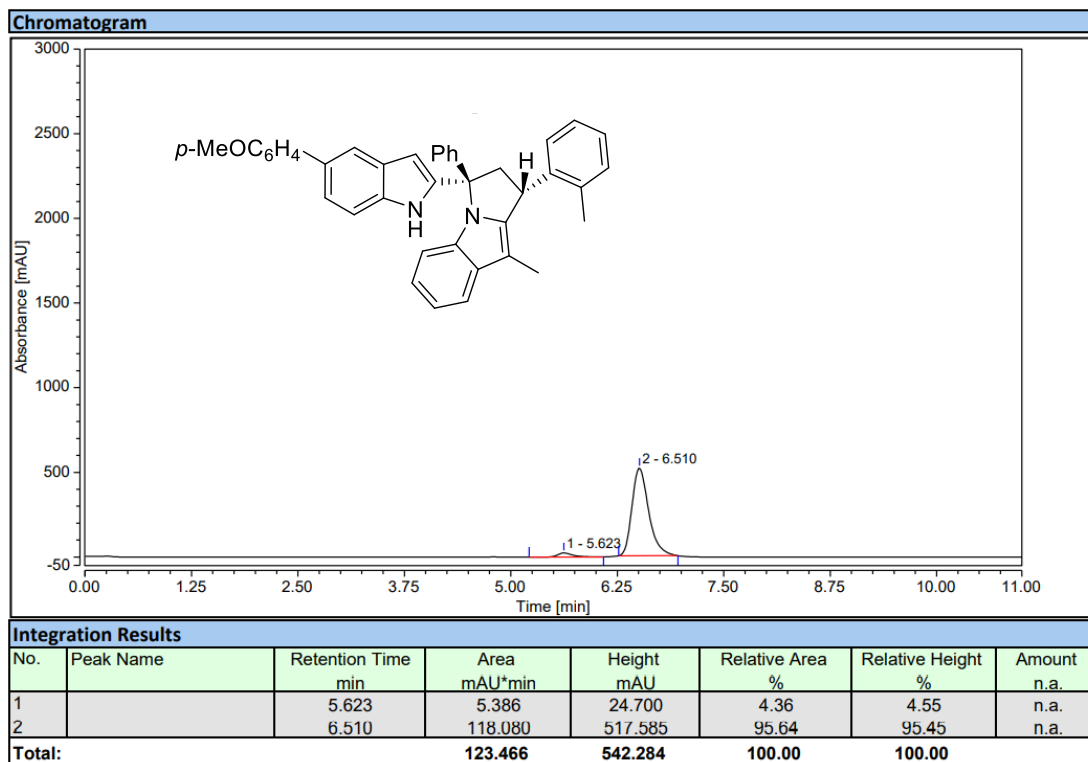

## 10. X-ray single-crystal data for compounds 3aa

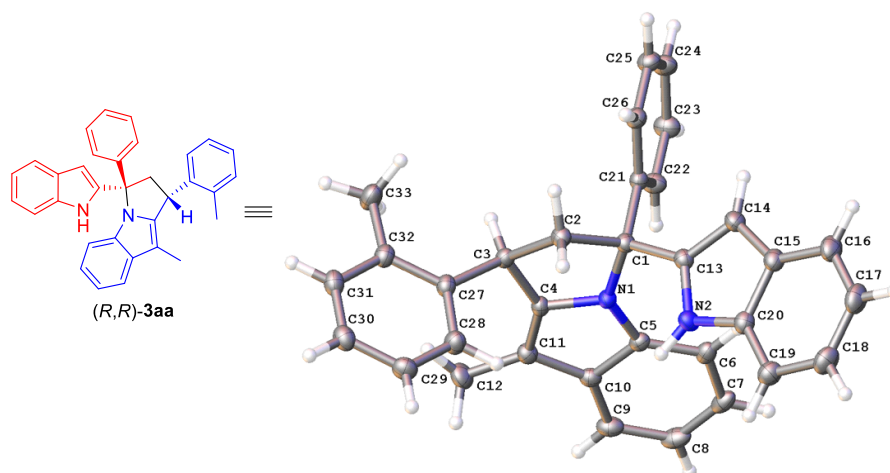

|                                             |                                                               |
|---------------------------------------------|---------------------------------------------------------------|
| Empirical formula                           | C <sub>39</sub> H <sub>42</sub> N <sub>2</sub>                |
| Formula weight                              | 538.74                                                        |
| Temperature/K                               | 173.01                                                        |
| Crystal system                              | orthorhombic                                                  |
| Space group                                 | P2 <sub>1</sub> 2 <sub>1</sub> 2 <sub>1</sub>                 |
| a/Å                                         | 9.3855(7)                                                     |
| b/Å                                         | 14.3714(11)                                                   |
| c/Å                                         | 23.0972(18)                                                   |
| α/°                                         | 90                                                            |
| β/°                                         | 90                                                            |
| γ/°                                         | 90                                                            |
| Volume/Å <sup>3</sup>                       | 3115.4(4)                                                     |
| Z                                           | 4                                                             |
| ρ <sub>calc</sub> /cm <sup>3</sup>          | 1.149                                                         |
| μ/mm <sup>-1</sup>                          | 0.321                                                         |
| F(000)                                      | 1160.0                                                        |
| Crystal size/mm <sup>3</sup>                | 0.08 × 0.06 × 0.05                                            |
| Radiation                                   | GaKα (λ = 1.34139)                                            |
| 2θ range for data collection/°              | 6.302 to 109.946                                              |
| Index ranges                                | -11 ≤ h ≤ 8, -17 ≤ k ≤ 17, -28 ≤ l ≤ 28                       |
| Reflections collected                       | 32572                                                         |
| Independent reflections                     | 5870 [R <sub>int</sub> = 0.0305, R <sub>sigma</sub> = 0.0178] |
| Data/restraints/parameters                  | 5870/0/374                                                    |
| Goodness-of-fit on F <sup>2</sup>           | 1.053                                                         |
| Final R indexes [I ≥ 2σ (I)]                | R <sub>1</sub> = 0.0429, wR <sub>2</sub> = 0.1175             |
| Final R indexes [all data]                  | R <sub>1</sub> = 0.0437, wR <sub>2</sub> = 0.1188             |
| Largest diff. peak/hole / e Å <sup>-3</sup> | 0.28/-0.26                                                    |
| Flack parameter                             | 0.08(13)                                                      |

## 11. Theoretical calculations

### Theoretical calculations of catalytic asymmetric formal (2 + 3) cycloaddition

**Computational Methods:** The DFT calculations of the possible transition states and intermediates in the reactions were performed by using the Gaussian 16 package.<sup>2</sup> The geometry optimizations of minima and transition states were carried out at the B3LYP-D3<sup>3</sup> with a Becke–Johnson (BJ)<sup>4</sup> damping function and the 6-31G(d)<sup>5</sup> basis set. The vibrational frequencies were computed at the same level to check whether each optimized structure is an energy minimum (zero imaginary frequency) or a transition state (one imaginary frequency) and to evaluate its zero-point vibration energy (ZPE) and thermal corrections at 298 K in kcal·mol<sup>-1</sup>. The single-point energies and solvent effects in ethylethanoate were computed with the dispersion-corrected density functional method B3LYP-D3 with a Becke–Johnson (BJ) damping function and the 6-311+G (d,p) basis set using the SDM solvation model.<sup>6</sup> DFT-optimized structures are illustrated using CYLView.<sup>7</sup>

To explain the observed high diastereoselectivity of the catalytic asymmetric formal (2 + 3)

---

<sup>2</sup> In Gaussian 16, rev. C.01.

<sup>3</sup> a) S. Grimme, J. Antony, S. Ehrlich and H. Krieg, A Consistent and Accurate *ab Initio* Parametrization of Density Functional Dispersion Correction (DFT-D) for the 94 Elements H-Pu, *J. Chem. Phys.* 2010, **132**, 154104; b) C. Lee, W. Yang and R. G. Parr, Development of the Colle-Salvetti Correlation-Energy Formula into a Functional of the Electron Density, *Phys. Rev. B*, 1988, **37**, 785.

<sup>4</sup> a) T. Korona, M. Przybytek and B. Jeziorski, Time-Independent Coupled Cluster Theory of the Polarization Propagator. Implementation and Application of the Singles and Doubles Model to Dynamic Polarizabilities and Van Der Waals Constants, *Mol. Phys.* 2006, **104**, 2303; b) S. Grimme, S. Ehrlich and L. Goerigk, Effect of the Damping Function in Dispersion Corrected Density Functional Theory, *J. Comput. Chem.* 2011, **32**, 1456.

<sup>5</sup> a) A. V. Marenich, C. J. Cramer and D. G. Truhlar, Universal Solvation Model Based on the Generalized Born Approximation with Asymmetric Descreening, *Theory Comput.* 2009, **5**, 2447; b) A. V. Marenich, C. J. Cramer and D. G. Truhlar, Universal Solvation Model Based on Solute Electron Density and on a Continuum Model of the Solvent Defined by the Bulk Dielectric Constant and Atomic Surface Tensions, *J. Phys. Chem. B*, 2009, **113**, 6378.

<sup>6</sup> a) H. Puthoff, Source of Vacuum Electromagnetic Zero-Point Energy, *Phys. Rev. A*, 1989, **40**, 4857; b) A. V. Marenich, C. J. Cramer and D. G. Truhlar, Performance of SM6, SM8, and SMD on the SAMPL1 Test Set for the Prediction of Small-Molecule Solvation Free Energies, *J. Phys. Chem. B*, 2009, **113**, 4538.

<sup>7</sup> C. Y. Legault, CYLView, 1.0b, Université de Sherbrook, 2009; [www.cylview.org](http://www.cylview.org).

cycloaddition, the key transition states **TS5** and **TS5'** of the diastereoselectivity-determining step were compared. Obviously, the H-bonds between CPA (*S*)-**5d** and the intermediate in **TS5** (1.589 Å and 1.770 Å) are shorter than those in **TS5'** (1.688 Å and 1.790 Å), which implied that the hydrogen-bonding interactions between (*S*)-**5d** and the intermediate in **TS5** are stronger than those in **TS5'**. Additionally, the Gibbs free energy of **TS5'** (-0.46 kcal·mol<sup>-1</sup>) is higher than that of **TS5** (-6.93 kcal·mol<sup>-1</sup>), and the energy difference between the two transition states is 6.47 kcal·mol<sup>-1</sup>. These results explained the excellent diastereoselectivity during the step of intramolecular addition and the formation of (1*R*,3*R*)-**3aa** as a major product.

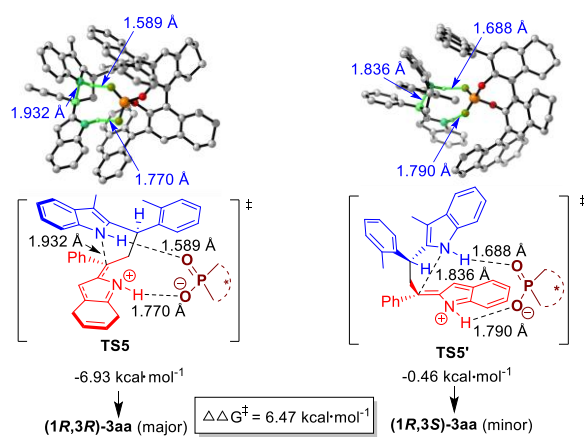

**Figure S1.** Key transition states leading to the diastereomers of **3aa**



**Table S1.** Electronic energies, enthalpies and free energies (in hartrees) computed at the level of

B3LYP-D3(BJ)-SMD(ethylethanoate)/6-311+G(d,p)//B3LYP-D3(BJ)/6-31G(d)

| Structure             | ZPE      | $\Delta H_{0\rightarrow T}$ | $\Delta G_{0\rightarrow T}$ | E            | H            | G            | Imaginary Frequency |
|-----------------------|----------|-----------------------------|-----------------------------|--------------|--------------|--------------|---------------------|
| <b>1a</b>             | 0.272377 | 0.288020                    | 0.230317                    | -749.007080  | -748.719060  | -748.776763  |                     |
| <b>Int1</b>           | 1.002933 | 1.060280                    | 0.909864                    | -3243.705696 | -3242.645416 | -3242.795832 |                     |
| <b>TS1</b>            | 1.000217 | 1.057557                    | 0.908166                    | -3243.683473 | -3242.625916 | -3242.775307 | -79.00i             |
| <b>Int2'</b>          | 0.999461 | 1.057293                    | 0.905237                    | -3243.688104 | -3242.630811 | -3242.782867 |                     |
| <b>Int2</b>           | 0.973841 | 1.029945                    | 0.882417                    | -3167.207399 | -3166.177454 | -3166.324982 |                     |
| <b>TS2</b>            | 0.969677 | 1.024988                    | 0.880132                    | -3167.194131 | -3166.169143 | -3166.313999 | -1187.43i           |
| <b>8a</b>             | 0.244868 | 0.258839                    | 0.204627                    | -672.532841  | -672.274002  | -672.328214  |                     |
| <b>2a</b>             | 0.300123 | 0.317932                    | 0.254986                    | -788.343487  | -788.025555  | -788.088501  |                     |
| <b>Int3</b>           | 1.030585 | 1.089793                    | 0.936358                    | -3283.039044 | -3281.949251 | -3282.102686 |                     |
| <b>TS3</b>            | 1.027671 | 1.086723                    | 0.933698                    | -3283.015688 | -3281.928965 | -3282.08199  | -148.47i            |
| <b>Int4'</b>          | 1.028426 | 1.088649                    | 0.935010                    | -3283.029723 | -3281.941074 | -3282.094713 |                     |
| <b>Int4</b>           | 1.002629 | 1.060337                    | 0.911422                    | -3206.549355 | -3205.489018 | -3205.637933 |                     |
| <b>Int5</b>           | 1.250427 | 1.322583                    | 1.141519                    | -3879.126127 | -3877.803544 | -3877.984608 |                     |
| <b>TS4</b>            | 1.251219 | 1.322193                    | 1.144858                    | -3879.115803 | -3877.79361  | -3877.970945 | -286.68i            |
| <b>Int6</b>           | 1.253166 | 1.324067                    | 1.146770                    | -3879.133032 | -3877.808965 | -3877.986262 |                     |
| <b>TS5</b>            | 1.253523 | 1.323454                    | 1.150284                    | -3879.118791 | -3877.795337 | -3877.968507 | -256.04i            |
| <b>(R,R)-3aa</b>      | 0.523116 | 0.552317                    | 0.462920                    | -1384.440947 | -1383.88863  | -1383.978027 |                     |
| <b>Int5'</b>          | 1.250589 | 1.322616                    | 1.143563                    | -3879.125286 | -3877.80267  | -3877.981723 |                     |
| <b>TS4'</b>           | 1.251740 | 1.322375                    | 1.147856                    | -3879.109409 | -3877.787034 | -3877.961553 | -196.19i            |
| <b>(S)-5d</b>         | 0.727462 | 0.769444                    | 0.652644                    | -2494.655748 | -2493.886304 | -2494.003104 |                     |
| <b>H<sub>2</sub>O</b> | 0.021169 | 0.024947                    | 0.003502                    | -76.465854   | -76.440907   | -76.462352   |                     |
| <b>TS5'</b>           | 1.254621 | 1.324337                    | 1.148641                    | -3879.106835 | -3877.782498 | -3877.958194 | -189.61i            |
| <b>(R,S)-3aa</b>      | 0.523154 | 0.552310                    | 0.462965                    | -1384.440702 | -1383.888392 | -1383.977737 |                     |

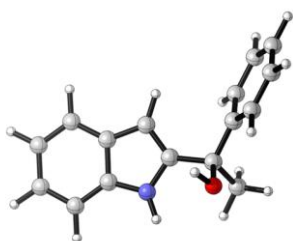

**1a**

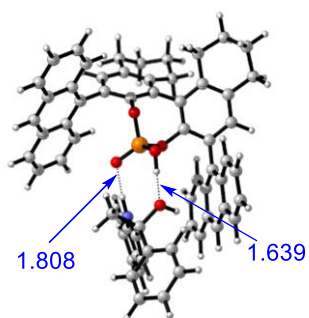

**Int1**

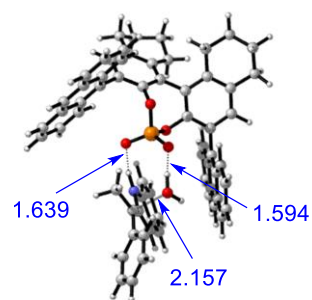

**TS1**

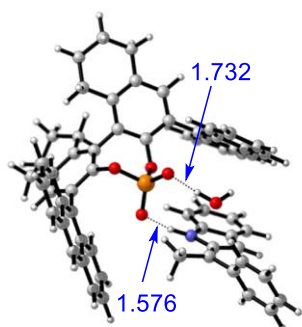

**Int2'**

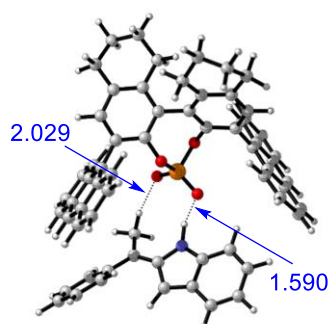

**Int2**

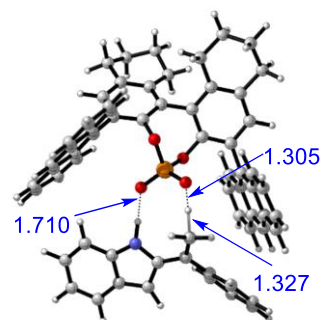

**TS2**

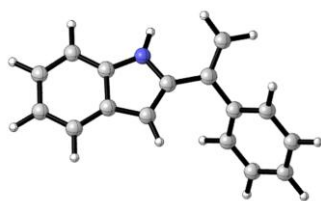

**8a**

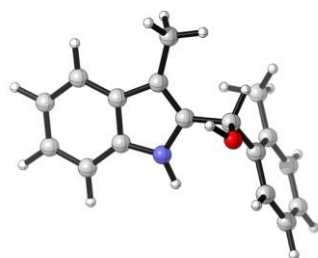

**2a**

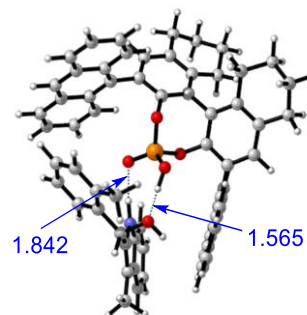

**Int3**

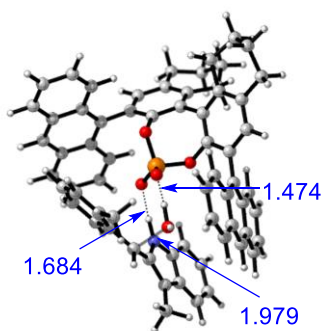

**TS3**

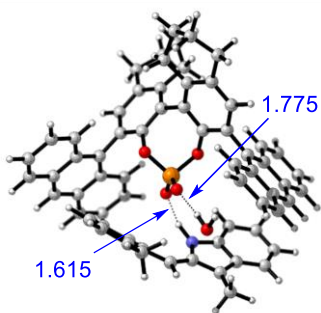

**Int4'**

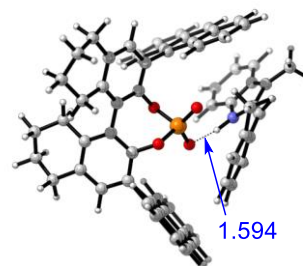

**Int4**

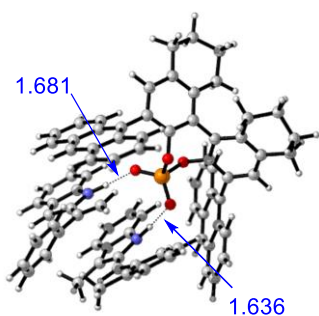

**Int5**

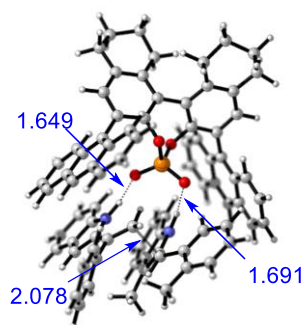

**TS4**

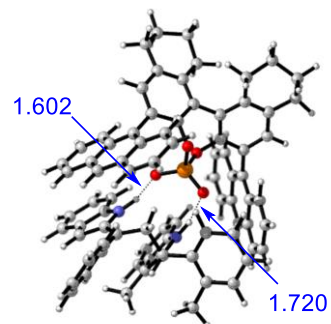

**Int6**

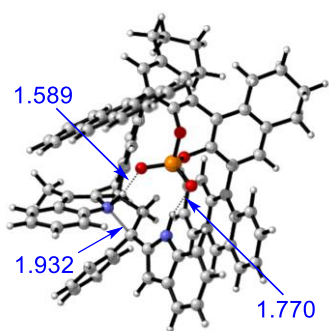

**TS5**

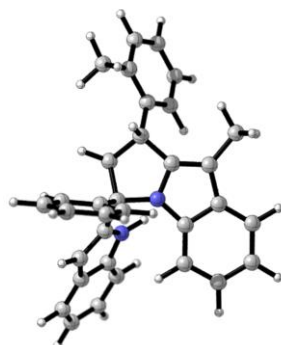

**(R,R)-3aa**

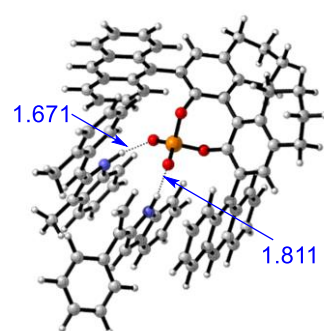

**Int5'**

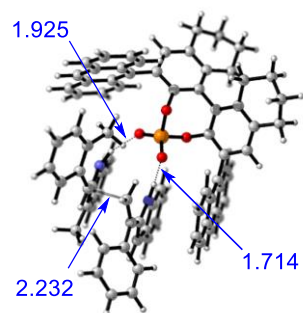

**TS4'**

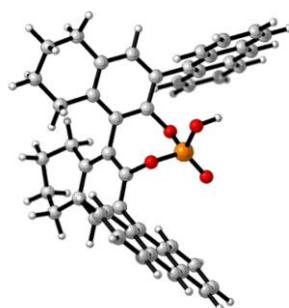

**(S)-5d**

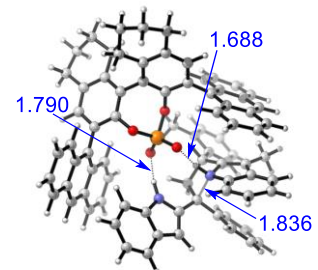

**TS5'**

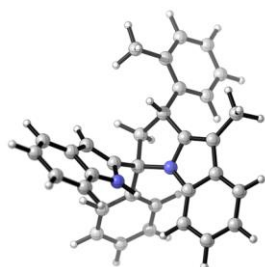

**(R,S)-3aa**

**Figure S2.** Quantum chemistry method-optimized structures (distances are shown in angstroms).

**Cartesian coordinates of DFT-computed structures:**

**1a**

|   |             |             |             |
|---|-------------|-------------|-------------|
| C | -2.58190500 | 0.49027200  | 0.00171000  |
| C | -2.12754300 | -0.85801800 | -0.05595900 |
| C | -3.07587100 | -1.88921500 | -0.15707200 |
| C | -4.42469800 | -1.56221000 | -0.20759500 |
| C | -4.85083500 | -0.21932000 | -0.15748000 |
| C | -3.93808600 | 0.82391900  | -0.05158600 |
| C | -0.31776700 | 0.50210600  | 0.09996000  |
| C | -0.69180900 | -0.81680600 | -0.00025800 |
| H | -2.75559000 | -2.92682800 | -0.19849500 |
| H | -5.16679000 | -2.35140700 | -0.28750800 |
| H | -5.91278500 | 0.00503500  | -0.20044100 |
| H | -4.26748600 | 1.85849600  | -0.00928200 |
| H | -0.02112000 | -1.66205600 | -0.02815100 |
| N | -1.46359500 | 1.28972200  | 0.11628300  |
| H | -1.44239600 | 2.29287300  | 0.01422200  |
| C | 1.02497100  | 1.19506800  | 0.14390200  |
| C | 2.18022200  | 0.20119300  | 0.02662100  |
| C | 2.32598200  | -0.83252500 | 0.96236700  |
| C | 3.13601900  | 0.33242500  | -0.98295300 |
| C | 3.39049900  | -1.72696500 | 0.87358800  |
| H | 1.59754800  | -0.94311200 | 1.75992100  |
| C | 4.20371200  | -0.56297700 | -1.07317100 |
| H | 3.05353100  | 1.15270200  | -1.68710100 |
| C | 4.33292400  | -1.59779600 | -0.14883700 |
| H | 3.48488300  | -2.52472500 | 1.60513100  |
| H | 4.93704900  | -0.44527000 | -1.86626700 |
| H | 5.16312000  | -2.29489300 | -0.21859100 |
| O | 1.04650400  | 2.16942400  | -0.91959700 |
| H | 0.82734400  | 1.69223000  | -1.73758600 |
| C | 1.19162900  | 2.02984500  | 1.42483200  |
| H | 0.37513500  | 2.75091400  | 1.52538800  |
| H | 1.19735400  | 1.38413900  | 2.30602000  |
| H | 2.13868000  | 2.57447400  | 1.37712300  |

**Int1**

|   |             |             |             |
|---|-------------|-------------|-------------|
| H | -1.31058300 | 0.04709300  | -1.80431700 |
| C | 3.26907800  | 0.90516800  | 0.31922700  |
| C | 3.00267500  | -0.31288900 | -0.31451400 |
| C | 3.68856600  | -1.49070500 | -0.01446100 |
| C | 4.70887500  | -1.40363200 | 0.93251000  |
| H | 5.26390700  | -2.30547600 | 1.17715100  |

|   |             |             |             |
|---|-------------|-------------|-------------|
| C | 2.43597800  | 2.09722300  | -0.01599000 |
| C | 1.04941900  | 1.99746500  | 0.13225700  |
| C | 0.18175600  | 3.07554200  | -0.06190200 |
| C | 0.76565300  | 4.29180200  | -0.42296200 |
| H | 0.12050400  | 5.15549500  | -0.56094300 |
| O | 1.96851000  | -0.36585000 | -1.26089700 |
| O | 0.50237200  | 0.75961800  | 0.47530100  |
| P | 0.46041100  | -0.39038800 | -0.67666400 |
| O | -0.32153900 | 0.17627000  | -1.92474800 |
| O | -0.01752200 | -1.65762000 | -0.07424900 |
| C | 4.98945000  | -0.21902100 | 1.62073100  |
| C | 6.09769600  | -0.22567100 | 2.65897000  |
| C | 4.24042600  | 0.93984200  | 1.34634100  |
| C | 5.94945500  | 0.87565600  | 3.71052000  |
| H | 7.06076200  | -0.09449800 | 2.14268500  |
| H | 6.14392900  | -1.21190900 | 3.13550100  |
| C | 4.37027300  | 2.16329500  | 2.24079900  |
| C | 5.68445700  | 2.21518500  | 3.02280200  |
| H | 6.85084800  | 0.92276800  | 4.33227500  |
| H | 5.11030800  | 0.63926300  | 4.37910600  |
| H | 4.23234000  | 3.08593700  | 1.67521200  |
| H | 3.53176300  | 2.13520200  | 2.95379200  |
| H | 5.64319400  | 3.03108200  | 3.75354900  |
| H | 6.51359400  | 2.44259100  | 2.33761600  |
| C | 2.98314100  | 3.30946100  | -0.49026800 |
| C | 4.43821700  | 3.37604800  | -0.92246400 |
| C | 2.13792900  | 4.42061000  | -0.66108400 |
| C | 4.98968500  | 4.80201800  | -0.98345500 |
| H | 4.50038100  | 2.92685800  | -1.92542000 |
| H | 5.06584900  | 2.74745500  | -0.28770700 |
| C | 2.68087400  | 5.77699300  | -1.07582200 |
| C | 4.04015800  | 5.70239100  | -1.77586700 |
| H | 5.98808200  | 4.79141000  | -1.43548700 |
| H | 5.10500800  | 5.19947900  | 0.03516400  |
| H | 1.94709300  | 6.28541200  | -1.71247500 |
| H | 2.78105900  | 6.40089800  | -0.17474000 |
| H | 4.45587700  | 6.71009900  | -1.88965300 |
| H | 3.91468100  | 5.29178700  | -2.78717900 |
| C | -1.29072200 | 2.91167200  | 0.07315900  |
| C | -1.84915800 | 2.52893000  | 1.31546600  |
| C | -2.12042200 | 3.11483000  | -1.05441500 |
| C | -3.27312800 | 2.31945800  | 1.42163500  |
| C | -3.55302100 | 2.97334200  | -0.91590400 |
| C | -4.08726200 | 2.55666100  | 0.30827100  |

|   |             |             |             |
|---|-------------|-------------|-------------|
| C | 3.27434500  | -2.79354200 | -0.60619100 |
| C | 3.64199300  | -3.12432000 | -1.92535600 |
| C | 2.48058000  | -3.66928200 | 0.16457200  |
| C | 3.21119900  | -4.38161300 | -2.48712100 |
| C | 2.04935500  | -4.92118700 | -0.40948100 |
| C | 2.43049100  | -5.24530000 | -1.71397600 |
| C | -1.05764500 | 2.32622200  | 2.48839500  |
| C | -3.82265700 | 1.87407300  | 2.66112900  |
| C | -1.62435500 | 1.90117700  | 3.65974500  |
| C | -3.02319800 | 1.66211700  | 3.74914200  |
| H | -4.89038500 | 1.68575800  | 2.71268800  |
| H | -3.44619700 | 1.28317100  | 4.67248800  |
| H | -1.00039400 | 1.73392800  | 4.53262500  |
| H | 0.00919800  | 2.50754200  | 2.43817200  |
| H | -5.16081000 | 2.40761800  | 0.39499000  |
| C | -1.60529000 | 3.40797600  | -2.35787100 |
| C | -2.44102300 | 3.60823700  | -3.42400100 |
| C | -4.39089900 | 3.21340200  | -2.04958200 |
| C | -3.85440100 | 3.52959200  | -3.26760300 |
| H | -5.46566400 | 3.11733200  | -1.92126800 |
| H | -4.50076200 | 3.70429200  | -4.12292300 |
| H | -2.02328700 | 3.82061000  | -4.40375700 |
| H | -0.53222000 | 3.45073900  | -2.49659400 |
| C | 3.59076100  | -4.70655500 | -3.82537100 |
| C | 4.43315600  | -2.25670800 | -2.74041600 |
| C | 1.22662900  | -5.79316900 | 0.36824800  |
| C | 2.04821700  | -3.35383900 | 1.49140000  |
| C | 4.34753900  | -3.84568100 | -4.57340400 |
| C | 4.77324300  | -2.60406900 | -4.02082200 |
| C | 0.83764200  | -5.45237100 | 1.63480600  |
| C | 1.25434200  | -4.21380700 | 2.20073200  |
| H | 3.26016600  | -5.65664700 | -4.23766300 |
| H | 4.62698100  | -4.10405600 | -5.59085200 |
| H | 5.37298600  | -1.92861400 | -4.62443500 |
| H | 4.76172400  | -1.31001300 | -2.32505800 |
| H | 0.90955900  | -6.73312300 | -0.07660400 |
| H | 0.20456800  | -6.11977400 | 2.21245200  |
| H | 0.92500600  | -3.94740400 | 3.20122400  |
| H | 2.34147600  | -2.40446500 | 1.92333600  |
| H | 2.10232100  | -6.18971000 | -2.14277600 |
| C | -2.79940000 | -1.61747700 | 2.56798500  |
| C | -4.20531500 | -1.44159600 | 2.72633700  |
| C | -4.74345900 | -1.41946000 | 4.02444500  |
| C | -3.88843800 | -1.55869200 | 5.11052300  |

|   |             |             |             |
|---|-------------|-------------|-------------|
| C | -2.49733500 | -1.72237400 | 4.92863700  |
| C | -1.93511200 | -1.75581400 | 3.65859400  |
| C | -3.70052000 | -1.40760500 | 0.51589500  |
| C | -4.74929000 | -1.30006300 | 1.40668200  |
| H | -5.81248700 | -1.29144700 | 4.17539500  |
| H | -4.29318100 | -1.54527700 | 6.11892300  |
| H | -1.85614200 | -1.82751500 | 5.79961900  |
| H | -0.86656600 | -1.87831600 | 3.50731900  |
| H | -5.78445900 | -1.13864200 | 1.14636900  |
| N | -2.52646800 | -1.60069100 | 1.22311000  |
| H | -1.59371200 | -1.67209700 | 0.81119200  |
| C | -3.65375000 | -1.28230700 | -0.98811900 |
| C | -5.04945700 | -1.15380100 | -1.59593700 |
| C | -6.02365500 | -2.12870400 | -1.34210500 |
| C | -5.35944000 | -0.10037500 | -2.45897500 |
| C | -7.28873000 | -2.03449000 | -1.91873300 |
| H | -5.79353300 | -2.95648200 | -0.67877100 |
| C | -6.62757800 | -0.00475700 | -3.03531600 |
| H | -4.60455100 | 0.64089000  | -2.68777500 |
| C | -7.59835900 | -0.96745000 | -2.76506600 |
| H | -8.03391400 | -2.79606800 | -1.70597300 |
| H | -6.85023400 | 0.82487500  | -3.70131100 |
| H | -8.58546100 | -0.89332900 | -3.21281500 |
| O | -2.86717000 | -0.09991700 | -1.31279500 |
| H | -3.20296200 | 0.65230500  | -0.79142000 |
| C | -2.90451800 | -2.44764300 | -1.65196400 |
| H | -1.89045100 | -2.54247800 | -1.25757700 |
| H | -3.44213400 | -3.38253200 | -1.47537200 |
| H | -2.85546800 | -2.27387800 | -2.73129400 |

### TS1

|   |             |             |             |
|---|-------------|-------------|-------------|
| H | 2.17643300  | 0.89399500  | -1.81756200 |
| C | -3.27875000 | -0.53055500 | 0.04732500  |
| C | -2.80056900 | 0.77775700  | -0.07864800 |
| C | -3.36927700 | 1.85398600  | 0.60832500  |
| C | -4.45209800 | 1.57747100  | 1.44254300  |
| H | -4.91654800 | 2.40050700  | 1.98011600  |
| C | -2.60198000 | -1.61322800 | -0.72633300 |
| C | -1.23045600 | -1.81307200 | -0.52314800 |
| C | -0.54579000 | -2.88774000 | -1.09937000 |
| C | -1.26131000 | -3.72398500 | -1.95531500 |
| H | -0.74765300 | -4.57102100 | -2.40382400 |
| O | -1.71469500 | 1.00764000  | -0.90562800 |
| O | -0.53673800 | -0.92732300 | 0.28120000  |

|   |             |             |             |
|---|-------------|-------------|-------------|
| P | -0.22376300 | 0.58491700  | -0.34721800 |
| O | 0.65339800  | 0.49771700  | -1.56319500 |
| O | 0.18271800  | 1.40929400  | 0.84691100  |
| C | -4.92387400 | 0.27578700  | 1.64484300  |
| C | -6.09224100 | 0.06353800  | 2.59139900  |
| C | -4.31767300 | -0.79706200 | 0.96700000  |
| C | -6.17322400 | -1.36129200 | 3.14382200  |
| H | -7.02678100 | 0.28599100  | 2.05379300  |
| H | -6.03607600 | 0.79146100  | 3.40958200  |
| C | -4.67992600 | -2.23121900 | 1.31976900  |
| C | -6.04318900 | -2.36930700 | 2.00129700  |
| H | -7.11588200 | -1.49981900 | 3.68627200  |
| H | -5.36086600 | -1.52592100 | 3.86542500  |
| H | -4.62831800 | -2.87821000 | 0.44211700  |
| H | -3.90067200 | -2.60761800 | 2.00076400  |
| H | -6.17000100 | -3.39552200 | 2.36596000  |
| H | -6.84256700 | -2.19124700 | 1.26764400  |
| C | -3.28328200 | -2.42056200 | -1.66359400 |
| C | -4.69739800 | -2.06341000 | -2.09060900 |
| C | -2.60381400 | -3.48945300 | -2.27381300 |
| C | -5.44027300 | -3.21992100 | -2.76215600 |
| H | -4.62492200 | -1.22532400 | -2.80048000 |
| H | -5.27441300 | -1.67637900 | -1.24838000 |
| C | -3.29857100 | -4.42993200 | -3.24351300 |
| C | -4.57128400 | -3.84115100 | -3.85712800 |
| H | -6.39077400 | -2.85948400 | -3.17261200 |
| H | -5.68631800 | -3.98706500 | -2.01374700 |
| H | -2.59519300 | -4.72724700 | -4.03075600 |
| H | -3.55988900 | -5.35600300 | -2.70878200 |
| H | -5.11799500 | -4.62006400 | -4.40155200 |
| H | -4.30557700 | -3.06555400 | -4.58857500 |
| C | 0.87488000  | -3.17095900 | -0.74374600 |
| C | 1.14160100  | -3.92986700 | 0.41590900  |
| C | 1.93282500  | -2.73197300 | -1.56499800 |
| C | 2.50187900  | -4.28066900 | 0.74308600  |
| C | 3.29597800  | -3.02581700 | -1.18777800 |
| C | 3.54436600  | -3.79637000 | -0.04966200 |
| C | -2.80932700 | 3.22758800  | 0.47183000  |
| C | -3.05374000 | 3.96929700  | -0.70293200 |
| C | -2.03057200 | 3.77202500  | 1.51410800  |
| C | -2.51003900 | 5.29979200  | -0.83118100 |
| C | -1.49727000 | 5.10687500  | 1.37942700  |
| C | -1.75149600 | 5.83369000  | 0.21391500  |
| C | 0.10094300  | -4.39555100 | 1.28024600  |



|   |             |             |             |
|---|-------------|-------------|-------------|
| C | 2.74745000  | -5.12295800 | 1.86920100  |
| C | 0.38044400  | -5.18481000 | 2.36446700  |
| C | 1.72026500  | -5.56861900 | 2.65619800  |
| H | 3.77517800  | -5.39822400 | 2.08900300  |
| H | 1.92180100  | -6.21091000 | 3.50913400  |
| H | -0.42631500 | -5.53170500 | 3.00415400  |
| H | -0.92283100 | -4.11897900 | 1.05551200  |
| H | 4.57038000  | -4.03615400 | 0.21811500  |
| C | 1.70688700  | -2.00339700 | -2.77409300 |
| C | 2.75286000  | -1.59212900 | -3.55771800 |
| C | 4.36002200  | -2.54195100 | -2.01011000 |
| C | 4.09954300  | -1.85552200 | -3.16808000 |
| H | 5.38253700  | -2.75347400 | -1.70730400 |
| H | 4.91675900  | -1.50765000 | -3.79423700 |
| H | 2.55991500  | -1.03122600 | -4.46675500 |
| H | 0.68935200  | -1.75744900 | -3.04782600 |
| C | -2.76492100 | 6.03959800  | -2.02648000 |
| C | -3.83164800 | 3.45354200  | -1.78580100 |
| C | -0.71294600 | 5.65060800  | 2.44324000  |
| C | -1.72034000 | 3.04108700  | 2.70356800  |
| C | -3.51152000 | 5.50563200  | -3.04163200 |
| C | -4.05197600 | 4.19412900  | -2.91646400 |
| C | -0.45603900 | 4.92219500  | 3.57254800  |
| C | -0.96362200 | 3.59741100  | 3.69892900  |
| H | -2.34920500 | 7.04087400  | -2.11003000 |
| H | -3.69638000 | 6.07860400  | -3.94607000 |
| H | -4.64320800 | 3.78018800  | -3.72852600 |
| H | -4.24619500 | 2.45558200  | -1.69788600 |
| H | -0.32399400 | 6.65991200  | 2.33140800  |
| H | 0.14171200  | 5.34711700  | 4.37447100  |
| H | -0.73339600 | 3.02017300  | 4.59010300  |
| H | -2.07693400 | 2.02259500  | 2.79338600  |
| H | -1.34676300 | 6.83893900  | 0.11605800  |
| C | 2.88195700  | -0.51502600 | 2.13923000  |
| C | 4.25157900  | -0.91832800 | 1.97866200  |
| C | 4.73378700  | -2.02754300 | 2.71905100  |
| C | 3.86100900  | -2.68820200 | 3.55192900  |
| C | 2.49176200  | -2.30389900 | 3.64965500  |
| C | 1.98225700  | -1.23017100 | 2.95197100  |
| C | 3.83414100  | 0.92700600  | 0.71674900  |
| C | 4.82454000  | -0.02335000 | 1.05866800  |
| H | 5.77079600  | -2.33843600 | 2.63021700  |
| H | 4.20443400  | -3.53916100 | 4.13126600  |
| H | 1.83032500  | -2.89240400 | 4.27670700  |

|   |            |             |             |
|---|------------|-------------|-------------|
| H | 0.93727300 | -0.94472600 | 2.99994100  |
| H | 5.83286200 | -0.04083000 | 0.67297100  |
| N | 2.66855100 | 0.59891500  | 1.39923300  |
| H | 1.72182500 | 1.01773200  | 1.25279900  |
| C | 3.90428700 | 2.00748200  | -0.19012900 |
| C | 5.23282300 | 2.43418900  | -0.70024000 |
| C | 6.31702200 | 2.54801600  | 0.18730400  |
| C | 5.40150300 | 2.84740700  | -2.03241900 |
| C | 7.54435300 | 3.04085200  | -0.25413700 |
| H | 6.18554100 | 2.28196100  | 1.22989800  |
| C | 6.63326300 | 3.32328000  | -2.47017700 |
| H | 4.57072200 | 2.74466100  | -2.71907100 |
| C | 7.70918700 | 3.42237100  | -1.58453300 |
| H | 8.36856900 | 3.13027900  | 0.44748500  |
| H | 6.75390200 | 3.61901500  | -3.50827500 |
| H | 8.66705000 | 3.80116400  | -1.92922500 |
| O | 3.15701700 | 1.07707500  | -1.98690000 |
| H | 3.56177400 | 0.19155900  | -1.99709100 |
| C | 2.82447100 | 3.05066000  | -0.22498400 |
| H | 1.82569700 | 2.65715700  | -0.03175700 |
| H | 3.05953500 | 3.78402400  | 0.55956500  |
| H | 2.83956800 | 3.57729700  | -1.18078100 |

**Int2'**

|   |             |             |             |
|---|-------------|-------------|-------------|
| H | 2.34087500  | 0.64891000  | -2.04689200 |
| C | -3.26811100 | 0.01921400  | 0.26488500  |
| C | -2.58938600 | 1.21616900  | 0.02236000  |
| C | -2.85265900 | 2.39135500  | 0.73435500  |
| C | -3.83519100 | 2.32982000  | 1.72098200  |
| H | -4.06596300 | 3.23159000  | 2.28300100  |
| C | -2.91066100 | -1.17962200 | -0.55223800 |
| C | -1.58321300 | -1.63112200 | -0.53191800 |
| C | -1.20449100 | -2.83573500 | -1.13666100 |
| C | -2.17927700 | -3.53895000 | -1.84288500 |
| H | -1.90436100 | -4.48202100 | -2.30929500 |
| O | -1.59894400 | 1.22143400  | -0.94379800 |
| O | -0.62856300 | -0.89054900 | 0.13468600  |
| P | -0.14612000 | 0.58084300  | -0.50217600 |
| O | 0.64864400  | 0.42092200  | -1.75727300 |
| O | 0.40963300  | 1.30423900  | 0.70145800  |
| C | -4.49645800 | 1.13733700  | 2.03992600  |
| C | -5.53202700 | 1.15514500  | 3.15082900  |
| C | -4.19836600 | -0.03801700 | 1.32756000  |
| C | -5.78363200 | -0.22360900 | 3.76503200  |

|   |             |             |             |
|---|-------------|-------------|-------------|
| H | -6.48079400 | 1.53769800  | 2.74416100  |
| H | -5.22602600 | 1.87103800  | 3.92311500  |
| C | -4.76198800 | -1.37610900 | 1.77953500  |
| C | -6.01027100 | -1.25152800 | 2.65607500  |
| H | -6.64331400 | -0.18035300 | 4.44410300  |
| H | -4.91468600 | -0.52560000 | 4.36628300  |
| H | -4.96254400 | -2.02632500 | 0.92598800  |
| H | -3.97266700 | -1.88822700 | 2.35152800  |
| H | -6.26529600 | -2.23226700 | 3.07480600  |
| H | -6.86469200 | -0.93714200 | 2.03954800  |
| C | -3.85605100 | -1.86115300 | -1.35060700 |
| C | -5.22328100 | -1.24636600 | -1.60135200 |
| C | -3.48408400 | -3.05538600 | -1.99166900 |
| C | -6.25789400 | -2.24913200 | -2.11631700 |
| H | -5.09259100 | -0.45057100 | -2.35046300 |
| H | -5.59421300 | -0.74003200 | -0.70784400 |
| C | -4.47365000 | -3.86551000 | -2.81114600 |
| C | -5.68191600 | -3.05317500 | -3.28325400 |
| H | -7.16865800 | -1.71806500 | -2.41690200 |
| H | -6.54222600 | -2.93673200 | -1.30662100 |
| H | -3.95655600 | -4.31663800 | -3.66664000 |
| H | -4.83225300 | -4.70708400 | -2.19867900 |
| H | -6.43698500 | -3.72203100 | -3.71283800 |
| H | -5.37561500 | -2.36198600 | -4.08055600 |
| C | 0.17069200  | -3.38412800 | -0.94788500 |
| C | 0.39980300  | -4.27298500 | 0.12479100  |
| C | 1.22070700  | -3.04044900 | -1.82299800 |
| C | 1.71348400  | -4.83835000 | 0.31662900  |
| C | 2.54699600  | -3.56015500 | -1.58277100 |
| C | 2.75816100  | -4.44453200 | -0.52193200 |
| C | -2.08119300 | 3.63307100  | 0.44201900  |
| C | -2.37440700 | 4.37069700  | -0.72479300 |
| C | -1.03818500 | 4.03795400  | 1.30092200  |
| C | -1.59892200 | 5.54596100  | -1.03979700 |
| C | -0.25805700 | 5.20667500  | 0.96875400  |
| C | -0.56064500 | 5.92989000  | -0.18728100 |
| C | -0.63389800 | -4.65143500 | 1.03924700  |
| C | 1.91239400  | -5.78656600 | 1.36584100  |
| C | -0.39859400 | -5.55390800 | 2.04358600  |
| C | 0.88886200  | -6.14194100 | 2.20304500  |
| H | 2.90225700  | -6.21969800 | 1.48439700  |
| H | 1.05381800  | -6.86875100 | 2.99379400  |
| H | -1.20118900 | -5.83205800 | 2.72108300  |
| H | -1.61840000 | -4.21408800 | 0.91812700  |

|   |             |             |             |
|---|-------------|-------------|-------------|
| H | 3.75420000  | -4.84864800 | -0.35579700 |
| C | 1.02019100  | -2.19568600 | -2.95797600 |
| C | 2.05696300  | -1.87578900 | -3.79252900 |
| C | 3.60868300  | -3.17642600 | -2.45906800 |
| C | 3.37088000  | -2.36505700 | -3.53793300 |
| H | 4.60554500  | -3.56331200 | -2.26204800 |
| H | 4.18299700  | -2.08971000 | -4.20544000 |
| H | 1.88670600  | -1.21709800 | -4.63794800 |
| H | 0.03327400  | -1.78914100 | -3.13499300 |
| C | -1.90829200 | 6.28394000  | -2.22323500 |
| C | -3.42397000 | 3.99862200  | -1.62138700 |
| C | 0.81979600  | 5.58881500  | 1.82668800  |
| C | -0.69052400 | 3.31330900  | 2.48383700  |
| C | -2.92153200 | 5.89140600  | -3.05522400 |
| C | -3.68876600 | 4.73218600  | -2.74716000 |
| C | 1.11485300  | 4.86680500  | 2.95137500  |
| C | 0.34532400  | 3.71469200  | 3.28268500  |
| H | -1.31536300 | 7.16713200  | -2.44837500 |
| H | -3.14504200 | 6.46051200  | -3.95331700 |
| H | -4.49039500 | 4.42915500  | -3.41492500 |
| H | -4.01361500 | 3.11758900  | -1.39401300 |
| H | 1.39823300  | 6.47133900  | 1.56385900  |
| H | 1.93469100  | 5.16976000  | 3.59750000  |
| H | 0.59627500  | 3.14220500  | 4.17139300  |
| H | -1.24657700 | 2.41555100  | 2.72207600  |
| H | 0.03014200  | 6.80981800  | -0.43329800 |
| C | 2.70123300  | -1.01631500 | 1.98149000  |
| C | 4.04183400  | -1.55147000 | 1.91516000  |
| C | 4.31522800  | -2.81060700 | 2.51955700  |
| C | 3.28406000  | -3.47431600 | 3.13270200  |
| C | 1.95385600  | -2.94560500 | 3.14062500  |
| C | 1.64041700  | -1.73311000 | 2.57290700  |
| C | 3.94927600  | 0.47671300  | 0.88327600  |
| C | 4.80372400  | -0.62137800 | 1.20917100  |
| H | 5.31874700  | -3.22463900 | 2.49378300  |
| H | 3.45812500  | -4.43727100 | 3.60043300  |
| H | 1.16496100  | -3.54410800 | 3.58256600  |
| H | 0.62881600  | -1.34568400 | 2.53948400  |
| H | 5.84284800  | -0.70167100 | 0.92689700  |
| N | 2.68333500  | 0.19358600  | 1.39049300  |
| H | 1.79329600  | 0.72077200  | 1.18102800  |
| C | 4.22976000  | 1.61172200  | 0.13408200  |
| C | 5.61067600  | 1.87411000  | -0.30266500 |
| C | 6.67237700  | 1.82177900  | 0.61842800  |

|   |            |             |             |
|---|------------|-------------|-------------|
| C | 5.87437300 | 2.24018600  | -1.63496300 |
| C | 7.97016100 | 2.12897400  | 0.21521900  |
| H | 6.46629300 | 1.58168100  | 1.65624700  |
| C | 7.17672000 | 2.52241400  | -2.03372500 |
| H | 5.05876200 | 2.22211200  | -2.34861500 |
| C | 8.22612500 | 2.47467500  | -1.11186100 |
| H | 8.77865500 | 2.10360900  | 0.93994400  |
| H | 7.37547800 | 2.77885800  | -3.07020500 |
| H | 9.23890600 | 2.70859000  | -1.42718300 |
| O | 3.32610800 | 0.64941700  | -2.14999900 |
| H | 3.53802600 | -0.29705300 | -2.17424900 |
| C | 3.22006600 | 2.68871200  | -0.08991200 |
| H | 2.18611000 | 2.35480300  | -0.00290300 |
| H | 3.38654500 | 3.46513000  | 0.67327000  |
| H | 3.38038700 | 3.15835200  | -1.06234000 |

**Int2**

|   |             |             |             |
|---|-------------|-------------|-------------|
| C | 2.81684900  | -1.55942500 | -0.60940700 |
| C | 2.86482100  | -0.39437000 | 0.16975200  |
| C | 3.80905700  | 0.61257500  | -0.06321600 |
| C | 4.73681600  | 0.39827900  | -1.08493300 |
| H | 5.49010500  | 1.16066900  | -1.26779300 |
| C | 1.76042300  | -2.56929200 | -0.30927400 |
| C | 0.42468800  | -2.14447500 | -0.32828800 |
| C | -0.63690100 | -3.03184000 | -0.12207300 |
| C | -0.31707900 | -4.36823900 | 0.12595300  |
| H | -1.12878600 | -5.07479000 | 0.28125400  |
| O | 1.95964000  | -0.24206800 | 1.19826000  |
| O | 0.16271300  | -0.80180700 | -0.51500800 |
| P | 0.38563600  | 0.14495000  | 0.84941400  |
| O | -0.46036300 | -0.35196700 | 1.97543100  |
| O | 0.29231900  | 1.56779000  | 0.35263300  |
| C | 4.69388900  | -0.72777300 | -1.91064500 |
| C | 5.73154800  | -0.86805300 | -3.00983900 |
| C | 3.69972800  | -1.70032200 | -1.70238500 |
| C | 5.28202800  | -1.78070800 | -4.15333700 |
| H | 6.65454500  | -1.28021400 | -2.57374400 |
| H | 5.99750200  | 0.12519300  | -3.39124500 |
| C | 3.49463600  | -2.81314100 | -2.71813500 |
| C | 4.72537700  | -3.08759900 | -3.58574900 |
| H | 6.12101600  | -1.97187100 | -4.83294800 |
| H | 4.49998200  | -1.28040600 | -4.74135200 |
| H | 3.15980900  | -3.73284900 | -2.23536200 |
| H | 2.66000200  | -2.51067200 | -3.36968900 |

|   |             |             |             |
|---|-------------|-------------|-------------|
| H | 4.46038900  | -3.78392500 | -4.39024600 |
| H | 5.50129600  | -3.57980200 | -2.98177100 |
| C | 2.05839900  | -3.90464900 | 0.03672900  |
| C | 3.49171600  | -4.31730800 | 0.32898200  |
| C | 1.00370100  | -4.81408900 | 0.22992400  |
| C | 3.71269300  | -5.83101200 | 0.28580200  |
| H | 3.73803400  | -3.94978100 | 1.33693400  |
| H | 4.19107400  | -3.81009700 | -0.33846200 |
| C | 1.25928600  | -6.28087000 | 0.52945400  |
| C | 2.64712400  | -6.54697400 | 1.11760400  |
| H | 4.71923400  | -6.06716200 | 0.65081600  |
| H | 3.66019300  | -6.18397300 | -0.75437400 |
| H | 0.47841500  | -6.65873200 | 1.20055400  |
| H | 1.15693300  | -6.85469000 | -0.40447600 |
| H | 2.83626400  | -7.62632800 | 1.15640400  |
| H | 2.68870900  | -6.17676500 | 2.15131900  |
| C | -2.06054900 | -2.59428300 | -0.14573700 |
| C | -2.66611000 | -2.20607100 | -1.36219900 |
| C | -2.82303600 | -2.63434700 | 1.04301400  |
| C | -4.08070800 | -1.91867000 | -1.39597600 |
| C | -4.24190200 | -2.37176600 | 0.99167800  |
| C | -4.83561600 | -2.03660000 | -0.22636400 |
| C | 3.78857900  | 1.89491800  | 0.69134400  |
| C | 4.09549900  | 1.92661600  | 2.06849600  |
| C | 3.48076300  | 3.09067000  | 0.00300200  |
| C | 4.09573500  | 3.18714600  | 2.77155500  |
| C | 3.52113100  | 4.35013700  | 0.70810700  |
| C | 3.81731800  | 4.36423100  | 2.07292300  |
| C | -1.93145600 | -2.09644500 | -2.58401200 |
| C | -4.67976500 | -1.52604300 | -2.63273400 |
| C | -2.53970500 | -1.70340400 | -3.74664200 |
| C | -3.93308800 | -1.41176100 | -3.77439000 |
| H | -5.74751300 | -1.32352600 | -2.64255700 |
| H | -4.40011900 | -1.10905900 | -4.70776100 |
| H | -1.95696200 | -1.61570200 | -4.65914700 |
| H | -0.87186200 | -2.32154700 | -2.57425000 |
| H | -5.90392900 | -1.83965900 | -0.25961200 |
| C | -2.23170200 | -2.88706900 | 2.32099100  |
| C | -2.99371800 | -2.91599100 | 3.45847200  |
| C | -5.00505100 | -2.43579500 | 2.19877100  |
| C | -4.40101200 | -2.70284500 | 3.39817600  |
| H | -6.07499100 | -2.25498300 | 2.13899100  |
| H | -4.98954600 | -2.74324300 | 4.31107400  |
| H | -2.51987100 | -3.08615200 | 4.42067200  |

|   |             |             |             |
|---|-------------|-------------|-------------|
| H | -1.15780700 | -3.00389700 | 2.37872100  |
| C | 4.40143400  | 3.20383400  | 4.16718300  |
| C | 4.42856800  | 0.74797700  | 2.80567700  |
| C | 3.26787700  | 5.55854300  | -0.01172500 |
| C | 3.11242800  | 3.11253000  | -1.37997200 |
| C | 4.70068000  | 2.04899700  | 4.83680100  |
| C | 4.71804700  | 0.80583100  | 4.14248100  |
| C | 2.97723200  | 5.53660800  | -1.34918400 |
| C | 2.87858900  | 4.29254200  | -2.03599600 |
| H | 4.39226100  | 4.16028300  | 4.68416900  |
| H | 4.92998100  | 2.07441800  | 5.89851500  |
| H | 4.96180400  | -0.10443800 | 4.68291300  |
| H | 4.44395700  | -0.20272500 | 2.28654400  |
| H | 3.32306200  | 6.50000900  | 0.52936000  |
| H | 2.81325800  | 6.46581400  | -1.88910200 |
| H | 2.60210200  | 4.28082600  | -3.08658500 |
| H | 3.01029300  | 2.17083500  | -1.90443500 |
| H | 3.83932800  | 5.31441800  | 2.60232300  |
| C | -1.75252100 | 3.86760500  | -0.63966300 |
| C | -3.00430200 | 4.39867300  | -1.12589400 |
| C | -2.99851600 | 5.58613100  | -1.91051900 |
| C | -1.78823900 | 6.16436900  | -2.19922700 |
| C | -0.55952300 | 5.59762400  | -1.73060900 |
| C | -0.51383300 | 4.45681500  | -0.96070700 |
| C | -3.36272000 | 2.51476700  | 0.10943000  |
| C | -3.99942000 | 3.53920500  | -0.66537000 |
| H | -3.92996600 | 6.00952100  | -2.27392700 |
| H | -1.74885600 | 7.06799200  | -2.79985200 |
| H | 0.37302800  | 6.08819500  | -1.98824600 |
| H | 0.41425100  | 4.01611200  | -0.61628100 |
| H | -5.06762100 | 3.65416900  | -0.77518800 |
| N | -1.99759800 | 2.77978800  | 0.12318000  |
| H | -1.18659900 | 2.14986300  | 0.39027900  |
| C | -3.96979600 | 1.51340600  | 0.86596800  |
| C | -5.35214700 | 1.14428300  | 0.58049000  |
| C | -6.22349700 | 0.76908100  | 1.62348200  |
| C | -5.83861800 | 1.12790400  | -0.74449900 |
| C | -7.54417800 | 0.43254500  | 1.35394600  |
| H | -5.86674200 | 0.76844100  | 2.64677300  |
| C | -7.15783200 | 0.77752000  | -1.00924300 |
| H | -5.15372600 | 1.31654800  | -1.56206800 |
| C | -8.01585400 | 0.43496100  | 0.03766100  |
| H | -8.20825200 | 0.16390700  | 2.16982300  |
| H | -7.51035000 | 0.74917800  | -2.03583200 |

|   |             |            |             |
|---|-------------|------------|-------------|
| H | -9.04475300 | 0.15671200 | -0.17076100 |
| C | -3.22394700 | 0.84798200 | 1.96417900  |
| H | -2.78496200 | 1.58743100 | 2.64351400  |
| H | -3.83625000 | 0.13761100 | 2.51758700  |
| H | -2.34911600 | 0.28202600 | 1.59401300  |

**TS2**

|   |             |             |             |
|---|-------------|-------------|-------------|
| C | 2.92693400  | -1.36854900 | -0.58205600 |
| C | 2.74733700  | -0.16728000 | 0.11519000  |
| C | 3.56319100  | 0.94885300  | -0.09157200 |
| C | 4.59169700  | 0.81605800  | -1.02793000 |
| H | 5.24975400  | 1.66489700  | -1.19481700 |
| C | 2.01254900  | -2.50603900 | -0.27416000 |
| C | 0.63356400  | -2.29695000 | -0.39719700 |
| C | -0.30288000 | -3.29551400 | -0.11805600 |
| C | 0.19351600  | -4.54235000 | 0.26765600  |
| H | -0.51628800 | -5.33852700 | 0.47763700  |
| O | 1.70063500  | -0.08003800 | 1.02777300  |
| O | 0.18587600  | -1.03517200 | -0.77236300 |
| P | 0.19819200  | 0.12474800  | 0.39549300  |
| O | -0.73171700 | -0.30002000 | 1.53947300  |
| O | 0.00647800  | 1.44908800  | -0.26528700 |
| C | 4.76870500  | -0.34255300 | -1.78880600 |
| C | 5.89958300  | -0.38626100 | -2.80174000 |
| C | 3.90989900  | -1.43895000 | -1.59246500 |
| C | 5.68880200  | -1.42831400 | -3.90237900 |
| H | 6.83595900  | -0.61761000 | -2.27141100 |
| H | 6.03939100  | 0.61070500  | -3.23648000 |
| C | 3.95209400  | -2.62605500 | -2.54082700 |
| C | 5.28304700  | -2.76640300 | -3.28251900 |
| H | 6.60242700  | -1.53105600 | -4.49945900 |
| H | 4.89597100  | -1.09181900 | -4.58465000 |
| H | 3.70430700  | -3.55417200 | -2.02264700 |
| H | 3.14670000  | -2.48434500 | -3.27792000 |
| H | 5.19664900  | -3.54457000 | -4.04984600 |
| H | 6.06435300  | -3.09474400 | -2.58194000 |
| C | 2.48143800  | -3.74595700 | 0.21140000  |
| C | 3.94042000  | -3.91643700 | 0.60321100  |
| C | 1.55885000  | -4.78092000 | 0.44775200  |
| C | 4.37774100  | -5.37912600 | 0.70875500  |
| H | 4.07445200  | -3.43324200 | 1.58332900  |
| H | 4.59829500  | -3.37132900 | -0.07595100 |
| C | 2.00569400  | -6.16313100 | 0.89023000  |
| C | 3.38271900  | -6.17154500 | 1.55804700  |



|   |             |             |             |
|---|-------------|-------------|-------------|
| H | 5.38652900  | -5.43151400 | 1.13460300  |
| H | 4.43228500  | -5.82271100 | -0.29584700 |
| H | 1.25057400  | -6.59464600 | 1.55811700  |
| H | 2.03783800  | -6.82016300 | 0.00761600  |
| H | 3.72192300  | -7.20394900 | 1.70256900  |
| H | 3.31441800  | -5.71385700 | 2.55463100  |
| C | -1.76863900 | -3.03839100 | -0.16274600 |
| C | -2.42407700 | -2.84791200 | -1.39773900 |
| C | -2.49915900 | -3.00606000 | 1.04591000  |
| C | -3.85456100 | -2.65866500 | -1.42258400 |
| C | -3.93206200 | -2.83883900 | 1.00615500  |
| C | -4.57204200 | -2.67823900 | -0.22432100 |
| C | 3.34125100  | 2.23928200  | 0.61616900  |
| C | 3.54955700  | 2.33336800  | 2.00975700  |
| C | 2.97058300  | 3.38177600  | -0.12870800 |
| C | 3.39193300  | 3.60795200  | 2.66915300  |
| C | 2.86822700  | 4.66117600  | 0.53336100  |
| C | 3.07024100  | 4.73798700  | 1.91334500  |
| C | -1.72410600 | -2.83977700 | -2.64436100 |
| C | -4.50586500 | -2.45735300 | -2.67824500 |
| C | -2.38418200 | -2.63726700 | -3.82689800 |
| C | -3.79469500 | -2.44060000 | -3.84726700 |
| H | -5.58306300 | -2.31585600 | -2.67833400 |
| H | -4.30085000 | -2.28289900 | -4.79567900 |
| H | -1.82980100 | -2.62565700 | -4.76101400 |
| H | -0.65084900 | -2.99063000 | -2.63870700 |
| H | -5.64886900 | -2.54061400 | -0.24741200 |
| C | -1.87020400 | -3.09335000 | 2.32828500  |
| C | -2.60445100 | -3.04886900 | 3.48287700  |
| C | -4.66397700 | -2.81973500 | 2.23397300  |
| C | -4.02275300 | -2.92194700 | 3.43878400  |
| H | -5.74331000 | -2.71069400 | 2.18397600  |
| H | -4.58971300 | -2.90190800 | 4.36567900  |
| H | -2.10185500 | -3.10000100 | 4.44441600  |
| H | -0.79100300 | -3.16262600 | 2.37321600  |
| C | 3.59310100  | 3.68966600  | 4.08146000  |
| C | 3.93324200  | 1.21084900  | 2.80791200  |
| C | 2.56957400  | 5.82412600  | -0.24305100 |
| C | 2.67393600  | 3.32916900  | -1.52792500 |
| C | 3.94138600  | 2.58484900  | 4.80936500  |
| C | 4.11835900  | 1.33048600  | 4.15925100  |
| C | 2.35298500  | 5.73515900  | -1.59174700 |
| C | 2.38053700  | 4.46489400  | -2.23505000 |
| H | 3.46410500  | 4.65544500  | 4.56377400  |

|   |             |             |             |
|---|-------------|-------------|-------------|
| H | 4.08992700  | 2.65948000  | 5.88296300  |
| H | 4.40344800  | 0.46095300  | 4.74473300  |
| H | 4.07431900  | 0.25132000  | 2.32507400  |
| H | 2.52011900  | 6.78322800  | 0.26637600  |
| H | 2.13838800  | 6.62755400  | -2.17323600 |
| H | 2.15217800  | 4.39776100  | -3.29467600 |
| H | 2.66682300  | 2.36554900  | -2.02181900 |
| H | 2.98096100  | 5.70142900  | 2.41051700  |
| C | -2.09139100 | 4.21547600  | -0.45789000 |
| C | -3.42521700 | 4.54191100  | -0.86133900 |
| C | -3.65695700 | 5.74818800  | -1.56126400 |
| C | -2.57562500 | 6.55214900  | -1.86427700 |
| C | -1.25670600 | 6.18502400  | -1.48652500 |
| C | -0.99301000 | 5.02093900  | -0.78711600 |
| C | -3.41590900 | 2.54247400  | 0.22160200  |
| C | -4.24252600 | 3.46518800  | -0.44173400 |
| H | -4.66298300 | 6.02609800  | -1.86255700 |
| H | -2.72895700 | 7.48040500  | -2.40688300 |
| H | -0.42926500 | 6.83662600  | -1.75063300 |
| H | 0.01369100  | 4.73758400  | -0.50545900 |
| H | -5.31614700 | 3.38505500  | -0.53225500 |
| N | -2.11893800 | 3.04008100  | 0.24035800  |
| H | -1.28215100 | 2.43103300  | 0.28049000  |
| C | -3.80085500 | 1.36426700  | 0.92908300  |
| C | -5.05634400 | 0.71813200  | 0.51338800  |
| C | -5.94648300 | 0.21700100  | 1.47923300  |
| C | -5.41133400 | 0.63195300  | -0.84576600 |
| C | -7.17257400 | -0.31935800 | 1.09950800  |
| H | -5.68450800 | 0.28386200  | 2.52924300  |
| C | -6.63384700 | 0.08355600  | -1.22286200 |
| H | -4.71032500 | 0.97102000  | -1.59942300 |
| C | -7.52109900 | -0.38479200 | -0.25227100 |
| H | -7.86088800 | -0.68099900 | 1.85782700  |
| H | -6.88922300 | 0.01527300  | -2.27590200 |
| H | -8.47912600 | -0.80382900 | -0.54675500 |
| C | -3.01969400 | 0.85444700  | 1.98999700  |
| H | -2.48438000 | 1.60399100  | 2.57597100  |
| H | -3.46302200 | 0.04977400  | 2.57565200  |
| H | -1.91649900 | 0.24505800  | 1.57508200  |

**8a**

|   |            |             |             |
|---|------------|-------------|-------------|
| C | 2.50100100 | 0.57522400  | 0.18071800  |
| C | 2.06819000 | -0.68251800 | -0.33090500 |
| C | 3.02790400 | -1.67729600 | -0.58681300 |

|   |             |             |             |
|---|-------------|-------------|-------------|
| C | 4.36335200  | -1.40939000 | -0.31978200 |
| C | 4.76664700  | -0.16143000 | 0.19905500  |
| C | 3.84404400  | 0.84640700  | 0.45527000  |
| C | 0.24603300  | 0.64855100  | -0.04940500 |
| C | 0.64387100  | -0.60877700 | -0.45996200 |
| H | 2.72462400  | -2.64167000 | -0.98509100 |
| H | 5.11362500  | -2.17109400 | -0.51134300 |
| H | 5.81907500  | 0.01721100  | 0.39978900  |
| H | 4.15686500  | 1.80911600  | 0.85014200  |
| H | -0.01489100 | -1.37572400 | -0.84020900 |
| N | 1.38044800  | 1.36716400  | 0.31744300  |
| H | 1.34941700  | 2.24814100  | 0.80638600  |
| C | -1.08428600 | 1.25428400  | -0.02263100 |
| C | -2.25694400 | 0.34050300  | 0.03002500  |
| C | -3.39735400 | 0.60872500  | -0.74213900 |
| C | -2.26271200 | -0.78801200 | 0.86487100  |
| C | -4.51641900 | -0.21853100 | -0.67349000 |
| H | -3.39040600 | 1.46093200  | -1.41495800 |
| C | -3.38258600 | -1.61428200 | 0.93469000  |
| H | -1.38662800 | -1.00764000 | 1.46591500  |
| C | -4.51370700 | -1.33286700 | 0.16675000  |
| H | -5.38707100 | 0.00126600  | -1.28513100 |
| H | -3.37225700 | -2.47861800 | 1.59291500  |
| H | -5.38413800 | -1.98087000 | 0.21800400  |
| C | -1.25276100 | 2.59221000  | -0.04523000 |
| H | -0.41820200 | 3.27671600  | -0.16404400 |
| H | -2.23879500 | 3.03527000  | 0.03937500  |

**2a**

|   |             |             |             |
|---|-------------|-------------|-------------|
| C | 2.46048200  | 0.32845300  | 0.09080800  |
| C | 1.89731800  | -0.93212000 | -0.25580600 |
| C | 2.63885000  | -2.11630100 | -0.20528700 |
| C | 3.96638900  | -2.02506600 | 0.19680300  |
| C | 4.54555100  | -0.78607700 | 0.53990000  |
| C | 3.80539400  | 0.38823000  | 0.48972200  |
| C | 1.42348500  | 1.31869300  | -0.06098300 |
| C | 0.29479700  | 0.64600500  | -0.48194000 |
| H | 2.19464600  | -3.07165700 | -0.47040100 |
| H | 4.56966600  | -2.92701800 | 0.24695700  |
| H | 5.58675100  | -0.75398300 | 0.84765800  |
| H | 4.25843100  | 1.33957800  | 0.75565700  |
| N | 0.58705000  | -0.70543600 | -0.61069300 |
| H | -0.10745200 | -1.40621700 | -0.82269000 |
| C | 1.57483000  | 2.78477700  | 0.20559600  |

|   |             |             |             |
|---|-------------|-------------|-------------|
| H | 2.32895900  | 3.23885200  | -0.45029100 |
| H | 1.89835400  | 2.96947300  | 1.23794000  |
| H | 0.63638800  | 3.32699300  | 0.05416400  |
| C | -1.06620100 | 1.15752300  | -0.85787500 |
| H | -1.17641900 | 2.16327900  | -0.42902200 |
| O | -1.20875600 | 1.22913700  | -2.28297400 |
| H | -0.36822300 | 1.57127500  | -2.62484200 |
| C | -2.16170000 | 0.26029500  | -0.30721000 |
| C | -2.82576700 | -0.62803800 | -1.15716400 |
| C | -2.46718900 | 0.28001000  | 1.06901100  |
| C | -3.79445100 | -1.50178000 | -0.66029300 |
| H | -2.58599800 | -0.61094800 | -2.21398700 |
| C | -3.44302000 | -0.59986200 | 1.54650800  |
| C | -4.10433700 | -1.48775100 | 0.69719900  |
| H | -4.30541000 | -2.18351900 | -1.33447900 |
| H | -3.68565400 | -0.58746300 | 2.60630400  |
| H | -4.85782800 | -2.16057900 | 1.09708600  |
| C | -1.76121400 | 1.21423700  | 2.02160600  |
| H | -0.68015000 | 1.03419200  | 2.03509300  |
| H | -2.14086000 | 1.08967600  | 3.03973900  |
| H | -1.90380500 | 2.26564700  | 1.74017900  |

### Int3

|   |            |             |             |
|---|------------|-------------|-------------|
| C | 5.21585400 | 1.16807100  | 1.39507500  |
| C | 3.87238800 | 0.92758600  | 1.80364700  |
| C | 3.56314900 | 0.33847400  | 3.03320200  |
| C | 4.62274400 | -0.00942200 | 3.86079900  |
| C | 5.96186000 | 0.20841500  | 3.47263700  |
| C | 6.26685300 | 0.78807600  | 2.24672700  |
| C | 5.15694200 | 1.80594500  | 0.10503300  |
| C | 3.81672700 | 1.93852400  | -0.20526600 |
| H | 2.53247400 | 0.15100400  | 3.31812400  |
| H | 4.41633200 | -0.47450500 | 4.82044500  |
| H | 6.76410400 | -0.08036000 | 4.14627300  |
| H | 7.30094200 | 0.95815300  | 1.95745700  |
| N | 3.04686900 | 1.38620800  | 0.80820300  |
| H | 2.02452700 | 1.41246800  | 0.84359200  |
| C | 6.34251100 | 2.21936900  | -0.71100600 |
| H | 6.05015600 | 2.71059800  | -1.64436000 |
| H | 6.98504400 | 2.91824800  | -0.16033300 |
| H | 6.96797500 | 1.35596200  | -0.97673900 |
| C | 3.17510600 | 2.44960300  | -1.45541900 |
| H | 3.95025300 | 2.92516700  | -2.07093200 |
| O | 2.67607800 | 1.31433000  | -2.21837400 |

|   |             |             |             |
|---|-------------|-------------|-------------|
| H | 1.29153200  | 0.67288800  | -1.86898300 |
| C | 2.01923500  | 3.42235000  | -1.26151900 |
| C | 1.86197200  | 4.06375200  | -0.02768600 |
| C | 1.12202900  | 3.71478300  | -2.31256700 |
| C | 0.80533600  | 4.93742100  | 0.20814900  |
| H | 2.56630900  | 3.85920800  | 0.76993600  |
| C | 0.05945600  | 4.58872000  | -2.05052900 |
| C | -0.11269300 | 5.18824400  | -0.80632100 |
| H | 0.68665700  | 5.39410300  | 1.18497100  |
| H | -0.64757300 | 4.80063000  | -2.84881800 |
| H | -0.95735700 | 5.84681600  | -0.63499400 |
| C | 1.24653100  | 3.14930000  | -3.71048200 |
| H | 0.69526100  | 3.78064300  | -4.41479800 |
| H | 2.28692500  | 3.09256400  | -4.04424900 |
| H | 0.83824900  | 2.13622300  | -3.77459900 |
| H | 3.39602700  | 0.66262600  | -2.30635700 |
| C | -2.70906800 | -1.68641200 | 0.40661700  |
| C | -2.70193500 | -0.30375000 | 0.19498800  |
| C | -3.55085900 | 0.57327800  | 0.87071000  |
| C | -4.42520600 | 0.01499600  | 1.80262200  |
| H | -5.10266200 | 0.67589700  | 2.33706300  |
| C | -1.76723200 | -2.54808800 | -0.36945200 |
| C | -0.40036300 | -2.27664800 | -0.28506800 |
| C | 0.57787400  | -3.08645700 | -0.86840500 |
| C | 0.13171600  | -4.18331800 | -1.60322500 |
| H | 0.86792800  | -4.84032100 | -2.05959800 |
| O | -1.80675800 | 0.23301200  | -0.73085300 |
| O | 0.01356900  | -1.13682600 | 0.40044900  |
| P | -0.23833400 | 0.30470200  | -0.32463500 |
| O | 0.37536900  | 0.25093900  | -1.77109100 |
| O | 0.19863200  | 1.37206900  | 0.60445000  |
| C | -4.42369100 | -1.35206300 | 2.09974900  |
| C | -5.39454500 | -1.86865600 | 3.14689300  |
| C | -3.54247400 | -2.21263600 | 1.42052800  |
| C | -4.96988800 | -3.20295100 | 3.76434400  |
| H | -6.38105400 | -1.99605300 | 2.67568300  |
| H | -5.52949600 | -1.10846100 | 3.92535100  |
| C | -3.38976800 | -3.65907800 | 1.86451600  |
| C | -4.58687100 | -4.18695100 | 2.65821800  |
| H | -5.78049800 | -3.60267600 | 4.38445300  |
| H | -4.10637600 | -3.04789700 | 4.42580100  |
| H | -3.18155200 | -4.31353300 | 1.01643400  |
| H | -2.49017300 | -3.71268200 | 2.49694800  |
| H | -4.34484900 | -5.17164000 | 3.07460800  |

|   |             |             |             |
|---|-------------|-------------|-------------|
| H | -5.44411400 | -4.32809500 | 1.98447200  |
| C | -2.19454800 | -3.60983600 | -1.19845400 |
| C | -3.66904700 | -3.77489400 | -1.52696500 |
| C | -1.23167200 | -4.43860200 | -1.80191600 |
| C | -4.02121800 | -5.16463700 | -2.06144100 |
| H | -3.91967500 | -3.02478700 | -2.29258400 |
| H | -4.29246900 | -3.52487700 | -0.66607200 |
| C | -1.62945400 | -5.63731900 | -2.64567700 |
| C | -3.05974500 | -5.55668400 | -3.18461400 |
| H | -5.05927700 | -5.17183200 | -2.41325200 |
| H | -3.95447000 | -5.90277400 | -1.24927900 |
| H | -0.91491300 | -5.75701300 | -3.46883200 |
| H | -1.53374000 | -6.54470900 | -2.03020400 |
| H | -3.34452600 | -6.51656800 | -3.63053900 |
| H | -3.11337400 | -4.80380000 | -3.98290200 |
| C | 2.01689800  | -2.75357300 | -0.66815700 |
| C | 2.60399300  | -2.98070200 | 0.59663900  |
| C | 2.76744100  | -2.16461600 | -1.70617300 |
| C | 3.96827600  | -2.57691100 | 0.83356200  |
| C | 4.12784000  | -1.74913100 | -1.45038700 |
| C | 4.68706600  | -1.95128600 | -0.18792800 |
| C | -3.51106900 | 2.04168600  | 0.61554700  |
| C | -4.16312900 | 2.56852700  | -0.51837000 |
| C | -2.83283900 | 2.89047900  | 1.51406500  |
| C | -4.16038100 | 3.99451600  | -0.74048300 |
| C | -2.85343600 | 4.31683600  | 1.29395500  |
| C | -3.52114500 | 4.82936400  | 0.17950100  |
| C | 1.89526700  | -3.60763500 | 1.66772200  |
| C | 4.55564800  | -2.82085500 | 2.11078900  |
| C | 2.49724200  | -3.83068800 | 2.87818100  |
| C | 3.84450900  | -3.43450400 | 3.10520300  |
| H | 5.57270400  | -2.48249900 | 2.28015800  |
| H | 4.29998700  | -3.60839000 | 4.07573700  |
| H | 1.94106500  | -4.31455400 | 3.67638700  |
| H | 0.86879800  | -3.91586300 | 1.50469400  |
| H | 5.69996500  | -1.61135000 | 0.00870200  |
| C | 2.22611800  | -1.93065900 | -3.01069100 |
| C | 2.97690800  | -1.35239700 | -3.99950300 |
| C | 4.87154400  | -1.12808600 | -2.50382400 |
| C | 4.32010400  | -0.94480200 | -3.74660100 |
| H | 5.89032200  | -0.81160900 | -2.29536100 |
| H | 4.89753000  | -0.47620600 | -4.53833800 |
| H | 2.54246200  | -1.17909300 | -4.97923000 |
| H | 1.19518800  | -2.20471700 | -3.19874700 |

|   |             |            |             |
|---|-------------|------------|-------------|
| C | -4.81890600 | 4.51669300 | -1.89543800 |
| C | -4.83818800 | 1.74090400 | -1.46871000 |
| C | -2.17759100 | 5.16980800 | 2.21891200  |
| C | -2.10192600 | 2.39250500 | 2.63738000  |
| C | -5.44630800 | 3.68758600 | -2.78551100 |
| C | -5.45559000 | 2.28066100 | -2.56571200 |
| C | -1.49768700 | 4.65139500 | 3.28744000  |
| C | -1.45423600 | 3.24281600 | 3.49212800  |
| H | -4.80809200 | 5.59268000 | -2.05119200 |
| H | -5.94101600 | 4.09730000 | -3.66159500 |
| H | -5.95789900 | 1.63236200 | -3.27822600 |
| H | -4.85032900 | 0.66836500 | -1.30896800 |
| H | -2.20913200 | 6.24307300 | 2.04730600  |
| H | -0.98219800 | 5.31027700 | 3.98070700  |
| H | -0.89145400 | 2.84236900 | 4.33028300  |
| H | -2.04935100 | 1.32111800 | 2.79000400  |
| H | -3.53586700 | 5.90530600 | 0.01807000  |

### TS3

|   |             |             |             |
|---|-------------|-------------|-------------|
| C | -4.75078200 | -1.66269900 | 2.00732200  |
| C | -3.34905700 | -1.51535300 | 2.24869000  |
| C | -2.85259500 | -1.04546500 | 3.47509600  |
| C | -3.77717000 | -0.75208600 | 4.46045200  |
| C | -5.17234000 | -0.90935600 | 4.24966500  |
| C | -5.66525600 | -1.35598000 | 3.03894000  |
| C | -4.89688400 | -2.10401100 | 0.66377000  |
| C | -3.59772700 | -2.24819900 | 0.14861500  |
| H | -1.78606200 | -0.91439400 | 3.62461400  |
| H | -3.42985900 | -0.38503800 | 5.42213700  |
| H | -5.85791800 | -0.66779800 | 5.05674000  |
| H | -6.73423500 | -1.46985400 | 2.88071300  |
| N | -2.67537800 | -1.89778800 | 1.13050600  |
| H | -1.66093300 | -1.73090600 | 0.96623200  |
| C | -6.19090700 | -2.35775900 | -0.03934000 |
| H | -6.05724900 | -2.50637300 | -1.11500100 |
| H | -6.69982900 | -3.24684000 | 0.35509400  |
| H | -6.87334700 | -1.51002500 | 0.09482100  |
| C | -3.22637700 | -2.50963900 | -1.20040300 |
| H | -4.06849500 | -2.64788600 | -1.87060200 |
| O | -3.06982300 | -0.61055200 | -1.73404800 |
| H | -2.05479500 | -0.40227300 | -1.69239800 |
| C | -1.96052700 | -3.12268100 | -1.60863200 |
| C | -1.18392400 | -3.80273900 | -0.65117900 |
| C | -1.51596400 | -3.08299800 | -2.95636100 |

|   |             |             |             |
|---|-------------|-------------|-------------|
| C | 0.02311300  | -4.39691400 | -0.99021200 |
| H | -1.53431700 | -3.86903400 | 0.36970900  |
| C | -0.29390600 | -3.67621100 | -3.26981800 |
| C | 0.48254200  | -4.31361700 | -2.30159700 |
| H | 0.61036800  | -4.89025500 | -0.22592000 |
| H | 0.06676300  | -3.61934900 | -4.29330200 |
| H | 1.44621400  | -4.73409200 | -2.57065400 |
| C | -2.25900800 | -2.35288300 | -4.04575700 |
| H | -1.99329400 | -2.75966000 | -5.02577400 |
| H | -3.34788900 | -2.42110000 | -3.94458900 |
| H | -1.98367500 | -1.29150100 | -4.04725300 |
| H | -3.36135600 | -0.37841200 | -2.63331800 |
| C | 2.61517200  | 1.67739500  | 0.57197600  |
| C | 2.62094700  | 0.33035600  | 0.18474100  |
| C | 3.48078700  | -0.60974000 | 0.75888900  |
| C | 4.34773700  | -0.15965500 | 1.75529800  |
| H | 5.03086100  | -0.87292000 | 2.20995700  |
| C | 1.66451600  | 2.61272500  | -0.10195400 |
| C | 0.30053400  | 2.30018600  | -0.06523400 |
| C | -0.67904600 | 3.13750200  | -0.61063900 |
| C | -0.24094000 | 4.31485700  | -1.21909000 |
| H | -0.98183300 | 4.98935100  | -1.64150900 |
| O | 1.73635700  | -0.09068600 | -0.79157500 |
| O | -0.08592900 | 1.11208300  | 0.52034000  |
| P | 0.15687300  | -0.27623100 | -0.35546000 |
| O | -0.59308200 | -0.21665700 | -1.66584700 |
| O | -0.04633500 | -1.38294600 | 0.63637100  |
| C | 4.33126400  | 1.16024600  | 2.21652400  |
| C | 5.29616500  | 1.55749400  | 3.32000400  |
| C | 3.43911400  | 2.08543700  | 1.64475600  |
| C | 4.85826300  | 2.80488900  | 4.09105500  |
| H | 6.28308400  | 1.74921400  | 2.87171700  |
| H | 5.43682100  | 0.71180600  | 4.00382800  |
| C | 3.26478300  | 3.46288600  | 2.26473900  |
| C | 4.45888200  | 3.90887000  | 3.11091800  |
| H | 5.66607800  | 3.13798300  | 4.75326900  |
| H | 3.99856500  | 2.56256800  | 4.73121600  |
| H | 3.03763500  | 4.21264800  | 1.50502200  |
| H | 2.36976700  | 3.42184100  | 2.90466400  |
| H | 4.20814400  | 4.83425900  | 3.64276300  |
| H | 5.31128000  | 4.13905900  | 2.45553600  |
| C | 2.08546700  | 3.76166500  | -0.80629900 |
| C | 3.56163700  | 3.98851400  | -1.08861700 |
| C | 1.11685600  | 4.62922600  | -1.34332400 |



|   |             |             |             |
|---|-------------|-------------|-------------|
| C | 3.89439600  | 5.43208800  | -1.47150400 |
| H | 3.84130400  | 3.32546700  | -1.92171600 |
| H | 4.17670500  | 3.66434400  | -0.24680600 |
| C | 1.50370700  | 5.92076800  | -2.04293300 |
| C | 2.94286900  | 5.92281900  | -2.56400500 |
| H | 4.93774900  | 5.49502400  | -1.80223700 |
| H | 3.80004100  | 6.08070800  | -0.58863800 |
| H | 0.79896900  | 6.11930500  | -2.85946000 |
| H | 1.38493300  | 6.75445200  | -1.33393100 |
| H | 3.21626700  | 6.92916100  | -2.90247200 |
| H | 3.02281100  | 5.25885100  | -3.43594600 |
| C | -2.11768200 | 2.75390800  | -0.57271400 |
| C | -2.79645700 | 2.65805900  | 0.66282200  |
| C | -2.79146600 | 2.44573300  | -1.77558600 |
| C | -4.18467000 | 2.26316900  | 0.68798100  |
| C | -4.19436400 | 2.10467000  | -1.74097400 |
| C | -4.85382000 | 2.02730000  | -0.51431800 |
| C | 3.45754800  | -2.04245700 | 0.34913000  |
| C | 3.98754200  | -2.42991800 | -0.90012500 |
| C | 2.92844900  | -3.00984700 | 1.22967000  |
| C | 4.03259400  | -3.82897800 | -1.25261900 |
| C | 3.00608500  | -4.40866900 | 0.88137700  |
| C | 3.56420700  | -4.78153500 | -0.34384900 |
| C | -2.15664400 | 2.92732100  | 1.91280400  |
| C | -4.84290900 | 2.11094300  | 1.94631800  |
| C | -2.82471500 | 2.77614400  | 3.09803700  |
| C | -4.18363200 | 2.35347700  | 3.11894500  |
| H | -5.87825200 | 1.78154300  | 1.95004600  |
| H | -4.68990700 | 2.21512500  | 4.06876600  |
| H | -2.31313900 | 2.97497600  | 4.03563200  |
| H | -1.12128400 | 3.24646000  | 1.90949800  |
| H | -5.90241900 | 1.73845400  | -0.49078200 |
| C | -2.11457900 | 2.36697500  | -3.03377800 |
| C | -2.77650300 | 2.00227200  | -4.17743700 |
| C | -4.85673300 | 1.76446200  | -2.96087100 |
| C | -4.17114500 | 1.70622500  | -4.14636100 |
| H | -5.91666000 | 1.52452200  | -2.92024400 |
| H | -4.68395800 | 1.43267500  | -5.06459600 |
| H | -2.23450800 | 1.92923000  | -5.11595200 |
| H | -1.04917600 | 2.55731700  | -3.06028200 |
| C | 4.56041100  | -4.20661300 | -2.52579400 |
| C | 4.49330600  | -1.48346400 | -1.84434500 |
| C | 2.47874500  | -5.37912800 | 1.78890700  |
| C | 2.28006800  | -2.65617900 | 2.45433000  |

|   |            |             |             |
|---|------------|-------------|-------------|
| C | 5.01739400 | -3.26473000 | -3.40748100 |
| C | 4.98471200 | -1.88480700 | -3.05792300 |
| C | 1.87803800 | -4.99647200 | 2.95783100  |
| C | 1.77037400 | -3.61514900 | 3.28765600  |
| H | 4.58997700 | -5.26427200 | -2.77734000 |
| H | 5.41224900 | -3.56482200 | -4.37417500 |
| H | 5.35400100 | -1.14607300 | -3.76360100 |
| H | 4.47247000 | -0.43109900 | -1.58619300 |
| H | 2.55621900 | -6.43027300 | 1.52106500  |
| H | 1.47308100 | -5.74350300 | 3.63501600  |
| H | 1.26619100 | -3.32304500 | 4.20444900  |
| H | 2.16926400 | -1.60665100 | 2.69586500  |
| H | 3.61863600 | -5.83676500 | -0.60433700 |

**Int4'**

|   |             |             |             |
|---|-------------|-------------|-------------|
| C | -3.98633400 | -2.88116000 | 1.63879200  |
| C | -2.68215200 | -2.44473200 | 2.06199700  |
| C | -2.50409100 | -1.63647800 | 3.19980100  |
| C | -3.63225000 | -1.32924000 | 3.92880500  |
| C | -4.93113800 | -1.79484000 | 3.55893000  |
| C | -5.12055900 | -2.54883400 | 2.42721800  |
| C | -3.81713000 | -3.54344600 | 0.41618000  |
| C | -2.40795500 | -3.53183800 | 0.13375300  |
| H | -1.51975200 | -1.26198400 | 3.45678600  |
| H | -3.53995600 | -0.69753600 | 4.80602300  |
| H | -5.77841000 | -1.52266800 | 4.18020800  |
| H | -6.11131600 | -2.88292800 | 2.13408800  |
| N | -1.75204700 | -2.89035900 | 1.18681400  |
| H | -0.82215700 | -2.40496900 | 1.11568700  |
| C | -4.87993600 | -4.05349500 | -0.49463800 |
| H | -4.91052800 | -3.40495800 | -1.37947300 |
| H | -4.68521300 | -5.07831300 | -0.82855100 |
| H | -5.85969000 | -4.03534000 | -0.01005600 |
| C | -1.84545700 | -3.94688700 | -1.05489700 |
| H | -2.57216800 | -4.26023700 | -1.79387200 |
| O | -3.17968900 | -1.76688400 | -2.17603300 |
| H | -2.36941500 | -1.39185100 | -1.75736100 |
| C | -0.48072200 | -3.90127200 | -1.47730100 |
| C | 0.58620600  | -3.89779000 | -0.54944700 |
| C | -0.19853300 | -3.80540400 | -2.87440800 |
| C | 1.89562000  | -3.76626800 | -0.97302400 |
| H | 0.37928300  | -4.01752600 | 0.50586700  |
| C | 1.12829400  | -3.65069500 | -3.26724500 |
| C | 2.16714800  | -3.62162200 | -2.33583400 |

|   |             |             |             |
|---|-------------|-------------|-------------|
| H | 2.69897100  | -3.76075800 | -0.24976800 |
| H | 1.35275300  | -3.53614900 | -4.32405100 |
| H | 3.19029000  | -3.48723200 | -2.67121600 |
| C | -1.29651700 | -3.78227200 | -3.90369900 |
| H | -0.87865800 | -3.65573500 | -4.90613700 |
| H | -1.87520100 | -4.71614900 | -3.90226800 |
| H | -1.99652200 | -2.96485400 | -3.69374400 |
| H | -3.47067400 | -1.05996200 | -2.77133100 |
| C | 1.94904900  | 2.30528600  | 0.25098100  |
| C | 2.31905100  | 0.96656600  | 0.04963000  |
| C | 3.47648600  | 0.43365200  | 0.62658000  |
| C | 4.24007100  | 1.27762600  | 1.43674200  |
| H | 5.14499200  | 0.87765400  | 1.88746000  |
| C | 0.71530500  | 2.81905200  | -0.41068300 |
| C | -0.49368100 | 2.16905500  | -0.13518500 |
| C | -1.71911100 | 2.65249600  | -0.60936400 |
| C | -1.68836300 | 3.80339500  | -1.40080700 |
| H | -2.62996500 | 4.20774900  | -1.76410500 |
| O | 1.51409600  | 0.16410800  | -0.73640200 |
| O | -0.46260600 | 1.02937700  | 0.63933300  |
| P | 0.08161500  | -0.37367300 | -0.08176100 |
| O | -0.79682900 | -0.76284800 | -1.22742300 |
| O | 0.35744100  | -1.30269800 | 1.07562200  |
| C | 3.86179800  | 2.59058400  | 1.72203600  |
| C | 4.73973000  | 3.42042200  | 2.64155800  |
| C | 2.69065900  | 3.11002100  | 1.14426600  |
| C | 3.99415500  | 4.58459800  | 3.29674300  |
| H | 5.58101800  | 3.82501200  | 2.05815300  |
| H | 5.18696100  | 2.77049800  | 3.40318900  |
| C | 2.15761800  | 4.46549300  | 1.58346700  |
| C | 3.21413100  | 5.36090500  | 2.23529500  |
| H | 4.70271400  | 5.23675100  | 3.82089800  |
| H | 3.29369700  | 4.19953500  | 4.05088300  |
| H | 1.67912100  | 4.99059400  | 0.75523000  |
| H | 1.35047700  | 4.27904000  | 2.30880400  |
| H | 2.72924000  | 6.24285400  | 2.67033800  |
| H | 3.91175800  | 5.72773200  | 1.46858400  |
| C | 0.72816400  | 3.91635000  | -1.29786000 |
| C | 2.04603100  | 4.46949600  | -1.81431100 |
| C | -0.49290700 | 4.42403200  | -1.77460700 |
| C | 1.92790500  | 5.87837000  | -2.39960000 |
| H | 2.40343800  | 3.78614500  | -2.59996400 |
| H | 2.81404900  | 4.44001700  | -1.03873100 |
| C | -0.55429000 | 5.65557500  | -2.66122600 |

|   |             |             |             |
|---|-------------|-------------|-------------|
| C | 0.76149100  | 5.94689900  | -3.38705300 |
| H | 2.87045400  | 6.15645500  | -2.88567500 |
| H | 1.76124200  | 6.60345800  | -1.58981700 |
| H | -1.37499500 | 5.54887900  | -3.38106100 |
| H | -0.81252600 | 6.52519400  | -2.03766900 |
| H | 0.71169700  | 6.92918200  | -3.87151500 |
| H | 0.91860800  | 5.20474300  | -4.18206500 |
| C | -3.00616500 | 1.97624100  | -0.29439700 |
| C | -3.47869900 | 1.93222400  | 1.03752000  |
| C | -3.78993600 | 1.44103400  | -1.34174400 |
| C | -4.76403200 | 1.34009700  | 1.32040800  |
| C | -5.07360400 | 0.84938100  | -1.04569000 |
| C | -5.52040800 | 0.80291100  | 0.27604900  |
| C | 3.94126500  | -0.96919300 | 0.43292600  |
| C | 4.55118000  | -1.35509700 | -0.77987300 |
| C | 3.89296800  | -1.86692500 | 1.52116400  |
| C | 5.20677000  | -2.63866300 | -0.87142500 |
| C | 4.56315700  | -3.14258800 | 1.42627000  |
| C | 5.22036400  | -3.48551100 | 0.24079900  |
| C | -2.74970100 | 2.49698800  | 2.13053300  |
| C | -5.25786900 | 1.35705800  | 2.66001600  |
| C | -3.25539900 | 2.48885400  | 3.40330900  |
| C | -4.53052200 | 1.91808600  | 3.67423000  |
| H | -6.23254200 | 0.91703600  | 2.85191500  |
| H | -4.92272100 | 1.93235900  | 4.68767200  |
| H | -2.68324300 | 2.93016400  | 4.21454500  |
| H | -1.78452200 | 2.94760600  | 1.93580100  |
| H | -6.49064100 | 0.36261300  | 0.49476300  |
| C | -3.36164100 | 1.45530300  | -2.70762200 |
| C | -4.16756300 | 0.98107100  | -3.71185200 |
| C | -5.87446100 | 0.35069800  | -2.11868000 |
| C | -5.44874100 | 0.42876900  | -3.41693900 |
| H | -6.84016500 | -0.08654500 | -1.87762000 |
| H | -6.07240600 | 0.05514400  | -4.22399400 |
| H | -3.82080200 | 1.00993500  | -4.74104200 |
| H | -2.37526900 | 1.83768300  | -2.93837600 |
| C | 5.82477600  | -3.01414500 | -2.10437800 |
| C | 4.55449000  | -0.51434000 | -1.93578500 |
| C | 4.52193900  | -4.03076500 | 2.54510000  |
| C | 3.17651500  | -1.56715300 | 2.72214100  |
| C | 5.78986900  | -2.18393600 | -3.19289600 |
| C | 5.14277800  | -0.91818600 | -3.10493900 |
| C | 3.84005900  | -3.69593600 | 3.68339500  |
| C | 3.14946900  | -2.45284100 | 3.76580800  |

|   |            |             |             |
|---|------------|-------------|-------------|
| H | 6.31734300 | -3.98191800 | -2.15905600 |
| H | 6.25739900 | -2.48478000 | -4.12635800 |
| H | 5.11875200 | -0.26883500 | -3.97538500 |
| H | 4.06441800 | 0.45025900  | -1.87715700 |
| H | 5.03817800 | -4.98431600 | 2.46549200  |
| H | 3.81113900 | -4.38270600 | 4.52492200  |
| H | 2.58417000 | -2.21479300 | 4.66234300  |
| H | 2.61892500 | -0.64075100 | 2.77196500  |
| H | 5.73131900 | -4.44355100 | 0.17352700  |

**Int4**

|   |             |             |             |
|---|-------------|-------------|-------------|
| C | -4.58407800 | -2.32497800 | 1.15312100  |
| C | -3.27065700 | -2.07040400 | 1.68940100  |
| C | -3.08717100 | -1.45239900 | 2.94102000  |
| C | -4.22185700 | -1.15555100 | 3.66327300  |
| C | -5.53355700 | -1.45221800 | 3.17880800  |
| C | -5.72546200 | -2.01825800 | 1.94240400  |
| C | -4.40644800 | -2.82003700 | -0.14441600 |
| C | -2.98702500 | -2.88986900 | -0.36345200 |
| H | -2.08954600 | -1.21295000 | 3.29190200  |
| H | -4.12374300 | -0.66822500 | 4.62800200  |
| H | -6.38776200 | -1.20306800 | 3.80070700  |
| H | -6.72444500 | -2.22369800 | 1.56926200  |
| N | -2.33970800 | -2.47729500 | 0.80157300  |
| H | -1.33189600 | -2.15621900 | 0.85570600  |
| C | -5.46560900 | -3.25314000 | -1.10208000 |
| H | -5.23562300 | -2.93543000 | -2.12355400 |
| H | -5.57876800 | -4.34504700 | -1.10596300 |
| H | -6.43210100 | -2.81965700 | -0.83155200 |
| C | -2.36042600 | -3.20180800 | -1.55219000 |
| H | -3.02512100 | -3.25264900 | -2.40970000 |
| C | -0.96665500 | -3.38964800 | -1.79860600 |
| C | -0.10120300 | -3.86728500 | -0.78727000 |
| C | -0.43410100 | -3.04470700 | -3.07673800 |
| C | 1.25686300  | -3.99738200 | -1.01873000 |
| H | -0.51289200 | -4.14574900 | 0.17498100  |
| C | 0.93470700  | -3.17664200 | -3.27688500 |
| C | 1.77770800  | -3.64062200 | -2.26482000 |
| H | 1.91357000  | -4.34373400 | -0.23007500 |
| H | 1.35973200  | -2.87783000 | -4.23086700 |
| H | 2.84388700  | -3.71615600 | -2.44739600 |
| C | -1.29408900 | -2.40502600 | -4.12973600 |
| H | -0.72926900 | -2.25810200 | -5.05436700 |
| H | -2.18349100 | -3.00054300 | -4.37360900 |

|   |             |             |             |
|---|-------------|-------------|-------------|
| H | -1.63295100 | -1.42880200 | -3.76662800 |
| C | 2.19644500  | 2.08472700  | 0.25046800  |
| C | 2.42833500  | 0.70592700  | 0.11505900  |
| C | 3.49656200  | 0.07445100  | 0.75910800  |
| C | 4.33444100  | 0.86169900  | 1.55052100  |
| H | 5.17242400  | 0.38393000  | 2.05241100  |
| C | 1.01585600  | 2.68436800  | -0.43991400 |
| C | -0.24141000 | 2.14707700  | -0.14366000 |
| C | -1.42552400 | 2.67225000  | -0.67026600 |
| C | -1.31160300 | 3.76124600  | -1.53449300 |
| H | -2.21775700 | 4.19522900  | -1.95072800 |
| O | 1.59047400  | -0.04848400 | -0.67519300 |
| O | -0.30127100 | 1.02838200  | 0.65819800  |
| P | 0.04864300  | -0.39535200 | -0.14533600 |
| O | -0.80286600 | -0.55488600 | -1.35785800 |
| O | 0.08428400  | -1.43128500 | 0.95617900  |
| C | 4.10390100  | 2.22443500  | 1.75446100  |
| C | 5.05369500  | 2.99967600  | 2.65061600  |
| C | 3.00775900  | 2.84122800  | 1.12434400  |
| C | 4.43585200  | 4.27565100  | 3.22651200  |
| H | 5.94639100  | 3.27363200  | 2.06747800  |
| H | 5.41042100  | 2.34660400  | 3.45625200  |
| C | 2.61879400  | 4.26513700  | 1.49209100  |
| C | 3.76187600  | 5.07360500  | 2.10967500  |
| H | 5.20674400  | 4.87222000  | 3.72858400  |
| H | 3.68625100  | 4.01446300  | 3.98633100  |
| H | 2.20200700  | 4.79610400  | 0.63477500  |
| H | 1.79407300  | 4.20153300  | 2.21895400  |
| H | 3.37570600  | 6.02824300  | 2.48622300  |
| H | 4.50549000  | 5.31342600  | 1.33603000  |
| C | 1.11101900  | 3.72633300  | -1.38640000 |
| C | 2.46948300  | 4.15267900  | -1.91758100 |
| C | -0.06858300 | 4.28025500  | -1.91614400 |
| C | 2.45605200  | 5.52619200  | -2.59136400 |
| H | 2.78586200  | 3.39793100  | -2.65388200 |
| H | 3.22576300  | 4.11836000  | -1.13039600 |
| C | -0.03330100 | 5.45423100  | -2.87939000 |
| C | 1.30846000  | 5.60954900  | -3.59953800 |
| H | 3.42088400  | 5.70840000  | -3.07929400 |
| H | 2.33000400  | 6.31088300  | -1.83137500 |
| H | -0.84962800 | 5.35710300  | -3.60557800 |
| H | -0.23988100 | 6.37800400  | -2.31726600 |
| H | 1.33171100  | 6.55991800  | -4.14591600 |
| H | 1.42445900  | 4.80907300  | -4.34342600 |

|   |             |             |             |
|---|-------------|-------------|-------------|
| C | -2.74223000 | 2.06815900  | -0.32161700 |
| C | -3.26019300 | 2.22111400  | 0.98406200  |
| C | -3.47226800 | 1.34864600  | -1.29334300 |
| C | -4.55855800 | 1.68055700  | 1.30693400  |
| C | -4.77031200 | 0.81284300  | -0.95895700 |
| C | -5.28273900 | 0.99933700  | 0.32624400  |
| C | 3.74037900  | -1.39300200 | 0.65190300  |
| C | 4.37323000  | -1.92508200 | -0.49079500 |
| C | 3.40453700  | -2.23256300 | 1.73451600  |
| C | 4.75115500  | -3.31826800 | -0.51467700 |
| C | 3.78334300  | -3.62570900 | 1.70231800  |
| C | 4.46392500  | -4.12683900 | 0.58873600  |
| C | -2.54776300 | 2.90968100  | 2.01519500  |
| C | -5.07990000 | 1.86420300  | 2.62339400  |
| C | -3.07377900 | 3.04878400  | 3.27239400  |
| C | -4.35963000 | 2.52337400  | 3.58293900  |
| H | -6.06464100 | 1.46279700  | 2.84513800  |
| H | -4.76740800 | 2.65467000  | 4.58169200  |
| H | -2.50971300 | 3.57117900  | 4.03994900  |
| H | -1.57280700 | 3.32275300  | 1.78514700  |
| H | -6.26256300 | 0.59881500  | 0.57300900  |
| C | -2.96329100 | 1.10499300  | -2.60698500 |
| C | -3.69896900 | 0.41542300  | -3.53500600 |
| C | -5.50364400 | 0.09826700  | -1.95511700 |
| C | -4.98949800 | -0.09138300 | -3.20971700 |
| H | -6.48700600 | -0.28440300 | -1.69276200 |
| H | -5.56254300 | -0.62745700 | -3.96214000 |
| H | -3.29384700 | 0.24616300  | -4.52859000 |
| H | -1.96611600 | 1.45016100  | -2.84461200 |
| C | 5.40305800  | -3.83842200 | -1.67556200 |
| C | 4.65825800  | -1.13004200 | -1.64388200 |
| C | 3.44517200  | -4.46082000 | 2.81151800  |
| C | 2.67708800  | -1.75648100 | 2.86984200  |
| C | 5.64928100  | -3.04274200 | -2.76288500 |
| C | 5.26579900  | -1.67089700 | -2.74612400 |
| C | 2.75922300  | -3.96017200 | 3.88463800  |
| C | 2.36504100  | -2.59184700 | 3.90824900  |
| H | 5.68990600  | -4.88729300 | -1.67842700 |
| H | 6.13867300  | -3.45306000 | -3.64191900 |
| H | 5.46078200  | -1.05096000 | -3.61658800 |
| H | 4.36895600  | -0.08548800 | -1.63565000 |
| H | 3.74240900  | -5.50627300 | 2.77914200  |
| H | 2.50456300  | -4.60650800 | 4.72023400  |
| H | 1.79862400  | -2.21393800 | 4.75461500  |

|   |            |             |            |
|---|------------|-------------|------------|
| H | 2.34949900 | -0.72459900 | 2.87856300 |
| H | 4.76147000 | -5.17335900 | 0.57305600 |

**Int5**

|   |             |             |             |
|---|-------------|-------------|-------------|
| C | -4.16246200 | -0.47166700 | 0.35882300  |
| C | -3.46431900 | 0.72971600  | 0.18427800  |
| C | -3.81363000 | 1.90948400  | 0.85040100  |
| C | -4.91497300 | 1.85664100  | 1.70483800  |
| H | -5.21601000 | 2.76268500  | 2.22538000  |
| C | -3.70879700 | -1.66267000 | -0.42228300 |
| C | -2.37211400 | -2.06798100 | -0.29802600 |
| C | -1.84649500 | -3.15092800 | -1.00971500 |
| C | -2.72062200 | -3.84580500 | -1.84673700 |
| H | -2.33891000 | -4.70011700 | -2.40042900 |
| O | -2.36659300 | 0.73970000  | -0.65492800 |
| O | -1.53806600 | -1.34687300 | 0.53915700  |
| P | -0.96771900 | 0.09193500  | -0.04670200 |
| O | -0.08312800 | -0.10147100 | -1.23918900 |
| O | -0.49950900 | 0.85694000  | 1.16189800  |
| C | -5.60628800 | 0.66490300  | 1.95197300  |
| C | -6.78335800 | 0.69213600  | 2.91176600  |
| C | -5.21139900 | -0.51962200 | 1.30246500  |
| C | -7.12112600 | -0.67967500 | 3.50085400  |
| H | -7.66604900 | 1.07132500  | 2.37434800  |
| H | -6.58669400 | 1.41610200  | 3.71192200  |
| C | -5.81452100 | -1.85452500 | 1.70833200  |
| C | -7.17993900 | -1.72595500 | 2.38640100  |
| H | -8.07136100 | -0.62875900 | 4.04538900  |
| H | -6.35035200 | -0.97137600 | 4.22770400  |
| H | -5.87315400 | -2.53479700 | 0.85653800  |
| H | -5.11235500 | -2.33126500 | 2.40959500  |
| H | -7.48980600 | -2.70115700 | 2.78004800  |
| H | -7.93540600 | -1.42654500 | 1.64572400  |
| C | -4.54453600 | -2.32748800 | -1.34580700 |
| C | -5.90967600 | -1.75729100 | -1.69645700 |
| C | -4.04887300 | -3.45009000 | -2.03369100 |
| C | -6.84385700 | -2.77404000 | -2.35614700 |
| H | -5.74606000 | -0.92022800 | -2.39271600 |
| H | -6.38815300 | -1.31145200 | -0.82259900 |
| C | -4.92363600 | -4.26044800 | -2.97423200 |
| C | -6.12886700 | -3.48222600 | -3.50793600 |
| H | -7.75001800 | -2.26753200 | -2.70891700 |
| H | -7.16362400 | -3.51906100 | -1.61342400 |
| H | -4.31451100 | -4.64188000 | -3.80252000 |



|   |             |             |             |
|---|-------------|-------------|-------------|
| H | -5.28874800 | -5.14833700 | -2.43561900 |
| H | -6.80865700 | -4.16133700 | -4.03593500 |
| H | -5.79323600 | -2.73294700 | -4.23825900 |
| C | -0.40407500 | -3.52154500 | -0.91520200 |
| C | 0.08400100  | -4.17029200 | 0.23987100  |
| C | 0.46569000  | -3.22462800 | -1.98766200 |
| C | 1.46884200  | -4.57251000 | 0.30099900  |
| C | 1.85385700  | -3.61435100 | -1.90795500 |
| C | 2.31216600  | -4.29344100 | -0.77746000 |
| C | -2.97623100 | 3.13099100  | 0.68100100  |
| C | -2.97225000 | 3.81927200  | -0.55265600 |
| C | -2.13205300 | 3.55131500  | 1.73211300  |
| C | -2.10633100 | 4.95932500  | -0.73317200 |
| C | -1.26531400 | 4.69007300  | 1.53819400  |
| C | -1.27806900 | 5.36504400  | 0.31585600  |
| C | -0.74555800 | -4.45006600 | 1.36978600  |
| C | 1.94895700  | -5.22645500 | 1.47681900  |
| C | -0.24329500 | -5.06545300 | 2.48603300  |
| C | 1.12335600  | -5.46020000 | 2.54385000  |
| H | 2.99115200  | -5.53701700 | 1.50302000  |
| H | 1.50382700  | -5.95326400 | 3.43422900  |
| H | -0.89185400 | -5.25850700 | 3.33603700  |
| H | -1.78841000 | -4.15642700 | 1.33201000  |
| H | 3.35967800  | -4.58142300 | -0.72257200 |
| C | 0.03922800  | -2.50475700 | -3.14812900 |
| C | 0.91813600  | -2.19505300 | -4.15019800 |
| C | 2.73874400  | -3.26565500 | -2.97436400 |
| C | 2.28815800  | -2.57359200 | -4.06414500 |
| H | 3.78602400  | -3.54123600 | -2.88409600 |
| H | 2.97434300  | -2.28440900 | -4.85417700 |
| H | 0.58006900  | -1.62337300 | -5.00905500 |
| H | -0.98994300 | -2.17356900 | -3.20335600 |
| C | -2.09008800 | 5.62616900  | -1.99679900 |
| C | -3.79014100 | 3.41809700  | -1.65456800 |
| C | -0.39271500 | 5.08970300  | 2.59754500  |
| C | -2.06569500 | 2.86723800  | 2.98713100  |
| C | -2.87970300 | 5.19860800  | -3.03034100 |
| C | -3.74334100 | 4.08020900  | -2.85234500 |
| C | -0.37485800 | 4.41648800  | 3.78796400  |
| C | -1.22786200 | 3.29223300  | 3.98282700  |
| H | -1.42866700 | 6.48043900  | -2.11827900 |
| H | -2.85610700 | 5.71234300  | -3.98743800 |
| H | -4.36885100 | 3.75161500  | -3.67736600 |
| H | -4.44895600 | 2.56684500  | -1.52755400 |

|   |             |             |             |
|---|-------------|-------------|-------------|
| H | 0.25849800  | 5.94417500  | 2.43103300  |
| H | 0.29250000  | 4.72893900  | 4.58627000  |
| H | -1.19327100 | 2.75745700  | 4.92742000  |
| H | -2.68130100 | 1.98801500  | 3.12962400  |
| H | -0.61290000 | 6.21299600  | 0.16951800  |
| C | 3.15274500  | 3.14678800  | -0.85980200 |
| C | 1.79459100  | 2.80422000  | -0.53296700 |
| C | 0.72538000  | 3.13685800  | -1.38050300 |
| C | 1.03770900  | 3.82650900  | -2.53405200 |
| C | 2.37703700  | 4.18086800  | -2.87975200 |
| C | 3.43033700  | 3.84332900  | -2.06685100 |
| C | 3.95979100  | 2.66287500  | 0.17380200  |
| C | 3.07698800  | 2.03580800  | 1.13628800  |
| H | -0.29185000 | 2.86240800  | -1.13701700 |
| H | 0.23067900  | 4.10758900  | -3.20362300 |
| H | 2.55700800  | 4.69838300  | -3.81578000 |
| H | 4.45192700  | 4.08778300  | -2.33812900 |
| N | 1.77317500  | 2.16587000  | 0.66316200  |
| H | 0.93094700  | 1.62434400  | 0.96181600  |
| C | 5.43333000  | 2.86809500  | 0.29100400  |
| H | 5.92750300  | 2.58129800  | -0.64320600 |
| H | 5.66370300  | 3.92578400  | 0.47370200  |
| H | 5.87818900  | 2.29003900  | 1.10355200  |
| C | 3.48995500  | 1.40532700  | 2.28960200  |
| H | 4.56734400  | 1.34526400  | 2.38625800  |
| C | 2.74097200  | 0.77848900  | 3.34574400  |
| C | 1.34644200  | 0.95710100  | 3.48693900  |
| C | 3.42664900  | -0.07593100 | 4.26432900  |
| C | 0.62654800  | 0.25161200  | 4.43805600  |
| H | 0.81141500  | 1.65081800  | 2.86006600  |
| C | 2.67672200  | -0.76804900 | 5.21261400  |
| C | 1.28923900  | -0.62711500 | 5.29442300  |
| H | -0.44800400 | 0.38484200  | 4.49226700  |
| H | 3.18902600  | -1.43618600 | 5.89933200  |
| H | 0.73320100  | -1.19537500 | 6.03478100  |
| C | 4.92127100  | -0.27197000 | 4.22425500  |
| H | 5.45968100  | 0.67990600  | 4.31259700  |
| H | 5.24241800  | -0.90759900 | 5.05353500  |
| H | 5.24735300  | -0.74808700 | 3.29707500  |
| C | 2.82627700  | 0.54305100  | -2.96641500 |
| C | 4.24374200  | 0.55368100  | -3.13562000 |
| C | 4.78068100  | 1.13123100  | -4.30494400 |
| C | 3.91310800  | 1.64873500  | -5.25551400 |
| C | 2.51079400  | 1.59761400  | -5.07387900 |

|   |            |             |             |
|---|------------|-------------|-------------|
| C | 1.94890300 | 1.04199700  | -3.93207500 |
| C | 3.72058400 | -0.44299500 | -1.15368100 |
| C | 4.78817000 | -0.08664300 | -1.98430100 |
| H | 5.85600000 | 1.15914000  | -4.46286900 |
| H | 4.31337300 | 2.09191600  | -6.16335600 |
| H | 1.86151400 | 1.99932500  | -5.84716900 |
| H | 0.87779500 | 0.99374500  | -3.77285600 |
| H | 5.82906900 | -0.30849000 | -1.80665000 |
| N | 2.55131500 | -0.04581700 | -1.76286700 |
| H | 1.58574700 | -0.17664400 | -1.42877900 |
| C | 3.70161500 | -1.14287100 | 0.13038600  |
| C | 4.98720400 | -1.55261400 | 0.75724600  |
| C | 5.07578900 | -2.79605600 | 1.40594600  |
| C | 6.11934800 | -0.72207600 | 0.77254300  |
| C | 6.24483700 | -3.18681300 | 2.05563200  |
| H | 4.21530700 | -3.45580900 | 1.39463400  |
| C | 7.29167000 | -1.11374700 | 1.41815500  |
| H | 6.07356000 | 0.24324100  | 0.28708800  |
| C | 7.36067600 | -2.34794100 | 2.06540400  |
| H | 6.28609500 | -4.15377000 | 2.54973300  |
| H | 8.15072400 | -0.44798800 | 1.42078200  |
| H | 8.27354500 | -2.65384100 | 2.56831500  |
| C | 2.54183500 | -1.43530100 | 0.75497700  |
| H | 1.57406400 | -1.21447500 | 0.32521700  |
| H | 2.53266500 | -1.92007600 | 1.72366300  |

#### TS4

|   |             |             |             |
|---|-------------|-------------|-------------|
| C | -4.10986800 | -0.82572000 | 0.51526300  |
| C | -3.53802200 | 0.41364000  | 0.19997100  |
| C | -4.04741400 | 1.62117800  | 0.68772100  |
| C | -5.16231500 | 1.55341600  | 1.52291700  |
| H | -5.58281500 | 2.47993600  | 1.90640600  |
| C | -3.51427600 | -2.04942600 | -0.10090500 |
| C | -2.14834400 | -2.29135400 | 0.09675100  |
| C | -1.49025800 | -3.38582900 | -0.47216800 |
| C | -2.26129300 | -4.26675400 | -1.23316800 |
| H | -1.77462700 | -5.13219400 | -1.67602700 |
| O | -2.41577000 | 0.44358600  | -0.60820000 |
| O | -1.42216700 | -1.38857500 | 0.85155400  |
| P | -0.97783100 | 0.01623900  | 0.09620900  |
| O | -0.04835900 | -0.24774600 | -1.05264100 |
| O | -0.59207600 | 0.95749600  | 1.20228300  |
| C | -5.72190600 | 0.33326400  | 1.91875400  |
| C | -6.92275300 | 0.35014500  | 2.84851900  |

|   |             |             |             |
|---|-------------|-------------|-------------|
| C | -5.17853200 | -0.87139100 | 1.43660400  |
| C | -7.12673500 | -0.96558400 | 3.60354400  |
| H | -7.82499600 | 0.55796400  | 2.25307200  |
| H | -6.82927300 | 1.18639900  | 3.55195500  |
| C | -5.64678000 | -2.20404800 | 1.99833500  |
| C | -7.03815100 | -2.14373700 | 2.63191700  |
| H | -8.09280100 | -0.95326600 | 4.12183700  |
| H | -6.35091500 | -1.07548200 | 4.37395800  |
| H | -5.60617900 | -2.98696600 | 1.23844000  |
| H | -4.91938300 | -2.51009300 | 2.76588900  |
| H | -7.25269900 | -3.09017200 | 3.14209000  |
| H | -7.79868600 | -2.02528500 | 1.84666300  |
| C | -4.24723200 | -2.90330400 | -0.95296800 |
| C | -5.64937500 | -2.52034000 | -1.39958200 |
| C | -3.61694900 | -4.04097000 | -1.49049200 |
| C | -6.44869100 | -3.68765400 | -1.98327100 |
| H | -5.54395800 | -1.73965900 | -2.16878700 |
| H | -6.20701500 | -2.04731000 | -0.58926200 |
| C | -4.37317000 | -5.03893500 | -2.34944400 |
| C | -5.61318100 | -4.44207400 | -3.01862000 |
| H | -7.37786400 | -3.31117600 | -2.42705200 |
| H | -6.73774800 | -4.37785700 | -1.17758000 |
| H | -3.69559900 | -5.46216000 | -3.10066100 |
| H | -4.68731200 | -5.88323700 | -1.71668800 |
| H | -6.19990900 | -5.23548200 | -3.49641400 |
| H | -5.30694600 | -3.74645500 | -3.81218500 |
| C | -0.01788500 | -3.57214400 | -0.33126800 |
| C | 0.54034200  | -3.94699800 | 0.91074500  |
| C | 0.81382100  | -3.38684000 | -1.45841600 |
| C | 1.96025700  | -4.18848800 | 1.01208300  |
| C | 2.23263100  | -3.62920600 | -1.34534100 |
| C | 2.76647800  | -4.03177500 | -0.11950500 |
| C | -3.38426200 | 2.91024300  | 0.34189600  |
| C | -3.50630200 | 3.43328900  | -0.96425300 |
| C | -2.61090200 | 3.58439600  | 1.31076500  |
| C | -2.84388200 | 4.66991600  | -1.30251200 |
| C | -1.94372300 | 4.81595100  | 0.95817400  |
| C | -2.08160300 | 5.32747500  | -0.33392200 |
| C | -0.25401100 | -4.11316700 | 2.08720500  |
| C | 2.50444200  | -4.59172300 | 2.27048200  |
| C | 0.30973500  | -4.47790000 | 3.28122900  |
| C | 1.70822400  | -4.72407000 | 3.37669500  |
| H | 3.56906000  | -4.80723900 | 2.32580400  |
| H | 2.13708700  | -5.02781700 | 4.32761100  |

|   |             |             |             |
|---|-------------|-------------|-------------|
| H | -0.31395500 | -4.58720600 | 4.16373600  |
| H | -1.32128800 | -3.93775500 | 2.02086900  |
| H | 3.83499800  | -4.21980800 | -0.04366000 |
| C | 0.31159500  | -2.92698100 | -2.71682500 |
| C | 1.14393000  | -2.74959900 | -3.78882500 |
| C | 3.06519800  | -3.43444400 | -2.49025700 |
| C | 2.53902400  | -3.01089300 | -3.67909100 |
| H | 4.13224000  | -3.61163700 | -2.38577000 |
| H | 3.18421300  | -2.84057400 | -4.53569700 |
| H | 0.74651700  | -2.37386600 | -4.72643000 |
| H | -0.74068300 | -2.68713600 | -2.79884500 |
| C | -2.95999900 | 5.17740400  | -2.63307500 |
| C | -4.26268000 | 2.77621200  | -1.98431700 |
| C | -1.14456700 | 5.47966900  | 1.93978200  |
| C | -2.43814300 | 3.08466700  | 2.63984500  |
| C | -3.68601900 | 4.50963600  | -3.58259800 |
| C | -4.34741500 | 3.29312500  | -3.24965100 |
| C | -1.01901900 | 4.97420300  | 3.20433700  |
| C | -1.68284700 | 3.76438300  | 3.55663700  |
| H | -2.45072300 | 6.10713700  | -2.87415600 |
| H | -3.76415900 | 4.90518800  | -4.59153100 |
| H | -4.92326700 | 2.77276900  | -4.00978400 |
| H | -4.76811800 | 1.84916900  | -1.73879400 |
| H | -0.63726300 | 6.39746400  | 1.65361200  |
| H | -0.40827400 | 5.48588400  | 3.94269600  |
| H | -1.57837000 | 3.37533600  | 4.56503200  |
| H | -2.90577600 | 2.14530600  | 2.90658400  |
| H | -1.56772600 | 6.24859100  | -0.59854600 |
| C | 2.70501600  | 3.21364800  | -1.51178500 |
| C | 1.39571100  | 2.93098800  | -1.01615400 |
| C | 0.24143800  | 3.19826200  | -1.76165100 |
| C | 0.41528900  | 3.78516700  | -3.00499900 |
| C | 1.70368400  | 4.09567500  | -3.50989500 |
| C | 2.84500200  | 3.81656500  | -2.78051600 |
| C | 3.62724900  | 2.73755500  | -0.53965500 |
| C | 2.86094000  | 2.19746800  | 0.51649100  |
| H | -0.74006900 | 2.94240400  | -1.38339700 |
| H | -0.46220000 | 4.00662600  | -3.60527300 |
| H | 1.79013300  | 4.54780100  | -4.49363200 |
| H | 3.83018400  | 4.03664900  | -3.18166400 |
| N | 1.51769400  | 2.36011000  | 0.21956900  |
| H | 0.72649000  | 1.87881100  | 0.67963400  |
| C | 5.11384400  | 2.88086800  | -0.62657200 |
| H | 5.48513700  | 2.49158400  | -1.58113900 |

|   |            |             |             |
|---|------------|-------------|-------------|
| H | 5.41390000 | 3.93557900  | -0.56625000 |
| H | 5.63255700 | 2.35097600  | 0.17665300  |
| C | 3.37649200 | 1.46903600  | 1.63930700  |
| H | 4.45687800 | 1.42320600  | 1.58606600  |
| C | 2.89599800 | 1.51085300  | 3.03830500  |
| C | 1.54666800 | 1.71636100  | 3.37278400  |
| C | 3.84438200 | 1.30585100  | 4.07766000  |
| C | 1.13678200 | 1.73144600  | 4.70209900  |
| H | 0.79150800 | 1.82635400  | 2.60896400  |
| C | 3.40645900 | 1.33964100  | 5.40292600  |
| C | 2.06545500 | 1.54857000  | 5.72358000  |
| H | 0.08600200 | 1.87607400  | 4.92692700  |
| H | 4.13310800 | 1.19380900  | 6.19814300  |
| H | 1.75156100 | 1.55887600  | 6.76373800  |
| C | 5.30828400 | 1.04768200  | 3.80110800  |
| H | 5.78026500 | 1.87714400  | 3.25961500  |
| H | 5.85398500 | 0.92003400  | 4.74011400  |
| H | 5.46487100 | 0.14243200  | 3.20461600  |
| C | 2.62134200 | 0.21100700  | -2.92454600 |
| C | 3.99686900 | 0.08708000  | -3.32493000 |
| C | 4.34818200 | 0.38261500  | -4.66729100 |
| C | 3.35124000 | 0.76615700  | -5.53659600 |
| C | 1.99158500 | 0.86501700  | -5.11457800 |
| C | 1.60591100 | 0.58508800  | -3.82133800 |
| C | 3.77708800 | -0.45733800 | -1.12328200 |
| C | 4.70064500 | -0.36145900 | -2.19498200 |
| H | 5.38022800 | 0.30303200  | -4.99703700 |
| H | 3.59662100 | 1.00014700  | -6.56846800 |
| H | 1.24222500 | 1.17336300  | -5.83777800 |
| H | 0.58073300 | 0.65644200  | -3.47985400 |
| H | 5.75146500 | -0.60001000 | -2.14088000 |
| N | 2.52529600 | -0.11797200 | -1.61754000 |
| H | 1.59662100 | -0.19951100 | -1.16151500 |
| C | 3.97756900 | -0.77976400 | 0.23871800  |
| C | 5.30474500 | -1.20320400 | 0.74145700  |
| C | 5.37704300 | -2.24806600 | 1.67931700  |
| C | 6.49192000 | -0.53957600 | 0.38762700  |
| C | 6.59802400 | -2.63274000 | 2.22613800  |
| H | 4.46694500 | -2.76018400 | 1.96924600  |
| C | 7.71184500 | -0.91967400 | 0.94434000  |
| H | 6.45171600 | 0.30247900  | -0.29188300 |
| C | 7.77147700 | -1.96983100 | 1.86096600  |
| H | 6.63234600 | -3.44909700 | 2.94192600  |
| H | 8.61583500 | -0.38361100 | 0.66990800  |

|   |            |             |            |
|---|------------|-------------|------------|
| H | 8.72306400 | -2.26366000 | 2.29408200 |
| C | 2.97521300 | -0.52058900 | 1.19409300 |
| H | 1.93983800 | -0.40407700 | 0.89367300 |
| H | 3.10638200 | -0.92896200 | 2.18870300 |

**Int6**

|   |             |             |             |
|---|-------------|-------------|-------------|
| C | 4.12885200  | -0.69805100 | -0.48223200 |
| C | 3.48378000  | 0.48592600  | -0.09743800 |
| C | 3.96351600  | 1.75139900  | -0.45108200 |
| C | 5.12198700  | 1.80191200  | -1.22490800 |
| H | 5.51842800  | 2.77490200  | -1.50489800 |
| C | 3.55863200  | -1.99589900 | -0.00682500 |
| C | 2.21693800  | -2.26990200 | -0.30095100 |
| C | 1.56530100  | -3.42349500 | 0.14664500  |
| C | 2.32663100  | -4.34027100 | 0.87464600  |
| H | 1.85048600  | -5.25351300 | 1.22293100  |
| O | 2.32013600  | 0.40141300  | 0.64641300  |
| O | 1.49900500  | -1.33535900 | -1.01830900 |
| P | 0.93940600  | -0.03143900 | -0.16109700 |
| O | -0.00702500 | -0.47200300 | 0.92369900  |
| O | 0.52857500  | 0.96653200  | -1.19828800 |
| C | 5.75672600  | 0.64442700  | -1.69085900 |
| C | 7.00125900  | 0.79175800  | -2.54924500 |
| C | 5.24551800  | -0.61887500 | -1.34264600 |
| C | 7.30742000  | -0.44537900 | -3.39681400 |
| H | 7.86081300  | 0.98878000  | -1.89024700 |
| H | 6.90304400  | 1.67907700  | -3.18619400 |
| C | 5.80260500  | -1.87694100 | -1.98913400 |
| C | 7.22244800  | -1.70476100 | -2.53264100 |
| H | 8.29800500  | -0.34796600 | -3.85652600 |
| H | 6.57972300  | -0.52275700 | -4.21647600 |
| H | 5.75505300  | -2.72556000 | -1.30379300 |
| H | 5.13337200  | -2.14225600 | -2.82210700 |
| H | 7.50902300  | -2.59432600 | -3.10599700 |
| H | 7.93223400  | -1.62147600 | -1.69700000 |
| C | 4.27671200  | -2.89560900 | 0.81015900  |
| C | 5.63981200  | -2.50972400 | 1.36121800  |
| C | 3.66038100  | -4.09474100 | 1.21596900  |
| C | 6.45208700  | -3.69987100 | 1.87662000  |
| H | 5.46823100  | -1.80799300 | 2.19202400  |
| H | 6.21674100  | -1.94523000 | 0.62655000  |
| C | 4.40827900  | -5.13973800 | 2.02541400  |
| C | 5.59762500  | -4.56816900 | 2.80111500  |
| H | 7.34719800  | -3.33715500 | 2.39535000  |

|   |             |             |             |
|---|-------------|-------------|-------------|
| H | 6.79997100  | -4.30649900 | 1.02805100  |
| H | 3.71074500  | -5.64304500 | 2.70580700  |
| H | 4.77637300  | -5.91931900 | 1.34080500  |
| H | 6.18892400  | -5.38363200 | 3.23397500  |
| H | 5.23422300  | -3.95556100 | 3.63781500  |
| C | 0.10484000  | -3.61780900 | -0.07525000 |
| C | -0.40824000 | -3.80056800 | -1.37964100 |
| C | -0.77176800 | -3.60752900 | 1.03528300  |
| C | -1.82204700 | -4.02505000 | -1.56786000 |
| C | -2.17902800 | -3.86119000 | 0.83761200  |
| C | -2.66788100 | -4.06384000 | -0.45457000 |
| C | 3.22636500  | 2.97799100  | -0.02762800 |
| C | 3.36273200  | 3.45151700  | 1.29486000  |
| C | 2.35826900  | 3.62402600  | -0.93279700 |
| C | 2.62121800  | 4.61655800  | 1.71463900  |
| C | 1.59642300  | 4.76966700  | -0.49257600 |
| C | 1.76058400  | 5.24410500  | 0.81064200  |
| C | 0.42610600  | -3.77860900 | -2.54000900 |
| C | -2.32208800 | -4.21514500 | -2.89279300 |
| C | -0.09590000 | -3.93824600 | -3.79645000 |
| C | -1.48935500 | -4.16064900 | -3.97859700 |
| H | -3.38168100 | -4.42410000 | -3.01861800 |
| H | -1.88527300 | -4.30155800 | -4.98039500 |
| H | 0.55811600  | -3.90370700 | -4.66275000 |
| H | 1.49023400  | -3.62345300 | -2.41106200 |
| H | -3.72874400 | -4.25600900 | -0.59716500 |
| C | -0.32906200 | -3.30265800 | 2.36051200  |
| C | -1.20155500 | -3.29874900 | 3.41739800  |
| C | -3.05077700 | -3.86941700 | 1.96892300  |
| C | -2.57731600 | -3.60355400 | 3.22482600  |
| H | -4.10474700 | -4.07678300 | 1.80360800  |
| H | -3.25301900 | -3.59064200 | 4.07490500  |
| H | -0.84701600 | -3.03882800 | 4.41000400  |
| H | 0.70906900  | -3.03707400 | 2.51167900  |
| C | 2.75428700  | 5.07365200  | 3.06164100  |
| C | 4.20479300  | 2.80885600  | 2.25527000  |
| C | 0.66104700  | 5.36818500  | -1.39227700 |
| C | 2.16510200  | 3.16324900  | -2.27185300 |
| C | 3.56707800  | 4.42388900  | 3.95171000  |
| C | 4.30262900  | 3.27627800  | 3.53911400  |
| C | 0.49572200  | 4.88126800  | -2.66000100 |
| C | 1.27122200  | 3.77460000  | -3.10673800 |
| H | 2.18572300  | 5.94943600  | 3.36455200  |
| H | 3.65594500  | 4.78023800  | 4.97431400  |



|   |             |             |             |
|---|-------------|-------------|-------------|
| H | 4.94533200  | 2.76853300  | 4.25307500  |
| H | 4.76520500  | 1.93265000  | 1.94824000  |
| H | 0.07296000  | 6.21010900  | -1.03590400 |
| H | -0.23659300 | 5.32296900  | -3.32961000 |
| H | 1.11821900  | 3.39197000  | -4.10936800 |
| H | 2.71346800  | 2.29103100  | -2.60452600 |
| H | 1.17554200  | 6.09875400  | 1.14190900  |
| C | -2.90501500 | 2.92598900  | 1.64533600  |
| C | -1.57211100 | 2.71018300  | 1.18190100  |
| C | -0.44965300 | 3.00593100  | 1.96256500  |
| C | -0.67412300 | 3.54540400  | 3.22227200  |
| C | -1.98467100 | 3.78112300  | 3.69849400  |
| C | -3.09748200 | 3.47807100  | 2.92531600  |
| C | -3.78686800 | 2.44082000  | 0.61915800  |
| C | -2.97575800 | 1.95045100  | -0.39704200 |
| H | 0.55069200  | 2.80299900  | 1.60016600  |
| H | 0.17893800  | 3.78554300  | 3.85063300  |
| H | -2.11981100 | 4.20187000  | 4.69141900  |
| H | -4.10052300 | 3.65071300  | 3.30745200  |
| N | -1.65142300 | 2.14965900  | -0.06464800 |
| H | -0.83922000 | 1.83189700  | -0.61576700 |
| C | -5.28285700 | 2.47258100  | 0.67595400  |
| H | -5.66620000 | 1.92569800  | 1.54817100  |
| H | -5.65983900 | 3.50081500  | 0.75717600  |
| H | -5.73482600 | 2.03328000  | -0.21844600 |
| C | -3.31860700 | 1.14577800  | -1.61230400 |
| H | -4.40066700 | 1.21590400  | -1.75994300 |
| C | -2.64896900 | 1.66054600  | -2.88487300 |
| C | -1.53841200 | 1.02446800  | -3.44376000 |
| C | -3.16846100 | 2.82074200  | -3.50040500 |
| C | -0.95243600 | 1.50292000  | -4.61548100 |
| H | -1.08849800 | 0.17285900  | -2.95025200 |
| C | -2.56619700 | 3.28724700  | -4.67239200 |
| C | -1.47150800 | 2.63378100  | -5.23842600 |
| H | -0.08434200 | 0.99404300  | -5.02382300 |
| H | -2.96936400 | 4.17705300  | -5.15017500 |
| H | -1.02476200 | 3.01454600  | -6.15308000 |
| C | -4.34680900 | 3.56293500  | -2.91885200 |
| H | -4.15125800 | 3.87494400  | -1.88704400 |
| H | -4.57426100 | 4.45483000  | -3.50994400 |
| H | -5.25296000 | 2.94233800  | -2.89744500 |
| C | -2.63923600 | -0.23468200 | 2.79531800  |
| C | -3.99578300 | -0.52480800 | 3.21299300  |
| C | -4.33960400 | -0.37898700 | 4.58829800  |

|   |             |             |             |
|---|-------------|-------------|-------------|
| C | -3.36452200 | 0.03259500  | 5.45870700  |
| C | -2.02525100 | 0.30423800  | 5.01687500  |
| C | -1.63884500 | 0.16245400  | 3.70722100  |
| C | -3.77892600 | -0.81576000 | 0.95946400  |
| C | -4.67856100 | -0.93720800 | 2.07714400  |
| H | -5.35053900 | -0.58436100 | 4.92706800  |
| H | -3.59896000 | 0.16267200  | 6.51085400  |
| H | -1.29729900 | 0.63618600  | 5.75087300  |
| H | -0.63648700 | 0.36984600  | 3.35524900  |
| H | -5.70271400 | -1.27128700 | 2.01897300  |
| N | -2.54173800 | -0.42776200 | 1.47415500  |
| H | -1.60489600 | -0.39379600 | 1.00675400  |
| C | -4.01633700 | -0.91486200 | -0.39740600 |
| C | -5.32421600 | -1.31846100 | -0.93748400 |
| C | -5.36750600 | -2.18555200 | -2.04614600 |
| C | -6.54130500 | -0.83670900 | -0.41893900 |
| C | -6.58349800 | -2.59882600 | -2.58009600 |
| H | -4.44093000 | -2.55760200 | -2.46641700 |
| C | -7.75613500 | -1.23774400 | -0.96882800 |
| H | -6.52795800 | -0.10468600 | 0.37833800  |
| C | -7.78355300 | -2.12861200 | -2.04254200 |
| H | -6.59423200 | -3.28452100 | -3.42222300 |
| H | -8.68304100 | -0.84028600 | -0.56590100 |
| H | -8.73230800 | -2.44151500 | -2.46823900 |
| C | -3.01069900 | -0.39849300 | -1.36789200 |
| H | -1.98427100 | -0.51785900 | -1.02200400 |
| H | -3.10524700 | -0.90272400 | -2.33086900 |

#### TS5

|   |             |             |             |
|---|-------------|-------------|-------------|
| C | 3.78894500  | 0.26138800  | -0.19742200 |
| C | 3.08716500  | 1.11537300  | 0.66223600  |
| C | 3.15655100  | 2.51004200  | 0.56182400  |
| C | 4.00820100  | 3.03499000  | -0.41035600 |
| H | 4.08827400  | 4.11521500  | -0.50191300 |
| C | 3.58278500  | -1.21252300 | -0.06931800 |
| C | 2.27326100  | -1.70375100 | -0.16237300 |
| C | 1.98226100  | -3.07130700 | -0.14934600 |
| C | 3.05806200  | -3.94948000 | -0.01438000 |
| H | 2.85860900  | -5.01824800 | -0.01174700 |
| O | 2.27031900  | 0.55647200  | 1.63178800  |
| O | 1.23161500  | -0.79900000 | -0.24579800 |
| P | 0.80587100  | -0.02867700 | 1.17094400  |
| O | 0.35377300  | -1.01901000 | 2.19814900  |
| O | -0.12332500 | 1.07116000  | 0.71860200  |

|   |             |             |             |
|---|-------------|-------------|-------------|
| C | 4.70404000  | 2.22068700  | -1.31103400 |
| C | 5.56966100  | 2.87954600  | -2.36974200 |
| C | 4.56739800  | 0.82207400  | -1.23560300 |
| C | 5.75869500  | 2.01132100  | -3.61557800 |
| H | 6.55882500  | 3.09522500  | -1.93765000 |
| H | 5.13936300  | 3.85154100  | -2.63828800 |
| C | 5.10033300  | -0.06220700 | -2.35181600 |
| C | 6.18473100  | 0.60175300  | -3.20335800 |
| H | 6.49945200  | 2.46787800  | -4.28246600 |
| H | 4.81427700  | 1.95750800  | -4.17563000 |
| H | 5.45934900  | -1.01676400 | -1.96399600 |
| H | 4.24378500  | -0.31765800 | -2.99474700 |
| H | 6.39091100  | -0.01925800 | -4.08306500 |
| H | 7.12098000  | 0.66141900  | -2.63017800 |
| C | 4.63900000  | -2.11896800 | 0.16588200  |
| C | 6.01928200  | -1.60518600 | 0.54163500  |
| C | 4.37013400  | -3.49938900 | 0.16673000  |
| C | 7.12849400  | -2.64224700 | 0.35201800  |
| H | 5.98183400  | -1.31514200 | 1.60281000  |
| H | 6.25701400  | -0.68609700 | 0.00192700  |
| C | 5.47568500  | -4.52705100 | 0.33270800  |
| C | 6.73098000  | -3.96714200 | 1.00572100  |
| H | 8.06542100  | -2.26140000 | 0.77522500  |
| H | 7.30635200  | -2.80418700 | -0.72105900 |
| H | 5.09248600  | -5.38916500 | 0.89171000  |
| H | 5.75004000  | -4.91105500 | -0.66179900 |
| H | 7.54600900  | -4.69775500 | 0.94322400  |
| H | 6.53450400  | -3.79663900 | 2.07320600  |
| C | 0.58180100  | -3.57244400 | -0.26207000 |
| C | -0.08699100 | -3.51220500 | -1.50522600 |
| C | -0.05478200 | -4.14415600 | 0.86083900  |
| C | -1.41758800 | -4.06140900 | -1.62663600 |
| C | -1.39176900 | -4.67654900 | 0.73089800  |
| C | -2.03793200 | -4.61661900 | -0.50502200 |
| C | 2.26669400  | 3.36388700  | 1.39737500  |
| C | 1.16795900  | 4.01297200  | 0.79139800  |
| C | 2.47325100  | 3.45816400  | 2.78911900  |
| C | 0.23977000  | 4.75388300  | 1.61199200  |
| C | 1.54580000  | 4.21067000  | 3.59866000  |
| C | 0.45240200  | 4.83196200  | 2.99024000  |
| C | 0.50313900  | -2.92441000 | -2.66749900 |
| C | -2.07188000 | -4.02156700 | -2.89726400 |
| C | -0.15948300 | -2.89544600 | -3.86623600 |
| C | -1.46158700 | -3.45951400 | -3.98825500 |

|   |             |             |             |
|---|-------------|-------------|-------------|
| H | -3.06601700 | -4.45531500 | -2.97688300 |
| H | -1.96394800 | -3.44773100 | -4.95166600 |
| H | 0.30672900  | -2.42847900 | -4.72707700 |
| H | 1.49032700  | -2.48504000 | -2.58621600 |
| H | -3.04271100 | -5.02259600 | -0.59875300 |
| C | 0.57076500  | -4.21215900 | 2.14560300  |
| C | -0.05935200 | -4.80628900 | 3.20518400  |
| C | -2.01998100 | -5.26981500 | 1.86860600  |
| C | -1.36860200 | -5.34947800 | 3.06711400  |
| H | -3.03105900 | -5.65201900 | 1.75813700  |
| H | -1.85921500 | -5.79329700 | 3.92764900  |
| H | 0.43221100  | -4.84164100 | 4.17324000  |
| H | 1.54769100  | -3.76330300 | 2.27096800  |
| C | -0.88372700 | 5.38449300  | 0.99411000  |
| C | 0.90291500  | 3.93669800  | -0.61118700 |
| C | 1.76660300  | 4.29544300  | 5.00769100  |
| C | 3.57988900  | 2.83192700  | 3.44195600  |
| C | -1.08650200 | 5.29889200  | -0.35596400 |
| C | -0.18288500 | 4.55717700  | -1.16704900 |
| C | 2.83828500  | 3.67747100  | 5.59254800  |
| C | 3.75741700  | 2.93730000  | 4.79547200  |
| H | -1.58220200 | 5.92761300  | 1.62527600  |
| H | -1.94529900 | 5.78352900  | -0.80931400 |
| H | -0.36350600 | 4.46742000  | -2.23438200 |
| H | 1.57160500  | 3.36415800  | -1.23928800 |
| H | 1.05884200  | 4.86448200  | 5.60563000  |
| H | 2.99376500  | 3.74825400  | 6.66548100  |
| H | 4.60536300  | 2.45144900  | 5.27000300  |
| H | 4.28433300  | 2.26670700  | 2.84205400  |
| H | -0.25245100 | 5.38780700  | 3.60501300  |
| H | -1.64557400 | 1.09338200  | 0.26475500  |
| N | -2.59896700 | 1.28815300  | -0.17109000 |
| N | -2.31914500 | -1.33186400 | 1.70649300  |
| H | -1.32055200 | -1.10447800 | 1.62898500  |
| C | -3.27629000 | -0.49598500 | -0.46917600 |
| C | -2.11629100 | -0.72699600 | -1.43614300 |
| H | -1.17388600 | -0.81129900 | -0.89528600 |
| H | -2.25139300 | -1.66652700 | -1.97087000 |
| C | -2.07776500 | 0.48568600  | -2.41963900 |
| H | -2.86765900 | 0.33812600  | -3.15698800 |
| C | -2.52239800 | 1.64069600  | -1.56464100 |
| C | -3.29861500 | 2.33890500  | 0.47453200  |
| C | -3.54797400 | 2.49967400  | 1.82746200  |
| H | -3.19773500 | 1.77361000  | 2.55369600  |

|   |             |             |             |
|---|-------------|-------------|-------------|
| C | -4.27267700 | 3.63600400  | 2.20304500  |
| H | -4.50055600 | 3.80116400  | 3.25145500  |
| C | -4.70984500 | 4.56173100  | 1.24450400  |
| H | -5.27394500 | 5.43223000  | 1.56688500  |
| C | -4.42251700 | 4.39544100  | -0.11352600 |
| H | -4.74528600 | 5.13358600  | -0.84206600 |
| C | -3.69248800 | 3.27367500  | -0.50426000 |
| C | -3.18899000 | 2.79626700  | -1.79431700 |
| C | -3.42799600 | 3.44375900  | -3.11793400 |
| H | -3.04507000 | 4.47198100  | -3.12839300 |
| H | -4.50036200 | 3.49337100  | -3.34571300 |
| H | -2.92807700 | 2.89459500  | -3.92080900 |
| C | -3.36737700 | -1.15517300 | 0.82065300  |
| C | -4.52163700 | -1.70325100 | 1.39554300  |
| H | -5.49458700 | -1.73570800 | 0.93063900  |
| C | -4.16494700 | -2.22898900 | 2.66450700  |
| C | -4.86455900 | -2.88974200 | 3.69812000  |
| H | -5.92010700 | -3.12317300 | 3.58831500  |
| C | -4.18017000 | -3.21755000 | 4.85381500  |
| H | -4.70125000 | -3.71974000 | 5.66407900  |
| C | -2.80630700 | -2.89953500 | 5.01114700  |
| H | -2.30826800 | -3.16661300 | 5.93917700  |
| C | -2.08469700 | -2.26673900 | 4.01437300  |
| H | -1.03170100 | -2.02943700 | 4.10686200  |
| C | -2.77629400 | -1.95184800 | 2.83642500  |
| C | -4.61120600 | -0.29676500 | -1.12714800 |
| C | -5.60919500 | 0.47473000  | -0.51259900 |
| H | -5.41293200 | 0.93665400  | 0.44593400  |
| C | -6.84538800 | 0.65691600  | -1.12857100 |
| H | -7.59849100 | 1.27118500  | -0.64397400 |
| C | -7.11577400 | 0.04952500  | -2.35495200 |
| H | -8.08142200 | 0.18787100  | -2.83274400 |
| C | -6.14243000 | -0.74746200 | -2.95883400 |
| H | -6.34989400 | -1.24238400 | -3.90314200 |
| C | -4.89867100 | -0.91495500 | -2.35423800 |
| H | -4.16062200 | -1.55220700 | -2.82947400 |
| C | -0.77143900 | 0.65804300  | -3.17156500 |
| C | 0.36977100  | 1.08108100  | -2.48745600 |
| H | 0.30424200  | 1.28942300  | -1.42693100 |
| C | 1.59012600  | 1.21459900  | -3.14574900 |
| H | 2.46512400  | 1.53322200  | -2.59122600 |
| C | 1.67424600  | 0.93199200  | -4.50785500 |
| H | 2.62066400  | 1.03135100  | -5.03344900 |
| C | 0.53336900  | 0.52552100  | -5.19945100 |

|   |             |             |             |
|---|-------------|-------------|-------------|
| H | 0.59488200  | 0.31315500  | -6.26435900 |
| C | -0.69970800 | 0.38349600  | -4.55165800 |
| C | -1.90582500 | -0.06540700 | -5.34506400 |
| H | -2.70228500 | 0.69008800  | -5.35237800 |
| H | -2.33871800 | -0.98757500 | -4.94106100 |
| H | -1.63081100 | -0.25899200 | -6.38633300 |

**(R,R)-3aa**

|   |             |             |             |
|---|-------------|-------------|-------------|
| N | 0.09256900  | 0.07298600  | 0.84256300  |
| N | -1.80768000 | -1.28795200 | -0.80194700 |
| H | -1.16322100 | -1.89862900 | -0.32213500 |
| C | -0.34462200 | 0.69306400  | -0.41194700 |
| C | 0.85433100  | 0.26291600  | -1.32332500 |
| H | 0.67405600  | -0.74822400 | -1.69958500 |
| H | 0.97913000  | 0.92943000  | -2.17753600 |
| C | 2.09744900  | 0.24081500  | -0.38162900 |
| H | 2.47968000  | 1.26563000  | -0.30001200 |
| C | 1.46342400  | -0.13119700 | 0.93056300  |
| C | -0.49938600 | -0.18492400 | 2.06391600  |
| C | -1.83278100 | -0.11117000 | 2.47594600  |
| H | -2.61209700 | 0.21681800  | 1.79641100  |
| C | -2.11268100 | -0.47247100 | 3.79005500  |
| H | -3.13803000 | -0.42676600 | 4.14546200  |
| C | -1.09409000 | -0.89559200 | 4.66718200  |
| H | -1.35185500 | -1.17076100 | 5.68603700  |
| C | 0.23117200  | -0.96409700 | 4.25208700  |
| H | 1.00905700  | -1.28919700 | 4.93788900  |
| C | 0.55291100  | -0.60243300 | 2.93449800  |
| C | 1.79736600  | -0.55217000 | 2.19352600  |
| C | 3.15525200  | -0.89895500 | 2.72168200  |
| H | 3.20608200  | -1.94497400 | 3.05205700  |
| H | 3.41778900  | -0.27728900 | 3.58738600  |
| H | 3.92515300  | -0.75735900 | 1.95871000  |
| C | -1.65858200 | 0.09314900  | -0.83809200 |
| C | -2.83325300 | 0.65688000  | -1.27165000 |
| H | -3.01222700 | 1.71230200  | -1.40968600 |
| C | -3.76766700 | -0.41274100 | -1.49899500 |
| C | -5.10188500 | -0.47360400 | -1.93305500 |
| H | -5.63574500 | 0.43551000  | -2.19627700 |
| C | -5.72774600 | -1.71092500 | -2.01343900 |
| H | -6.76061100 | -1.77022700 | -2.34440400 |
| C | -5.04603400 | -2.89604600 | -1.67032100 |
| H | -5.56377200 | -3.84834500 | -1.73993100 |

|   |             |             |             |
|---|-------------|-------------|-------------|
| C | -3.72235000 | -2.86999500 | -1.24571600 |
| H | -3.19601200 | -3.78340700 | -0.98325500 |
| C | -3.09608200 | -1.62372200 | -1.16969100 |
| C | -0.41525000 | 2.21838100  | -0.31100900 |
| C | -0.22897500 | 2.88063300  | 0.90455100  |
| H | -0.05254600 | 2.31031000  | 1.80901000  |
| C | -0.27072300 | 4.27520800  | 0.96326700  |
| H | -0.12421200 | 4.77400600  | 1.91713000  |
| C | -0.49799400 | 5.02351300  | -0.19026500 |
| H | -0.53031400 | 6.10823300  | -0.14235100 |
| C | -0.68075800 | 4.36852600  | -1.40983600 |
| H | -0.85511400 | 4.94049600  | -2.31690600 |
| C | -0.63537300 | 2.97736300  | -1.46891700 |
| H | -0.78124000 | 2.47474000  | -2.42069200 |
| C | 3.19923300  | -0.66391700 | -0.89450000 |
| C | 3.17494900  | -2.03148000 | -0.59997800 |
| H | 2.39038800  | -2.41222200 | 0.04773100  |
| C | 4.14439200  | -2.89677600 | -1.10293000 |
| H | 4.10844200  | -3.95426100 | -0.85680300 |
| C | 5.15816500  | -2.39404900 | -1.91631600 |
| H | 5.92344300  | -3.05455600 | -2.31413800 |
| C | 5.18714300  | -1.03319500 | -2.21728100 |
| H | 5.97748300  | -0.64040600 | -2.85233400 |
| C | 4.21947100  | -0.15225800 | -1.72097200 |
| C | 4.29030500  | 1.31447700  | -2.07828200 |
| H | 4.44146400  | 1.94395300  | -1.19229700 |
| H | 3.37289100  | 1.66520700  | -2.56566800 |
| H | 5.12174500  | 1.50548800  | -2.76288700 |

**Int5'**

|   |             |             |             |
|---|-------------|-------------|-------------|
| C | -3.51812600 | -1.58259400 | -0.89173300 |
| C | -2.23952300 | -2.02574900 | -0.53075400 |
| C | -1.64013500 | -3.14409900 | -1.11871100 |
| C | -2.35206000 | -3.78431800 | -2.13378000 |
| H | -1.90942700 | -4.65989000 | -2.60245300 |
| C | -4.10909700 | -0.45191900 | -0.11536200 |
| C | -3.40791900 | 0.75895700  | -0.06124700 |
| C | -3.87182300 | 1.85487900  | 0.67581300  |
| C | -5.08318700 | 1.70903900  | 1.35087500  |
| H | -5.46521300 | 2.55347300  | 1.91953100  |
| O | -1.54425100 | -1.31013200 | 0.43136700  |
| O | -2.20765900 | 0.85765000  | -0.74707500 |
| P | -0.87807000 | 0.12792700  | -0.06979400 |
| O | -0.47733700 | 0.83511800  | 1.19624900  |

|   |             |             |             |
|---|-------------|-------------|-------------|
| O | 0.11610500  | -0.08199600 | -1.17440500 |
| C | -3.58907300 | -3.31644900 | -2.59072500 |
| C | -4.27776200 | -4.06054600 | -3.72116400 |
| C | -4.17739400 | -2.19632500 | -1.97823500 |
| C | -5.33373300 | -3.22236900 | -4.44635900 |
| H | -4.76306500 | -4.95790500 | -3.30752300 |
| H | -3.52481600 | -4.42666400 | -4.42940200 |
| C | -5.44043200 | -1.57664300 | -2.55262700 |
| C | -6.24752200 | -2.53832500 | -3.42771400 |
| H | -5.91028800 | -3.85696900 | -5.12966000 |
| H | -4.84082300 | -2.45558100 | -5.06001200 |
| H | -6.06885400 | -1.16258100 | -1.76091700 |
| H | -5.13506300 | -0.71165700 | -3.16108900 |
| H | -7.05505900 | -1.99195000 | -3.92919000 |
| H | -6.72368200 | -3.30246800 | -2.79644600 |
| C | -5.28832800 | -0.60164000 | 0.64793900  |
| C | -5.92849900 | -1.97158900 | 0.80766700  |
| C | -5.79121500 | 0.50266600  | 1.35927400  |
| C | -7.37592500 | -1.91656900 | 1.30078400  |
| H | -5.32385000 | -2.53323900 | 1.53655100  |
| H | -5.86438200 | -2.54576200 | -0.11800300 |
| C | -7.09318100 | 0.42672400  | 2.13708900  |
| C | -7.48863600 | -1.00115200 | 2.52057400  |
| H | -7.72329700 | -2.92937000 | 1.53631800  |
| H | -8.02526300 | -1.53528700 | 0.49954200  |
| H | -7.02273800 | 1.06004500  | 3.02967300  |
| H | -7.89633200 | 0.86133500  | 1.52231600  |
| H | -8.50618400 | -1.01064600 | 2.92862300  |
| H | -6.82222600 | -1.37075800 | 3.31226700  |
| C | -3.06863700 | 3.10774900  | 0.76132700  |
| C | -3.10423800 | 4.03318500  | -0.30117000 |
| C | -2.24755200 | 3.34005300  | 1.88454200  |
| C | -2.26881400 | 5.20905600  | -0.25328400 |
| C | -1.40056500 | 4.50887600  | 1.91537300  |
| C | -1.43274000 | 5.40983400  | 0.84759400  |
| C | -0.31299700 | -3.65566700 | -0.66771400 |
| C | -0.22523500 | -4.37427000 | 0.54552800  |
| C | 0.83422100  | -3.46099600 | -1.46491500 |
| C | 1.04148800  | -4.93054800 | 0.95498300  |
| C | 2.09656400  | -4.02369400 | -1.04522500 |
| C | 2.16613100  | -4.74319300 | 0.14863700  |
| C | -3.92272500 | 3.83405800  | -1.45708700 |
| C | -2.28976600 | 6.11665300  | -1.35532000 |
| C | -3.90942700 | 4.72650600  | -2.49697600 |



|   |             |             |             |
|---|-------------|-------------|-------------|
| C | -3.08118400 | 5.88424900  | -2.44797000 |
| H | -1.64937900 | 6.99394500  | -1.31101500 |
| H | -3.08172000 | 6.58070600  | -3.28178700 |
| H | -4.53648000 | 4.55393200  | -3.36721500 |
| H | -4.55348300 | 2.95291900  | -1.49871900 |
| H | -0.78591300 | 6.28410000  | 0.87065700  |
| C | -2.19861100 | 2.44386400  | 2.99771200  |
| C | -1.37777800 | 2.68729400  | 4.06490400  |
| C | -0.53530400 | 4.70839600  | 3.03547400  |
| C | -0.52293500 | 3.82652700  | 4.08115800  |
| H | 0.11180900  | 5.58192400  | 3.03669000  |
| H | 0.14159400  | 3.98609200  | 4.92546700  |
| H | -1.35805800 | 1.99408200  | 4.90117000  |
| H | -2.81467500 | 1.55361200  | 2.97366800  |
| C | 1.12066200  | -5.64631300 | 2.18712100  |
| C | -1.35081700 | -4.56922200 | 1.40502700  |
| C | 3.25147000  | -3.82016500 | -1.86142900 |
| C | 0.80807900  | -2.69414600 | -2.67218800 |
| C | 0.01927600  | -5.80532100 | 2.98361500  |
| C | -1.23191700 | -5.25534100 | 2.58525400  |
| C | 3.17904300  | -3.09411300 | -3.01818100 |
| C | 1.94076200  | -2.51719600 | -3.42058000 |
| H | 2.08591700  | -6.04591000 | 2.48638800  |
| H | 0.09462200  | -6.34566200 | 3.92320000  |
| H | -2.10097300 | -5.38553600 | 3.22445900  |
| H | -2.30913400 | -4.15746700 | 1.10912200  |
| H | 4.19185500  | -4.25679200 | -1.53421700 |
| H | 4.06863700  | -2.93115000 | -3.61951000 |
| H | 1.90240200  | -1.91415200 | -4.32295300 |
| H | -0.11956100 | -2.21872100 | -2.96372000 |
| H | 3.12211900  | -5.15028500 | 0.46906500  |
| C | 3.81072100  | 1.62832800  | 2.65526500  |
| C | 2.38122800  | 1.49154600  | 2.62540700  |
| C | 1.66809300  | 0.91838600  | 3.69023400  |
| C | 2.40209100  | 0.50910300  | 4.78318600  |
| C | 3.82092100  | 0.65832200  | 4.84975000  |
| C | 4.52750600  | 1.20158900  | 3.80631900  |
| C | 4.19468100  | 2.16138400  | 1.42224400  |
| C | 2.98394300  | 2.38245100  | 0.66211700  |
| H | 0.59719900  | 0.78388500  | 3.61329400  |
| H | 1.88982900  | 0.04416400  | 5.61975900  |
| H | 4.34167100  | 0.31126900  | 5.73664700  |
| H | 5.60853200  | 1.29372500  | 3.84740500  |
| N | 1.90903100  | 1.97614500  | 1.44920800  |

|   |             |             |             |
|---|-------------|-------------|-------------|
| H | 0.95366700  | 1.69609200  | 1.15312900  |
| C | 5.58692500  | 2.44708200  | 0.96544300  |
| H | 6.29299500  | 2.35157500  | 1.79436800  |
| H | 5.89367000  | 1.74297100  | 0.18387000  |
| H | 5.68628100  | 3.45917200  | 0.55693500  |
| C | 2.98385200  | 2.94123900  | -0.60020600 |
| H | 3.98594600  | 3.15791200  | -0.94734500 |
| C | 1.93632300  | 3.31954900  | -1.51008000 |
| C | 0.56863600  | 3.08096500  | -1.25043900 |
| C | 2.30641700  | 3.90911100  | -2.75930400 |
| C | -0.39906400 | 3.34096100  | -2.20807800 |
| H | 0.24864200  | 2.67892000  | -0.30198100 |
| C | 1.30904900  | 4.19997800  | -3.68550900 |
| C | -0.03183400 | 3.90713200  | -3.42660900 |
| H | -1.43044800 | 3.09186400  | -2.00372000 |
| H | 1.58778500  | 4.65160100  | -4.63388900 |
| H | -0.79047000 | 4.12576600  | -4.17197800 |
| C | 3.74256400  | 4.20252500  | -3.11929200 |
| H | 3.79481800  | 4.72725900  | -4.07700400 |
| H | 4.24283700  | 4.83000800  | -2.37248100 |
| H | 4.32812600  | 3.28050400  | -3.22013400 |
| C | 2.39086200  | -1.54178300 | 1.42164800  |
| C | 3.74042400  | -1.76720500 | 1.84824800  |
| C | 3.96829100  | -2.39232600 | 3.09025200  |
| C | 2.87992500  | -2.77065500 | 3.85681100  |
| C | 1.55510000  | -2.53810900 | 3.41244800  |
| C | 1.29009500  | -1.92658200 | 2.19982500  |
| C | 3.75906300  | -0.78491600 | -0.20168500 |
| C | 4.58140300  | -1.27619000 | 0.81153400  |
| H | 4.98306600  | -2.56950400 | 3.43672100  |
| H | 3.03853700  | -3.25964500 | 4.81424200  |
| H | 0.72344300  | -2.86437400 | 4.02903400  |
| H | 0.27568200  | -1.75449900 | 1.86705100  |
| H | 5.66120900  | -1.26441900 | 0.80223400  |
| N | 2.43997500  | -0.94393100 | 0.18983500  |
| H | 1.61712600  | -0.70968900 | -0.37979500 |
| C | 4.12003000  | -0.17344200 | -1.46929600 |
| C | 5.54316800  | -0.25545200 | -1.89781900 |
| C | 6.24458100  | -1.47114100 | -1.85299100 |
| C | 6.20739400  | 0.87544500  | -2.39585700 |
| C | 7.56317800  | -1.55017800 | -2.29697400 |
| H | 5.73881000  | -2.35390800 | -1.47970600 |
| C | 7.52757400  | 0.79869200  | -2.83764000 |
| H | 5.68352500  | 1.82575900  | -2.41954400 |

|   |            |             |             |
|---|------------|-------------|-------------|
| C | 8.21162900 | -0.41623700 | -2.78986100 |
| H | 8.08500300 | -2.50262200 | -2.26126100 |
| H | 8.02304500 | 1.69003400  | -3.21291400 |
| H | 9.24075700 | -0.47894200 | -3.13190200 |
| C | 3.20941200 | 0.45045500  | -2.25189800 |
| H | 2.15603300 | 0.50219900  | -2.00270400 |
| H | 3.50441200 | 0.85490800  | -3.21474000 |

**TS4'**

|   |             |             |             |
|---|-------------|-------------|-------------|
| C | -3.47004300 | -1.69255500 | -0.98845400 |
| C | -2.20053700 | -2.09887000 | -0.55411000 |
| C | -1.53014000 | -3.18280300 | -1.12941800 |
| C | -2.17122100 | -3.84362100 | -2.17964200 |
| H | -1.67033700 | -4.69408100 | -2.63559500 |
| C | -4.12214000 | -0.55010800 | -0.28332200 |
| C | -3.44113300 | 0.67303900  | -0.24196500 |
| C | -3.96723800 | 1.79608900  | 0.40371300  |
| C | -5.22300800 | 1.66187000  | 0.99841900  |
| H | -5.65493700 | 2.52659400  | 1.49639000  |
| O | -1.58758900 | -1.37277300 | 0.45551800  |
| O | -2.19397500 | 0.74968800  | -0.83840300 |
| P | -0.92838200 | 0.08807100  | 0.00515500  |
| O | -0.65591400 | 0.84300300  | 1.26775500  |
| O | 0.16562200  | -0.13598500 | -1.00971300 |
| C | -3.40308700 | -3.42439200 | -2.68985700 |
| C | -4.01062400 | -4.18763100 | -3.85356300 |
| C | -4.05495900 | -2.32363700 | -2.10649100 |
| C | -5.04143000 | -3.37358100 | -4.63912200 |
| H | -4.49995000 | -5.09357000 | -3.46410300 |
| H | -3.21128700 | -4.53982300 | -4.51663000 |
| C | -5.30092800 | -1.73732700 | -2.75066000 |
| C | -6.02945700 | -2.71651200 | -3.67419800 |
| H | -5.56100000 | -4.01996400 | -5.35621200 |
| H | -4.53205100 | -2.59293700 | -5.22105200 |
| H | -5.98634700 | -1.34479100 | -1.99679500 |
| H | -4.98515400 | -0.86078700 | -3.33698700 |
| H | -6.82021400 | -2.18884400 | -4.22039300 |
| H | -6.52189200 | -3.49488300 | -3.07356100 |
| C | -5.34820000 | -0.68364300 | 0.40245300  |
| C | -5.98042900 | -2.05430400 | 0.58258000  |
| C | -5.91424000 | 0.44659700  | 1.01958000  |
| C | -7.46176700 | -1.99762300 | 0.96169300  |
| H | -5.42671900 | -2.56886700 | 1.38308400  |
| H | -5.83743900 | -2.67225500 | -0.30576700 |

|   |             |             |             |
|---|-------------|-------------|-------------|
| C | -7.26879200 | 0.38767100  | 1.70352500  |
| C | -7.67605000 | -1.02656900 | 2.12390700  |
| H | -7.81504000 | -3.00288600 | 1.21981200  |
| H | -8.05278400 | -1.66460700 | 0.09634500  |
| H | -7.27165600 | 1.06236100  | 2.56816400  |
| H | -8.02901600 | 0.78188100  | 1.01184400  |
| H | -8.72127000 | -1.03172600 | 2.45484100  |
| H | -7.06725800 | -1.34897900 | 2.97999800  |
| C | -3.20305000 | 3.07181500  | 0.50415700  |
| C | -3.09564900 | 3.92457200  | -0.61409500 |
| C | -2.60133300 | 3.42545400  | 1.73084600  |
| C | -2.39585500 | 5.18086900  | -0.48979000 |
| C | -1.88829300 | 4.67633400  | 1.84069900  |
| C | -1.81394400 | 5.52475200  | 0.73271100  |
| C | -0.18774000 | -3.64426100 | -0.67037900 |
| C | -0.06848100 | -4.37365800 | 0.53258400  |
| C | 0.94416000  | -3.42918800 | -1.48651700 |
| C | 1.20702200  | -4.93998200 | 0.90114800  |
| C | 2.21301500  | -4.00792300 | -1.11261300 |
| C | 2.31005800  | -4.74947800 | 0.06658000  |
| C | -3.64986700 | 3.58671600  | -1.88784700 |
| C | -2.29570400 | 6.03356000  | -1.63189800 |
| C | -3.51608100 | 4.42288000  | -2.96456800 |
| C | -2.83289600 | 5.66627700  | -2.83697300 |
| H | -1.77310900 | 6.98067800  | -1.52144200 |
| H | -2.74438400 | 6.32135900  | -3.69924800 |
| H | -3.93633600 | 4.14053500  | -3.92558200 |
| H | -4.17506300 | 2.64392200  | -1.99042200 |
| H | -1.27840000 | 6.46753600  | 0.82005300  |
| C | -2.64522500 | 2.57408500  | 2.87928100  |
| C | -2.04399800 | 2.93922000  | 4.05346500  |
| C | -1.26530700 | 5.01373900  | 3.08225400  |
| C | -1.34112000 | 4.17377600  | 4.15907500  |
| H | -0.72529500 | 5.95493200  | 3.14762400  |
| H | -0.85898700 | 4.43838300  | 5.09581800  |
| H | -2.08493300 | 2.27390900  | 4.91147600  |
| H | -3.14323100 | 1.61675300  | 2.79513500  |
| C | 1.31219400  | -5.68079000 | 2.11675700  |
| C | -1.17422100 | -4.58086200 | 1.41488800  |
| C | 3.34307700  | -3.80429700 | -1.96219200 |
| C | 0.89276000  | -2.62717200 | -2.66957800 |
| C | 0.22927300  | -5.85100400 | 2.93562300  |
| C | -1.02917300 | -5.28788200 | 2.57919600  |
| C | 3.24476600  | -3.05117600 | -3.10060100 |

|   |             |             |             |
|---|-------------|-------------|-------------|
| C | 2.00590200  | -2.44076600 | -3.44581200 |
| H | 2.28208600  | -6.09108500 | 2.38443400  |
| H | 0.32452900  | -6.41108700 | 3.86175700  |
| H | -1.88231800 | -5.42603500 | 3.23768200  |
| H | -2.13641300 | -4.15858500 | 1.14888600  |
| H | 4.28593600  | -4.26523900 | -1.67741800 |
| H | 4.11478300  | -2.89497300 | -3.73159300 |
| H | 1.94842100  | -1.81259700 | -4.32996600 |
| H | -0.03774800 | -2.13478500 | -2.92001000 |
| H | 3.26957900  | -5.17505200 | 0.35017500  |
| C | 3.42728900  | 1.15917700  | 2.92480200  |
| C | 2.03496300  | 1.40854400  | 2.73407200  |
| C | 1.07969300  | 1.08514800  | 3.70610800  |
| C | 1.54597300  | 0.50286400  | 4.87150800  |
| C | 2.92557400  | 0.24551000  | 5.08764600  |
| C | 3.86611100  | 0.56853800  | 4.13258800  |
| C | 4.08666000  | 1.56253600  | 1.74148900  |
| C | 3.08904500  | 2.07044400  | 0.85987600  |
| H | 0.02863400  | 1.25335400  | 3.51443600  |
| H | 0.83465100  | 0.22498000  | 5.64446100  |
| H | 3.23648900  | -0.22386900 | 6.01600300  |
| H | 4.91946000  | 0.36089300  | 4.29408600  |
| N | 1.85702300  | 1.98503100  | 1.50350200  |
| H | 0.93576600  | 1.90757000  | 1.07027100  |
| C | 5.56979500  | 1.57712100  | 1.53592100  |
| H | 6.04402700  | 0.82785300  | 2.17589700  |
| H | 5.85746400  | 1.35025600  | 0.50614500  |
| H | 6.00184900  | 2.55320700  | 1.79619000  |
| C | 3.41084900  | 2.56536700  | -0.42729300 |
| H | 4.48568300  | 2.52613800  | -0.55340600 |
| C | 2.86042500  | 3.66594900  | -1.24505800 |
| C | 1.49997400  | 3.96920500  | -1.49856500 |
| C | 3.85234400  | 4.48168700  | -1.83744200 |
| C | 1.20375300  | 5.08162900  | -2.29695400 |
| C | 3.53631100  | 5.58386300  | -2.61891500 |
| C | 2.19464800  | 5.88929700  | -2.84787500 |
| H | 0.15865900  | 5.30168200  | -2.49392300 |
| H | 4.32713300  | 6.19367400  | -3.04571200 |
| H | 1.92072100  | 6.74161800  | -3.46349500 |
| C | 2.43726700  | -1.65645900 | 1.47513900  |
| C | 3.79356500  | -2.03639200 | 1.76294000  |
| C | 4.06491500  | -2.77556300 | 2.94050300  |
| C | 3.01483700  | -3.09479700 | 3.77263900  |
| C | 1.68463200  | -2.68727200 | 3.47460000  |

|   |             |             |             |
|---|-------------|-------------|-------------|
| C | 1.37403100  | -1.97870200 | 2.33180100  |
| C | 3.72695700  | -0.85665900 | -0.18555500 |
| C | 4.58481900  | -1.52367700 | 0.71836300  |
| H | 5.08157000  | -3.07721800 | 3.17708600  |
| H | 3.19788900  | -3.66141100 | 4.68103400  |
| H | 0.88677900  | -2.96027100 | 4.15697400  |
| H | 0.36154000  | -1.66577800 | 2.11072600  |
| H | 5.66030200  | -1.56850400 | 0.63646500  |
| N | 2.43384100  | -0.96052800 | 0.30592700  |
| H | 1.57745000  | -0.67298600 | -0.19986500 |
| C | 4.03616900  | -0.07861300 | -1.33999800 |
| C | 5.38958000  | -0.14642800 | -1.93236800 |
| C | 6.10165000  | -1.35822700 | -1.98869500 |
| C | 5.98596700  | 0.99788600  | -2.49448700 |
| C | 7.36768200  | -1.41732300 | -2.56675500 |
| H | 5.63741500  | -2.25778700 | -1.60563000 |
| C | 7.25334500  | 0.93787500  | -3.06640300 |
| H | 5.45589200  | 1.94433100  | -2.47853600 |
| C | 7.95293700  | -0.27001700 | -3.10321900 |
| H | 7.89402100  | -2.36688800 | -2.60607100 |
| H | 7.69633400  | 1.83761900  | -3.48394600 |
| H | 8.94054600  | -0.31703500 | -3.55264600 |
| C | 3.11114900  | 0.84580100  | -1.81799900 |
| H | 2.06069900  | 0.74389300  | -1.57517200 |
| H | 3.32304200  | 1.36700100  | -2.74447800 |
| H | 4.89782000  | 4.24585100  | -1.65379600 |
| C | 0.35482300  | 3.14690400  | -0.98638500 |
| H | 0.07308700  | 3.43933200  | 0.03029800  |
| H | -0.53244900 | 3.28888100  | -1.60585200 |
| H | 0.57767600  | 2.08167200  | -0.99784900 |

**(S)-5d**

|   |             |             |             |
|---|-------------|-------------|-------------|
| H | -1.36830000 | -2.69650300 | -1.22500700 |
| C | 0.70359800  | 1.65356200  | 0.30673200  |
| C | 1.53998700  | 0.57785700  | -0.00475500 |
| C | 2.86592000  | 0.50009200  | 0.42353300  |
| C | 3.33384000  | 1.54426500  | 1.22094300  |
| H | 4.36527800  | 1.51067100  | 1.56200500  |
| C | -0.67974600 | 1.67723200  | -0.25126700 |
| C | -1.53047900 | 0.60458600  | 0.02461800  |
| C | -2.86385800 | 0.56887300  | -0.39013900 |
| C | -3.32384000 | 1.65381300  | -1.13591300 |
| H | -4.36046900 | 1.65561500  | -1.46312000 |
| O | 1.02814300  | -0.46985900 | -0.77848900 |

|   |             |             |             |
|---|-------------|-------------|-------------|
| O | -1.02558800 | -0.48902900 | 0.73161400  |
| P | -0.00169300 | -1.49048000 | -0.05034200 |
| O | -0.75096500 | -1.96451400 | -1.39096700 |
| O | 0.51483600  | -2.52753100 | 0.85528400  |
| C | 2.51048600  | 2.59903500  | 1.62975400  |
| C | 3.09754200  | 3.67485600  | 2.52648700  |
| C | 1.17574000  | 2.64978400  | 1.19119100  |
| C | 2.03997800  | 4.46381700  | 3.30209800  |
| H | 3.67308100  | 4.37421900  | 1.90137400  |
| H | 3.82121600  | 3.22094500  | 3.21367900  |
| C | 0.21776900  | 3.68433100  | 1.75964600  |
| C | 0.92200700  | 4.90488600  | 2.35644000  |
| H | 2.50395600  | 5.32660700  | 3.79369600  |
| H | 1.61465000  | 3.83350600  | 4.09514900  |
| H | -0.51492100 | 3.99566400  | 1.01291300  |
| H | -0.36791600 | 3.18824700  | 2.54875600  |
| H | 0.19038400  | 5.53227600  | 2.87851200  |
| H | 1.34870400  | 5.51725800  | 1.54909700  |
| C | -1.14410900 | 2.71775800  | -1.08735400 |
| C | -0.17372500 | 3.75883000  | -1.62106700 |
| C | -2.48478200 | 2.70944100  | -1.51101300 |
| C | -0.86161400 | 5.01599600  | -2.15748000 |
| H | 0.39468800  | 3.28638300  | -2.43669300 |
| H | 0.57171100  | 4.02300300  | -0.86882300 |
| C | -3.06160000 | 3.83332000  | -2.35382300 |
| C | -1.99798300 | 4.63503100  | -3.10775300 |
| H | -0.12449800 | 5.65139700  | -2.66166400 |
| H | -1.26816600 | 5.60173000  | -1.32054700 |
| H | -3.80137500 | 3.42288100  | -3.05133300 |
| H | -3.61703400 | 4.51589600  | -1.69294400 |
| H | -2.45150300 | 5.52586600  | -3.55726200 |
| H | -1.59313900 | 4.03120100  | -3.93144100 |
| C | -3.73888100 | -0.58763800 | -0.04855500 |
| C | -4.21192400 | -0.73503900 | 1.27323700  |
| C | -4.07652700 | -1.53377100 | -1.04028200 |
| C | -5.04982900 | -1.86136300 | 1.60816600  |
| C | -4.91665500 | -2.65749900 | -0.69383700 |
| C | -5.38035000 | -2.78931800 | 0.61724300  |
| C | 3.73454400  | -0.65094000 | 0.05027100  |
| C | 4.29980300  | -0.70390800 | -1.24068900 |
| C | 3.98596800  | -1.67059600 | 0.99040100  |
| C | 5.15747500  | -1.80937700 | -1.59401300 |
| C | 4.85372200  | -2.76697500 | 0.62988100  |
| C | 5.41530600  | -2.80571400 | -0.64864700 |

|   |             |             |             |
|---|-------------|-------------|-------------|
| C | -3.89692100 | 0.19898800  | 2.30873200  |
| C | -5.52040800 | -2.00175700 | 2.94965200  |
| C | -4.36777200 | 0.02836000  | 3.58321100  |
| C | -5.18947900 | -1.08706600 | 3.91186700  |
| H | -6.14817900 | -2.85657600 | 3.18780600  |
| H | -5.55150900 | -1.20593100 | 4.92899500  |
| H | -4.11333600 | 0.74939700  | 4.35479200  |
| H | -3.27398400 | 1.05305100  | 2.06842600  |
| H | -6.00977200 | -3.63832200 | 0.87426200  |
| C | -3.59608300 | -1.44484200 | -2.38662900 |
| C | -3.92461800 | -2.39297900 | -3.31959600 |
| C | -5.24275700 | -3.61696200 | -1.70165600 |
| C | -4.76310300 | -3.49253800 | -2.97718500 |
| H | -5.87866000 | -4.45453700 | -1.42645400 |
| H | -5.01451900 | -4.23164700 | -3.73230500 |
| H | -3.54043300 | -2.30880600 | -4.33204800 |
| H | -2.94694300 | -0.61995900 | -2.65384700 |
| C | 5.72483800  | -1.85389500 | -2.90431500 |
| C | 4.06289800  | 0.30526600  | -2.22534600 |
| C | 5.11154500  | -3.79073800 | 1.59218400  |
| C | 3.39917600  | -1.67577700 | 2.29425700  |
| C | 5.46729000  | -0.86937300 | -3.81946800 |
| C | 4.62488000  | 0.22479100  | -3.47182500 |
| C | 4.54033400  | -3.74883000 | 2.83472600  |
| C | 3.66811600  | -2.67920800 | 3.18522600  |
| H | 6.36766600  | -2.69320000 | -3.15785500 |
| H | 5.90373300  | -0.91643100 | -4.81314900 |
| H | 4.42823100  | 1.00150600  | -4.20562100 |
| H | 3.42443100  | 1.14353300  | -1.96878700 |
| H | 5.77010400  | -4.60824000 | 1.30961400  |
| H | 4.74084100  | -4.53566600 | 3.55641800  |
| H | 3.20201900  | -2.66990500 | 4.16615400  |
| H | 2.71786200  | -0.87715400 | 2.56259000  |
| H | 6.06579200  | -3.63531400 | -0.91704300 |

## **H<sub>2</sub>O**

|   |            |             |             |
|---|------------|-------------|-------------|
| O | 0.00000000 | 0.00000000  | 0.11972000  |
| H | 0.00000000 | 0.76154500  | -0.47888000 |
| H | 0.00000000 | -0.76154500 | -0.47888000 |

## **TS5'**

|   |            |            |             |
|---|------------|------------|-------------|
| H | 1.70003200 | 0.49752600 | -0.74909100 |
| N | 2.73914400 | 0.61741900 | -0.55229900 |
| N | 0.74430200 | 3.01173300 | -0.21817500 |
| H | 0.19173800 | 2.28289000 | 0.25264900  |



|   |             |             |             |
|---|-------------|-------------|-------------|
| C | 2.93055600  | 2.11225200  | 0.49676000  |
| C | 2.34864600  | 1.44425500  | 1.75924600  |
| H | 1.28691400  | 1.65578500  | 1.84742100  |
| H | 2.83265200  | 1.85365200  | 2.64500800  |
| C | 2.52999400  | -0.12430300 | 1.68028000  |
| H | 1.52728300  | -0.50769500 | 1.47696600  |
| C | 3.29727000  | -0.32517600 | 0.40655300  |
| C | 3.51448700  | 0.50260400  | -1.74112500 |
| C | 3.29704700  | 1.10316100  | -2.96724300 |
| H | 2.42058200  | 1.71666100  | -3.14553400 |
| C | 4.27471800  | 0.89089500  | -3.94785000 |
| H | 4.15902200  | 1.34955000  | -4.92490100 |
| C | 5.39849200  | 0.09914400  | -3.68184300 |
| H | 6.14458900  | -0.04141600 | -4.45870800 |
| C | 5.56535200  | -0.54051400 | -2.44847900 |
| H | 6.42596800  | -1.17781400 | -2.26902900 |
| C | 4.59522600  | -0.34925700 | -1.46872900 |
| C | 4.43262600  | -0.86649500 | -0.09895200 |
| C | 5.43756900  | -1.77513200 | 0.53317900  |
| H | 5.83101000  | -2.47423400 | -0.21068500 |
| H | 6.28899700  | -1.19816200 | 0.91756400  |
| H | 5.01020300  | -2.34965400 | 1.35360100  |
| C | 2.11902600  | 3.15398300  | -0.13170200 |
| C | 2.48829600  | 4.30980400  | -0.81769300 |
| H | 3.48668600  | 4.71052100  | -0.89275700 |
| C | 1.30331400  | 4.87551200  | -1.36909500 |
| C | 1.02612500  | 6.00038000  | -2.17353000 |
| H | 1.82408700  | 6.67568800  | -2.47061700 |
| C | -0.27680800 | 6.21347400  | -2.58969300 |
| H | -0.50733400 | 7.06951500  | -3.21781300 |
| C | -1.31971400 | 5.32656800  | -2.22562900 |
| H | -2.32780100 | 5.51097300  | -2.58418700 |
| C | -1.08537300 | 4.22164500  | -1.42421900 |
| H | -1.87327600 | 3.52777000  | -1.15789700 |
| C | 0.22881300  | 4.01540600  | -0.98970500 |
| C | 4.41772700  | 2.36328300  | 0.51164400  |
| C | 5.09957600  | 2.74005900  | -0.65967300 |
| H | 4.55337800  | 2.87008000  | -1.58143400 |
| C | 6.47959200  | 2.92460800  | -0.66494700 |
| H | 6.97409400  | 3.20089100  | -1.59136800 |
| C | 7.21912500  | 2.74593700  | 0.50300100  |
| H | 8.29614100  | 2.88719000  | 0.49916500  |
| C | 6.55920400  | 2.38756200  | 1.67760800  |
| H | 7.11561400  | 2.25409700  | 2.60085400  |

|   |             |             |             |
|---|-------------|-------------|-------------|
| C | 5.17871100  | 2.19653400  | 1.67916500  |
| H | 4.70650700  | 1.91456300  | 2.60960300  |
| C | 2.99835600  | -0.76206400 | 2.96701600  |
| C | 4.34777100  | -0.76785900 | 3.33452700  |
| H | 5.07630900  | -0.31084100 | 2.67631200  |
| C | 4.77511000  | -1.35521100 | 4.52411900  |
| H | 5.83108400  | -1.35667100 | 4.78004100  |
| C | 3.83810000  | -1.93653800 | 5.37532900  |
| H | 4.15308400  | -2.40289900 | 6.30484300  |
| C | 2.48687100  | -1.90125100 | 5.03487700  |
| H | 1.75258100  | -2.33568700 | 5.70868800  |
| C | 2.04002900  | -1.31367400 | 3.84513200  |
| C | 0.56056000  | -1.27508000 | 3.54246500  |
| H | 0.20294300  | -0.26340700 | 3.32487400  |
| H | 0.30743700  | -1.88189300 | 2.66819400  |
| H | -0.00970900 | -1.66287900 | 4.39235300  |
| C | -3.69656200 | -1.39130000 | 0.27696800  |
| C | -3.37115400 | -0.03442700 | 0.13775200  |
| C | -4.05744000 | 0.95970700  | 0.84403000  |
| C | -5.06624700 | 0.54527000  | 1.71636600  |
| H | -5.61393500 | 1.30768800  | 2.26481000  |
| C | -2.96044000 | -2.38590500 | -0.55384400 |
| C | -1.56797300 | -2.44684200 | -0.43041800 |
| C | -0.79711200 | -3.36729100 | -1.14248300 |
| C | -1.47513700 | -4.23238400 | -2.00535600 |
| H | -0.89428700 | -4.95946700 | -2.56706300 |
| O | -2.32552000 | 0.30649900  | -0.71550000 |
| O | -0.94350600 | -1.53769600 | 0.40934100  |
| P | -0.79516400 | 0.01827400  | -0.14758700 |
| O | 0.16070000  | 0.09300000  | -1.30991800 |
| O | -0.51992900 | 0.85821000  | 1.06924400  |
| C | -5.36325100 | -0.80102400 | 1.94080700  |
| C | -6.45765400 | -1.15518400 | 2.93162100  |
| C | -4.65850900 | -1.78728900 | 1.23065200  |
| C | -6.35217500 | -2.58615600 | 3.46393800  |
| H | -7.43307300 | -1.03377300 | 2.43625100  |
| H | -6.44930500 | -0.43475300 | 3.75832800  |
| C | -4.83635100 | -3.25734300 | 1.57539000  |
| C | -6.14833300 | -3.56015600 | 2.30238900  |
| H | -7.25148700 | -2.83917000 | 4.03769000  |
| H | -5.50009600 | -2.66316400 | 4.15362300  |
| H | -4.74191000 | -3.88448000 | 0.68685700  |
| H | -3.99470000 | -3.54699100 | 2.22340500  |
| H | -6.14110600 | -4.59759800 | 2.65686500  |

|   |             |             |             |
|---|-------------|-------------|-------------|
| H | -6.99002400 | -3.47004900 | 1.60052300  |
| C | -3.61085000 | -3.21203400 | -1.49445000 |
| C | -5.07857300 | -2.99120000 | -1.82302100 |
| C | -2.85575600 | -4.16068000 | -2.20698900 |
| C | -5.72874400 | -4.17429100 | -2.54413800 |
| H | -5.13976800 | -2.10150700 | -2.46841400 |
| H | -5.64710100 | -2.73342200 | -0.92717000 |
| C | -3.50207600 | -5.12323500 | -3.18717300 |
| C | -4.85391000 | -4.63373100 | -3.71145300 |
| H | -6.72851500 | -3.88841200 | -2.89145900 |
| H | -5.86318300 | -5.00857700 | -1.84055800 |
| H | -2.81260300 | -5.31525600 | -4.01797300 |
| H | -3.64778800 | -6.09238000 | -2.68597400 |
| H | -5.34492200 | -5.43076000 | -4.28203800 |
| H | -4.70126600 | -3.79230800 | -4.40135500 |
| C | 0.68594000  | -3.43544400 | -1.04346700 |
| C | 1.30982000  | -3.92311000 | 0.12584600  |
| C | 1.45997900  | -3.08971400 | -2.17260400 |
| C | 2.73559900  | -4.15009800 | 0.12801300  |
| C | 2.87346900  | -3.37679500 | -2.18074400 |
| C | 3.46669700  | -3.92297200 | -1.04090400 |
| C | -3.78141200 | 2.41989700  | 0.70662000  |
| C | -2.98612000 | 3.08204800  | 1.66574000  |
| C | -4.41410700 | 3.14819100  | -0.32401900 |
| C | -2.81756700 | 4.51398200  | 1.58412600  |
| C | -4.26459000 | 4.58321500  | -0.37709200 |
| C | -3.47318400 | 5.22617800  | 0.57750500  |
| C | 0.58370000  | -4.21516000 | 1.32209600  |
| C | 3.36277600  | -4.60519100 | 1.32839900  |
| C | 1.22632200  | -4.62980100 | 2.45905800  |
| C | 2.63693600  | -4.81680600 | 2.46936400  |
| H | 4.43737300  | -4.76880300 | 1.31759100  |
| H | 3.13064100  | -5.13042300 | 3.38413800  |
| H | 0.65693600  | -4.81420300 | 3.36540900  |
| H | -0.49162800 | -4.07957100 | 1.32382500  |
| H | 4.52874100  | -4.15403000 | -1.05529300 |
| C | 0.89650700  | -2.43988900 | -3.31559900 |
| C | 1.66904900  | -2.13335800 | -4.40347300 |
| C | 3.63353100  | -3.07361000 | -3.35072000 |
| C | 3.05209800  | -2.46961200 | -4.43104500 |
| H | 4.69441900  | -3.30790600 | -3.34995200 |
| H | 3.64809100  | -2.22085800 | -5.30403200 |
| H | 1.22769800  | -1.61658300 | -5.25074900 |
| H | -0.14749800 | -2.15533500 | -3.28783400 |

|   |             |            |             |
|---|-------------|------------|-------------|
| C | -1.97820900 | 5.16831600 | 2.53728900  |
| C | -2.32722400 | 2.38440700 | 2.72569300  |
| C | -4.91011100 | 5.30747600 | -1.42571000 |
| C | -5.21169700 | 2.51658700 | -1.32927600 |
| C | -1.35329800 | 4.45935500 | 3.52684300  |
| C | -1.53710000 | 3.05026500 | 3.62347400  |
| C | -5.65795000 | 4.66215100 | -2.37386400 |
| C | -5.80913100 | 3.24701300 | -2.32205600 |
| H | -1.84616700 | 6.24393800 | 2.45343400  |
| H | -0.71391500 | 4.96777800 | 4.24332600  |
| H | -1.03345900 | 2.49749400 | 4.41167700  |
| H | -2.43664800 | 1.30997000 | 2.78385300  |
| H | -4.78832100 | 6.38754800 | -1.45385300 |
| H | -6.13964500 | 5.22498300 | -3.16845600 |
| H | -6.40394500 | 2.74554700 | -3.08028100 |
| H | -5.32981000 | 1.43918400 | -1.29583900 |
| H | -3.34244300 | 6.30404000 | 0.51912100  |

**(R,S)-3aa**

|   |             |             |             |
|---|-------------|-------------|-------------|
| N | -0.18524400 | -0.93416600 | -0.24752100 |
| N | 2.34061700  | 0.40407200  | -0.50111800 |
| H | 2.31130100  | -0.47318100 | -1.00233200 |
| C | 0.32983200  | -0.16879800 | 0.89861400  |
| C | -0.97260200 | 0.58904700  | 1.28987800  |
| H | -1.58059100 | -0.07098200 | 1.91407600  |
| H | -0.77235400 | 1.50048400  | 1.85423400  |
| C | -1.71841100 | 0.84744700  | -0.05472800 |
| H | -1.28955700 | 1.74770800  | -0.51076200 |
| C | -1.27672400 | -0.33899600 | -0.86714800 |
| C | 0.31121600  | -1.94289500 | -1.04857200 |
| C | 1.39958400  | -2.80777700 | -0.88384800 |
| H | 2.02407100  | -2.76414900 | 0.00249100  |
| C | 1.63286400  | -3.74241600 | -1.89036300 |
| H | 2.47016300  | -4.42740100 | -1.79322500 |
| C | 0.79974600  | -3.82198000 | -3.02235200 |
| H | 1.00994200  | -4.56620500 | -3.78515100 |
| C | -0.28536100 | -2.96539100 | -3.17814100 |
| H | -0.92164900 | -3.03540100 | -4.05631000 |
| C | -0.54387100 | -2.00118800 | -2.19292300 |
| C | -1.54713000 | -0.96615900 | -2.05709900 |
| C | -2.64011900 | -0.65943400 | -3.03380300 |
| H | -3.29264700 | -1.52758100 | -3.19526700 |
| H | -2.23428000 | -0.37718900 | -4.01395000 |
| H | -3.26769300 | 0.16242700  | -2.67910600 |

|   |             |             |             |
|---|-------------|-------------|-------------|
| C | 1.38955600  | 0.80149900  | 0.42526700  |
| C | 1.64875800  | 2.10083300  | 0.79616000  |
| H | 1.09425900  | 2.67828200  | 1.52200300  |
| C | 2.80244600  | 2.54061200  | 0.06015200  |
| C | 3.53228300  | 3.73927000  | -0.00065500 |
| H | 3.24769400  | 4.58789300  | 0.61567800  |
| C | 4.61962200  | 3.82193000  | -0.86045400 |
| H | 5.19170100  | 4.74365100  | -0.91630100 |
| C | 4.99640200  | 2.72833000  | -1.66693900 |
| H | 5.85087500  | 2.82495600  | -2.33052400 |
| C | 4.29634400  | 1.52821200  | -1.62814300 |
| H | 4.58607800  | 0.68482200  | -2.24854100 |
| C | 3.20535800  | 1.44780000  | -0.75841600 |
| C | 0.82019200  | -1.09674600 | 2.00972000  |
| C | 0.10755100  | -2.27052500 | 2.28820800  |
| H | -0.75816400 | -2.52402200 | 1.68421100  |
| C | 0.51466100  | -3.11850000 | 3.31494100  |
| H | -0.04386200 | -4.02878000 | 3.51393200  |
| C | 1.64025800  | -2.80383300 | 4.07985200  |
| H | 1.96038500  | -3.46674600 | 4.87866900  |
| C | 2.35222600  | -1.63674500 | 3.80797500  |
| H | 3.23083400  | -1.38402400 | 4.39483300  |
| C | 1.94564200  | -0.78741500 | 2.77702400  |
| H | 2.50424600  | 0.11877000  | 2.56766900  |
| C | -3.20936700 | 1.03995600  | 0.12927200  |
| C | -4.05984700 | -0.07034500 | 0.16572300  |
| H | -3.63738700 | -1.05829800 | 0.00608600  |
| C | -5.42857300 | 0.07530000  | 0.38308400  |
| H | -6.07104600 | -0.80047300 | 0.40283600  |
| C | -5.96301900 | 1.34874100  | 0.56951700  |
| H | -7.02843700 | 1.47960500  | 0.73688400  |
| C | -5.12105100 | 2.45948800  | 0.53936800  |
| H | -5.53720800 | 3.45319700  | 0.68634600  |
| C | -3.74446400 | 2.32908600  | 0.32365700  |
| C | -2.87014300 | 3.56162800  | 0.30250400  |
| H | -2.39717100 | 3.71033700  | -0.67636000 |
| H | -2.06166600 | 3.50589600  | 1.04109200  |
| H | -3.45859600 | 4.45686100  | 0.52326900  |
